# Supplementary material for: Time-Course Microarray Analysis Reveals Differences between Transcriptional Changes in Tomato Leaves Triggered by Mild and Severe Variants of Potato Spindle Tuber Viroid
Source: MDPI journal article supplement (doi:10.3390/v10050257), 2018-05-15
Supplement: s1 [file s1]

## PSTVd-M

### Biological Process

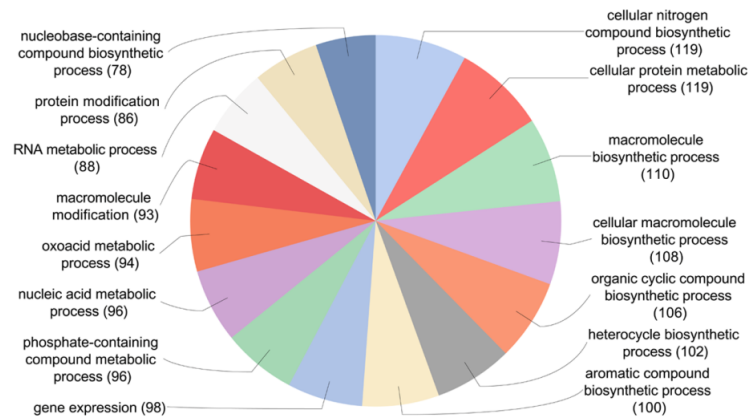

### Cellular Component

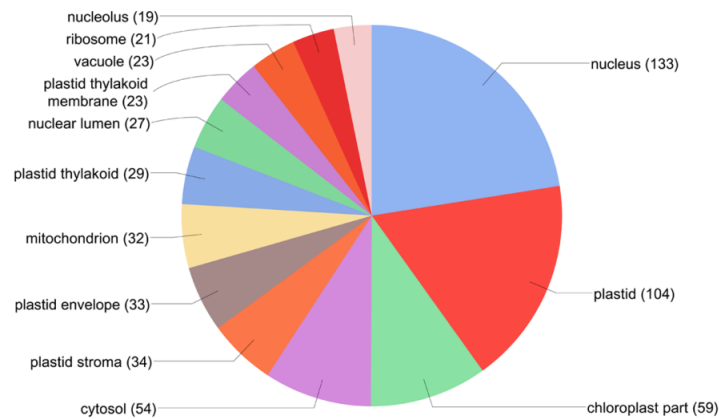

### Molecular Function

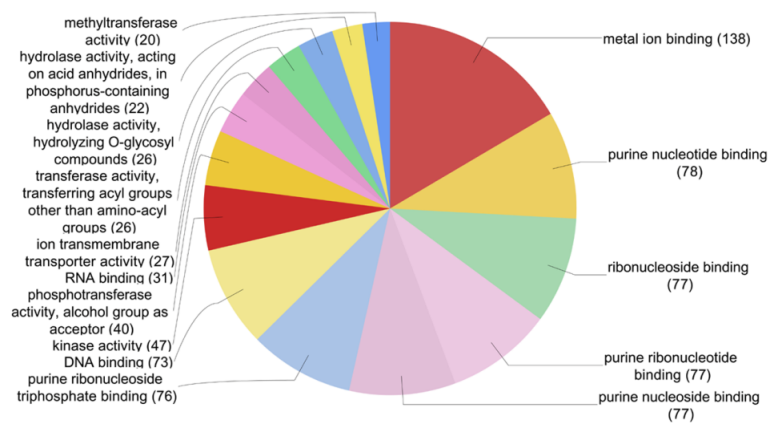

## PSTVd-S23

### Biological Process

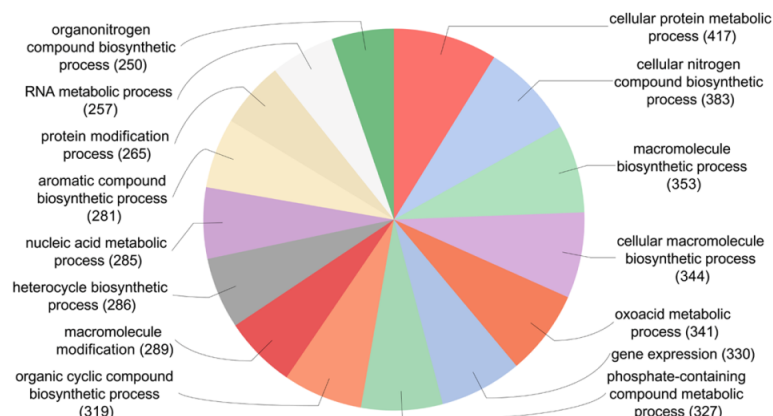

### Cellular Component

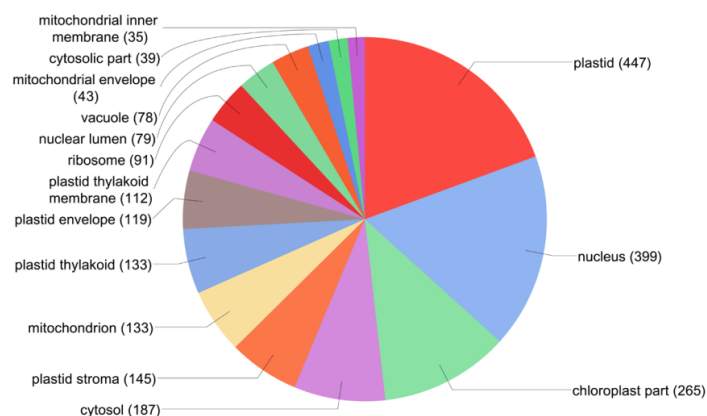

### Molecular Function

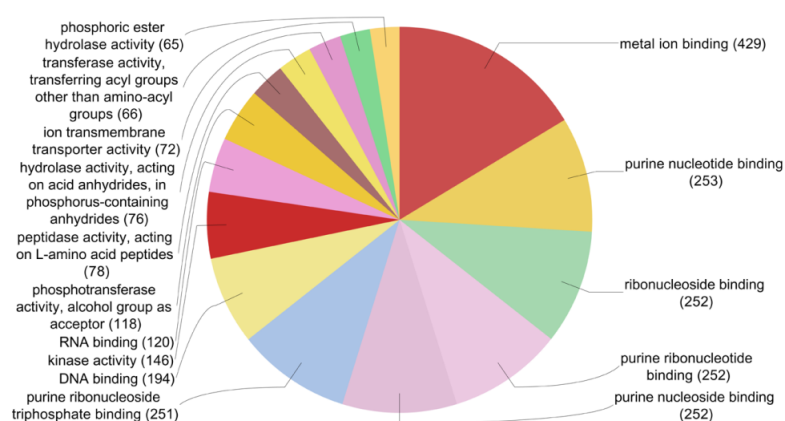

**Figure S1.** Gene Ontology (GO) terms assigned to the complete list of the differentially expressed genes. Pie charts represent the GO term distributions in plants infected with PSTVd-M (A) and PSTVd-S23 (B) as determined by Blast2GO under the biological process, molecular function and cellular component categories at GO level 5 with a 5-node score cutoff. The numbers in brackets represent the number of genes assigned to each GO term. 15 most abundant GO terms are presented.
