# Supplementary material for: Time-Course Microarray Analysis Reveals Differences between Transcriptional Changes in Tomato Leaves Triggered by Mild and Severe Variants of Potato Spindle Tuber Viroid
Source: Viruses. 2018 May 15;10(5):257. doi: 10.3390/v10050257 (PMC5977250; doi:10.3390/v10050257)
Supplement: Supplementary file 1 [file viruses-10-00257-s001.zip]

Archive with 9 entries (9 files):
- Figure S1.pdf
- Table S1.xlsx
- Table S2.xlsx
- Table S3.xlsx
- Table S4.xlsx
- Table S5.xlsx
- Table S6.xlsx
- Table S7.xlsx
- Table S8.xlsx
