# Supplementary material for: Time-Course Microarray Analysis Reveals Differences between Transcriptional Changes in Tomato Leaves Triggered by Mild and Severe Variants of Potato Spindle Tuber Viroid
Source: Viruses. 2018 May 15;10(5):257. doi: 10.3390/v10050257 (PMC5977250; doi:10.3390/v10050257)
Supplement: Supplementary file 1 [file viruses-10-00257-s001.zip › Table S1.xlsx]

## Sheet: nCounter CodeSet
Table S1: Nanostring nCounter analysis of the selected DEGs
	nCounter CodeSet
No.	Gene name	Accession number	Targeted region	nCounter target sequence
1	gibberellin 20-oxidase-1 (20ox-1)	NM_001247141.1	907-1006	GGCGTTCCATCAGTCCAAATTTCAATGCATTTGTGGTTAATATAGGCGACACATTTATGGCGCTATCAAATGGAAGATACAAAAGTTGCCTACACAGAGC
2	1-aminocyclopropane-1-carboxylate oxidase 1 (ACO1)	NM_001247095.2	967-1066	GGACTCAAGTTTCAAGCCAAAGAGCCAAGATTTGAAGCAATGAAGGCAATGGAAAGTGATCCAATTGCAAGTGCTTAGATCCCAATTCAATTAAAAAAAT
3	wound-induced proteinase inhibitor 2-like(PII2)	XM_004250378.2	206-305	GGATGCAGCAAATGCTTGTCCCCGTAATTGTAATCCAAGTATTCAATATGGGAGATGCCCAAAATCTGGAAACAAAAAGTTCAAAGTTGGATGCACAAAT
4	ethylene responsive element binding protein (EREB)	NM_001247889.2	358-457	GAGGTGTTAGGAGGCGTCCATGGGGTAAATTCGCAGCGGAGATAAGAGATTCTACGAGAAATGGGGTTCGAGTATGGTTAGGGACATTTGATAGCGCGGA
5	probable WRKY transcription factor 40-like (WRKY40)	NM_001316915.1	959-1058	GCGTAAATCACCAGGAACTGATCAACAACAGCAAAATAGACCAGAGTTTCAACATTTCTTGATAGAACAAATGGCTTCATCATTGACTAAAGATCCAAGT
6	putative lipid-transfer protein DIR1	XM_010320191.1	40-139	GATGGAGCATTATAACTTTGCCCAAAAGATCATGACATTGGCTTTGTTTGCCATAGTGTTAAGTAGTGTTAATATAGAGGTGGTGCGGGCACAAGGAATA
7	transcription factor MYB1R1-like	XM_004237025.2	541-640	AGGTCTAGTCTATTCGACATCACCACTGATACTGTTCAGGGTGCTGCTAAATTGGAAGATAATAAGCAAATGAATGATTGTCGGATGTCAGTTTTCCGGC
8	beta-1.3-glucanase	NM_001247869.2	760-859	TACTGAGAAACTTGGAGGACAAAATATTGAGATTATTGTATCGGAAAGTGGTTGGCCTTCTGAAGGACACCCTTCCGCTACTCTTGAAAACGCGATGACT
9	heat shock protein 70-3 (hsc70.3)	NM_001279284.2	1959-2058	AGTGCTGGTGCAGGCCCTAAGATTGAGGAAGTGGACTAAGCTCCACATTACCTAGTGTATGGTGAAATCTAGTTCTTGAGTAGTAGAAATAAGATGATGT
10	expansin A4 (EXPA4)	NM_001247152.2	734-833	ACTAATTCACCTTTAGTGGGTCAAGCCCTTTCTATTCGGGTTAAAGCTAGTGATCATCGTAGTGTCACGAATGTCAACGTGGCACCCTCTAATTGGCAGT
11	auxin response factor 9 (ARF9)	XM_010326986.1	2037-2136	TTCATTTGTTCAAGTCAGGATATGAAAAAATTGACCCTGTCTCGCGCAGACAGTTAAGCAGCTCCTTTCAAATGAAATGATGGCGGAAGATGGTGAAAGT
12	acid invertase (Wiv-1)	NM_001246913.1	1295-1394	AAGGCAGAGCCATTTGATTCTAGTTGGGCTGATCTTTATGCGCAAGATGTATGCGCCATTAAAGGTTCAACGGTTCAAGGTGGTCTTGGGCCTTTTGGGC
13	beta-galactosidase (TBG7)	NM_001247378.2	2606-2705	AGAATTCTGCAGCACTGGTCGAAAAGGTTTGCCTGAACCAAAATGAGTGTGCATTAGAAATGTCCAGCGCAAACTTTAACATGCAATTGTGTCCAAGTAC
14	lysine histidine transporter-like 8-like	XM_004248591.2	1238-1337	CATCTCCGTAGCATTTCCTTTCTTGGGAAGCCTAGCCGCGTTTGTAGGAGGGATTGCGTTGCCATTGTCTCTGGTTTACCCTTGCTTCATGTGGATTTCA
15	DNA-damage-repair/toleration protein DRT100-like	XM_004250811.2	774-873	TTGAACAAACTGTCTGGTACCATACCTCCGTCTCTTGGTAAAATGCACGTACTTGCAACGTTAAATCTTGATGGTAACCATATTTCTGGTACGATACCTC
16	calmodulin-like protein 5-like	XM_004228967.2	281-380	AGATTAGCAGAGAAGATCTACGAACATCGTACGGTGGATTCGTCGGCGACGATATGATTGGTACGATGATGACGGTGGCGGATTCGAACGAAGATGGATA
17	tubulin alpha chain-like	XM_004232178.2	471-570	TAGCTGACAACTGCACTGGGCTTCAAGGATTTTTGGTGTTCCATGCTGTTGGTGGGGGTACTGGTTCAGGGCTCGGTTCTCTGCTTCTTGAGAGGCTTTC
18	ripening regulated protein DDTFR18 (DDTFR18)	NM_001247469.1	954-1053	CGGAGTGCGAGTAGCGAACGAGCTAGGTGCTGGAAGAGGAAAGGCAGCAAAATTCGCAACAGCGGTATCAGTGATACAATCAACCATTATAGGGCTAATA
19	aquaporin TIP2-1	NM_001302916.1	124-223	TTAGGGTCTATTAAGGCCTACATTGCTGAATTCATCTCTACTTTGCTCTTTGTCTTCGCCGGAGTTGGTTCAGCTATTGCTTACAACAAGGTGACAGCTG
20	PSTVd-S23 and PSTVd-M	X76846.1	143-242	GCGGCCGACAGGAGTAATTCCCGCCGAAACAGGGTTTTCACCCTTCCTTTCTTCGGGTGTCCTTCCTCGCGCCCGCAGGACCACCCCTCGCCCCTTTGCG
21	glyceraldehyde 3-phosphate dehydrogenase (GAPDH)	NM_001247874.2	343-442	ATTGTGGAGTCGACCGGTGTTTTCACTGATAAGGACAAAGCTGCAGCTCATTTGAAGGGTGGCGCCAAGAAAGTTATCATTTCTGCCCCTAGTAAGGATG
22	alpha glucosidase II (gluII)	NM_001247101.2	1591-1690	ATGAATGAACCTTCCGTCTTCAATGGACCAGAGGTAACAATGCCAAGAGATGCTTTACATCATGGAGGAGTAGAGCACAGGGAGTTGCACAATTCATATG
23	actin (ACT)	NM_001321306.1	81-180	AAGCCGCCGGCCATAATCTCCGGTTGCTTTGCTAAATCTACGGTGACCACTTTCCGATCTCCTCTCAGTTCCCGTTGAATAGAAAATGGCTGACGGTGAG

## Sheet:  microarray validation
Table S1: NanoString nCounter analysis of the selected DEGs
Validation of microarray data by NanoString nCounter analysis. Expression values for 19 selected genes are indicated as log2 fold change values for PSTVd-infected samples compared to mock-inoculated.
Gene	Expression change
	M - 17 dpi		S23 - 17 dpi		M - 24 dpi		S23 - 24 dpi		M - 49 dpi		S23 - 49 dpi
	Microarray	NanoString	Microarray	NanoString	Microarray	NanoString	Microarray	NanoString	Microarray	NanoString	Microarray	NanoString
1-aminocyclopropane-1-carboxylate oxidase 1	-	-	7.01***	5.98**	4.62**	4.03**	4**	3.42**	-	-	5.68***	6.85
acid invertase	-	-	4.94***	3.84**	2.46**	1.89*	1.76*	1.34	0.54	1.16*	4.21***	3.98
aquaporin TIP2-1-like	-	-	-3.75*	-1.53	-1.78	-0.70**	-3.16*	-2.61	-	-	-4.84**	-4.79*
auxin response factor 9	-	-	-1.46	-2.15*	-1.85*	-0.99	-2.37**	-2.77*	-	-	-1.94**	-2.74
beta-1,3-glucanase	-	-	5.9***	4.91*	3.32*	2.54**	4.57**	3.37**	-	-	4.17**	4.23
beta-galactosidase	-	-	-2.44**	-1.65**	-	-	-2.63**	-1.84	-	-	-3.38***	-3.72*
calmodulin-like protein 5-like	-	-	5.85***	4.00**	2.51**	1.96**	4.41***	3.19**	-	-	4.26***	3.85***
DNA-damage-repair/toleration protein DRT100-like	-	-	-3.22*	-2.56*	-	-	-4.37***	-3.43	-	-	-2.77*	-3.91
ethylene responsive element binding protein	3.56***	4.40**	4.56***	5.03**	2.46**	1.71*	-	-	-	-	1.87*	1.41
expansin A4	-	-	-1.09*	-1.18	-0.89	-0.56**	-2***	-1.69	-	-	-2.18***	-3.00*
gibberellin 20-oxidase-1	-	-	-3.06***	-1.88*	-	-	4.59***	3.58***	-1.69*	-1.10	-	-
heat shock protein 70-3	-	-	2.86	1.90**	1.7*	1.52*	4.62***	4.38***	1.6*	1.68*	4.85***	3.88
lysine histidine transporter-like 8-like	-	-	6.42***	4.26**	-	-	3.53**	1.87**	-	-	5.57***	3.40*
probable WRKY transcription factor 40-like	-	-	5.03***	6.47*	3.99***	3.26*	3.31**	2.97*	2.48*	3.53*	4.37***	4.75
putative lipid-transfer protein DIR1-like	-	-	-4.33*	-4.19*	-3.1	-2.34**	-6.73***	-5.10*	-	-	-7.44***	-10.35*
ripening regulated protein DDTFR18	-	-			2018-12-01	0.96*	4.73***	3.52***	-	-	4.17***	3.89*
transcription factor MYB1R1-like	-	-	3.49**	3.31***	3.67**	2.77**	3.29**	2.26**	2.54*	2.96	4.06***	4.14*
tubulin alpha chain-like	-	-	-3.9*	-1.54	-3.08*	-1.30	-4.23**	-2.56	-	-	-3.94*	-3.01
wound-induced proteinase inhibitor 2-like	-2.65*	-1.57*	-1.7	-1.97**	-3.59***	-2.80**	-4.41***	-3.59**	-1.94*	-1.10	-4.41***	-5.82*
A dash (-) indicates a lack of significant changes in both methods. Asterisks: *, ** and *** indicate significant differences of p<0.05, p<0.01 and p<0.001, respectively (Student’s t-test)
