# Supplementary material for: Time-Course Microarray Analysis Reveals Differences between Transcriptional Changes in Tomato Leaves Triggered by Mild and Severe Variants of Potato Spindle Tuber Viroid
Source: Viruses. 2018 May 15;10(5):257. doi: 10.3390/v10050257 (PMC5977250; doi:10.3390/v10050257)
Supplement: Supplementary file 1 [file viruses-10-00257-s001.zip › Table S2.xlsx]

## Sheet: DEG M and S23
Table S2. Tomato DEGs affected by PSTVd-M and PSTVd-S23 infection. GO categories with descriptions and enzyme codes with names are included.
Affymetrix Probe	Gene ID	Gene Symbol	Gene Title	RefSeq Transcript ID	Tomato Accession (ITAG2.4)	PSTVd-M infection 8 dpi			PSTVd-M infection 17 dpi			PSTVd-M infection 24 dpi			PSTVd-M infection 49 dpi			PSTVd-S23 infection 8 dpi			PSTVd-S23 infection 17 dpi			PSTVd-S23 infection 24 dpi			PSTVd-S23 infection 49 dpi			GO ID	GO Name	Enzyme Code	Enzyme Name
						PSTVd-M 8 dpi vs. Mock 8 dpi			PSTVd-M 17 dpi vs. Mock 17 dpi			PSTVd-M 24 dpi vs. Mock 24 dpi			PSTVd-M 49 dpi vs. Mock 49 dpi			PSTVd-S23 8 dpi vs. Mock 8 dpi			PSTVd-S23 17 dpi vs. Mock 17 dpi			PSTVd-S23 24 dpi vs. Mock 24 dpi			PSTVd-S23 49 dpi vs. Mock 49 dpi
						p-value	Ratio	Fold Change	p-value	Ratio	Fold Change	p-value	Ratio	Fold Change	p-value	Ratio	Fold Change	p-value	Ratio	Fold Change	p-value	Ratio	Fold Change	p-value	Ratio	Fold Change	p-value	Ratio	Fold Change
Les.1.1.S1_at	543609	TBG3	beta-galactosidase	NM_001247374	Solyc03g121540.2.1	0.0111013	0.369746	-2.70456				0.0210742	2.2512	2.2512				0.0317063	0.4789	-2.08812	0.0189948	2.38382	2.38382							P:GO:0046486; C:GO:0009341; C:GO:0005618; P:GO:0006012; F:GO:0030246; C:GO:0005773; F:GO:0004565; P:GO:0006027; P:GO:0006687	P:glycerolipid metabolic process; C:beta-galactosidase complex; C:cell wall; P:galactose metabolic process; F:carbohydrate binding; C:vacuole; F:beta-galactosidase activity; P:glycosaminoglycan catabolic process; P:glycosphingolipid metabolic process	EC:3.2.1.23	Beta-galactosidase
Les.10.1.S1_at	543503	3OH-1	gibberellin 3-beta-hydroxylase 1	NM_001246919	Solyc06g066820.2.1																			8.31373e-05	2.68453	2.68453				F:GO:0046872; F:GO:0016707; P:GO:0009686; P:GO:0055114; P:GO:0009740; P:GO:0009416	F:metal ion binding; F:gibberellin 3-beta-dioxygenase activity; P:gibberellin biosynthetic process; P:oxidation-reduction process; P:gibberellic acid mediated signaling pathway; P:response to light stimulus	EC:1.14.11.15; EC:1.14.11	Gibberellin 3-beta-dioxygenase; Acting on paired donors, with incorporation or reduction of molecular oxygen. The oxygen incorporated need not be derived from O(2)
Les.1007.1.A1_at	101261827	LOC101261827	acyl-coenzyme A thioesterase 13-like	XM_004241135	Solyc06g076680.2.1																0.0338048	2.94843	2.94843							C:GO:0005737; F:GO:0047617	C:cytoplasm; F:acyl-CoA hydrolase activity	EC:3.1.2.20	Acyl-CoA hydrolase
Les.101.1.S1_at	544238	ribA	GTP cyclohydrolase II / 3,4-dihydroxy-2-butanone-4-phosphate synthase	NM_001247847	Solyc01g105560.2.1																			1.45505e-07	0.48868	-2.04633				C:GO:0009570; F:GO:0003935; P:GO:0009231; C:GO:0016020; F:GO:0008686	C:chloroplast stroma; F:GTP cyclohydrolase II activity; P:riboflavin biosynthetic process; C:membrane; F:3,4-dihydroxy-2-butanone-4-phosphate synthase activity	EC:3.5.4.25; EC:4.1.99.12	GTP cyclohydrolase II; 3,4-dihydroxy-2-butanone-4-phosphate synthase
Les.1011.1.A1_at	101266117	LOC101266117	DEAD-box ATP-dependent RNA helicase 28-like	XM_004238321	Solyc04g081580.2.1	0.00136263	3.28811	3.28811										0.00849906	2.31557	2.31557	0.0187795	2.19904	2.19904							F:GO:0003676; F:GO:0000166; F:GO:0005524; C:GO:0005737; P:GO:0010501; F:GO:0004386; C:GO:0005730; F:GO:0016787; F:GO:0004004	F:nucleic acid binding; F:nucleotide binding; F:ATP binding; C:cytoplasm; P:RNA secondary structure unwinding; F:helicase activity; C:nucleolus; F:hydrolase activity; F:ATP-dependent RNA helicase activity	EC:3.6.1.3; EC:3.6.1.15	Adenosinetriphosphatase; Nucleoside-triphosphate phosphatase
Les.1013.1.A1_at	101268236	LOC101268236	uncharacterized LOC101268236	XM_004249088	---																0.020758	3.28086	3.28086				0.0102306	3.57928	3.57928
Les.1015.1.A1_at	101256886	CPT7	dimethylallylcistransferase, chloroplastic-like	XM_004241118	Solyc06g076920.2.1				0.0243352	0.260003	-3.84611																			P:GO:0016094; F:GO:0002094; C:GO:0005829; F:GO:0016740; F:GO:0016765	P:polyprenol biosynthetic process; F:polyprenyltransferase activity; C:cytosol; F:transferase activity; F:transferase activity, transferring alkyl or aryl (other than methyl) groups
Les.1020.2.A1_at	101260244	LOC101260244	1-phosphatidylinositol 3-phosphate 5-kinase-like	XM_004242851	Solyc07g017510.2.1																0.015393	2.67538	2.67538	0.0484039	2.07986	2.07986				F:GO:0016307; P:GO:0007033; P:GO:0046854; P:GO:0046488; P:GO:0042147; F:GO:0000166; F:GO:0005524; F:GO:0000285; C:GO:0005768; F:GO:0046872; C:GO:0005829; C:GO:0010008; P:GO:0016310; F:GO:0016740; F:GO:0016301; P:GO:0010256	F:phosphatidylinositol phosphate kinase activity; P:vacuole organization; P:phosphatidylinositol phosphorylation; P:phosphatidylinositol metabolic process; P:retrograde transport, endosome to Golgi; F:nucleotide binding; F:ATP binding; F:1-phosphatidylinositol-3-phosphate 5-kinase activity; C:endosome; F:metal ion binding; C:cytosol; C:endosome membrane; P:phosphorylation; F:transferase activity;…	EC:2.7.1.150	1-phosphatidylinositol-3-phosphate 5-kinase
Les.1022.1.A1_at	101265375	LOC101265375	uncharacterized LOC101265375	XR_183167	---																0.027038	4.25746	4.25746				0.0196725	4.32592	4.32592
Les.103.1.S1_at	543744	CycA1	cyclin A1	NM_001246833	Solyc11g005090.1.1																			0.00146132	0.122668	-8.15208				C:GO:0005634	C:nucleus
Les.104.1.S1_at	543747	CycB2	cyclin B2	NM_001246857	Solyc02g082820.2.1																			0.000724513	0.182805	-5.47032				C:GO:0005634	C:nucleus
Les.1044.1.A1_at	101247828	LOC101247828	methylesterase 17-like	XM_004240795	Solyc06g048570.2.1										0.00964653	2.23276	2.23276				0.0247851	0.481945	-2.07493				1.25598e-05	5.02435	5.02435	F:GO:0016787	F:hydrolase activity
Les.1046.1.S1_at	101247770	LOC101247770	3-oxoacyl-[acyl-carrier-protein] reductase FabG-like	XM_004249271	Solyc10g080900.1.1							0.00198067	3.94204	3.94204	0.00879705	3.01702	3.01702				7.26882e-05	7.37897	7.37897	0.00691157	3.14096	3.14096	4.01783e-06	10.7817	10.7817	C:GO:0005835; P:GO:0042967; F:GO:0004316; P:GO:0055114; P:GO:0006633	C:fatty acid synthase complex; P:acyl-carrier-protein biosynthetic process; F:3-oxoacyl-[acyl-carrier-protein] reductase (NADPH) activity; P:oxidation-reduction process; P:fatty acid biosynthetic process	EC:2.3.1.85; EC:1.1.1.100	Fatty-acid synthase; 3-oxoacyl-[acyl-carrier-protein] reductase
Les.1047.1.S1_at	101252988	LOC101252988	iron-sulfur assembly protein IscA, chloroplastic-like	XM_004239961	Solyc05g051700.2.1																0.00246868	0.288963	-3.46065							C:GO:0005759; F:GO:0008198; F:GO:0005198; F:GO:0051539; P:GO:0097428; F:GO:0051537; P:GO:0016226	C:mitochondrial matrix; F:ferrous iron binding; F:structural molecule activity; F:4 iron, 4 sulfur cluster binding; P:protein maturation by iron-sulfur cluster transfer; F:2 iron, 2 sulfur cluster binding; P:iron-sulfur cluster assembly
Les.1049.1.S1_at	101259455	LOC101259455	secretory carrier-associated membrane protein 3-like	XM_004243275	Solyc07g054490.2.1																			1.87238e-05	0.296407	-3.37374	0.000923691	0.418231	-2.39102	P:GO:0015031; C:GO:0016021	P:protein transport; C:integral component of membrane
Les.1054.1.S1_at	101262954	LOC101262954	selenocysteine methyltransferase-like	XM_004247140	Solyc09g065520.2.1										0.0268932	0.349919	-2.85781										0.00903996	0.476968	-2.09657	P:GO:0009086; P:GO:0033528; F:GO:0008898; P:GO:0032259	P:methionine biosynthetic process; P:S-methylmethionine cycle; F:S-adenosylmethionine-homocysteine S-methyltransferase activity; P:methylation
Les.1058.1.S1_at	101250012	LOC101250012	squalene monooxygenase	XR_182686	Solyc04g077440.2.1																0.000662454	0.434287	-2.30262	2.95462e-05	2.80639	2.80639				F:GO:0004506; F:GO:0050660; C:GO:0016021; P:GO:0055114; P:GO:0006694; P:GO:0016114	F:squalene monooxygenase activity; F:flavin adenine dinucleotide binding; C:integral component of membrane; P:oxidation-reduction process; P:steroid biosynthetic process; P:terpenoid biosynthetic process	EC:1.14.13.132; EC:1.14.13	Acting on paired donors, with incorporation or reduction of molecular oxygen. The oxygen incorporated need not be derived from O(2); Acting on paired donors, with incorporation or reduction of molecular oxygen. The oxygen incorporated need not be derived from O(2)
Les.1061.1.A1_at	---	---	long-chain acyl-CoA synthetase 7	---	Solyc09g058980.2.1	0.044072	0.434404	-2.30201													0.0291292	2.38985	2.38985	0.0175159	0.407829	-2.45201
Les.1068.1.S1_at	543947	MKK3	MAPKK	NM_001247662	Solyc03g119490.2.1																			0.0230299	0.301791	-3.31355				F:GO:0005524; P:GO:0000165; P:GO:0000187; F:GO:0004702; F:GO:0005515; F:GO:0004708; P:GO:0007112; P:GO:0007178; P:GO:0009069; C:GO:0009524; P:GO:0010311	F:ATP binding; P:MAPK cascade; P:activation of MAPK activity; F:signal transducer, downstream of receptor, with serine/threonine kinase activity; F:protein binding; F:MAP kinase kinase activity; P:male meiosis cytokinesis; P:transmembrane receptor protein serine/threonine kinase signaling pathway; P:serine family amino acid metabolic process; C:phragmoplast; P:lateral root formation	EC:2.7.11; EC:2.7.12.1	Transferring phosphorus-containing groups; Dual-specificity kinase
Les.1069.1.A1_at	101259796	LOC101259796	actin-depolymerizing factor 1-like	XM_004249480	Solyc10g084660.1.1																						0.0166484	0.376587	-2.65543	F:GO:0003779; P:GO:0030042; C:GO:0015629; C:GO:0005622	F:actin binding; P:actin filament depolymerization; C:actin cytoskeleton; C:intracellular
Les.107.1.S1_at	543745	CycA2	cyclin A2	NM_001246839	Solyc06g065680.2.1																						0.00804252	0.239489	-4.17555	C:GO:0005634	C:nucleus
Les.1072.1.A1_at	101266437	LOC101266437	LRR receptor-like serine/threonine-protein kinase ERECTA-like	XM_004244995	Solyc08g061560.2.1																			0.0358478	0.410223	-2.4377	0.00024639	0.170123	-5.8781	P:GO:1905421; F:GO:0042277; P:GO:0006468; F:GO:0000166; F:GO:0005524; P:GO:0051302; P:GO:0001944; P:GO:0016310; P:GO:0050832; P:GO:0048281; F:GO:0004672; P:GO:0009664; P:GO:0009069; F:GO:0004674; P:GO:0009944; P:GO:0042742; P:GO:0009965; P:GO:0070370; P:GO:0001558; C:GO:0016020; C:GO:0005739; C:GO:0016021; P:GO:0010148; P:GO:0030155; F:GO:0016740; F:GO:0016301; P:GO:0010103	P:regulation of plant organ morphogenesis; F:peptide binding; P:protein phosphorylation; F:nucleotide binding; F:ATP binding; P:regulation of cell division; P:vasculature development; P:phosphorylation; P:defense response to fungus; P:inflorescence morphogenesis; F:protein kinase activity; P:plant-type cell wall organization; P:serine family amino acid metabolic process; F:protein serine/threonin…	EC:2.7.11	Transferring phosphorus-containing groups
Les.1076.1.A1_at	101244851	LOC101244851	U-box domain-containing protein 4-like	XM_004252801	Solyc12g100000.1.1																						0.0128283	2.87937	2.87937	C:GO:0005634; F:GO:0004842; C:GO:0005737; F:GO:0016740; P:GO:0016567	C:nucleus; F:ubiquitin-protein transferase activity; C:cytoplasm; F:transferase activity; P:protein ubiquitination
Les.1077.1.S1_at	101251740	LOC101251740	uncharacterized LOC101251740	XM_004232835	Solyc02g078150.2.1										0.0104679	0.093568	-10.6874										0.00956131	0.0867004	-11.534
Les.1079.2.S1_at	101244365	LOC101244365	GDSL esterase/lipase At5g33370-like	XM_004237455 /// XM_004237456	Solyc04g050730.2.1																0.0286402	0.170288	-5.87241				0.00233336	0.084094	-11.8914	F:GO:0016788	F:hydrolase activity, acting on ester bonds
Les.1081.1.S1_at	101244799	LOC101244799	NHP2-like protein 1-like	XM_004246345	Solyc09g011420.2.1	2.64686e-05	3.76562	3.76562										0.000938192	2.35553	2.35553										C:GO:0031428; C:GO:0032040; F:GO:0003723; P:GO:0000470; P:GO:0030490; C:GO:0071011; C:GO:0046540; C:GO:0022625; P:GO:0000398; P:GO:0006412	C:box C/D snoRNP complex; C:small-subunit processome; F:RNA binding; P:maturation of LSU-rRNA; P:maturation of SSU-rRNA; C:precatalytic spliceosome; C:U4/U6 x U5 tri-snRNP complex; C:cytosolic large ribosomal subunit; P:mRNA splicing, via spliceosome; P:translation
Les.1081.3.A1_at	101267649	LOC101267649	NHP2-like protein 1-like	XM_004247818	Solyc09g092080.2.1	0.00901173	2.74799	2.74799																						C:GO:0031428; C:GO:0032040; F:GO:0003723; P:GO:0000470; C:GO:0030529; P:GO:0030490; C:GO:0071011; C:GO:0046540; P:GO:0042254; C:GO:0005730; P:GO:0000398	C:box C/D snoRNP complex; C:small-subunit processome; F:RNA binding; P:maturation of LSU-rRNA; C:intracellular ribonucleoprotein complex; P:maturation of SSU-rRNA; C:precatalytic spliceosome; C:U4/U6 x U5 tri-snRNP complex; P:ribosome biogenesis; C:nucleolus; P:mRNA splicing, via spliceosome
Les.1082.1.S1_at	104646031	LOC104646031	uncharacterized LOC104646031	XM_010319024	Solyc02g078220.1.1																						0.0321119	2.46959	2.46959	C:GO:0005802; C:GO:0009507; C:GO:0005768; C:GO:0016021	C:trans-Golgi network; C:chloroplast; C:endosome; C:integral component of membrane
Les.1087.1.A1_at	101250397	LOC101250397	uncharacterized LOC101250397	XM_004237849	Solyc04g072940.2.1																			0.000140208	0.204922	-4.8799	0.0101437	0.372746	-2.68279
Les.1092.3.S1_at	101258447	LOC101258447	nucleoporin NUP53-like	XM_004235605	Solyc03g120880.2.1																0.0239157	0.349646	-2.86003							F:GO:0000166; C:GO:0031965; P:GO:0055085; P:GO:0015031; P:GO:0051028; C:GO:0005643	F:nucleotide binding; C:nuclear membrane; P:transmembrane transport; P:protein transport; P:mRNA transport; C:nuclear pore
Les.1097.1.A1_at	101248210	LOC101248210	4-coumarate--CoA ligase 2-like	XM_004241599	Solyc06g068650.2.1																0.00457547	2.91578	2.91578				0.0103831	2.47033	2.47033	F:GO:0003824; P:GO:0008152	F:catalytic activity; P:metabolic process
Les.11.1.S1_at	778276	SNF1	SNF1 protein	NM_001247036	Solyc02g067030.2.1																0.011053	2.28631	2.28631							P:GO:0018108; P:GO:0009594; P:GO:0010260; P:GO:0080022; P:GO:0010050; P:GO:0010182; F:GO:0004683; P:GO:0009069; C:GO:0005634; F:GO:0005524; P:GO:0003006; F:GO:0004713; P:GO:0009738; C:GO:0005737; P:GO:0035556	P:peptidyl-tyrosine phosphorylation; P:detection of nutrient; P:animal organ senescence; P:primary root development; P:vegetative phase change; P:sugar mediated signaling pathway; F:calmodulin-dependent protein kinase activity; P:serine family amino acid metabolic process; C:nucleus; F:ATP binding; P:developmental process involved in reproduction; F:protein tyrosine kinase activity; P:abscisic ac…	EC:2.7.10; EC:2.7.11; EC:2.7.11.17	Transferring phosphorus-containing groups; Transferring phosphorus-containing groups; Calcium/calmodulin-dependent protein kinase
Les.1100.1.A1_at	101253239	LOC101253239	myosin-J heavy chain-like	XM_004231474	Solyc02g020910.2.1																						0.00390954	2.06516	2.06516	F:GO:0000166; F:GO:0005524; C:GO:0016459; F:GO:0003774	F:nucleotide binding; F:ATP binding; C:myosin complex; F:motor activity	EC:3.6.1.15	Nucleoside-triphosphate phosphatase
Les.1101.1.A1_at	101251972	LOC101251972	uncharacterized LOC101251972	XM_004236753	---																0.00975442	3.56262	3.56262				0.00775675	3.49818	3.49818
Les.1108.1.A1_at	101268242	LOC101268242	protein trichome birefringence-like 36	XM_004249919	Solyc11g006990.1.1										0.000132905	2.6895	2.6895										0.00389169	2.01986	2.01986	P:GO:0042967; C:GO:0005794; P:GO:0071554; F:GO:0016413	P:acyl-carrier-protein biosynthetic process; C:Golgi apparatus; P:cell wall organization or biogenesis; F:O-acetyltransferase activity
Les.111.1.S1_at	543610	TBG7	beta-galactosidase	NM_001247378	Solyc03g019890.2.1																0.00887096	0.185368	-5.39467	0.00317097	0.162264	-6.16278	0.000380078	0.0962367	-10.391	P:GO:0046486; C:GO:0009341; P:GO:0006012; C:GO:0009505; F:GO:0030246; C:GO:0005773; F:GO:0004565; P:GO:0006027; P:GO:0006687	P:glycerolipid metabolic process; C:beta-galactosidase complex; P:galactose metabolic process; C:plant-type cell wall; F:carbohydrate binding; C:vacuole; F:beta-galactosidase activity; P:glycosaminoglycan catabolic process; P:glycosphingolipid metabolic process	EC:3.2.1.23	Beta-galactosidase
Les.1111.1.A1_at	101268820	LOC101268820	phenylalanine--tRNA ligase alpha subunit, cytoplasmic-like	XM_004231983	Solyc02g090860.2.1																0.0210855	2.08368	2.08368							F:GO:0000166; F:GO:0005524; F:GO:0004812; P:GO:0009094; P:GO:0000162; C:GO:0005737; P:GO:0006571; F:GO:0004826; P:GO:0006432; F:GO:0000049; C:GO:0009328	F:nucleotide binding; F:ATP binding; F:aminoacyl-tRNA ligase activity; P:L-phenylalanine biosynthetic process; P:tryptophan biosynthetic process; C:cytoplasm; P:tyrosine biosynthetic process; F:phenylalanine-tRNA ligase activity; P:phenylalanyl-tRNA aminoacylation; F:tRNA binding; C:phenylalanine-tRNA ligase complex	EC:6.1.1.20	Phenylalanine--tRNA ligase
Les.1114.1.A1_at	101249347	LOC101249347	E3 ubiquitin-protein ligase RKP-like	XM_004237392	Solyc04g054140.2.1																						0.0257032	2.24183	2.24183	C:GO:0000151; F:GO:0034450; P:GO:0051726; P:GO:0009615; P:GO:0051603; P:GO:0006511; P:GO:0016567	C:ubiquitin ligase complex; F:ubiquitin-ubiquitin ligase activity; P:regulation of cell cycle; P:response to virus; P:proteolysis involved in cellular protein catabolic process; P:ubiquitin-dependent protein catabolic process; P:protein ubiquitination
Les.112.1.S1_at	544162	ZEP	zeaxanthin epoxidase, chloroplastic	XM_004231981	Solyc02g090890.2.1																2.29669e-09	0.211626	-4.72531				1.63456e-05	0.431484	-2.31758	F:GO:0071949; F:GO:0052663; P:GO:0009408; F:GO:0009540; F:GO:0052662; C:GO:0031969; P:GO:0044550; P:GO:0009688; P:GO:0055114; P:GO:0016123; C:GO:0009535; P:GO:0009414	F:FAD binding; F:antheraxanthin epoxidase activity; P:response to heat; F:zeaxanthin epoxidase [overall] activity; F:zeaxanthin epoxidase activity; C:chloroplast membrane; P:secondary metabolite biosynthetic process; P:abscisic acid biosynthetic process; P:oxidation-reduction process; P:xanthophyll biosynthetic process; C:chloroplast thylakoid membrane; P:response to water deprivation	EC:1.14.13.90; EC:1.14.13	Zeaxanthin epoxidase; Acting on paired donors, with incorporation or reduction of molecular oxygen. The oxygen incorporated need not be derived from O(2)
Les.1121.1.S1_at	101265367	LOC101265367	BI1-like protein-like	XM_004247281	Solyc09g065610.1.1																0.007803	2.08892	2.08892							C:GO:0016021	C:integral component of membrane
Les.1123.1.A1_at	101247740	LOC101247740	ABC transporter B family member 2-like	XM_004245861	Solyc08g076720.2.1										0.0042135	2.08367	2.08367													F:GO:0016887; F:GO:0000166; F:GO:0005524; F:GO:0042626; P:GO:0055085; C:GO:0016020; C:GO:0016021; P:GO:0006810	F:ATPase activity; F:nucleotide binding; F:ATP binding; F:ATPase activity, coupled to transmembrane movement of substances; P:transmembrane transport; C:membrane; C:integral component of membrane; P:transport	EC:3.6.1.3; EC:3.6.1.15	Adenosinetriphosphatase; Nucleoside-triphosphate phosphatase
Les.113.1.S1_at	104646577	LOC104646577	uncharacterized LOC104646577	XM_010320483	Solyc03g116510.1.1																0.0121839	5.45586	5.45586				0.000537975	10.9464	10.9464
Les.1131.1.S1_at	101263686	LOC101263686	nucleosome assembly protein 1-like 1-like	XM_004235539 /// XM_004235540	Solyc03g121700.2.1																0.00044768	2.49761	2.49761				0.00193572	2.10388	2.10388	C:GO:0005634; C:GO:0005737; P:GO:0006334	C:nucleus; C:cytoplasm; P:nucleosome assembly
Les.1135.1.A1_at	101254340	LOC101254340	probable Xaa-Pro aminopeptidase 3	XM_004230276	Solyc01g100740.2.1																0.000347332	4.26507	4.26507							F:GO:0046872; P:GO:0006508; C:GO:0005739; F:GO:0030145; F:GO:0004177; F:GO:0008233; P:GO:0050821; F:GO:0016787	F:metal ion binding; P:proteolysis; C:mitochondrion; F:manganese ion binding; F:aminopeptidase activity; F:peptidase activity; P:protein stabilization; F:hydrolase activity	EC:3.4.11	Acting on peptide bonds (peptidases)
Les.1138.1.A1_at	---	---	Unknown Protein	---	Solyc03g098750.2.1																						0.0223119	2.88723	2.88723
Les.1139.1.A1_at	101263192	LOC101263192	DEAD-box ATP-dependent RNA helicase 37-like	XM_004234708	Solyc03g052980.2.1																0.0356317	2.01835	2.01835							F:GO:0003676; F:GO:0005524; C:GO:0005737; P:GO:0010501; C:GO:0005730; F:GO:0004004	F:nucleic acid binding; F:ATP binding; C:cytoplasm; P:RNA secondary structure unwinding; C:nucleolus; F:ATP-dependent RNA helicase activity	EC:3.6.1.3; EC:3.6.1.15	Adenosinetriphosphatase; Nucleoside-triphosphate phosphatase
Les.1155.1.S1_at	101259199	LOC101259199	CBS domain-containing protein CBSX1, chloroplastic-like	XM_004230714 /// XM_004230715	Solyc01g107860.2.1																0.00511783	2.14494	2.14494							C:GO:0009570; C:GO:0009507; P:GO:0045454	C:chloroplast stroma; C:chloroplast; P:cell redox homeostasis
Les.1156.1.A1_at	101245307	LOC101245307	uncharacterized LOC101245307	XM_004249348	---																						0.000340711	2.32643	2.32643
Les.1157.1.A1_at	101262188	LOC101262188	beta-glucuronosyltransferase GlcAT14A-like	XM_010315597	Solyc12g013850.1.1																						0.000262238	2.50389	2.50389	F:GO:0008375; C:GO:0016020; C:GO:0016021	F:acetylglucosaminyltransferase activity; C:membrane; C:integral component of membrane
Les.1159.2.A1_at	101258782	LOC101258782	uncharacterized LOC101258782	XM_004229620	Solyc01g087880.2.1	0.0122311	2.22819	2.22819													0.00477828	2.41257	2.41257
Les.1163.1.A1_at	101266671	LOC101266671	trihelix transcription factor ASIL2	XM_004229982	Solyc01g096470.2.1																			0.000495768	2.53732	2.53732
Les.1169.2.S1_at	101260924	LOC101260924	uncharacterized LOC101260924	XM_004236700	Solyc04g011530.2.1																			0.0379621	0.361978	-2.7626
Les.1170.1.A1_at	101253169	LOC101253169	clathrin interactor EPSIN 2-like	XM_004252916	---																0.0228927	2.01288	2.01288
Les.1172.1.A1_at	101261378	LOC101261378	probable S-acyltransferase At3g26935-like	XM_004231707	Solyc02g094390.2.1																			0.00018269	0.331004	-3.02111				F:GO:0008270; F:GO:0019706; P:GO:0042967; C:GO:0016021	F:zinc ion binding; F:protein-cysteine S-palmitoyltransferase activity; P:acyl-carrier-protein biosynthetic process; C:integral component of membrane	EC:2.3.1.225	Protein S-acyltransferase
Les.1174.1.S1_at	101252285	LOC101252285	DAG protein, chloroplastic-like	XM_004239703	Solyc05g054960.2.1	3.70223e-05	2.64867	2.64867										0.000402582	2.02436	2.02436										C:GO:0005739	C:mitochondrion
Les.1175.1.S1_at	101252465	LOC101252465	uncharacterized LOC101252465	XM_004234351	Solyc03g025670.2.1																			0.00973392	5.62079	5.62079	0.016894	3.94714	3.94714
Les.1175.3.A1_at	101252153	LOC101252153	uncharacterized LOC101252153	XM_004234350	Solyc03g025680.2.1				0.0123921	0.20217	-4.94634	0.0431286	0.301449	-3.31731
Les.1179.1.A1_at	101250066	LOC101250066	rop guanine nucleotide exchange factor 7	XM_004249533	Solyc10g086660.1.1																						0.000301522	0.456109	-2.19246	F:GO:0005085; F:GO:0005089; P:GO:0043547	F:guanyl-nucleotide exchange factor activity; F:Rho guanyl-nucleotide exchange factor activity; P:positive regulation of GTPase activity
Les.1181.1.A1_at	101260747	LOC101260747	F-box/ankyrin repeat protein SKIP35-like	XM_004244737	Solyc08g015780.2.1																			6.11982e-06	2.34573	2.34573
Les.1186.1.A1_at	101253647	LOC101253647	isocitrate dehydrogenase [NAD] regulatory subunit 1, mitochondrial-like	XM_004232505	Solyc02g082860.2.1							0.0038417	2.903	2.903							7.71977e-05	5.35454	5.35454	0.00423125	2.8121	2.8121	0.000574259	3.76627	3.76627	F:GO:0004449; F:GO:0016616; P:GO:0006099; P:GO:0055114	F:isocitrate dehydrogenase (NAD+) activity; F:oxidoreductase activity, acting on the CH-OH group of donors, NAD or NADP as acceptor; P:tricarboxylic acid cycle; P:oxidation-reduction process	EC:1.1.1.41	Isocitrate dehydrogenase (NAD(+))
Les.1189.1.A1_at	101265973	LOC101265973	3-oxoacyl-[acyl-carrier-protein] reductase FabG-like	XM_004249081	Solyc10g078360.1.1																						0.0303347	5.54779	5.54779	F:GO:0016491; P:GO:0055114	F:oxidoreductase activity; P:oxidation-reduction process
Les.119.1.S1_at	543640	Aqp2	Aqp2 protein	NM_001247484	Solyc01g094690.2.1																0.00060074	0.125064	-7.9959	0.0066952	0.233465	-4.2833				C:GO:0005887; P:GO:0006833; C:GO:0009506; F:GO:0015254; P:GO:0009992; P:GO:0015793; P:GO:0034220; F:GO:0015250; C:GO:0005773	C:integral component of plasma membrane; P:water transport; C:plasmodesma; F:glycerol channel activity; P:cellular water homeostasis; P:glycerol transport; P:ion transmembrane transport; F:water channel activity; C:vacuole
Les.1192.2.S1_at	101261881	LOC101261881	uncharacterized LOC101261881	XM_004233611	Solyc02g089080.2.1																			0.000346751	0.474462	-2.10765	3.85235e-05	0.398192	-2.51135
Les.1197.2.A1_at	101261383	LOC101261383	lanC-like protein 2-like	XM_004250064	Solyc11g010170.1.1																0.0404881	2.22176	2.22176				0.00137321	3.58957	3.58957	P:GO:0007165; C:GO:0005886	P:signal transduction; C:plasma membrane
Les.1203.1.A1_at	101247092	LOC101247092	putative lipase YDR444W	XM_004232992	Solyc02g076870.2.1																						0.00970117	2.25466	2.25466	P:GO:0044255; F:GO:0052689	P:cellular lipid metabolic process; F:carboxylic ester hydrolase activity	EC:3.1.1.1	Carboxylesterase
Les.1207.3.S1_at	101055530	LOC101055530	Hop-interacting protein THI113	XM_004228339	Solyc01g010750.2.1																0.0358116	0.330721	-3.0237							C:GO:0005634; C:GO:0005737; F:GO:0030246	C:nucleus; C:cytoplasm; F:carbohydrate binding
Les.1211.1.A1_at	101254955	LOC101254955	uncharacterized LOC101254955	XM_004231337	---																			0.00516907	3.48892	3.48892	0.000273534	5.87751	5.87751
Les.1213.1.A1_at	101256298	LOC101256298	uncharacterized LOC101256298	XM_004241626	Solyc06g068540.2.1																0.0428988	2.6325	2.6325	0.00414575	3.8484	3.8484	0.00191919	4.52789	4.52789
Les.1217.1.S1_at	101257411	LOC101257411	protein RETICULATA-RELATED 1, chloroplastic-like	XM_004230457	Solyc01g104270.2.1																0.00837721	0.150856	-6.62883				0.00939208	0.170415	-5.86803	C:GO:0016021	C:integral component of membrane
Les.1219.1.A1_at	101251142	LOC101251142	probable salt tolerance-like protein At1g78600-like	XR_182464	Solyc02g084430.2.1																			4.02449e-07	55.2184	55.2184	1.74536e-05	23.0699	23.0699	C:GO:0005634; P:GO:0009640; F:GO:0000989; P:GO:0006355	C:nucleus; P:photomorphogenesis; F:transcription factor activity, transcription factor binding; P:regulation of transcription, DNA-templated
Les.122.1.S1_at	544149	CHI3	chitinase	NM_001247475	Solyc02g082920.2.1																0.000268389	29.2309	29.2309				0.00143069	14.927	14.927	F:GO:0004568; P:GO:0009607; P:GO:0016998; C:GO:0005615; P:GO:0000272; P:GO:0006032; P:GO:0006952	F:chitinase activity; P:response to biotic stimulus; P:cell wall macromolecule catabolic process; C:extracellular space; P:polysaccharide catabolic process; P:chitin catabolic process; P:defense response	EC:3.2.1.14	Chitinase
Les.1221.2.S1_at	101246256	LOC101246256	60S ribosomal protein L7a-2-like	XM_004241847	Solyc06g064470.2.1																0.0252474	0.17347	-5.76468				0.0268804	0.192564	-5.19307	P:GO:0042254; C:GO:0005840	P:ribosome biogenesis; C:ribosome
Les.1225.1.S1_at	101255627	LOC101255627	4,5-DOPA dioxygenase extradiol-like protein-like	XM_004229692	Solyc01g090180.2.1										0.0187743	0.390648	-2.55985							0.00150365	0.308806	-3.23828	0.000120475	0.214857	-4.65426	F:GO:0051213; P:GO:0006725; F:GO:0016701; F:GO:0008270; F:GO:0008198; P:GO:0055114	F:dioxygenase activity; P:cellular aromatic compound metabolic process; F:oxidoreductase activity, acting on single donors with incorporation of molecular oxygen; F:zinc ion binding; F:ferrous iron binding; P:oxidation-reduction process
Les.1226.1.S1_at	101246374	LOC101246374	putative ER lumen protein retaining receptor C28H8.4-like	XM_004247014	Solyc09g059270.2.1																			0.0489896	3.86752	3.86752				C:GO:0016021; C:GO:0005783; F:GO:0046923; P:GO:0006621	C:integral component of membrane; C:endoplasmic reticulum; F:ER retention sequence binding; P:protein retention in ER lumen
Les.123.1.S1_at	543814	LOC543814	uncharacterized LOC543814	NM_001247157	Solyc09g011630.2.1				0.0222243	4.25596	4.25596	0.00562427	5.58366	5.58366							4.9806e-08	116.569	116.569	0.0414934	3.2951	3.2951	2.25168e-05	20.0899	20.0899	P:GO:0006803; P:GO:0009407; C:GO:0005737; P:GO:0006749; F:GO:0004364; P:GO:0009734	P:obsolete glutathione conjugation reaction; P:toxin catabolic process; C:cytoplasm; P:glutathione metabolic process; F:glutathione transferase activity; P:auxin-activated signaling pathway	EC:2.5.1.18	Glutathione transferase
Les.1230.1.A1_at	101264282	LOC101264282	L-ascorbate peroxidase 3, peroxisomal-like	XM_004232456	Solyc02g083630.2.1																			7.03659e-05	0.13689	-7.30516				F:GO:0004130; P:GO:0000302; F:GO:0020037; P:GO:0042744; F:GO:0004601; P:GO:0006979; C:GO:0009507; P:GO:0006804; C:GO:0016020; P:GO:0098869; C:GO:0016021; P:GO:0034599; P:GO:0055114	F:cytochrome-c peroxidase activity; P:response to reactive oxygen species; F:heme binding; P:hydrogen peroxide catabolic process; F:peroxidase activity; P:response to oxidative stress; C:chloroplast; P:obsolete peroxidase reaction; C:membrane; P:cellular oxidant detoxification; C:integral component of membrane; P:cellular response to oxidative stress; P:oxidation-reduction process	EC:1.11.1.5; EC:1.11.1.7	Cytochrome-c peroxidase; Peroxidase
Les.1233.1.A1_at	101255684	LOC101255684	uncharacterized LOC101255684	XM_004237488	Solyc04g049620.2.1																0.00105526	4.46609	4.46609				0.000833454	4.31184	4.31184
Les.1235.1.A1_at	101254846	LOC101254846	probable protein phosphatase 2C 10-like	XM_004230533 /// XM_004230534	Solyc01g105280.2.1																						0.00452209	2.34454	2.34454	F:GO:0004722; C:GO:0008287; F:GO:0003824; P:GO:0006470	F:protein serine/threonine phosphatase activity; C:protein serine/threonine phosphatase complex; F:catalytic activity; P:protein dephosphorylation	EC:3.1.3.16; EC:3.1.3.41	Protein-serine/threonine phosphatase; 4-nitrophenylphosphatase
Les.1238.1.S1_at	101247116	LOC101247116	uncharacterized LOC101247116	XM_004235652	Solyc03g120310.2.1																0.0198941	2.03034	2.03034							C:GO:0016021; F:GO:0016740	C:integral component of membrane; F:transferase activity
Les.1243.1.A1_at	101248673	LOC101248673	uncharacterized LOC101248673	XM_004238608	---							0.0171442	2.24638	2.24638							0.0139044	2.41385	2.41385				0.00113025	3.23627	3.23627
Les.1248.2.S1_a_at	544308	GMP	GDP-mannose pyrophosphorylase /// GDP-mannose pyrophosphorylase	NM_001247096	Solyc03g096730.2.1																0.00262371	0.462808	-2.16072							F:GO:0008928; P:GO:0006013; P:GO:0006000; P:GO:0009058	F:mannose-1-phosphate guanylyltransferase (GDP) activity; P:mannose metabolic process; P:fructose metabolic process; P:biosynthetic process	EC:2.7.7.22	Mannose-1-phosphate guanylyltransferase (GDP)
Les.1249.1.S1_at	101262831	LOC101262831	uncharacterized LOC101262831	XM_004243693 /// XM_004243694	Solyc07g040950.2.1										0.0294488	0.465809	-2.1468				0.010158	0.373028	-2.68076				0.0111096	0.396308	-2.52329
Les.1250.1.S1_at	101246132	LOC101246132	thioredoxin Y1, chloroplastic-like	XM_004237754	Solyc04g071560.2.1																0.0369367	0.411006	-2.43305	0.0338023	0.428447	-2.33401	6.22276e-05	0.152721	-6.5479	P:GO:0006118; F:GO:0015035; C:GO:0005737; P:GO:0006662; F:GO:0016671; P:GO:0034599; P:GO:0045454; P:GO:0055114; P:GO:0006457; P:GO:0000103	P:obsolete electron transport; F:protein disulfide oxidoreductase activity; C:cytoplasm; P:glycerol ether metabolic process; F:oxidoreductase activity, acting on a sulfur group of donors, disulfide as acceptor; P:cellular response to oxidative stress; P:cell redox homeostasis; P:oxidation-reduction process; P:protein folding; P:sulfate assimilation
Les.1254.2.S1_at	101253385	LOC101253385	uncharacterized LOC101253385	XM_004240976 /// XM_004240977	Solyc06g053790.2.1																0.00803284	0.398509	-2.50936							C:GO:0016021; F:GO:0008289	C:integral component of membrane; F:lipid binding
Les.1258.1.S1_at	543874	GABA-TP2	gamma-aminobutyrate transaminase subunit precursor isozyme 2	NM_001247411	Solyc12g006470.1.1																						0.00124951	0.370742	-2.6973	F:GO:0030170; F:GO:0042802; C:GO:0005737; F:GO:0008483	F:pyridoxal phosphate binding; F:identical protein binding; C:cytoplasm; F:transaminase activity
Les.126.1.S1_at	543581	LOC543581	transcription factor bHLH113	XM_004244708	Solyc08g014120.2.1	0.00659188	3.11795	3.11795										0.0112173	2.55602	2.55602				0.0056096	2.83107	2.83107	0.00305854	3.15167	3.15167	F:GO:0001046; C:GO:0005634; P:GO:0006366; F:GO:0001228; F:GO:0046983; P:GO:0045944	F:core promoter sequence-specific DNA binding; C:nucleus; P:transcription from RNA polymerase II promoter; F:transcriptional activator activity, RNA polymerase II transcription regulatory region sequence-specific binding; F:protein dimerization activity; P:positive regulation of transcription from RNA polymerase II promoter
Les.1260.1.S1_at	101262821	LOC101262821	ATP synthase subunit b', chloroplastic-like	XM_004241731	Solyc06g066000.1.1																			1.06613e-05	0.485091	-2.06147	1.84713e-05	0.493519	-2.02626	F:GO:0015078; C:GO:0045263; C:GO:0016021; P:GO:0015986	F:hydrogen ion transmembrane transporter activity; C:proton-transporting ATP synthase complex, coupling factor F(o); C:integral component of membrane; P:ATP synthesis coupled proton transport
Les.1267.1.A1_at	101260951	LOC101260951	uncharacterized LOC101260951	XM_004242773	Solyc07g008840.2.1																			0.0012177	2.04663	2.04663	8.09298e-05	2.57882	2.57882	P:GO:0031338; P:GO:0090630; F:GO:0005096; C:GO:0012505; P:GO:0006886; F:GO:0017137; C:GO:0005622	P:regulation of vesicle fusion; P:activation of GTPase activity; F:GTPase activator activity; C:endomembrane system; P:intracellular protein transport; F:Rab GTPase binding; C:intracellular
Les.127.1.S1_at	543726	sbt3	subtilisin-like protease	NM_001247845	Solyc01g087850.2.1																0.000549377	3.39414	3.39414							C:GO:0005618; P:GO:0006508; F:GO:0004252	C:cell wall; P:proteolysis; F:serine-type endopeptidase activity	EC:3.4.21	Acting on peptide bonds (peptidases)
Les.1271.1.A1_at	101251832	LOC101251832	thylakoid membrane protein TERC, chloroplastic	XM_004249539	Solyc10g085980.1.1																			0.0110392	0.425421	-2.35061				C:GO:0016020; C:GO:0016021; P:GO:0090351; C:GO:0009534; P:GO:0010027; C:GO:0009535	C:membrane; C:integral component of membrane; P:seedling development; C:chloroplast thylakoid; P:thylakoid membrane organization; C:chloroplast thylakoid membrane
Les.128.1.S1_at	544215	ER49	ethylene-responsive elongation factor EF-Ts precursor	NM_001247716	Solyc12g011270.1.1																0.00418727	2.86892	2.86892				0.0045538	2.69692	2.69692	P:GO:0006448; F:GO:0003746; C:GO:0005759; C:GO:0005739; P:GO:0070125; C:GO:0005840; P:GO:0006412	P:regulation of translational elongation; F:translation elongation factor activity; C:mitochondrial matrix; C:mitochondrion; P:mitochondrial translational elongation; C:ribosome; P:translation
Les.1287.2.S1_at	101244894	LOC101244894	uncharacterized LOC101244894	XM_004245851	Solyc08g076880.2.1				0.0427771	2.67193	2.67193
Les.1288.1.S1_at	543930	LOC543930	uncharacterized LOC543930	NM_001247595	Solyc01g096660.2.1																0.000666305	0.464907	-2.15097				9.43048e-05	0.416169	-2.40287	P:GO:0009735; C:GO:0009535	P:response to cytokinin; C:chloroplast thylakoid membrane
Les.129.1.S1_at	543675	DES	divinyl ether synthase	NM_001247598	Solyc01g109140.2.1																0.000171148	21.5485	21.5485				3.69268e-05	27.9785	27.9785	F:GO:0005506; F:GO:0016705; F:GO:0047987; C:GO:0005829; P:GO:0055114; F:GO:0004497; P:GO:0016125; F:GO:0020037	F:iron ion binding; F:oxidoreductase activity, acting on paired donors, with incorporation or reduction of molecular oxygen; F:hydroperoxide dehydratase activity; C:cytosol; P:oxidation-reduction process; F:monooxygenase activity; P:sterol metabolic process; F:heme binding	EC:4.2.1.92	Hydroperoxide dehydratase
Les.1296.1.A1_at	101248861	LOC101248861	disease resistance RPP8-like protein 3-like	XM_004253072	---																0.00187788	3.95334	3.95334				0.00337538	3.3788	3.3788
Les.1297.2.A1_at	100736514	Bti9	LysM receptor-like kinase	NM_001246844	Solyc07g049180.2.1																0.0151424	2.40359	2.40359				0.00200853	3.03484	3.03484	F:GO:0005524; C:GO:0016020; C:GO:0016021; P:GO:0007166; F:GO:0004672; P:GO:0007178; P:GO:0016310; P:GO:0009069; P:GO:0006468; F:GO:0016301; C:GO:0005886; F:GO:0004675	F:ATP binding; C:membrane; C:integral component of membrane; P:cell surface receptor signaling pathway; F:protein kinase activity; P:transmembrane receptor protein serine/threonine kinase signaling pathway; P:phosphorylation; P:serine family amino acid metabolic process; P:protein phosphorylation; F:kinase activity; C:plasma membrane; F:transmembrane receptor protein serine/threonine kinase activ…	EC:2.7.11	Transferring phosphorus-containing groups
Les.13.1.S1_at	606711	aos	allene oxide synthase	NM_001247904	Solyc04g079730.1.1																						0.019287	2.76217	2.76217	P:GO:0009695; F:GO:0005506; F:GO:0016705; P:GO:0031408; C:GO:0009941; F:GO:0047987; P:GO:0055114; P:GO:0006952; F:GO:0004497; P:GO:0016125; C:GO:0009535; F:GO:0020037	P:jasmonic acid biosynthetic process; F:iron ion binding; F:oxidoreductase activity, acting on paired donors, with incorporation or reduction of molecular oxygen; P:oxylipin biosynthetic process; C:chloroplast envelope; F:hydroperoxide dehydratase activity; P:oxidation-reduction process; P:defense response; F:monooxygenase activity; P:sterol metabolic process; C:chloroplast thylakoid membrane; F:…	EC:4.2.1.92	Hydroperoxide dehydratase
Les.1302.1.A1_at	101250240	LOC101250240	BTB/POZ domain-containing protein At1g63850-like	XM_004245530	Solyc08g081390.2.1				0.025333	0.413333	-2.41935										0.0306897	0.427243	-2.34059	0.00407188	0.331418	-3.01734				F:GO:0003824; P:GO:0008152; F:GO:0016791; C:GO:0005829; P:GO:0016311	F:catalytic activity; P:metabolic process; F:phosphatase activity; C:cytosol; P:dephosphorylation	EC:3.1.3.41	4-nitrophenylphosphatase
Les.1304.2.S1_at	101055562	BBR/BPC1	GAGA-binding transcriptional activator	XM_004236858 /// XM_004236859	Solyc04g008380.2.1																0.00700121	0.179572	-5.56881				0.0314114	0.282715	-3.53713	C:GO:0005634; C:GO:0005667; F:GO:0003700; P:GO:0006355; F:GO:0043565; P:GO:0006355; P:GO:0009723	C:nucleus; C:transcription factor complex; F:transcription factor activity, sequence-specific DNA binding; P:regulation of transcription, DNA-templated; F:sequence-specific DNA binding; P:regulation of transcription, DNA-templated; P:response to ethylene
Les.1308.1.A1_at	101258940	LOC101258940	NAD-dependent protein deacetylase SRT2-like	XM_004236776	Solyc04g009430.2.1																						0.0450181	2.30683	2.30683	C:GO:0005634; F:GO:0008270; F:GO:0034979; P:GO:0006471; F:GO:0046872; C:GO:0005759; C:GO:0005739; P:GO:0006476; P:GO:0031348; P:GO:0042742; F:GO:0070403; F:GO:0016787	C:nucleus; F:zinc ion binding; F:NAD-dependent protein deacetylase activity; P:protein ADP-ribosylation; F:metal ion binding; C:mitochondrial matrix; C:mitochondrion; P:protein deacetylation; P:negative regulation of defense response; P:defense response to bacterium; F:NAD+ binding; F:hydrolase activity
Les.131.1.S1_at	543813	LOC543813	uncharacterized LOC543813	NM_001247153	Solyc01g086680.2.1																0.0135299	3.71242	3.71242				0.00032136	7.24477	7.24477	P:GO:0006803; P:GO:0009407; C:GO:0005737; P:GO:0006749; F:GO:0004364	P:obsolete glutathione conjugation reaction; P:toxin catabolic process; C:cytoplasm; P:glutathione metabolic process; F:glutathione transferase activity	EC:2.5.1.18	Glutathione transferase
Les.1310.1.S1_at	101259777	LOC101259777	granule-bound starch synthase 1, chloroplastic/amyloplastic-like	XM_004245395	Solyc08g083320.2.1																0.00131078	0.440845	-2.26837							P:GO:0019252; C:GO:0009501; F:GO:0004373; F:GO:0033840; C:GO:0009569; P:GO:0005985	P:starch biosynthetic process; C:amyloplast; F:glycogen (starch) synthase activity; F:NDP-glucose-starch glucosyltransferase activity; C:chloroplast starch grain; P:sucrose metabolic process	EC:2.4.1.11; EC:2.4.1.242	Glycogen(starch) synthase; NDP-glucose--starch glucosyltransferase
Les.1311.1.A1_at	101243653	LOC101243653	WD repeat-containing protein 43	XM_004231522	Solyc02g030080.2.1																0.00165249	5.11364	5.11364							C:GO:0005634; P:GO:0006364; C:GO:0005730	C:nucleus; P:rRNA processing; C:nucleolus
Les.1314.1.S1_at	101255972	LOC101255972	protein REVEILLE 7	XM_004235342 /// XM_004235343	Solyc03g098320.2.1																0.0420418	0.345117	-2.89757	3.66117e-05	10.744	10.744				C:GO:0005634; F:GO:0003677; P:GO:0006351; P:GO:0006355	C:nucleus; F:DNA binding; P:transcription, DNA-templated; P:regulation of transcription, DNA-templated
Les.1315.1.S1_at	104644365	LOC104644365	zinc finger BED domain-containing protein DAYSLEEPER-like	XM_010313822	Solyc10g080090.1.1																			0.000182845	0.400313	-2.49804				C:GO:0005634; C:GO:0005667; F:GO:0003700; F:GO:0000977; F:GO:0046983; P:GO:0006355; P:GO:0006357	C:nucleus; C:transcription factor complex; F:transcription factor activity, sequence-specific DNA binding; F:RNA polymerase II regulatory region sequence-specific DNA binding; F:protein dimerization activity; P:regulation of transcription, DNA-templated; P:regulation of transcription from RNA polymerase II promoter
Les.1316.1.A1_at	101250713	LOC101250713	uncharacterized LOC101250713	XM_004244252 /// XM_004244253	Solyc07g062110.2.1																0.0159521	2.61105	2.61105				0.0334536	2.21186	2.21186
Les.132.1.S1_at	544285	ACO4	ethylene-forming enzyme	NM_001246999	Solyc07g049550.2.1				0.0268353	2.55137	2.55137	0.0160472	2.66521	2.66521							2.54872e-06	11.9325	11.9325				0.0109221	2.84276	2.84276	F:GO:0051213; F:GO:0031418; F:GO:0009815; F:GO:0005506; P:GO:0009693; P:GO:0055114; P:GO:0009835	F:dioxygenase activity; F:L-ascorbic acid binding; F:1-aminocyclopropane-1-carboxylate oxidase activity; F:iron ion binding; P:ethylene biosynthetic process; P:oxidation-reduction process; P:fruit ripening	EC:1.14.17.4	Aminocyclopropanecarboxylate oxidase
Les.1320.1.A1_at	101244136	LOC101244136	uncharacterized LOC101244136	XM_004249430	---																			0.01031	3.16718	3.16718	0.0155416	2.99481	2.99481
Les.1321.1.S1_at	101251216	LOC101251216	uncharacterized LOC101251216	XM_004246624	Solyc09g007530.2.1																						0.00531734	2.0432	2.0432	F:GO:0008270	F:zinc ion binding
Les.1323.1.S1_at	101244648	LOC101244648	50S ribosomal protein L29, chloroplastic-like	XM_004235308	Solyc03g097950.2.1																0.00692705	0.328076	-3.04807	0.00775769	0.358671	-2.78807	0.000120054	0.1901	-5.26039	F:GO:0003735; P:GO:0042254; C:GO:0022625; P:GO:0006412	F:structural constituent of ribosome; P:ribosome biogenesis; C:cytosolic large ribosomal subunit; P:translation
Les.1324.1.S1_at	101259460	LOC101259460	GTP-dependent nucleic acid-binding protein EngD-like	XM_004243939	Solyc07g066430.2.1																			1.98022e-05	0.456369	-2.19121				C:GO:0009570; F:GO:0005525; F:GO:0016887; F:GO:0005524; F:GO:0043022; F:GO:0043023	C:chloroplast stroma; F:GTP binding; F:ATPase activity; F:ATP binding; F:ribosome binding; F:ribosomal large subunit binding	EC:3.6.1.3; EC:3.6.1.15	Adenosinetriphosphatase; Nucleoside-triphosphate phosphatase
Les.1328.1.A1_at	101251707	LOC101251707	putative disease resistance protein RGA4-like	XM_004245875	Solyc08g076000.2.1																0.0114269	2.8925	2.8925				0.0146744	2.63871	2.63871	F:GO:0005524; F:GO:0043531; P:GO:0006952	F:ATP binding; F:ADP binding; P:defense response
Les.1334.1.A1_at	101250760	LOC101250760	rust resistance kinase Lr10-like	XM_004249945	Solyc11g007400.1.1							0.00317241	4.23032	4.23032	0.0252379	2.79404	2.79404				0.000235719	7.43285	7.43285	0.000225806	6.57899	6.57899	0.000343585	6.31177	6.31177
Les.1338.1.A1_at	101264494	LOC101264494	probable inactive tRNA-specific adenosine deaminase-like protein 3	XM_004234391	Solyc03g026090.2.1	0.00471318	2.59015	2.59015										0.0127651	2.08328	2.08328										P:GO:0006869; C:GO:0016020; F:GO:0008289	P:lipid transport; C:membrane; F:lipid binding
Les.1348.1.A1_at	101255228	LOC101255228	myb-like protein D	XM_004245800	Solyc08g077480.2.1										0.0344736	2.0754	2.0754
Les.1349.1.A1_at	101243929	LOC101243929	ADP,ATP carrier protein, mitochondrial-like	XM_004229572	Solyc01g087070.2.1																0.00940405	4.38191	4.38191	0.00240184	5.2863	5.2863	0.000501691	7.49595	7.49595	P:GO:0055085; F:GO:0005471; C:GO:0016020; C:GO:0016021; P:GO:0015867; P:GO:0006810; P:GO:0046902; P:GO:0015866; F:GO:0005215; C:GO:0005743	P:transmembrane transport; F:ATP:ADP antiporter activity; C:membrane; C:integral component of membrane; P:ATP transport; P:transport; P:regulation of mitochondrial membrane permeability; P:ADP transport; F:transporter activity; C:mitochondrial inner membrane
Les.1352.1.A1_at	101246150	LOC101246150	probable serine/threonine protein kinase IREH1	XM_004241592	Solyc06g068920.2.1																0.0278878	2.22263	2.22263				0.0106168	2.46393	2.46393	F:GO:0000166; F:GO:0005524; F:GO:0004672; P:GO:0016310; P:GO:0009069; P:GO:0018105; P:GO:0006468; F:GO:0004674; F:GO:0016740; F:GO:0016301; C:GO:0005622; P:GO:0035556	F:nucleotide binding; F:ATP binding; F:protein kinase activity; P:phosphorylation; P:serine family amino acid metabolic process; P:peptidyl-serine phosphorylation; P:protein phosphorylation; F:protein serine/threonine kinase activity; F:transferase activity; F:kinase activity; C:intracellular; P:intracellular signal transduction	EC:2.7.11	Transferring phosphorus-containing groups
Les.1360.2.A1_at	101055527	LOC101055527	Hop-interacting protein THI080	XM_004236133	Solyc03g113390.2.1										0.0346699	2.26808	2.26808				0.00507748	3.35395	3.35395	0.047889	2.14264	2.14264	0.000122683	5.59597	5.59597	P:GO:0046777; F:GO:0004683; P:GO:0009069; C:GO:0005886; F:GO:0009931; C:GO:0005634; F:GO:0005524; F:GO:0005516; P:GO:0009738; C:GO:0005737; F:GO:0005509; P:GO:0018105; P:GO:0035556	P:protein autophosphorylation; F:calmodulin-dependent protein kinase activity; P:serine family amino acid metabolic process; C:plasma membrane; F:calcium-dependent protein serine/threonine kinase activity; C:nucleus; F:ATP binding; F:calmodulin binding; P:abscisic acid-activated signaling pathway; C:cytoplasm; F:calcium ion binding; P:peptidyl-serine phosphorylation; P:intracellular signal transd…	EC:2.7.11; EC:2.7.11.17	Transferring phosphorus-containing groups; Calcium/calmodulin-dependent protein kinase
Les.1369.1.A1_at	101244822	LOC101244822	uncharacterized LOC101244822	XM_004249514	Solyc10g086430.1.1										0.00234119	4.51408	4.51408										0.00990391	3.52203	3.52203
Les.137.1.S1_at	543970	LOC543970	chorimate mutase	NM_001247779	Solyc11g017240.1.1																						0.000451048	2.20459	2.20459	F:GO:0004106; P:GO:0009094; P:GO:0000162; P:GO:0006571; P:GO:0046417	F:chorismate mutase activity; P:L-phenylalanine biosynthetic process; P:tryptophan biosynthetic process; P:tyrosine biosynthetic process; P:chorismate metabolic process	EC:5.4.99.5	Chorismate mutase
Les.1371.1.A1_at	101259597	LOC101259597	formin-like protein 6-like	XM_004231868	Solyc02g092470.2.1																0.0101108	3.49901	3.49901							C:GO:0016021	C:integral component of membrane
Les.1374.1.A1_at	101251608	LOC101251608	uncharacterized LOC101251608	XM_004228284 /// XM_004228285	---																0.00443488	2.21511	2.21511				0.00547183	2.0869	2.0869
Les.1375.1.A1_at	101251886	LOC101251886	uncharacterized LOC101251886	XM_004240110	Solyc05g042120.2.1																						0.0229921	2.01443	2.01443
Les.1379.1.A1_at	101253074	LOC101253074	putative UPF0481 protein At3g02645	XM_004236405	Solyc03g117260.1.1										0.0465663	0.238546	-4.19207							0.0152341	0.16721	-5.98051	0.000171063	0.0440089	-22.7227	C:GO:0016020; C:GO:0016021	C:membrane; C:integral component of membrane
Les.1382.1.A1_at	101264926	LOC101264926	UPF0307 protein AZOSEA05410	XM_004238317	Solyc04g081540.2.1																			0.00333896	0.430271	-2.32412
Les.1389.1.S1_at	544034	LE16	non-specific lipid transfer protein	NM_001247024	Solyc10g075090.1.1										0.00602019	4.23114	4.23114							0.000241685	7.9741	7.9741	0.000587411	6.93995	6.93995	P:GO:0006869; F:GO:0008289	P:lipid transport; F:lipid binding
Les.1397.1.A1_at	543547	COP1	COP1 homolog	NM_001247118	Solyc12g005950.1.1																			5.57632e-09	0.178109	-5.61453	2.95268e-05	0.367107	-2.724	P:GO:0048573; F:GO:0004842; P:GO:0006281; C:GO:0005634; F:GO:0042802; P:GO:0009649; P:GO:0046283; C:GO:0016604; P:GO:0009640; P:GO:0010119; P:GO:0009641; P:GO:0016567	P:photoperiodism, flowering; F:ubiquitin-protein transferase activity; P:DNA repair; C:nucleus; F:identical protein binding; P:entrainment of circadian clock; P:anthocyanin-containing compound metabolic process; C:nuclear body; P:photomorphogenesis; P:regulation of stomatal movement; P:shade avoidance; P:protein ubiquitination
Les.1399.1.A1_at	101266018	LOC101266018	cysteine-rich repeat secretory protein 12-like	XM_004236886 /// XM_004236887	Solyc04g007950.2.1																0.0456613	2.60489	2.60489							C:GO:0016020; C:GO:0016021	C:membrane; C:integral component of membrane
Les.14.1.S1_at	544118	SBT2	SBT2 protein	NM_001247359	Solyc03g006970.1.1																						0.00143435	0.287828	-3.47429	C:GO:0005618; P:GO:0006508; F:GO:0004252	C:cell wall; P:proteolysis; F:serine-type endopeptidase activity	EC:3.4.21	Acting on peptide bonds (peptidases)
Les.140.1.S1_at	543957	BiP/grp78	glucose-regulated protein 78	NM_001247707	Solyc08g082820.2.1																6.47916e-05	2.97535	2.97535							C:GO:0005788; F:GO:0005524	C:endoplasmic reticulum lumen; F:ATP binding
Les.1401.1.S1_at	543804	bmy3	1,4-alpha-glucan-maltohydrolase	NM_001247123	Solyc01g067660.2.1	0.009266	0.282923	-3.53453										0.0271353	0.391689	-2.55305				3.52271e-05	6.35861	6.35861	0.00802622	2.89243	2.89243	P:GO:0000272; F:GO:0016161; P:GO:0005982; P:GO:0005985	P:polysaccharide catabolic process; F:beta-amylase activity; P:starch metabolic process; P:sucrose metabolic process	EC:3.2.1.2	Beta-amylase
Les.1406.1.A1_at	101257271	LOC101257271	anthranilate phosphoribosyltransferase, chloroplastic	XM_004241460 /// XM_004241461	Solyc06g071550.2.1																0.00712423	2.36664	2.36664							C:GO:0009570; F:GO:0016757; P:GO:0009094; P:GO:0000162; P:GO:0006571; F:GO:0004048	C:chloroplast stroma; F:transferase activity, transferring glycosyl groups; P:L-phenylalanine biosynthetic process; P:tryptophan biosynthetic process; P:tyrosine biosynthetic process; F:anthranilate phosphoribosyltransferase activity	EC:2.4.2.18	Anthranilate phosphoribosyltransferase
Les.141.1.S1_at	543557	EXPA4	expansin A4	NM_001247152	Solyc09g010860.2.1																0.0488342	0.471475	-2.121	0.000481398	0.251541	-3.9755	0.00023049	0.221341	-4.51792	C:GO:0005618; C:GO:0016020; P:GO:0009664; C:GO:0005576	C:cell wall; C:membrane; P:plant-type cell wall organization; C:extracellular region
Les.1415.1.S1_at	101255012	LOC101255012	uncharacterized LOC101255012	XM_004243924	Solyc07g066570.2.1																			0.00594165	2.04517	2.04517
Les.1416.1.A1_at	101260375	LOC101260375	uncharacterized LOC101260375	XM_004247495	---																						0.0154211	2.11435	2.11435
Les.1419.2.A1_at	101262560	LOC101262560	inactive protein RESTRICTED TEV MOVEMENT 1-like	XM_004247575	Solyc09g083020.1.1																						0.0011694	2.43663	2.43663
Les.1424.2.S1_at	101258104	LOC101258104	UPF0603 protein At1g54780, chloroplastic-like	XM_004230120	Solyc01g098640.2.1																0.00286005	0.376475	-2.65622	0.000853839	0.349767	-2.85905	6.19498e-07	0.147487	-6.78025	C:GO:0031977; C:GO:0016021; P:GO:0019497; P:GO:0010206; P:GO:0006771; P:GO:0016311; F:GO:0003993; C:GO:0009535	C:thylakoid lumen; C:integral component of membrane; P:hexachlorocyclohexane metabolic process; P:photosystem II repair; P:riboflavin metabolic process; P:dephosphorylation; F:acid phosphatase activity; C:chloroplast thylakoid membrane	EC:3.1.3.41; EC:3.1.3.2	4-nitrophenylphosphatase; Acid phosphatase
Les.1426.1.S1_at	101256613	LOC101256613	probable sugar phosphate/phosphate translocator At1g12500-like	XM_004245637	Solyc08g079790.1.1																0.00128228	0.422659	-2.36597							C:GO:0016021	C:integral component of membrane
Les.1429.1.A1_at	101243782	LOC101243782	GDSL esterase/lipase EXL3-like	XM_004238329	Solyc04g081790.2.1																			0.000357961	0.200129	-4.99677				F:GO:0016788; P:GO:0016042; F:GO:0016298	F:hydrolase activity, acting on ester bonds; P:lipid catabolic process; F:lipase activity
Les.1431.1.A1_at	101254581	LOC101254581	plastidic ATP/ADP-transporter-like	XM_004235675	Solyc03g119970.2.1										0.00672705	2.11882	2.11882													F:GO:0000166; F:GO:0005524; C:GO:0009507; F:GO:0005471; C:GO:0031969; C:GO:0016020; C:GO:0016021; P:GO:0015867; P:GO:0006810; P:GO:0015866; C:GO:0009536	F:nucleotide binding; F:ATP binding; C:chloroplast; F:ATP:ADP antiporter activity; C:chloroplast membrane; C:membrane; C:integral component of membrane; P:ATP transport; P:transport; P:ADP transport; C:plastid
Les.1433.1.S1_at	101246994	LOC101246994	uncharacterized LOC101246994	XM_004251550	Solyc12g007000.1.1																0.0440229	0.496081	-2.0158							C:GO:0016020; C:GO:0016021	C:membrane; C:integral component of membrane
Les.1436.1.A1_at	101250971	LOC101250971	chloride conductance regulatory protein ICln-like	XM_004234895	Solyc03g083540.2.1																0.00175265	3.67371	3.67371				0.00922486	2.69965	2.69965	C:GO:0034715; C:GO:0034709; C:GO:0005829; P:GO:0006821; C:GO:0005886; P:GO:0006884; P:GO:0000387	C:pICln-Sm protein complex; C:methylosome; C:cytosol; P:chloride transport; C:plasma membrane; P:cell volume homeostasis; P:spliceosomal snRNP assembly
Les.1439.2.A1_at	101251116	LOC101251116	WAT1-related protein At4g19185-like	XM_004245958	Solyc08g075470.2.1																0.00451591	2.41072	2.41072				0.00737959	2.18541	2.18541	P:GO:0055085; F:GO:0022857; C:GO:0016020; C:GO:0016021; P:GO:0006810; C:GO:0005886	P:transmembrane transport; F:transmembrane transporter activity; C:membrane; C:integral component of membrane; P:transport; C:plasma membrane
Les.144.1.S1_at	100147717	LOC100147717	uncharacterized LOC100147717	XM_004240656	---										0.0177313	0.443633	-2.25412							5.45157e-07	0.109919	-9.09764	0.000173176	0.233237	-4.28749
Les.1442.2.S1_at	101266708	LOC101266708	TPR repeat-containing thioredoxin TDX-like	XM_004235712 /// XM_004235713	Solyc03g118550.2.1																0.0301995	2.98539	2.98539							C:GO:0005623; P:GO:0045454; F:GO:0046983	C:cell; P:cell redox homeostasis; F:protein dimerization activity
Les.1443.1.A1_at	101265154	LOC101265154	zinc finger Ran-binding domain-containing protein 2-like	XM_004245152	Solyc08g067180.2.1							0.0158065	0.240514	-4.15777							0.0287161	0.261894	-3.81834	0.000891908	0.128014	-7.81166	0.0221698	0.261577	-3.82296	F:GO:0046872	F:metal ion binding
Les.145.1.S1_at	543600	LOC543600	TGACG-sequence-specific DNA-binding protein TGA-2.1	NM_001309871	Solyc10g080770.1.1																						0.00028883	2.64695	2.64695	C:GO:0005634; C:GO:0005667; F:GO:0003700; P:GO:0006355; F:GO:0043565; P:GO:0006355	C:nucleus; C:transcription factor complex; F:transcription factor activity, sequence-specific DNA binding; P:regulation of transcription, DNA-templated; F:sequence-specific DNA binding; P:regulation of transcription, DNA-templated
Les.1455.1.S1_at	101255589	LOC101255589	monoglyceride lipase-like	XM_004238884	Solyc05g009390.2.1										0.000278072	3.33871	3.33871				0.00201082	2.8454	2.8454				0.0201127	2.03834	2.03834	C:GO:0016020; P:GO:0016042; F:GO:0016298	C:membrane; P:lipid catabolic process; F:lipase activity
Les.1456.1.A1_at	101259839	LOC101259839	DUF21 domain-containing protein At1g47330-like	XM_004238211	Solyc04g080370.2.1																						0.00103715	2.13631	2.13631	C:GO:0016020; C:GO:0016021	C:membrane; C:integral component of membrane
Les.1459.1.A1_at	101259886	LOC101259886	pto-interacting protein 1	XM_004230126	Solyc01g098740.2.1																						0.00128372	0.251158	-3.98156	F:GO:0000166; F:GO:0005524; C:GO:0016020; C:GO:0016021; P:GO:0007166; F:GO:0004672; P:GO:0007178; P:GO:0009069; P:GO:0006468; F:GO:0004674; C:GO:0005886; F:GO:0004675	F:nucleotide binding; F:ATP binding; C:membrane; C:integral component of membrane; P:cell surface receptor signaling pathway; F:protein kinase activity; P:transmembrane receptor protein serine/threonine kinase signaling pathway; P:serine family amino acid metabolic process; P:protein phosphorylation; F:protein serine/threonine kinase activity; C:plasma membrane; F:transmembrane receptor protein s…	EC:2.7.11	Transferring phosphorus-containing groups
Les.1460.1.A1_at	101250140	LOC101250140	protein-lysine methyltransferase METTL21A-like	XM_004244703	Solyc08g014040.2.1																0.013195	2.52683	2.52683							F:GO:0008168; P:GO:0032259	F:methyltransferase activity; P:methylation
Les.1465.1.S1_at	101268146	LOC101268146	fatty acid amide hydrolase-like	XM_004230491	Solyc01g106330.2.1										0.00360114	2.8614	2.8614				0.0167356	2.44285	2.44285							F:GO:0016884	F:carbon-nitrogen ligase activity, with glutamine as amido-N-donor
Les.147.1.S1_at	543976	LOC543976	chlorophyll a/b-binding protein precursor	XM_004251492	Solyc12g006140.1.1							3.36073e-05	0.0823817	-12.1386	0.0120079	0.273891	-3.65109				1.26324e-05	0.0590611	-16.9316	0.041091	0.358323	-2.79078	2.94441e-07	0.0305934	-32.6868	F:GO:0046872; F:GO:0031409; C:GO:0009523; C:GO:0009941; C:GO:0016021; C:GO:0009522; P:GO:0018298; F:GO:0016168; C:GO:0010287; P:GO:0009416; P:GO:0009768; C:GO:0009535	F:metal ion binding; F:pigment binding; C:photosystem II; C:chloroplast envelope; C:integral component of membrane; C:photosystem I; P:protein-chromophore linkage; F:chlorophyll binding; C:plastoglobule; P:response to light stimulus; P:photosynthesis, light harvesting in photosystem I; C:chloroplast thylakoid membrane
Les.1472.1.S1_at	543931	PsbQ	photosystem II oxygen-evolving complex protein 3	NM_001247599	Solyc02g079950.2.1																						2.82844e-06	0.235925	-4.23863	F:GO:0005509; C:GO:0009654; P:GO:0015979; C:GO:0019898	F:calcium ion binding; C:photosystem II oxygen evolving complex; P:photosynthesis; C:extrinsic component of membrane
Les.1479.1.A1_at	101247586	LOC101247586	SNF7 family protein	XM_004251634	Solyc12g009060.1.1																0.0166799	3.20784	3.20784				0.00285438	4.20971	4.20971	P:GO:0007034; C:GO:0010008	P:vacuolar transport; C:endosome membrane
Les.1481.1.A1_at	101258068	LOC101258068	ovarian cancer-associated gene 2 protein homolog	XM_004239978	Solyc05g051430.2.1																0.0180729	3.91897	3.91897				0.000686508	7.45535	7.45535
Les.1485.1.S1_at	101252938	LOC101252938	50S ribosomal protein 5, chloroplastic-like	XM_004249289	Solyc10g081100.1.1																			0.0077199	0.389844	-2.56513	0.000190378	0.231685	-4.3162	P:GO:0080158; P:GO:0032544; C:GO:0009535	P:chloroplast ribulose bisphosphate carboxylase complex biogenesis; P:plastid translation; C:chloroplast thylakoid membrane
Les.1487.1.A1_at	101260216	LOC101260216	PHD finger protein ALFIN-LIKE 5-like	XM_004235527	Solyc03g121930.2.1																0.0388572	2.48206	2.48206				0.0242705	2.59351	2.59351	F:GO:0042393; F:GO:0046872; P:GO:0006355	F:histone binding; F:metal ion binding; P:regulation of transcription, DNA-templated
Les.1491.1.S1_at	101266541	LOC101266541	uncharacterized LOC101266541	XM_004244906	Solyc08g043180.2.1																0.0126612	0.26099	-3.83156				0.00311901	0.209399	-4.77556
Les.1492.1.S1_at	101254767	LOC101254767	uncharacterized LOC101254767	XM_004252177	Solyc12g036170.1.1																0.0210799	0.363445	-2.75145	0.000320307	0.19726	-5.06945	2.70064e-05	0.129158	-7.74248	C:GO:0010598; C:GO:0009535	C:NAD(P)H dehydrogenase complex (plastoquinone); C:chloroplast thylakoid membrane
Les.1498.1.S1_at	101246641	LOC101246641	universal stress protein YxiE-like	XM_004242265	Solyc06g084540.2.1										0.0269715	2.13251	2.13251							0.00712335	2.58033	2.58033	0.000572463	3.69757	3.69757	P:GO:0006950; F:GO:0016787	P:response to stress; F:hydrolase activity
Les.15.1.S1_at	544117	SBT1	SBT1 protein	NM_001247353	Solyc04g078110.1.1																						0.00932101	3.659	3.659	C:GO:0005618; P:GO:0006508; F:GO:0004252	C:cell wall; P:proteolysis; F:serine-type endopeptidase activity	EC:3.4.21	Acting on peptide bonds (peptidases)
Les.150.1.S1_at	101248565	LOC101248565	serine/threonine-protein kinase HT1-like	XM_004236065	Solyc03g114210.2.1				0.0185291	2.43064	2.43064										0.0183259	2.4349	2.4349	0.00535289	0.364468	-2.74373				F:GO:0005524; P:GO:0000165; P:GO:0000186; F:GO:0004709; P:GO:0007178; P:GO:0009069; C:GO:0005622	F:ATP binding; P:MAPK cascade; P:activation of MAPKK activity; F:MAP kinase kinase kinase activity; P:transmembrane receptor protein serine/threonine kinase signaling pathway; P:serine family amino acid metabolic process; C:intracellular	EC:2.7.11.25; EC:2.7.11	Mitogen-activated protein kinase kinase kinase; Transferring phosphorus-containing groups
Les.1501.1.A1_at	101253959	LOC101253959	uncharacterized LOC101253959	XM_004232665	Solyc02g080510.1.1																			0.0014551	4.95057	4.95057
Les.1509.1.S1_at	101261160	LOC101261160	pyruvate kinase isozyme A, chloroplastic-like	XM_004247570	Solyc09g082970.2.1																0.00242997	0.467213	-2.14035							C:GO:0009570; P:GO:0006094; P:GO:0006096; P:GO:0006144; P:GO:0009832; F:GO:0000287; F:GO:0004743; F:GO:0005524; F:GO:0030955; P:GO:0010431; F:GO:0016301; P:GO:0015976; P:GO:0016049; P:GO:0016126	C:chloroplast stroma; P:gluconeogenesis; P:glycolytic process; P:purine nucleobase metabolic process; P:plant-type cell wall biogenesis; F:magnesium ion binding; F:pyruvate kinase activity; F:ATP binding; F:potassium ion binding; P:seed maturation; F:kinase activity; P:carbon utilization; P:cell growth; P:sterol biosynthetic process	EC:2.7.1.40	Pyruvate kinase
Les.1510.2.A1_at	101252083	LOC101252083	sphingosine-1-phosphate lyase-like	XM_004239193	Solyc05g015860.2.1																			0.000871128	2.16511	2.16511	4.05431e-05	2.83878	2.83878	F:GO:0030170; F:GO:0003824; C:GO:0016020; F:GO:0016829; C:GO:0005783; P:GO:0019752; P:GO:0030149; F:GO:0016831	F:pyridoxal phosphate binding; F:catalytic activity; C:membrane; F:lyase activity; C:endoplasmic reticulum; P:carboxylic acid metabolic process; P:sphingolipid catabolic process; F:carboxy-lyase activity
Les.1514.1.S1_at	101266439	LOC101266439	plastid lipid-associated protein 3, chloroplastic-like	XM_004245925	Solyc08g076480.2.1							1.60559e-05	0.398636	-2.50856													0.000206352	0.475647	-2.1024	C:GO:0009509; C:GO:0005634; P:GO:0009409; C:GO:0031977; F:GO:0005515; P:GO:0009737; C:GO:0005739; C:GO:0010319; F:GO:0005198; P:GO:0010205; C:GO:0010287; C:GO:0009535	C:chromoplast; C:nucleus; P:response to cold; C:thylakoid lumen; F:protein binding; P:response to abscisic acid; C:mitochondrion; C:stromule; F:structural molecule activity; P:photoinhibition; C:plastoglobule; C:chloroplast thylakoid membrane
Les.1518.2.A1_at	101260562	LOC101260562	vacuolar-sorting receptor 1-like	XM_004246237	Solyc09g015670.2.1																						0.0115713	2.19291	2.19291	F:GO:0005509; C:GO:0016020; C:GO:0016021	F:calcium ion binding; C:membrane; C:integral component of membrane
Les.1524.1.A1_at	101265262	LOC101265262	fatty-acid-binding protein 2	XM_004244992	Solyc08g061480.2.1																0.0248025	5.57313	5.57313				0.0204941	5.44764	5.44764	C:GO:0009570; F:GO:0005504; F:GO:0045430; F:GO:0016872; P:GO:0009813; P:GO:0006631	C:chloroplast stroma; F:fatty acid binding; F:chalcone isomerase activity; F:intramolecular lyase activity; P:flavonoid biosynthetic process; P:fatty acid metabolic process	EC:5.5.1.6	Chalcone isomerase
Les.1528.2.S1_at	101249844	LOC101249844	30S ribosomal protein S6 alpha, chloroplastic-like	XM_004245446	Solyc08g082690.2.1																0.0207611	0.307449	-3.25257	0.0244728	0.343119	-2.91444	0.000711998	0.169974	-5.88326	F:GO:0003735; P:GO:0042254; C:GO:0005840; F:GO:0070181; C:GO:0009535; P:GO:0006412	F:structural constituent of ribosome; P:ribosome biogenesis; C:ribosome; F:small ribosomal subunit rRNA binding; C:chloroplast thylakoid membrane; P:translation
Les.1531.1.S1_at	101245045	LOC101245045	uncharacterized LOC101245045	XM_004236139	Solyc03g113240.2.1																						2.01864e-05	0.434564	-2.30115	C:GO:0016021; C:GO:0009535	C:integral component of membrane; C:chloroplast thylakoid membrane
Les.1532.2.A1_at	101254436	LOC101254436	glycine-rich RNA-binding protein 2	XM_004249294	---																0.000945742	2.27441	2.27441				4.94713e-05	2.80257	2.80257
Les.1538.1.A1_at	101266303	LOC101266303	putative septum site-determining protein minD homolog, chloroplastic	XM_010319206	Solyc03g007980.1.1																			0.0005333	0.430591	-2.32239				F:GO:0016887	F:ATPase activity	EC:3.6.1.3; EC:3.6.1.15	Adenosinetriphosphatase; Nucleoside-triphosphate phosphatase
Les.1539.1.A1_at	---	---	Ubiquitin-conjugating enzyme E2	---	Solyc07g024070.1.1																0.00879808	3.00151	3.00151							C:GO:0005634; F:GO:0061630; F:GO:0031625; C:GO:0005737; P:GO:0000209; P:GO:0006974	C:nucleus; F:ubiquitin protein ligase activity; F:ubiquitin protein ligase binding; C:cytoplasm; P:protein polyubiquitination; P:cellular response to DNA damage stimulus
Les.1549.1.A1_at	101249681	LOC101249681	uncharacterized LOC101249681	XM_004230262	Solyc01g100530.2.1																			7.39159e-05	0.236271	-4.23242	0.00270817	0.360392	-2.77476
Les.1553.1.A1_at	101252707	LOC101252707	F-box protein SKIP8	XM_010327049	Solyc08g082560.2.1																0.011136	3.12272	3.12272				0.00548625	3.33476	3.33476
Les.1557.1.A1_at	101265299	LOC101265299	transcription factor bHLH144-like	XM_004233050	---										0.0447215	2.18447	2.18447										0.00702168	3.0361	3.0361
Les.1558.2.A1_at	100529135	CDPK2	calcium dependent protein kinase	NM_001247855	Solyc04g009800.2.1																0.00920382	2.6588	2.6588				0.00742531	2.61537	2.61537	P:GO:0046777; F:GO:0004683; F:GO:0004672; P:GO:0009069; P:GO:0006468; F:GO:0009931; C:GO:0005634; F:GO:0005524; P:GO:0009738; F:GO:0005516; C:GO:0005737; F:GO:0005509; P:GO:0016310; P:GO:0018105; F:GO:0016301; P:GO:0035556	P:protein autophosphorylation; F:calmodulin-dependent protein kinase activity; F:protein kinase activity; P:serine family amino acid metabolic process; P:protein phosphorylation; F:calcium-dependent protein serine/threonine kinase activity; C:nucleus; F:ATP binding; P:abscisic acid-activated signaling pathway; F:calmodulin binding; C:cytoplasm; F:calcium ion binding; P:phosphorylation; P:peptidyl…	EC:2.7.11; EC:2.7.11.17	Transferring phosphorus-containing groups; Calcium/calmodulin-dependent protein kinase
Les.1561.1.S1_at	101265086	LOC101265086	probable mediator of RNA polymerase II transcription subunit 26c-like	XM_004249828	Solyc11g005450.1.1																0.0447267	0.336243	-2.97404							F:GO:0003677; C:GO:0005829; C:GO:0070449; P:GO:0006368	F:DNA binding; C:cytosol; C:elongin complex; P:transcription elongation from RNA polymerase II promoter
Les.1562.1.S1_at	100134915	LOC100134915	omega-3 fatty acid desaturase	NM_001246862	Solyc06g007130.2.1							0.0390695	0.399185	-2.50511							0.0118327	0.299224	-3.34198	4.9583e-06	0.0850625	-11.7561	0.000397905	0.174575	-5.72819	F:GO:0016717; P:GO:0006629; C:GO:0016021; P:GO:0055114	F:oxidoreductase activity, acting on paired donors, with oxidation of a pair of donors resulting in the reduction of molecular oxygen to two molecules of water; P:lipid metabolic process; C:integral component of membrane; P:oxidation-reduction process	EC:1.14.19	Acting on paired donors, with incorporation or reduction of molecular oxygen. The oxygen incorporated need not be derived from O(2)
Les.1567.1.A1_at	101267748	LOC101267748	SUMO-activating enzyme subunit 2-like	XM_004230825	Solyc01g109960.2.1																0.0226187	2.17159	2.17159							F:GO:0000166; F:GO:0005524; F:GO:0019948; C:GO:0005737; F:GO:0046872; P:GO:0016925; F:GO:0008641	F:nucleotide binding; F:ATP binding; F:SUMO activating enzyme activity; C:cytoplasm; F:metal ion binding; P:protein sumoylation; F:small protein activating enzyme activity
Les.157.1.S1_at	543731	sus3	sucrose synthase	NM_001247875	Solyc07g042550.2.1																0.00143188	6.98637	6.98637	0.0028671	5.33313	5.33313	0.00837104	4.35398	4.35398	F:GO:0016157; P:GO:0005982; P:GO:0005985	F:sucrose synthase activity; P:starch metabolic process; P:sucrose metabolic process	EC:2.4.1.13	Sucrose synthase
Les.1581.1.A1_at	101259117	LOC101259117	vacuolar protein sorting-associated protein 24 homolog 1-like	XM_004250923	Solyc11g066260.1.1																						0.0168414	2.43248	2.43248	P:GO:0007034; C:GO:0005622	P:vacuolar transport; C:intracellular
Les.159.1.S1_at	543830	LOC543830	profilin	NM_001247209	Solyc11g070130.1.1																						0.000158108	2.21016	2.21016	P:GO:0042989; C:GO:0005938; C:GO:0015629; F:GO:0003785	P:sequestering of actin monomers; C:cell cortex; C:actin cytoskeleton; F:actin monomer binding
Les.1590.1.A1_at	101260184	LOC101260184	uncharacterized LOC101260184	XM_004248649	Solyc10g054030.1.1																0.0210574	2.1313	2.1313				0.00283877	2.64776	2.64776
Les.1603.1.A1_at	101265617	LOC101265617	chlorophyll a-b binding protein 8, chloroplastic-like	XM_004251778	Solyc12g011280.1.1																0.0158399	0.323345	-3.09267				1.49625e-05	0.103191	-9.69078	C:GO:0009941; C:GO:0009523; P:GO:0009765; C:GO:0009522; P:GO:0009416; P:GO:0009768; C:GO:0009536; C:GO:0009579; C:GO:0009535; C:GO:0009507; C:GO:0016020; F:GO:0031409; C:GO:0016021; P:GO:0018298; P:GO:0015979; F:GO:0016168; C:GO:0010287	C:chloroplast envelope; C:photosystem II; P:photosynthesis, light harvesting; C:photosystem I; P:response to light stimulus; P:photosynthesis, light harvesting in photosystem I; C:plastid; C:thylakoid; C:chloroplast thylakoid membrane; C:chloroplast; C:membrane; F:pigment binding; C:integral component of membrane; P:protein-chromophore linkage; P:photosynthesis; F:chlorophyll binding; C:plastoglo…
Les.1604.1.A1_at	101260415	LOC101260415	COBRA-like protein 4-like	XM_004236021	Solyc03g114890.2.1							4.21954e-06	18.4583	18.4583	0.00067085	6.4866	6.4866				3.20273e-09	119.819	119.819	3.21087e-08	50.4393	50.4393	8.94585e-08	42.6037	42.6037	P:GO:0010215; P:GO:0016049; C:GO:0031225	P:cellulose microfibril organization; P:cell growth; C:anchored component of membrane
Les.1606.1.S1_at	101266812	LOC101266812	monoglyceride lipase-like	XM_004236718	Solyc04g010250.2.1																0.00136627	4.57807	4.57807	0.00341665	0.279617	-3.57632				C:GO:0016020; P:GO:0016042; F:GO:0016298	C:membrane; P:lipid catabolic process; F:lipase activity
Les.1609.1.S1_at	101259605	LOC101259605	glucan endo-1,3-beta-glucosidase 14-like	XM_004251009	Solyc11g068440.1.1	0.00189181	2.59303	2.59303										0.00589944	2.08808	2.08808										C:GO:0005634; P:GO:0005975; C:GO:0005737; C:GO:0016021; F:GO:0004553; C:GO:0046658; F:GO:0030247	C:nucleus; P:carbohydrate metabolic process; C:cytoplasm; C:integral component of membrane; F:hydrolase activity, hydrolyzing O-glycosyl compounds; C:anchored component of plasma membrane; F:polysaccharide binding
Les.1610.1.S1_at	778202	PDH	proline dehydrogenase	XM_004232062	Solyc02g089620.2.1													0.0381419	3.0167	3.0167										P:GO:0006525; F:GO:0004657; P:GO:0055114; P:GO:0006561; P:GO:0006562	P:arginine metabolic process; F:proline dehydrogenase activity; P:oxidation-reduction process; P:proline biosynthetic process; P:proline catabolic process	EC:1.5.99.8	Acting on the CH-NH group of donors
Les.1613.2.S1_at	101255683	IDI1	isopentenyl diphosphate isomerase	XM_004237331	Solyc04g056390.2.1																0.0428051	0.297936	-3.35642				0.0442041	0.318441	-3.1403	F:GO:0004452; P:GO:0006694; P:GO:0016114; F:GO:0016787	F:isopentenyl-diphosphate delta-isomerase activity; P:steroid biosynthetic process; P:terpenoid biosynthetic process; F:hydrolase activity	EC:5.3.3.2	Isopentenyl-diphosphate Delta-isomerase
Les.1614.1.A1_at	100301923	LOC100301923	PI-phospholipase C PLC1	NM_001247274	Solyc10g076710.1.1										0.000868258	2.53299	2.53299							0.00131307	2.43078	2.43078				F:GO:0004435; P:GO:0035556; P:GO:0009395; F:GO:0008081; F:GO:0004871; P:GO:0035556; C:GO:0005622; F:GO:0016787; P:GO:0046339	F:phosphatidylinositol phospholipase C activity; P:intracellular signal transduction; P:phospholipid catabolic process; F:phosphoric diester hydrolase activity; F:signal transducer activity; P:intracellular signal transduction; C:intracellular; F:hydrolase activity; P:diacylglycerol metabolic process	EC:3.1.4.11	Phosphoinositide phospholipase C
Les.1617.2.S1_s_at	101266629	LOC101266629	fructose-1,6-bisphosphatase, cytosolic-like	XM_004237739	Solyc04g071340.2.1										0.00320895	0.241499	-4.1408				0.021959	0.210029	-4.76125	0.0186546	0.222257	-4.4993	3.83185e-05	0.0454053	-22.0239	P:GO:0006094; C:GO:0005737; F:GO:0046872; P:GO:0006098; P:GO:0006096; F:GO:0042132; P:GO:0006013; P:GO:0006000; P:GO:0016311; P:GO:0015976	P:gluconeogenesis; C:cytoplasm; F:metal ion binding; P:pentose-phosphate shunt; P:glycolytic process; F:fructose 1,6-bisphosphate 1-phosphatase activity; P:mannose metabolic process; P:fructose metabolic process; P:dephosphorylation; P:carbon utilization	EC:3.1.3.23; EC:3.1.3.11; EC:3.1.3.41	Sugar-phosphatase; Fructose-bisphosphatase; 4-nitrophenylphosphatase
Les.162.1.S1_at	101263446	LOC101263446	E3 ubiquitin-protein ligase SINAT2-like	XM_004228631	Solyc01g006190.2.1	0.024624	0.479892	-2.0838										0.0137447	0.430933	-2.32055	0.0170568	0.447528	-2.2345							C:GO:0005634; F:GO:0008270; F:GO:0061630; P:GO:0043161; C:GO:0005737; P:GO:0007275; F:GO:0016874; P:GO:0042787	C:nucleus; F:zinc ion binding; F:ubiquitin protein ligase activity; P:proteasome-mediated ubiquitin-dependent protein catabolic process; C:cytoplasm; P:multicellular organism development; F:ligase activity; P:protein ubiquitination involved in ubiquitin-dependent protein catabolic process
Les.1624.1.A1_at	101265827	LOC101265827	NAC domain-containing protein 78-like	XM_004239662	Solyc05g055470.2.1																						0.00195912	2.73727	2.73727	C:GO:0005634; F:GO:0003677; P:GO:0006351; C:GO:0016020; C:GO:0016021; P:GO:0006355	C:nucleus; F:DNA binding; P:transcription, DNA-templated; C:membrane; C:integral component of membrane; P:regulation of transcription, DNA-templated
Les.1638.2.A1_at	101249421	LOC101249421	uncharacterized LOC101249421	XM_004250280	Solyc11g013020.1.1																0.0409117	3.10701	3.10701				0.0296207	3.17661	3.17661
Les.1645.1.A1_at	101244886	LOC101244886	probable glutathione S-transferase parC-like	XM_004243147	Solyc07g056440.2.1	0.0289137	0.187893	-5.32217													0.0373357	4.5521	4.5521	0.0329882	4.28676	4.28676	0.00141601	10.7544	10.7544	P:GO:0006803; P:GO:0009407; C:GO:0005737; P:GO:0006749; F:GO:0004364	P:obsolete glutathione conjugation reaction; P:toxin catabolic process; C:cytoplasm; P:glutathione metabolic process; F:glutathione transferase activity	EC:2.5.1.18	Glutathione transferase
Les.1650.1.A1_at	101265293	LOC101265293	tropinone reductase 1-like	XM_004249330	Solyc10g081560.1.1							0.00236722	6.7025	6.7025										0.000259626	10.6441	10.6441	0.000925628	8.31572	8.31572	F:GO:0016491; P:GO:0055114	F:oxidoreductase activity; P:oxidation-reduction process
Les.1654.1.A1_at	101257548	LOC101257548	homeobox-leucine zipper protein ATHB-15-like	XM_004235602	Solyc03g120910.2.1										0.00731941	2.01073	2.01073													C:GO:0005634; F:GO:0003677; F:GO:0008289	C:nucleus; F:DNA binding; F:lipid binding
Les.1657.1.A1_at	101256241	LOC101256241	rho GDP-dissociation inhibitor 1-like	XM_004250217	Solyc11g012270.1.1																			0.0281324	0.459799	-2.17486				C:GO:0005737; F:GO:0005094; P:GO:0050790	C:cytoplasm; F:Rho GDP-dissociation inhibitor activity; P:regulation of catalytic activity
Les.1664.1.S1_at	101264112	LOC101264112	2-oxoglutarate dehydrogenase, mitochondrial-like	XM_004236709	Solyc04g011350.2.1																0.000768183	3.17024	3.17024				0.00267647	2.59263	2.59263	F:GO:0030976; C:GO:0045252; F:GO:0004591; C:GO:0005739; C:GO:0005829; P:GO:0006099; P:GO:0006568; P:GO:0006554	F:thiamine pyrophosphate binding; C:oxoglutarate dehydrogenase complex; F:oxoglutarate dehydrogenase (succinyl-transferring) activity; C:mitochondrion; C:cytosol; P:tricarboxylic acid cycle; P:tryptophan metabolic process; P:lysine catabolic process	EC:1.2.4.2	Oxoglutarate dehydrogenase (succinyl-transferring)
Les.1665.1.S1_at	101250492	LOC101250492	metallothiol transferase FosB	XM_004235990	Solyc03g116530.2.1																						0.00638442	2.92268	2.92268	F:GO:0016829	F:lyase activity
Les.1669.2.A1_at	101265212	LOC101265212	uncharacterized LOC101265212	XM_010316190, XM_010316191	---																0.0054907	2.09268	2.09268				0.00040858	2.5851	2.5851
Les.167.1.S1_at	543981	SODCP.2	superoxide dismutase (SOD)	NM_001247840	Solyc11g066390.1.1																			0.010758	0.319821	-3.12675	7.71573e-05	0.133157	-7.50996	C:GO:0009570; F:GO:0004601; F:GO:0008270; F:GO:0005507; P:GO:0071486; P:GO:0019430; P:GO:0006804; C:GO:0048046; P:GO:0055114; F:GO:0004784; C:GO:0009579	C:chloroplast stroma; F:peroxidase activity; F:zinc ion binding; F:copper ion binding; P:cellular response to high light intensity; P:removal of superoxide radicals; P:obsolete peroxidase reaction; C:apoplast; P:oxidation-reduction process; F:superoxide dismutase activity; C:thylakoid	EC:1.15.1.1; EC:1.11.1.7	Superoxide dismutase; Peroxidase
Les.1676.1.A1_at	101262521	LOC101262521	pre-mRNA-splicing factor ISY1 homolog	XM_004239991	---										0.000384158	2.13939	2.13939
Les.1680.1.A1_at	101248174	LOC101248174	uncharacterized LOC101248174	XM_004234337	Solyc03g025910.2.1																0.00538264	2.06211	2.06211
Les.1686.3.S1_at	101263612	LOC101263612	DNA/RNA-binding protein KIN17-like	XM_004239740	Solyc05g054500.1.1																0.00579788	0.286104	-3.49524							C:GO:0005634; P:GO:0006260; F:GO:0003690; P:GO:0006974	C:nucleus; P:DNA replication; F:double-stranded DNA binding; P:cellular response to DNA damage stimulus
Les.1687.1.A1_at	101268471	LOC101268471	mitochondrial uncoupling protein 3-like	XM_004238757 /// XM_004238758	Solyc05g007730.2.1																0.0227942	2.24082	2.24082				0.00734036	2.52605	2.52605	P:GO:0009409; P:GO:0055085; C:GO:0031966; F:GO:0022857; P:GO:0006839; P:GO:0051881; C:GO:0016020; C:GO:0016021; P:GO:0006810; C:GO:0005743	P:response to cold; P:transmembrane transport; C:mitochondrial membrane; F:transmembrane transporter activity; P:mitochondrial transport; P:regulation of mitochondrial membrane potential; C:membrane; C:integral component of membrane; P:transport; C:mitochondrial inner membrane
Les.169.1.S1_at	543730	LOC543730	G2/mitotic-specific cyclin S13-7	XM_004249079 /// XM_004249080	Solyc10g078340.1.1							0.0246179	0.357381	-2.79814										0.000416797	0.175564	-5.69592	0.0419246	0.398014	-2.51247	C:GO:0005634; C:GO:0016021	C:nucleus; C:integral component of membrane
Les.1699.1.A1_at	100301927	SRG1	salt responsive protein 1	NM_001247294	Solyc03g122190.2.1																0.0245148	0.452602	-2.20944				0.00137293	2.93681	2.93681	C:GO:0005634; C:GO:0005667; F:GO:0003714; P:GO:0045892; P:GO:0009611; P:GO:2000022; P:GO:0031347	C:nucleus; C:transcription factor complex; F:transcription corepressor activity; P:negative regulation of transcription, DNA-templated; P:response to wounding; P:regulation of jasmonic acid mediated signaling pathway; P:regulation of defense response
Les.1712.1.A1_at	101258894	LOC101258894	isopenicillin N epimerase-like	XM_004229127	---																0.0216362	2.71665	2.71665
Les.1718.1.A1_at	101250408	LOC101250408	RNA-binding protein 42-like	XM_004239696 /// XM_004239697	Solyc05g055010.2.1																			0.0143301	3.63465	3.63465				F:GO:0003676; F:GO:0003723	F:nucleic acid binding; F:RNA binding
Les.172.2.S1_a_at	543894	SPM1	SPM1 protein	NM_001247478	Solyc03g007240.2.1																0.0087645	0.310324	-3.22244	0.0166788	2.68015	2.68015				F:GO:0004766; P:GO:0006525; P:GO:0006560; P:GO:0019482; P:GO:0006596	F:spermidine synthase activity; P:arginine metabolic process; P:proline metabolic process; P:beta-alanine metabolic process; P:polyamine biosynthetic process	EC:2.5.1.16	Spermidine synthase
Les.1721.1.A1_at	101249327	LOC101249327	uncharacterized LOC101249327	XM_004250974 /// XM_004250975	Solyc11g066950.1.1							0.011174	2.60034	2.60034	0.0284277	2.21479	2.21479				0.00251994	3.43944	3.43944				0.0168954	2.43973	2.43973	C:GO:0009507	C:chloroplast
Les.1724.2.S1_at	101253845	LOC101253845	glutathione S-transferase L3-like	XM_004249461 /// XM_004249462	Solyc10g084410.1.1										0.0420335	2.01813	2.01813				4.93402e-06	9.4206	9.4206	3.25029e-08	18.2007	18.2007	2.09359e-07	13.9607	13.9607	P:GO:0006803; C:GO:0005737; P:GO:0006749; P:GO:0010731; F:GO:0004364	P:obsolete glutathione conjugation reaction; C:cytoplasm; P:glutathione metabolic process; P:protein glutathionylation; F:glutathione transferase activity	EC:2.5.1.18	Glutathione transferase
Les.1729.1.A1_at	101252329	LOC101252329	ras-related protein RABA1f-like	XM_004248080	Solyc10g008840.2.1	0.00117259	0.239128	-4.18185										0.0074947	0.363771	-2.74898										F:GO:0005525; F:GO:0003924	F:GTP binding; F:GTPase activity	EC:3.6.1.15	Nucleoside-triphosphate phosphatase
Les.173.1.S1_at	101268623	aquaporin	aquaporin PIP2-7-like	NM_001279328	Solyc01g111660.2.1																			0.000305971	0.200319	-4.99205	0.000288679	0.192933	-5.18315	C:GO:0005887; P:GO:0006833; C:GO:0009506; F:GO:0015254; P:GO:0009992; P:GO:0015793; P:GO:0034220; F:GO:0015250; C:GO:0005773	C:integral component of plasma membrane; P:water transport; C:plasmodesma; F:glycerol channel activity; P:cellular water homeostasis; P:glycerol transport; P:ion transmembrane transport; F:water channel activity; C:vacuole
Les.1733.1.A1_at	101255629	LOC101255629	uncharacterized protein At4g00950-like	XM_004229946	Solyc01g096080.2.1																			3.23919e-06	0.421622	-2.37179				C:GO:0016021	C:integral component of membrane
Les.1738.1.S1_at	101264599	LOC101264599	cleavage stimulation factor subunit 1-like	XM_004252202	Solyc12g038540.1.1																0.00188644	3.55483	3.55483				0.0415493	2.09693	2.09693
Les.1739.1.S1_at	543767	t19-8	DnaJ like protein	NM_001246963	Solyc10g084300.1.1																			2.77108e-09	4.02267	4.02267				F:GO:0051082; P:GO:0006457	F:unfolded protein binding; P:protein folding
Les.174.1.A1_at	---	---	Transcription factor	---	Solyc03g113560.2.1																			0.0013379	0.270074	-3.70269				F:GO:0046983	F:protein dimerization activity
Les.1741.1.A1_at	544212	EXPA6	expansin	XM_004249586	Solyc10g086520.1.1										0.0242176	2.29088	2.29088							0.0455372	0.483815	-2.06691				C:GO:0005618; C:GO:0016020; P:GO:0009664; C:GO:0005576	C:cell wall; C:membrane; P:plant-type cell wall organization; C:extracellular region
Les.1743.1.A1_at	101268562	LOC101268562	protein ODORANT1-like	XM_004236642	Solyc04g014470.2.1										0.0094468	2.81142	2.81142							0.00764665	2.90725	2.90725	0.0130906	2.71465	2.71465	F:GO:0003677	F:DNA binding
Les.1748.1.A1_at	101246897	LOC101246897	peptidyl-prolyl cis-trans isomerase CYP37, chloroplastic-like	XM_004251800	Solyc12g013580.1.1																			2.47691e-05	0.373372	-2.67829	0.000177236	0.427646	-2.33838	F:GO:0003755; C:GO:0009507; C:GO:0031977; C:GO:0009534; P:GO:0000413; F:GO:0016853; C:GO:0009535; C:GO:0009579	F:peptidyl-prolyl cis-trans isomerase activity; C:chloroplast; C:thylakoid lumen; C:chloroplast thylakoid; P:protein peptidyl-prolyl isomerization; F:isomerase activity; C:chloroplast thylakoid membrane; C:thylakoid	EC:5.2.1.8	Peptidylprolyl isomerase
Les.1751.1.S1_at	101252622	LOC101252622	aspartic proteinase-like protein 2-like	XM_004246546	Solyc09g008600.2.1																0.0311553	0.466714	-2.14264							F:GO:0004190; P:GO:0030163; P:GO:0006508	F:aspartic-type endopeptidase activity; P:protein catabolic process; P:proteolysis	EC:3.4.23	Acting on peptide bonds (peptidases)
Les.1757.1.A1_at	101254364	LOC101254364	NADPH-dependent codeinone reductase 1-4-like	XM_004252246	Solyc12g042470.1.1																0.00547803	3.82833	3.82833				0.000161638	6.5768	6.5768	F:GO:0016491; P:GO:0055114	F:oxidoreductase activity; P:oxidation-reduction process
Les.176.1.S1_at	544010	Rab1A	small GTP-binding protein	NM_001246894	Solyc08g078070.2.1																0.000516786	2.91246	2.91246				4.24364e-05	3.57738	3.57738	C:GO:0005789; F:GO:0005525; P:GO:0006888; P:GO:0007264; C:GO:0000139	C:endoplasmic reticulum membrane; F:GTP binding; P:ER to Golgi vesicle-mediated transport; P:small GTPase mediated signal transduction; C:Golgi membrane
Les.1762.1.S1_at	101257194	LOC101257194	glycine cleavage system H protein, mitochondrial-like	XM_004244496 /// XM_004244497	Solyc08g007040.2.1																0.0391822	0.382056	-2.61742	0.000864697	0.205764	-4.85993	1.43088e-05	0.098741	-10.1275	P:GO:0019464; C:GO:0005960	P:glycine decarboxylation via glycine cleavage system; C:glycine cleavage complex
Les.1766.1.A1_at	101251257	LOC101251257	uncharacterized LOC101251257	XM_004234211	Solyc03g006570.2.1																0.0383937	2.11301	2.11301				0.00550711	2.70483	2.70483	F:GO:0005524; C:GO:0005737	F:ATP binding; C:cytoplasm
Les.1767.1.A1_at	100736483	LOC100736483	Lyk3	NM_001247783	Solyc03g121050.2.1																			0.0148891	2.07322	2.07322				P:GO:0007166; F:GO:0004672; P:GO:0007178; P:GO:0009069; P:GO:0006468; P:GO:0006952; C:GO:0005886; P:GO:0009789; F:GO:0004675; F:GO:0005524; P:GO:0009738; P:GO:0009737; P:GO:0045087; C:GO:0016020; C:GO:0016021; P:GO:0050832; P:GO:0031348	P:cell surface receptor signaling pathway; F:protein kinase activity; P:transmembrane receptor protein serine/threonine kinase signaling pathway; P:serine family amino acid metabolic process; P:protein phosphorylation; P:defense response; C:plasma membrane; P:positive regulation of abscisic acid-activated signaling pathway; F:transmembrane receptor protein serine/threonine kinase activity; F:ATP …	EC:2.7.11	Transferring phosphorus-containing groups
Les.177.1.S1_at	543765	st3	st3 protein	NM_001246953	Solyc09g074230.2.1	0.00431457	3.02245	3.02245							0.036047	2.00233	2.00233	0.0196917	2.18615	2.18615				0.000431797	3.61955	3.61955	0.000114865	4.39607	4.39607	C:GO:0005887; C:GO:0009507; C:GO:0009705; P:GO:0015992; P:GO:0006829; F:GO:0005351; P:GO:0046323; F:GO:0005355; P:GO:1904659	C:integral component of plasma membrane; C:chloroplast; C:plant-type vacuole membrane; P:proton transport; P:zinc II ion transport; F:sugar:proton symporter activity; P:glucose import; F:glucose transmembrane transporter activity; P:glucose transmembrane transport
Les.1773.1.S1_at	101254283	LOC101254283	phosphopantothenate--cysteine ligase 2-like	XM_004252504	Solyc12g056840.1.1																0.0104349	0.375518	-2.66299				0.00818688	0.379925	-2.6321	P:GO:0015940; C:GO:0009507; C:GO:0070062; P:GO:0015937; C:GO:0005829; F:GO:0004632	P:pantothenate biosynthetic process; C:chloroplast; C:extracellular exosome; P:coenzyme A biosynthetic process; C:cytosol; F:phosphopantothenate--cysteine ligase activity	EC:6.3.2.5	Phosphopantothenate--cysteine ligase
Les.178.1.S1_at	101261838	LOC101261838	polygalacturonase inhibitor-like	XM_004244030	Solyc07g065090.1.1																			0.0126801	0.42026	-2.37948	0.00825362	0.389204	-2.56935	P:GO:0006182; P:GO:0009650; F:GO:0090353; P:GO:0009611; P:GO:0046039; F:GO:0004383; P:GO:0048833; C:GO:0005794; P:GO:0010080; P:GO:0006144; C:GO:0009506; P:GO:0001944; C:GO:0048046; C:GO:0005829; P:GO:0016310; P:GO:0007165; P:GO:0009069; C:GO:0009505; F:GO:0004674; F:GO:0001653; F:GO:0005515; P:GO:0042493; P:GO:0045087; C:GO:0016020; P:GO:0031347	P:cGMP biosynthetic process; P:UV protection; F:polygalacturonase inhibitor activity; P:response to wounding; P:GTP metabolic process; F:guanylate cyclase activity; P:specification of floral organ number; C:Golgi apparatus; P:regulation of floral meristem growth; P:purine nucleobase metabolic process; C:plasmodesma; P:vasculature development; C:apoplast; C:cytosol; P:phosphorylation; P:signal tra…	EC:2.7.11; EC:4.6.1.2	Transferring phosphorus-containing groups; Guanylate cyclase
Les.1783.1.A1_at	101262669	LOC101262669	kirola-like	XM_004248734	Solyc10g048030.1.1				0.006191	0.350087	-2.85643										0.0218621	0.425068	-2.35257							P:GO:0009607; P:GO:0006952	P:response to biotic stimulus; P:defense response
Les.1784.1.S1_at	101261374	LOC101261374	uncharacterized LOC101261374	XM_004231212	Solyc01g098500.2.1	0.0334587	0.369192	-2.70861													0.00375937	0.256446	-3.89946				0.000616582	0.202765	-4.93182	F:GO:0022891; P:GO:0055085; C:GO:0016021	F:substrate-specific transmembrane transporter activity; P:transmembrane transport; C:integral component of membrane
Les.1785.1.A1_at	101247017	LOC101247017	prolycopene isomerase, chloroplastic-like	XM_004238938	Solyc05g010180.2.1	0.00552224	0.369117	-2.70917																0.00465875	0.206759	-4.83655				C:GO:0009507; F:GO:0016491; P:GO:0055114; F:GO:0016853	C:chloroplast; F:oxidoreductase activity; P:oxidation-reduction process; F:isomerase activity
Les.1786.1.A1_at	101267654	LOC101267654	magnesium-dependent phosphatase 1-like	XM_004230579	Solyc01g105970.2.1																						2.70455e-06	2.44765	2.44765	F:GO:0016791; P:GO:0016311	F:phosphatase activity; P:dephosphorylation	EC:3.1.3.41	4-nitrophenylphosphatase
Les.1789.1.A1_at	101249371	LOC101249371	alcohol dehydrogenase-like 6-like	XM_004241434	Solyc06g072160.2.1																0.00147651	3.17134	3.17134				0.014314	2.23621	2.23621	F:GO:0008270; F:GO:0016491; F:GO:0046872; P:GO:0055114	F:zinc ion binding; F:oxidoreductase activity; F:metal ion binding; P:oxidation-reduction process
Les.179.1.S1_at	543960	LOC543960	arginine decarboxylase	NM_001247720	Solyc01g110440.2.1																0.00456995	0.494042	-2.02412							P:GO:0006527; F:GO:0008792; P:GO:0006560; P:GO:0008295	P:arginine catabolic process; F:arginine decarboxylase activity; P:proline metabolic process; P:spermidine biosynthetic process	EC:4.1.1.19	Arginine decarboxylase
Les.1792.1.S1_at	101268015	LOC101268015	clathrin interactor EPSIN 1-like	XM_004245079	Solyc08g065890.2.1																0.00317406	0.222619	-4.49198							C:GO:0005794; F:GO:0002020; F:GO:0030276; C:GO:0005884; P:GO:0006623; C:GO:0009579	C:Golgi apparatus; F:protease binding; F:clathrin binding; C:actin filament; P:protein targeting to vacuole; C:thylakoid
Les.1793.1.A1_at	101246968	LOC101246968	uncharacterized LOC101246968	XM_004230504 /// XM_004230505 /// XM_004230506 /// XM_004230507	Solyc01g104910.2.1																			3.5585e-05	2.86545	2.86545
Les.1796.1.S1_at	101265522	LOC101265522	probable voltage-gated potassium channel subunit beta-like	XM_004252958	Solyc12g098150.1.1																0.0253666	0.463932	-2.15549							C:GO:0009506; C:GO:0005886	C:plasmodesma; C:plasma membrane
Les.180.1.S1_at	543563	AN35	annexin p35	NM_001247172	Solyc04g055170.2.1																						0.000508692	2.03999	2.03999	F:GO:0005509; F:GO:0005544	F:calcium ion binding; F:calcium-dependent phospholipid binding
Les.1801.1.S1_at	101264467	LOC101264467	KH domain-containing protein At1g09660-like	XM_004230393	Solyc01g103410.2.1																0.00478771	0.181264	-5.5168							F:GO:0003723	F:RNA binding
Les.1802.1.A1_at	101245647	LOC101245647	uncharacterized LOC101245647	XM_004238850	Solyc05g008920.2.1																			1.16332e-05	3.07193	3.07193
Les.1806.1.S1_at	101267733	LOC101267733	probable receptor-like protein kinase At5g15080-like	XM_004246597	Solyc09g008010.2.1																0.00328928	4.42566	4.42566				0.00127409	4.88379	4.88379	F:GO:0005524; F:GO:0004672; P:GO:0006468	F:ATP binding; F:protein kinase activity; P:protein phosphorylation
Les.1809.1.S1_at	101243917	LOC101243917	uncharacterized LOC101243917	XM_004245678	Solyc08g079240.2.1																0.0288873	0.224641	-4.45154	0.0240771	0.235139	-4.25281	0.00137959	0.108078	-9.25254	C:GO:0009570	C:chloroplast stroma
Les.1816.1.S1_at	101258952	LOC101258952	30S ribosomal protein 3-1, chloroplastic-like	XM_004238895	Solyc05g009570.2.1																0.0159049	0.304082	-3.28859	0.002051	0.225459	-4.4354	9.23953e-05	0.126347	-7.91473	C:GO:0009570; F:GO:0003735; P:GO:0042254; C:GO:0005840; P:GO:0032544; C:GO:0009535	C:chloroplast stroma; F:structural constituent of ribosome; P:ribosome biogenesis; C:ribosome; P:plastid translation; C:chloroplast thylakoid membrane
Les.1819.1.A1_a_at	101265327	LOC101265327	probable receptor-like protein kinase At1g80640-like	XM_004237515	Solyc04g045600.2.1																			0.000275625	0.329592	-3.03405	0.000188445	0.310296	-3.22273	F:GO:0000166; F:GO:0005524; C:GO:0016020; C:GO:0016021; F:GO:0004672; P:GO:0007166; P:GO:0007178; P:GO:0009069; F:GO:0004674; P:GO:0006468; C:GO:0005886; F:GO:0004675	F:nucleotide binding; F:ATP binding; C:membrane; C:integral component of membrane; F:protein kinase activity; P:cell surface receptor signaling pathway; P:transmembrane receptor protein serine/threonine kinase signaling pathway; P:serine family amino acid metabolic process; F:protein serine/threonine kinase activity; P:protein phosphorylation; C:plasma membrane; F:transmembrane receptor protein s…	EC:2.7.11	Transferring phosphorus-containing groups
Les.182.1.S1_at	101243887	LOC101243887	3'-N-debenzoyl-2'-deoxytaxol N-benzoyltransferase-like	XM_004238156 /// XM_004238157	Solyc04g079720.2.1																			0.000795436	2.0951	2.0951				P:GO:0042967; P:GO:0016102; F:GO:0050643	P:acyl-carrier-protein biosynthetic process; P:diterpenoid biosynthetic process; F:10-deacetylbaccatin III 10-O-acetyltransferase activity	EC:2.3.1.167	10-deacetylbaccatin III 10-O-acetyltransferase
Les.1821.1.A1_at	101257455	LOC101257455	lamin-like protein-like	XM_004235847	Solyc03g117560.2.1							0.0486695	0.494067	-2.02402										4.18676e-06	0.133547	-7.48798	0.00108468	0.28091	-3.55986	P:GO:0006118; F:GO:0009055; C:GO:0016020; C:GO:0016021; C:GO:0046658	P:obsolete electron transport; F:electron carrier activity; C:membrane; C:integral component of membrane; C:anchored component of plasma membrane
Les.1826.1.A1_at	101255911	LOC101255911	uncharacterized LOC101255911	XM_004228356	Solyc01g010440.2.1																0.0080659	5.96876	5.96876				0.0068253	5.71455	5.71455
Les.1829.1.S1_at	101264821	LOC101264821	probable fructose-bisphosphate aldolase 3, chloroplastic-like	XM_004238829	Solyc05g008600.2.1																1.24881e-06	2.75332	2.75332	3.30073e-06	2.42618	2.42618	8.46259e-06	2.32341	2.32341	P:GO:0006094; P:GO:0006020; P:GO:0006098; P:GO:0006096; P:GO:0006013; P:GO:0006000; F:GO:0004332; P:GO:0015976	P:gluconeogenesis; P:inositol metabolic process; P:pentose-phosphate shunt; P:glycolytic process; P:mannose metabolic process; P:fructose metabolic process; F:fructose-bisphosphate aldolase activity; P:carbon utilization	EC:4.1.2.13	Fructose-bisphosphate aldolase
Les.1832.1.A1_at	101262255	LOC101262255	protein PROTON GRADIENT REGULATION 5, chloroplastic-like	XM_004247716	Solyc09g090570.2.1																8.12703e-06	0.439436	-2.27564							P:GO:0006118; F:GO:0009055; P:GO:0071484; P:GO:0009644; P:GO:0009773; P:GO:0010117; C:GO:0009535; P:GO:0009414	P:obsolete electron transport; F:electron carrier activity; P:cellular response to light intensity; P:response to high light intensity; P:photosynthetic electron transport in photosystem I; P:photoprotection; C:chloroplast thylakoid membrane; P:response to water deprivation
Les.184.1.S1_at	543969	LOC543969	aspartic protease precursor	NM_001247773	Solyc01g101240.2.1																			2.40574e-05	2.37968	2.37968				F:GO:0004190; P:GO:0030163; P:GO:0006508; P:GO:0006629	F:aspartic-type endopeptidase activity; P:protein catabolic process; P:proteolysis; P:lipid metabolic process	EC:3.4.23	Acting on peptide bonds (peptidases)
Les.1841.1.S1_at	544028	ACS1A	1-aminocyclopropane-1-carboxylate synthase	NM_001246993	Solyc00g095860.1.1							0.00902884	3.01606	3.01606													0.00670098	3.17052	3.17052	P:GO:0042218; F:GO:0030170; F:GO:0016847; P:GO:0006520	P:1-aminocyclopropane-1-carboxylate biosynthetic process; F:pyridoxal phosphate binding; F:1-aminocyclopropane-1-carboxylate synthase activity; P:cellular amino acid metabolic process	EC:4.4.1.14	1-aminocyclopropane-1-carboxylate synthase
Les.1842.1.S1_at	101248541	LOC101248541	protein AIG1-like	XM_004250588	Solyc11g028010.1.1																0.000200634	2.46472	2.46472				5.05078e-05	2.63294	2.63294	F:GO:0005525	F:GTP binding
Les.1846.1.A1_at	101261895	LOC101261895	uncharacterized LOC101261895	XM_004235013	Solyc03g078610.2.1																			0.000589174	0.406209	-2.46179
Les.1849.1.A1_at	101260690	LOC101260690	TVP38/TMEM64 family membrane protein slr0305-like	XM_004250652	---																0.00684632	2.04228	2.04228				0.00330472	2.11817	2.11817
Les.1853.1.S1_at	101260988	LOC101260988	nuclear transcription factor Y subunit A-7-like	XM_004233119	Solyc02g069860.2.1																			0.000234699	3.07349	3.07349				C:GO:0016602; F:GO:0003677; F:GO:0003700; P:GO:0006355; P:GO:0006355	C:CCAAT-binding factor complex; F:DNA binding; F:transcription factor activity, sequence-specific DNA binding; P:regulation of transcription, DNA-templated; P:regulation of transcription, DNA-templated
Les.1857.1.A1_at	101266519	LOC101266519	alternative NAD(P)H dehydrogenase 2, mitochondrial-like	XM_004240356	Solyc06g007160.2.1																			2.521e-06	0.214848	-4.65446	4.86947e-05	0.285582	-3.50162	F:GO:0016491; P:GO:0055114	F:oxidoreductase activity; P:oxidation-reduction process
Les.1859.2.S1_at	101268013	LOC101268013	cytochrome P450 CYP72A219-like	XM_004244224	Solyc07g062500.2.1	0.00452112	6.38495	6.38495	0.0168101	4.26589	4.26589	0.00313337	5.87326	5.87326	0.00619378	4.89179	4.89179				2.93434e-05	18.9033	18.9033	2.2667e-05	16.5421	16.5421	4.06966e-07	44.1429	44.1429	F:GO:0005506; F:GO:0016705; C:GO:0016021; P:GO:0055114; F:GO:0004497; F:GO:0020037	F:iron ion binding; F:oxidoreductase activity, acting on paired donors, with incorporation or reduction of molecular oxygen; C:integral component of membrane; P:oxidation-reduction process; F:monooxygenase activity; F:heme binding
Les.1864.1.S1_at	101252303	LOC101252303	transcription factor PIF4	XM_004243583	Solyc07g043580.2.1																			0.000325809	2.06668	2.06668				F:GO:0046983	F:protein dimerization activity
Les.187.1.S1_at	101264077	LOC101264077	uncharacterized LOC101264077	XM_004249074	Solyc10g078300.1.1																0.00811871	0.225956	-4.42563				0.00782377	0.240796	-4.1529	F:GO:0003676; C:GO:0016021	F:nucleic acid binding; C:integral component of membrane
Les.1870.1.A1_at	101260939	LOC101260939	exosome complex component MTR3-like	XM_004240337 /// XM_004240338	Solyc06g005860.1.1	0.0121376	2.84793	2.84793										0.034833	2.16057	2.16057										C:GO:0000177; C:GO:0000176; P:GO:0071051; P:GO:0034475; P:GO:0016075; P:GO:0071028; C:GO:0005730; P:GO:0034427; P:GO:0031125	C:cytoplasmic exosome (RNase complex); C:nuclear exosome (RNase complex); P:polyadenylation-dependent snoRNA 3'-end processing; P:U4 snRNA 3'-end processing; P:rRNA catabolic process; P:nuclear mRNA surveillance; C:nucleolus; P:nuclear-transcribed mRNA catabolic process, exonucleolytic, 3'-5'; P:rRNA 3'-end processing
Les.1871.1.S1_at	101264584	LOC101264584	RING-H2 finger protein ATL80-like	XM_004232537	Solyc02g082420.2.1				0.000980178	0.368211	-2.71584				0.000703496	2.633	2.633				0.0048218	0.452443	-2.21022	0.00727805	0.496591	-2.01373	0.00714544	0.489536	-2.04275	F:GO:0008270; C:GO:0016021; F:GO:0016874	F:zinc ion binding; C:integral component of membrane; F:ligase activity
Les.1875.1.S1_at	101254317	LOC101254317	thioredoxin M4, chloroplastic-like	XM_004244178	Solyc07g063190.2.1																						6.15834e-06	0.484388	-2.06446	C:GO:0009507; P:GO:0006118; F:GO:0015035; P:GO:0006662; F:GO:0016671; P:GO:0034599; P:GO:0045454; P:GO:0055114; P:GO:0006457; P:GO:0000103	C:chloroplast; P:obsolete electron transport; F:protein disulfide oxidoreductase activity; P:glycerol ether metabolic process; F:oxidoreductase activity, acting on a sulfur group of donors, disulfide as acceptor; P:cellular response to oxidative stress; P:cell redox homeostasis; P:oxidation-reduction process; P:protein folding; P:sulfate assimilation
Les.1880.1.A1_at	101264390	LOC101264390	pollen-specific leucine-rich repeat extensin-like protein 1	XM_004250244 /// XM_004250245	Solyc11g012680.1.1							0.00288829	2.7985	2.7985							0.00139112	3.2519	3.2519	0.000197203	3.83844	3.83844	0.000369561	3.63257	3.63257	P:GO:0046916; F:GO:0046914; F:GO:0046872; C:GO:0005737; P:GO:0030001	P:cellular transition metal ion homeostasis; F:transition metal ion binding; F:metal ion binding; C:cytoplasm; P:metal ion transport
Les.1884.1.S1_at	101257314	LOC101257314	DNA-binding protein HEXBP-like	XM_004248639 /// XM_004248640	Solyc10g054330.1.1																0.0103771	0.497866	-2.00857							F:GO:0003676; F:GO:0008270	F:nucleic acid binding; F:zinc ion binding
Les.1888.1.A1_at	---	---	Protein kinase-like	---	Solyc02g084400.2.1																0.0472886	2.17542	2.17542
Les.1891.1.A1_at	101268842	LOC101268842	transmembrane protein 184C-like	XM_004251453	Solyc12g005590.1.1										0.0401859	2.26462	2.26462				0.00293997	3.81879	3.81879	0.0197795	2.56544	2.56544	0.00040372	4.89726	4.89726	C:GO:0016020; C:GO:0016021; P:GO:0009626; P:GO:0006810; F:GO:0005215	C:membrane; C:integral component of membrane; P:plant-type hypersensitive response; P:transport; F:transporter activity
Les.1897.1.A1_at	101259654	LOC101259654	mitochondrial import inner membrane translocase subunit tim-16-like	XM_004244422	Solyc08g006120.2.1																0.0376069	4.35988	4.35988							C:GO:0005744; P:GO:0030150	C:mitochondrial inner membrane presequence translocase complex; P:protein import into mitochondrial matrix
Les.1898.2.A1_at	101243704	LOC101243704	probable ubiquitin-conjugating enzyme E2 16-like	XM_004238242	Solyc04g080810.2.1																0.0197329	2.46745	2.46745	0.0228829	2.27504	2.27504	0.00238163	3.23354	3.23354	F:GO:0000166; C:GO:0005634; F:GO:0005524; P:GO:0043161; F:GO:0061630; F:GO:0031625; C:GO:0005737; P:GO:0000209	F:nucleotide binding; C:nucleus; F:ATP binding; P:proteasome-mediated ubiquitin-dependent protein catabolic process; F:ubiquitin protein ligase activity; F:ubiquitin protein ligase binding; C:cytoplasm; P:protein polyubiquitination
Les.190.1.S1_at	543964	PSY2	phytoene synthase 2, chloroplastic	NM_001247742	Solyc02g081330.2.1																			0.000945378	0.297892	-3.35692	2.79385e-05	0.182665	-5.47449	P:GO:0016117; F:GO:0016767; C:GO:0009507; P:GO:0006694; P:GO:0016102	P:carotenoid biosynthetic process; F:geranylgeranyl-diphosphate geranylgeranyltransferase activity; C:chloroplast; P:steroid biosynthetic process; P:diterpenoid biosynthetic process	EC:2.5.1.32; EC:2.5.1.10	15-cis-phytoene synthase; (2E,6E)-farnesyl diphosphate synthase
Les.1900.1.S1_at	101264616	LOC101264616	MLP-like protein 34-like	XM_004236969	Solyc04g005700.2.1				0.0105039	0.231493	-4.31979	0.0376718	0.332391	-3.00851							0.00146746	0.14945	-6.69122				0.000385318	0.124508	-8.03159	P:GO:0009607; P:GO:0006952	P:response to biotic stimulus; P:defense response
Les.1902.1.A1_at	101250657	LOC101250657	small nuclear ribonucleoprotein Sm D3-like	XM_004233505	Solyc02g062240.2.1																0.00139265	3.38682	3.38682							C:GO:0005682; C:GO:0005681; P:GO:0006396; C:GO:0005686; C:GO:0005685; P:GO:0000245; P:GO:0000387; C:GO:0005687; C:GO:0000243; C:GO:0071010; C:GO:0005689; F:GO:0003723; C:GO:0034715; C:GO:0030529; C:GO:0071013; C:GO:0071011; C:GO:0034719; C:GO:0097526	C:U5 snRNP; C:spliceosomal complex; P:RNA processing; C:U2 snRNP; C:U1 snRNP; P:spliceosomal complex assembly; P:spliceosomal snRNP assembly; C:U4 snRNP; C:commitment complex; C:prespliceosome; C:U12-type spliceosomal complex; F:RNA binding; C:pICln-Sm protein complex; C:intracellular ribonucleoprotein complex; C:catalytic step 2 spliceosome; C:precatalytic spliceosome; C:SMN-Sm protein complex; …
Les.1906.1.S1_at	101262690	LOC101262690	probable histone H2A.1-like	XM_004251432	Solyc12g005270.1.1																						0.00179534	0.440155	-2.27192	F:GO:0003677; C:GO:0000790; F:GO:0046982; P:GO:0006342; C:GO:0000786	F:DNA binding; C:nuclear chromatin; F:protein heterodimerization activity; P:chromatin silencing; C:nucleosome
Les.191.1.S1_at	544035	EXP1	expansin	NM_001247029	Solyc06g051800.2.1																						0.000303665	5.53102	5.53102	C:GO:0005618; C:GO:0016020; P:GO:0009664; C:GO:0005576	C:cell wall; C:membrane; P:plant-type cell wall organization; C:extracellular region
Les.1910.2.S1_at	101257722	LOC101257722	uncharacterized LOC101257722	XR_182462	Solyc02g085310.2.1	0.0189975	2.67438	2.67438							0.00462028	0.334348	-2.9909
Les.1912.1.A1_at	101257045	LOC101257045	uncharacterized LOC101257045	XM_004251834	Solyc12g014110.1.1										0.0114154	2.9257	2.9257				0.00468002	3.70028	3.70028	0.0117179	2.91255	2.91255	0.00434112	3.51919	3.51919	P:GO:0055085; P:GO:0055074; F:GO:0005509; C:GO:0016020; P:GO:0006816; C:GO:0016021; P:GO:0035725; F:GO:0005432	P:transmembrane transport; P:calcium ion homeostasis; F:calcium ion binding; C:membrane; P:calcium ion transport; C:integral component of membrane; P:sodium ion transmembrane transport; F:calcium:sodium antiporter activity
Les.1914.1.S1_at	101254412	LOC101254412	uncharacterized LOC101254412	XM_004245969	Solyc08g075340.2.1																2.2134e-05	2.30876	2.30876							P:GO:0052325; C:GO:0005802; C:GO:0005768; C:GO:0016021; P:GO:0006486; P:GO:0080147; F:GO:0052636	P:cell wall pectin biosynthetic process; C:trans-Golgi network; C:endosome; C:integral component of membrane; P:protein glycosylation; P:root hair cell development; F:arabinosyltransferase activity
Les.192.2.S1_at	101259198	LOC101259198	uncharacterized LOC101259198	XM_004230208 /// XM_004230209	Solyc01g099840.2.1										0.011299	0.33695	-2.9678				0.0408324	0.400943	-2.49412							C:GO:0005634; P:GO:0009749; P:GO:0009750; P:GO:0007275; P:GO:0009744	C:nucleus; P:response to glucose; P:response to fructose; P:multicellular organism development; P:response to sucrose
Les.1925.2.S1_at	778229	DHAR1	dehydroascorbate reductase	NM_001247893	Solyc05g054760.2.1																						0.0450779	0.344052	-2.90654	F:GO:0045174; P:GO:0006803; P:GO:0006118; C:GO:0005737; P:GO:0006749; P:GO:0098869; F:GO:0004364; P:GO:0055114; P:GO:0019852	F:glutathione dehydrogenase (ascorbate) activity; P:obsolete glutathione conjugation reaction; P:obsolete electron transport; C:cytoplasm; P:glutathione metabolic process; P:cellular oxidant detoxification; F:glutathione transferase activity; P:oxidation-reduction process; P:L-ascorbic acid metabolic process	EC:2.5.1.18; EC:1.8.5.1	Glutathione transferase; Glutathione dehydrogenase (ascorbate)
Les.1926.1.A1_at	101268341	LOC101268341	uncharacterized LOC101268341	XM_004232803 /// XM_004232804	---							0.0413208	2.08526	2.08526	0.0339412	2.12465	2.12465				0.00711939	2.87728	2.87728				0.0466572	2.04379	2.04379
Les.1929.3.S1_at	101257684	LOC101257684	porphobilinogen deaminase, chloroplastic-like	XM_004243933	Solyc07g066470.2.1																0.00898453	0.0581419	-17.1993				0.004135	0.0486119	-20.5711	C:GO:0009570; P:GO:0015994; P:GO:0018160; F:GO:0004418; C:GO:0048046; C:GO:0009941; P:GO:0033014	C:chloroplast stroma; P:chlorophyll metabolic process; P:peptidyl-pyrromethane cofactor linkage; F:hydroxymethylbilane synthase activity; C:apoplast; C:chloroplast envelope; P:tetrapyrrole biosynthetic process	EC:2.5.1.61	Hydroxymethylbilane synthase
Les.193.3.S1_a_at	101252541	LOC101252541	DEAD-box ATP-dependent RNA helicase 38-like	XM_004249541	Solyc10g085790.1.1																0.0479421	0.382024	-2.61763							F:GO:0003676; F:GO:0005524; C:GO:0005737; P:GO:0010501; C:GO:0005730; F:GO:0004004	F:nucleic acid binding; F:ATP binding; C:cytoplasm; P:RNA secondary structure unwinding; C:nucleolus; F:ATP-dependent RNA helicase activity	EC:3.6.1.3; EC:3.6.1.15	Adenosinetriphosphatase; Nucleoside-triphosphate phosphatase
Les.1930.1.A1_at	101245066	LOC101245066	2-isopropylmalate synthase B-like	XM_004240947	Solyc06g053400.2.1																						0.0118609	2.2761	2.2761	F:GO:0003852; P:GO:0009097; F:GO:0003824; P:GO:0009099; P:GO:0009098; F:GO:0046912; P:GO:0006090	F:2-isopropylmalate synthase activity; P:isoleucine biosynthetic process; F:catalytic activity; P:valine biosynthetic process; P:leucine biosynthetic process; F:transferase activity, transferring acyl groups, acyl groups converted into alkyl on transfer; P:pyruvate metabolic process	EC:2.3.3.13	2-isopropylmalate synthase
Les.1934.1.A1_at	101262905	LOC101262905	probable LRR receptor-like serine/threonine-protein kinase At1g34110-like	XM_004253216	Solyc00g009090.2.1										0.0313076	3.38614	3.38614
Les.1936.1.S1_at	101257109	ELIP	early light-induced protein	XM_004247556 /// XM_004247557 /// XM_004247558 /// XM_004247559	Solyc09g082690.2.1							0.0013072	0.153133	-6.53029	0.00159918	0.164972	-6.06165													C:GO:0016021	C:integral component of membrane
Les.1938.1.A1_at	101250544	LOC101250544	uncharacterized LOC101250544	XM_004247467	Solyc09g072640.2.1																						0.00537578	4.35646	4.35646
Les.194.1.S1_at	543657	LOC543657	uncharacterized LOC543657	NM_001247540	Solyc01g096480.2.1																			9.46557e-05	0.430733	-2.32162	0.000149423	0.43892	-2.27832	C:GO:0009295; P:GO:0034051; F:GO:0015035; P:GO:0006662; P:GO:0045454; P:GO:0006457; P:GO:0006952; P:GO:0000103; P:GO:0009657; C:GO:0009579; C:GO:0009507; P:GO:0006118; F:GO:0005515; P:GO:0008219; F:GO:0047134; F:GO:0016671; P:GO:0034599; P:GO:0055114	C:nucleoid; P:negative regulation of plant-type hypersensitive response; F:protein disulfide oxidoreductase activity; P:glycerol ether metabolic process; P:cell redox homeostasis; P:protein folding; P:defense response; P:sulfate assimilation; P:plastid organization; C:thylakoid; C:chloroplast; P:obsolete electron transport; F:protein binding; P:cell death; F:protein-disulfide reductase activity; …	EC:1.8.1.8	Protein-disulfide reductase
Les.1942.1.S1_at	101250327	LOC101250327	mitochondrial outer membrane protein porin of 36 kDa-like	XM_004228338	Solyc01g010760.2.1																1.27543e-05	2.91627	2.91627							F:GO:0008308; P:GO:1903959; F:GO:0015288; P:GO:0055085; C:GO:0046930; C:GO:0005741; P:GO:0006820	F:voltage-gated anion channel activity; P:regulation of anion transmembrane transport; F:porin activity; P:transmembrane transport; C:pore complex; C:mitochondrial outer membrane; P:anion transport
Les.195.1.S1_at	101246665	LOC101246665	BAG family molecular chaperone regulator 6-like	XM_004229915	Solyc01g095320.2.1							0.0328109	0.420527	-2.37797													0.00495356	3.27923	3.27923	F:GO:0005516; C:GO:0009506; F:GO:0051087; P:GO:0010228; P:GO:0012502; P:GO:0050832	F:calmodulin binding; C:plasmodesma; F:chaperone binding; P:vegetative to reproductive phase transition of meristem; P:induction of programmed cell death; P:defense response to fungus
Les.1952.1.S1_at	101253905	LOC101253905	60S ribosomal export protein NMD3-like	XM_004240978 /// XM_004240979	Solyc06g053800.1.1																0.00102272	2.02901	2.02901				0.000493003	2.06875	2.06875	C:GO:0005634; P:GO:0000055; C:GO:0005737; F:GO:0043023	C:nucleus; P:ribosomal large subunit export from nucleus; C:cytoplasm; F:ribosomal large subunit binding
Les.1955.1.A1_at	101255376	LOC101255376	uncharacterized LOC101255376	XM_010319984	Solyc03g097180.2.1										0.010902	2.11856	2.11856				0.00855373	2.30087	2.30087	0.0146536	2.04463	2.04463	0.000277302	3.2755	3.2755
Les.1959.1.A1_at	100037513	TCP3	TCP transcription factor 3	NM_001247438	Solyc12g014140.1.1	0.000281541	2.77658	2.77658																			0.000121314	0.366447	-2.72891	C:GO:0005634; F:GO:0003677; P:GO:0006351; P:GO:0006355	C:nucleus; F:DNA binding; P:transcription, DNA-templated; P:regulation of transcription, DNA-templated
Les.1966.1.A1_at	101264385	LOC101264385	uncharacterized LOC101264385	XM_004231586	Solyc02g037550.2.1													0.0226963	7.41804	7.41804							0.0475174	5.73748	5.73748	P:GO:0055085; C:GO:0016020; C:GO:0016021	P:transmembrane transport; C:membrane; C:integral component of membrane
Les.1967.1.A1_at	101265794	LOC101265794	polygalacturonase QRT3	XM_004233219	Solyc02g068400.2.1										0.000130637	5.54051	5.54051
Les.1971.1.S1_at	101250934	LOC101250934	amidophosphoribosyltransferase 2, chloroplastic-like	XM_004230854	Solyc01g110520.2.1							0.00104604	2.02849	2.02849																P:GO:0006536; P:GO:0009116; P:GO:0006541; F:GO:0004044; P:GO:0009113	P:glutamate metabolic process; P:nucleoside metabolic process; P:glutamine metabolic process; F:amidophosphoribosyltransferase activity; P:purine nucleobase biosynthetic process	EC:2.4.2.14	Amidophosphoribosyltransferase
Les.1972.1.S1_at	101260575	LOC101260575	uncharacterized LOC101260575	XM_004229961	Solyc01g096240.2.1																			5.06823e-05	0.344713	-2.90097	1.50647e-07	0.195436	-5.11678	C:GO:0009706; C:GO:0009534; C:GO:0016021	C:chloroplast inner membrane; C:chloroplast thylakoid; C:integral component of membrane
Les.1978.2.S1_at	101251751	LOC101251751	adenylate kinase, chloroplastic-like	XM_004233956	Solyc03g005050.2.1																0.0495109	0.261343	-3.8264				0.0282859	0.236255	-4.23272	F:GO:0005524; P:GO:0016310; F:GO:0019205; P:GO:0006139	F:ATP binding; P:phosphorylation; F:nucleobase-containing compound kinase activity; P:nucleobase-containing compound metabolic process
Les.1980.1.A1_at	101263855	LOC101263855	AT-rich interactive domain-containing protein 1-like	XM_004231141	Solyc01g094820.2.1																0.0433328	2.69044	2.69044							C:GO:0005634; F:GO:0003677	C:nucleus; F:DNA binding
Les.1987.1.S1_at	---	---	Unknown Protein	---	Solyc03g112220.1.1																			0.000993689	0.29444	-3.39628
Les.1997.3.A1_at	101262304	LOC101262304	calreticulin-3-like	XM_004237506 /// XM_004237507	Solyc04g048900.2.1	0.00387132	0.151811	-6.58712													0.00635407	5.40192	5.40192				0.00371708	5.62699	5.62699	F:GO:0005509; C:GO:0005783; F:GO:0051082; P:GO:0006457	F:calcium ion binding; C:endoplasmic reticulum; F:unfolded protein binding; P:protein folding
Les.1999.1.A1_at	101249736	LOC101249736	golgin candidate 5-like	XM_004241689	Solyc06g066610.2.1																0.0292755	2.90436	2.90436				0.0433014	2.54337	2.54337	C:GO:0005634; C:GO:0005737; C:GO:0005794	C:nucleus; C:cytoplasm; C:Golgi apparatus
Les.20.1.S1_at	543629	zds	zeta-carotene desaturase	NM_001247454	Solyc01g097810.2.1																0.0107843	0.448453	-2.22989				0.00990994	0.461333	-2.16763	C:GO:0009509; P:GO:0016117; F:GO:0052886; C:GO:0009941; F:GO:0016719; P:GO:0055114; P:GO:0006694; P:GO:0052889; F:GO:0016720; F:GO:0052887	C:chromoplast; P:carotenoid biosynthetic process; F:9,9'-dicis-carotene:quinone oxidoreductase activity; C:chloroplast envelope; F:carotene 7,8-desaturase activity; P:oxidation-reduction process; P:steroid biosynthetic process; P:9,9'-di-cis-zeta-carotene desaturation to 7,9,7',9'-tetra-cis-lycopene; F:delta12-fatty acid dehydrogenase activity; F:7,9,9'-tricis-neurosporene:quinone oxidoreductase …	EC:1.3.5.6; EC:1.14.99.33; EC:1.14.99.30	9,9'-di-cis-zeta-carotene desaturase; Acting on paired donors, with incorporation or reduction of molecular oxygen. The oxygen incorporated need not be derived from O(2); Acting on paired donors, with incorporation or reduction of molecular oxygen. The oxygen incorporated need not be derived from O(2)
Les.2001.1.S1_s_at	778362	LOC778362	uncharacterized LOC778362	NM_001247382	Solyc10g086570.2.1	0.0128567	0.125752	-7.95214													0.0317702	0.278161	-3.59504	0.00578743	0.20286	-4.92952	0.000637016	0.120884	-8.27239	F:GO:0031072; C:GO:0016021; F:GO:0051082; C:GO:0009535	F:heat shock protein binding; C:integral component of membrane; F:unfolded protein binding; C:chloroplast thylakoid membrane
Les.2002.2.S1_at	101261490	LOC101261490	mediator of RNA polymerase II transcription subunit 36a-like	XM_004234382	Solyc03g025270.2.1	2.48294e-05	3.0013	3.0013										0.0290106	2.02424	2.02424										C:GO:0032040; P:GO:0006351; P:GO:0008033; C:GO:0015030; P:GO:0006355; C:GO:0031428; F:GO:0008649; P:GO:0000494; F:GO:0030515; P:GO:1990258; F:GO:1990259; C:GO:0016020; P:GO:0031167; C:GO:0005829	C:small-subunit processome; P:transcription, DNA-templated; P:tRNA processing; C:Cajal body; P:regulation of transcription, DNA-templated; C:box C/D snoRNP complex; F:rRNA methyltransferase activity; P:box C/D snoRNA 3'-end processing; F:snoRNA binding; P:histone glutamine methylation; F:histone-glutamine methyltransferase activity; C:membrane; P:rRNA methylation; C:cytosol
Les.2003.1.A1_at	101252129	LOC101252129	codeine O-demethylase	XM_004249037	Solyc10g076840.1.1																						0.0336816	2.81359	2.81359	F:GO:0016491; F:GO:0046872; P:GO:0055114	F:oxidoreductase activity; F:metal ion binding; P:oxidation-reduction process
Les.2012.1.S1_at	544226	IPS	inositol-3-phosphate synthase	XM_004237370	Solyc04g054740.2.1							0.000645274	0.267791	-3.73425							0.000764477	0.256722	-3.89526	1.94001e-06	0.12424	-8.04891				P:GO:0010264; P:GO:0006021; P:GO:0009793; P:GO:0008654; P:GO:0009644; P:GO:0042542; P:GO:0042742; P:GO:0009733; F:GO:0004512; P:GO:0009408; F:GO:0005515; C:GO:0005737; P:GO:0019872; P:GO:0051607; P:GO:0016036; P:GO:0050832	P:myo-inositol hexakisphosphate biosynthetic process; P:inositol biosynthetic process; P:embryo development ending in seed dormancy; P:phospholipid biosynthetic process; P:response to high light intensity; P:response to hydrogen peroxide; P:defense response to bacterium; P:response to auxin; F:inositol-3-phosphate synthase activity; P:response to heat; F:protein binding; C:cytoplasm; P:streptomyc…	EC:5.5.1.4	Inositol-3-phosphate synthase
Les.2017.1.A1_at	101260820	LOC101260820	uncharacterized LOC101260820	XM_004239905	Solyc05g052460.2.1																0.0127688	2.21034	2.21034							C:GO:0016020; C:GO:0016021	C:membrane; C:integral component of membrane
Les.2019.1.A1_at	101252005	LOC101252005	probable polyamine oxidase 2	XM_004243582	Solyc07g043590.2.1																			0.032452	2.0487	2.0487	0.00119104	3.28483	3.28483	F:GO:0016491; P:GO:0055114	F:oxidoreductase activity; P:oxidation-reduction process
Les.2021.1.A1_at	101259675	LOC101259675	bifunctional epoxide hydrolase 2	XM_004230210	Solyc01g099910.2.1																0.0440671	2.27884	2.27884							F:GO:0003824	F:catalytic activity
Les.2026.2.A1_at	101262152	LOC101262152	E3 ubiquitin-protein ligase RMA1H1-like	XM_004248113	Solyc10g008400.1.1				0.0403874	3.20338	3.20338										0.00256541	6.44957	6.44957	0.038326	0.332321	-3.00914	0.00137547	6.75229	6.75229	F:GO:1904264; F:GO:0044390; F:GO:0046872; C:GO:0016020; C:GO:0016021; P:GO:0030433; P:GO:0042787; P:GO:0071712; C:GO:0036513	F:ubiquitin protein ligase activity involved in ERAD pathway; F:ubiquitin-like protein conjugating enzyme binding; F:metal ion binding; C:membrane; C:integral component of membrane; P:ER-associated ubiquitin-dependent protein catabolic process; P:protein ubiquitination involved in ubiquitin-dependent protein catabolic process; P:ER-associated misfolded protein catabolic process; C:Derlin-1 retrot…
Les.2027.2.S1_s_at	101260974	LOC101260974	plasma membrane-associated cation-binding protein 1-like	XM_004248365 /// XM_004248366 /// XM_004248367	Solyc10g005100.2.1	0.0276658	2.51922	2.51922							0.0245324	0.429111	-2.3304				0.00307212	0.287723	-3.47556							P:GO:0051716; C:GO:0046658	P:cellular response to stimulus; C:anchored component of plasma membrane
Les.203.1.S1_at	543959	TPX2	peroxidase	NM_001247715	Solyc07g047740.2.1										0.0430738	0.433573	-2.30642										0.0101808	0.328416	-3.04492	F:GO:0004601; P:GO:0006979; F:GO:0046872; P:GO:0006804; P:GO:0098869; P:GO:0009664; P:GO:0055114; C:GO:0005576; C:GO:0009505; F:GO:0020037; P:GO:0042744	F:peroxidase activity; P:response to oxidative stress; F:metal ion binding; P:obsolete peroxidase reaction; P:cellular oxidant detoxification; P:plant-type cell wall organization; P:oxidation-reduction process; C:extracellular region; C:plant-type cell wall; F:heme binding; P:hydrogen peroxide catabolic process	EC:1.11.1.7	Peroxidase
Les.2033.3.S1_at	101248710	LOC101248710	histone H1-like	XM_004247177	Solyc09g066100.2.1																0.0399408	0.395096	-2.53103	0.0322599	0.402801	-2.48261	0.00170763	0.235604	-4.24442	C:GO:0005634; F:GO:0003677; C:GO:0005694; C:GO:0000786; P:GO:0006334	C:nucleus; F:DNA binding; C:chromosome; C:nucleosome; P:nucleosome assembly
Les.2034.2.S1_at	101248164	LOC101248164	F-box protein At5g46170-like	XM_004233076	Solyc02g070480.2.1																0.00840812	0.199437	-5.0141				0.0107819	0.22832	-4.37982	C:GO:0005634	C:nucleus
Les.2037.1.A1_at	101256722	LOC101256722	translocon-associated protein subunit alpha-like	XM_004230875	Solyc01g111150.2.1																5.49275e-06	2.96474	2.96474				0.000172718	2.19181	2.19181	C:GO:0005789; P:GO:0006613; C:GO:0016020; C:GO:0016021; C:GO:0005783	C:endoplasmic reticulum membrane; P:cotranslational protein targeting to membrane; C:membrane; C:integral component of membrane; C:endoplasmic reticulum
Les.2038.1.A1_at	101244636	LOC101244636	GDSL esterase/lipase At5g45950-like	XM_004232898	Solyc02g077330.2.1																			0.000755146	0.237946	-4.20264	0.0321964	0.425267	-2.35146	F:GO:0016788	F:hydrolase activity, acting on ester bonds
Les.204.1.S1_at	543968	LOC543968	ADP-glucose pyrophosphorylase small subunit	NM_001247767	Solyc07g056140.2.1																						0.000510986	0.439305	-2.27632	F:GO:0005524; C:GO:0009507; P:GO:0005978; P:GO:0019252; C:GO:0009501; F:GO:0008878; P:GO:0005985	F:ATP binding; C:chloroplast; P:glycogen biosynthetic process; P:starch biosynthetic process; C:amyloplast; F:glucose-1-phosphate adenylyltransferase activity; P:sucrose metabolic process	EC:2.7.7.27	Glucose-1-phosphate adenylyltransferase
Les.2040.1.A1_at	101250904	LOC101250904	cyclin-T1-3-like	XM_004243127	Solyc07g032480.2.1																0.00829572	3.19987	3.19987				0.00645019	3.15464	3.15464	C:GO:0005634; P:GO:0045737; F:GO:0016538; P:GO:1901409; P:GO:0051726; C:GO:0000307; P:GO:0045944	C:nucleus; P:positive regulation of cyclin-dependent protein serine/threonine kinase activity; F:cyclin-dependent protein serine/threonine kinase regulator activity; P:positive regulation of phosphorylation of RNA polymerase II C-terminal domain; P:regulation of cell cycle; C:cyclin-dependent protein kinase holoenzyme complex; P:positive regulation of transcription from RNA polymerase II promoter
Les.2044.1.A1_at	101251722	LOC101251722	potassium channel AKT2/3-like	XM_004230437	Solyc01g104030.2.1				0.0349691	2.13522	2.13522				0.00309658	2.58528	2.58528				0.020751	2.14161	2.14161				0.000721821	3.13459	3.13459	P:GO:0055085; P:GO:0071805; C:GO:0008076; F:GO:0005244; P:GO:0006810; F:GO:0005267; P:GO:0006813; F:GO:0005249; F:GO:0005216; P:GO:0006811; P:GO:0042391; C:GO:0016021; P:GO:0034765	P:transmembrane transport; P:potassium ion transmembrane transport; C:voltage-gated potassium channel complex; F:voltage-gated ion channel activity; P:transport; F:potassium channel activity; P:potassium ion transport; F:voltage-gated potassium channel activity; F:ion channel activity; P:ion transport; P:regulation of membrane potential; C:integral component of membrane; P:regulation of ion trans…
Les.2045.1.A1_at	101244401	LOC101244401	37S ribosomal protein S22, mitochondrial-like	XM_004245428	Solyc08g082880.2.1																						0.00125045	2.25236	2.25236	F:GO:0008168; P:GO:0032259; P:GO:0006412	F:methyltransferase activity; P:methylation; P:translation
Les.2055.1.S1_at	101247773	LOC101247773	F-box protein SKIP2-like	XM_004231830	Solyc02g092990.1.1																0.0123139	2.25483	2.25483							F:GO:0005515; C:GO:0005737; P:GO:0006511	F:protein binding; C:cytoplasm; P:ubiquitin-dependent protein catabolic process
Les.2063.1.A1_at	101249698	LOC101249698	E3 ubiquitin-protein ligase COP1-like	XM_004250195//XM_010314431//XM_010314432	Solyc11g011980.1.1										0.0243792	2.98814	2.98814
Les.2066.1.A1_at	101264371	LOC101264371	uncharacterized LOC101264371	XM_004247723	Solyc09g090690.2.1	0.0379171	3.65383	3.65383													0.027302	3.7673	3.7673
Les.207.1.S1_at	101253225	LOC101253225	stem-specific protein TSJT1-like	XM_004229380	Solyc01g079880.2.1																			2.95986e-05	2.88274	2.88274				F:GO:0042803; P:GO:0006529; P:GO:0006541; C:GO:0005829; P:GO:0006531; F:GO:0004066; P:GO:0006522	F:protein homodimerization activity; P:asparagine biosynthetic process; P:glutamine metabolic process; C:cytosol; P:aspartate metabolic process; F:asparagine synthase (glutamine-hydrolyzing) activity; P:alanine metabolic process	EC:6.3.5.4	Asparagine synthase (glutamine-hydrolyzing)
Les.2072.1.A1_at	101252412	LOC101252412	uncharacterized LOC101252412	XM_004243857	Solyc07g042910.2.1																0.00273886	2.623	2.623				0.00403225	2.39554	2.39554	C:GO:0016020; C:GO:0016021; C:GO:0005783; C:GO:0005794; P:GO:0010584	C:membrane; C:integral component of membrane; C:endoplasmic reticulum; C:Golgi apparatus; P:pollen exine formation
Les.2073.3.A1_at	101257806	LOC101257806	desumoylating isopeptidase 1-like	XM_004247041	Solyc09g061310.2.1																			0.000763652	2.37185	2.37185	0.000268749	2.65205	2.65205	C:GO:0005634; C:GO:0005737	C:nucleus; C:cytoplasm
Les.2074.2.S1_at	101262213	LOC101262213	fruit protein pKIWI502-like	XM_004238820	Solyc05g008450.2.1																0.00818737	0.141824	-7.05099				0.0117743	0.172513	-5.79666	C:GO:0009570; F:GO:0005507; F:GO:0016491; C:GO:0009941; P:GO:0055114; P:GO:0009735; C:GO:0009579	C:chloroplast stroma; F:copper ion binding; F:oxidoreductase activity; C:chloroplast envelope; P:oxidation-reduction process; P:response to cytokinin; C:thylakoid
Les.208.1.S1_at	544187	TFHS1	heat shock protein	XM_004247362	Solyc09g075210.2.1										0.0096452	0.178464	-5.60338				0.00992301	0.159732	-6.26049							P:GO:0006950	P:response to stress
Les.2084.1.S1_at	101248665	LOC101248665	NAC transcription factor 29-like	XM_004236996	Solyc04g005610.2.1																			0.0136796	3.17181	3.17181	0.0302166	2.76083	2.76083	C:GO:0005634; F:GO:0003677; P:GO:0006351; P:GO:0006355	C:nucleus; F:DNA binding; P:transcription, DNA-templated; P:regulation of transcription, DNA-templated
Les.2085.1.A1_at	101265307	LOC101265307	nicalin-1-like	XM_004251027	Solyc11g068670.1.1																0.0152471	2.03691	2.03691							C:GO:0005789; C:GO:0016020; C:GO:0016021; P:GO:0009966	C:endoplasmic reticulum membrane; C:membrane; C:integral component of membrane; P:regulation of signal transduction
Les.2090.3.A1_at	101262362	LOC101262362	thioredoxin M3, chloroplastic-like	XM_004230725	Solyc01g108020.2.1																0.0125522	2.58392	2.58392	0.0124702	2.43257	2.43257				F:GO:0015035; P:GO:0006662; F:GO:0004791; P:GO:0045454; F:GO:0008047; P:GO:0006118; P:GO:0006206; C:GO:0005737; P:GO:0043085; F:GO:0047134; P:GO:0098869; P:GO:0034599; F:GO:0016671; P:GO:0055114	F:protein disulfide oxidoreductase activity; P:glycerol ether metabolic process; F:thioredoxin-disulfide reductase activity; P:cell redox homeostasis; F:enzyme activator activity; P:obsolete electron transport; P:pyrimidine nucleobase metabolic process; C:cytoplasm; P:positive regulation of catalytic activity; F:protein-disulfide reductase activity; P:cellular oxidant detoxification; P:cellular r…	EC:1.8.1.9; EC:1.8.1.8	Thioredoxin-disulfide reductase; Protein-disulfide reductase
Les.2091.1.S1_at	101261007	LOC101261007	squamosa promoter-binding-like protein 6-like	XM_004236023	Solyc03g114850.2.1																						0.0194148	0.272197	-3.67381	C:GO:0005634; F:GO:0003677	C:nucleus; F:DNA binding
Les.2092.1.S1_at	101253648	LOC101253648	peroxidase 42-like	XM_004232664	Solyc02g080530.2.1																0.00482878	0.496393	-2.01453							F:GO:0004601; P:GO:0006979; F:GO:0046872; P:GO:0006804; P:GO:0098869; P:GO:0009664; P:GO:0055114; C:GO:0005576; C:GO:0009505; F:GO:0020037; P:GO:0042744	F:peroxidase activity; P:response to oxidative stress; F:metal ion binding; P:obsolete peroxidase reaction; P:cellular oxidant detoxification; P:plant-type cell wall organization; P:oxidation-reduction process; C:extracellular region; C:plant-type cell wall; F:heme binding; P:hydrogen peroxide catabolic process	EC:1.11.1.7	Peroxidase
Les.2095.1.A1_at	101250481	LOC101250481	omega-6 fatty acid desaturase, endoplasmic reticulum-like	XM_004234725	---																						0.0141135	0.457632	-2.18516
Les.2099.2.A1_at	101263096	LOC101263096	ubiquitin-fold modifier 1-like	XM_004253035	Solyc12g096120.1.1																0.000579949	2.53809	2.53809	0.00139988	2.20896	2.20896				C:GO:0005634; C:GO:0005737; P:GO:1990592	C:nucleus; C:cytoplasm; P:protein K69-linked ufmylation
Les.210.1.S1_at	543637	LOC543637	brassinosteroid-regulated protein BRU1	NM_001309868	Solyc09g092520.2.1										0.0262621	0.301486	-3.31691													C:GO:0005618; C:GO:0048046; C:GO:0016021; P:GO:0071555; F:GO:0004553; F:GO:0016762; P:GO:0010411; P:GO:0042546	C:cell wall; C:apoplast; C:integral component of membrane; P:cell wall organization; F:hydrolase activity, hydrolyzing O-glycosyl compounds; F:xyloglucan:xyloglucosyl transferase activity; P:xyloglucan metabolic process; P:cell wall biogenesis	EC:2.4.1.207	Xyloglucan:xyloglucosyl transferase
Les.211.3.S1_at	101254429	LOC101254429	uncharacterized LOC101254429	XM_004230782	Solyc01g108890.2.1																0.0275608	0.437513	-2.28565				0.032078	0.466215	-2.14493	C:GO:0005829	C:cytosol
Les.2110.1.A1_at	100736519	TCP12	TCP transcription factor 12	NM_001246877	Solyc11g020670.1.1	0.016147	0.186669	-5.35707																						P:GO:2000024	P:regulation of leaf development
Les.2112.1.A1_at	101260185	LOC101260185	uncharacterized LOC101260185	XM_010314008	---																						0.0212328	2.12071	2.12071
Les.2113.1.A1_at	101256091	LOC101256091	AT-rich interactive domain-containing protein 1-like	XM_004240050	Solyc05g049960.2.1																0.0261074	2.35462	2.35462							C:GO:0005634; F:GO:0003677	C:nucleus; F:DNA binding
Les.2115.1.S1_at	101262625	LOC101262625	methyl-CpG-binding domain-containing protein 11	XM_004241646	Solyc06g068140.2.1	0.00247233	0.40813	-2.4502													0.000524452	0.361444	-2.76668	0.00131696	0.421882	-2.37033	0.00451438	0.46997	-2.12779	C:GO:0005634; F:GO:0003677	C:nucleus; F:DNA binding
Les.212.1.S1_at	544169	CCS	copper chaperone for superoxide dismutase	XM_004245633 /// XM_004245634	Solyc08g079830.2.1																						0.000390161	0.49712	-2.01159	C:GO:0009570; P:GO:0006825; P:GO:0006801; P:GO:0043085; P:GO:0055114; F:GO:0016532	C:chloroplast stroma; P:copper ion transport; P:superoxide metabolic process; P:positive regulation of catalytic activity; P:oxidation-reduction process; F:superoxide dismutase copper chaperone activity
Les.2121.1.A1_at	543883	LOC543883	defense-signaling glycopeptide hormone precursor	NM_001247446	Solyc06g068520.2.1																			0.0126147	0.499466	-2.00214				P:GO:0007165; C:GO:0005576; P:GO:0006952; F:GO:0005179; C:GO:0005622	P:signal transduction; C:extracellular region; P:defense response; F:hormone activity; C:intracellular
Les.2123.1.A1_at	101252391	LOC101252391	probable E3 ubiquitin-protein ligase HERC1-like	XM_004239113	Solyc05g014030.2.1																0.00317739	2.41016	2.41016				0.00393787	2.25807	2.25807
Les.2127.1.A1_at	101268642	LOC101268642	uncharacterized LOC101268642	XM_004233316	---																0.00825547	4.80063	4.80063	0.0392568	3.02873	3.02873	0.00245392	5.80879	5.80879
Les.213.1.S1_at	778299	LOC778299	metallothionein-like protein	NM_001247121	Solyc06g005470.2.1																			0.0404289	2.69309	2.69309				F:GO:0046872	F:metal ion binding
Les.2131.1.A1_at	101244909	LOC101244909	uncharacterized LOC101244909	XM_004230498	Solyc01g105120.2.1							0.0117518	0.399823	-2.5011	0.00172578	0.310602	-3.21956				1.07119e-05	0.421243	-2.37393	1.57243e-09	4.08354	4.08354
Les.2135.3.S1_at	101268332	LOC101268332	uncharacterized LOC101268332	XM_004231673	Solyc02g049070.2.1										0.0476809	0.348853	-2.86654				0.0278166	0.282376	-3.54138				0.0151323	0.260177	-3.84354	C:GO:0009941; C:GO:0016021; C:GO:0009535	C:chloroplast envelope; C:integral component of membrane; C:chloroplast thylakoid membrane
Les.2137.1.S1_at	543900	Eix1	EIX receptor 1	NM_001247498	Solyc07g008620.1.1				0.0486784	4.43459	4.43459	7.56804e-05	26.988	26.988	0.00687469	7.32039	7.32039				1.60632e-06	102.073	102.073	0.00697639	7.28943	7.28943	0.000715774	14.4359	14.4359	C:GO:0016021	C:integral component of membrane
Les.214.1.S1_at	543762	opr2	opr2 protein	NM_001246939	Solyc01g103390.2.1																			0.010544	0.499724	-2.00111				P:GO:0006118; F:GO:0010181; C:GO:0005737; F:GO:0003959; P:GO:0055114	P:obsolete electron transport; F:FMN binding; C:cytoplasm; F:NADPH dehydrogenase activity; P:oxidation-reduction process	EC:1.6.99.1	NADPH dehydrogenase
Les.2145.1.A1_at	101260762	LOC101260762	E3 ubiquitin-protein ligase CIP8-like	XM_004247417	---																						0.00063217	2.01573	2.01573
Les.2146.1.A1_at	101248229	LOC101248229	sphinganine C(4)-monooxygenase 2-like	XM_004228330 /// XM_004228331	Solyc01g010860.2.1																						0.0244572	2.81078	2.81078	C:GO:0005789; F:GO:0016491; F:GO:0005506; F:GO:0042284; F:GO:0000170; C:GO:0016020; P:GO:0008610; C:GO:0016021; P:GO:0055114; P:GO:0030148	C:endoplasmic reticulum membrane; F:oxidoreductase activity; F:iron ion binding; F:sphingolipid delta-4 desaturase activity; F:sphingosine hydroxylase activity; C:membrane; P:lipid biosynthetic process; C:integral component of membrane; P:oxidation-reduction process; P:sphingolipid biosynthetic process
Les.2147.1.A1_at	101261209	LOC101261209	pentatricopeptide repeat-containing protein At3g18110, chloroplastic	XM_010319965	---							0.0323575	0.479487	-2.08556										0.00460776	0.368951	-2.71039
Les.2153.1.S1_at	101259571	LOC101259571	ENTH/VHS/ANTH family protein	XM_004246897	Solyc09g025240.2.1																			0.00997033	2.02562	2.02562				P:GO:0006886; C:GO:0005622	P:intracellular protein transport; C:intracellular
Les.2161.1.A1_at	101254958	LOC101254958	uncharacterized LOC101254958	XM_004249465 /// XM_004249466	---																			0.0297659	2.29911	2.29911	0.00289878	3.39152	3.39152
Les.2165.1.S1_at	104648938	LOC104648938	uncharacterized LOC104648938	XM_010327048	Solyc08g082570.2.1																0.00530655	0.266197	-3.75662				0.00128356	0.222555	-4.49327
Les.2167.2.A1_at	101258789	LOC101258789	pyrrolidone-carboxylate peptidase-like	XM_004230291 /// XM_004230292	Solyc01g100970.2.1																						0.000766638	2.00057	2.00057	F:GO:0016920; P:GO:0006508; C:GO:0005829	F:pyroglutamyl-peptidase activity; P:proteolysis; C:cytosol	EC:3.4.19	Acting on peptide bonds (peptidases)
Les.2168.1.S1_at	101268297	LOC101268297	photosystem I reaction center subunit N, chloroplastic-like	XM_004244682	Solyc08g013670.2.1																0.0411083	0.490509	-2.0387				7.8627e-06	0.163426	-6.119	C:GO:0009522; P:GO:0015979	C:photosystem I; P:photosynthesis
Les.2169.1.S1_at	101260136	LOC101260136	30S ribosomal protein S13, chloroplastic-like	XM_004238647	Solyc05g005880.2.1																0.021599	0.350909	-2.84974				0.000369863	0.183922	-5.43708	F:GO:0003723; F:GO:0003735; C:GO:0005829; P:GO:0042254; C:GO:0015935; P:GO:0006412	F:RNA binding; F:structural constituent of ribosome; C:cytosol; P:ribosome biogenesis; C:small ribosomal subunit; P:translation
Les.217.1.S1_at	543645	LOC543645	dicyanin	NM_001247500	---																			0.00154761	6.12023	6.12023	0.0238431	3.45277	3.45277	P:GO:0006118; F:GO:0009055; C:GO:0016021	P:obsolete electron transport; F:electron carrier activity; C:integral component of membrane
Les.2170.1.A1_at	101248926	LOC101248926	G2/mitotic-specific cyclin-1-like	XM_004249275	Solyc10g080950.1.1																			0.00532527	0.160519	-6.2298				C:GO:0005634	C:nucleus
Les.2175.1.A1_at	101249374	LOC101249374	ubiquitin carboxyl-terminal hydrolase isozyme L3-like	XM_004241941	Solyc06g060850.2.1																0.00104588	2.28457	2.28457				0.00164711	2.11137	2.11137	F:GO:0004843; P:GO:0016579; C:GO:0005737; P:GO:0006508; F:GO:0008234; F:GO:0008233; C:GO:0005622; F:GO:0016787; P:GO:0006511; F:GO:0036459	F:thiol-dependent ubiquitin-specific protease activity; P:protein deubiquitination; C:cytoplasm; P:proteolysis; F:cysteine-type peptidase activity; F:peptidase activity; C:intracellular; F:hydrolase activity; P:ubiquitin-dependent protein catabolic process; F:thiol-dependent ubiquitinyl hydrolase activity	EC:3.4.19.12	Ubiquitinyl hydrolase 1
Les.218.1.S1_at	101260501	LOC101260501	pectinesterase-like	XR_182479	Solyc02g080200.2.1																						1.17912e-06	0.0548517	-18.231	P:GO:0045490; P:GO:0043086; C:GO:0005618; F:GO:0045330; C:GO:0016021; C:GO:0005576; P:GO:0005982; F:GO:0046910; P:GO:0042545; P:GO:0005985; F:GO:0030599	P:pectin catabolic process; P:negative regulation of catalytic activity; C:cell wall; F:aspartyl esterase activity; C:integral component of membrane; C:extracellular region; P:starch metabolic process; F:pectinesterase inhibitor activity; P:cell wall modification; P:sucrose metabolic process; F:pectinesterase activity	EC:3.1.1.11; EC:3.1.1.1	Pectinesterase; Carboxylesterase
Les.218.2.S1_at	101260197	LOC101260197	pectinesterase-like	XM_004232689	Solyc02g080210.2.1																0.0324656	0.13781	-7.25634				0.000115232	0.0209379	-47.7602	P:GO:0045490; P:GO:0043086; C:GO:0005618; F:GO:0045330; C:GO:0016021; C:GO:0005576; P:GO:0005982; F:GO:0046910; P:GO:0042545; P:GO:0005985; F:GO:0030599	P:pectin catabolic process; P:negative regulation of catalytic activity; C:cell wall; F:aspartyl esterase activity; C:integral component of membrane; C:extracellular region; P:starch metabolic process; F:pectinesterase inhibitor activity; P:cell wall modification; P:sucrose metabolic process; F:pectinesterase activity	EC:3.1.1.11; EC:3.1.1.1	Pectinesterase; Carboxylesterase
Les.2180.2.A1_at	101247776	LOC101247776	NADH dehydrogenase [ubiquinone] iron-sulfur protein 5-B-like	XM_004249853	Solyc11g005880.1.1																0.000243952	2.61178	2.61178							C:GO:0005747; P:GO:0032981	C:mitochondrial respiratory chain complex I; P:mitochondrial respiratory chain complex I assembly
Les.2182.1.A1_at	100736464	PAT	prephenate aminotransferase	NM_001247680	Solyc04g054710.2.1																3.5575e-05	2.06672	2.06672							F:GO:0030170; F:GO:0042802; P:GO:0009094; F:GO:0080130; P:GO:0006560; P:GO:0006571; P:GO:0006531; F:GO:0004069; P:GO:0006534; P:GO:0006522; P:GO:0009821; C:GO:0009507; P:GO:0006107; P:GO:0006525; P:GO:0006536; P:GO:0000162; P:GO:0015976; F:GO:0033854; F:GO:0033853	F:pyridoxal phosphate binding; F:identical protein binding; P:L-phenylalanine biosynthetic process; F:L-phenylalanine:2-oxoglutarate aminotransferase activity; P:proline metabolic process; P:tyrosine biosynthetic process; P:aspartate metabolic process; F:L-aspartate:2-oxoglutarate aminotransferase activity; P:cysteine metabolic process; P:alanine metabolic process; P:alkaloid biosynthetic process…	EC:2.6.1.9; EC:2.6.1.78; EC:2.6.1.57; EC:2.6.1.79; EC:2.6.1.5; EC:2.6.1.1	Histidinol-phosphate transaminase; Aspartate--prephenate aminotransferase; Aromatic-amino-acid transaminase; Glutamate--prephenate aminotransferase; Tyrosine transaminase; Aspartate transaminase
Les.2183.2.S1_at	101257590	atpB	ATP synthase subunit beta, chloroplastic-like	XM_004228524	Solyc01g007320.2.1										0.0346244	0.258037	-3.87542				0.0234723	0.296657	-3.3709				0.000755514	0.156203	-6.40194	C:GO:0045261; F:GO:0005524; P:GO:0015991; P:GO:0015986; C:GO:0009535; F:GO:0046933	C:proton-transporting ATP synthase complex, catalytic core F(1); F:ATP binding; P:ATP hydrolysis coupled proton transport; P:ATP synthesis coupled proton transport; C:chloroplast thylakoid membrane; F:proton-transporting ATP synthase activity, rotational mechanism	EC:3.6.1.3; EC:3.6.1.15	Adenosinetriphosphatase; Nucleoside-triphosphate phosphatase
Les.2187.1.A1_at	101265391	LOC101265391	mannan endo-1,4-beta-mannosidase 7-like	XM_004232379	Solyc02g084990.2.1																0.00537017	0.474078	-2.10936							P:GO:0006080; P:GO:0046355; P:GO:0006013; P:GO:0006000; F:GO:0004553; F:GO:0016798; F:GO:0016787; F:GO:0016985	P:substituted mannan metabolic process; P:mannan catabolic process; P:mannose metabolic process; P:fructose metabolic process; F:hydrolase activity, hydrolyzing O-glycosyl compounds; F:hydrolase activity, acting on glycosyl bonds; F:hydrolase activity; F:mannan endo-1,4-beta-mannosidase activity	EC:3.2.1.25; EC:3.2.1.78	Beta-mannosidase; Mannan endo-1,4-beta-mannosidase
Les.2189.1.S1_at	778302	LOC778302	multicopper oxidase-like protein	XM_004238358	Solyc04g082140.2.1																			0.00214193	0.386511	-2.58725				F:GO:0016722; P:GO:0006118; C:GO:0009506; F:GO:0005507; C:GO:0016021; P:GO:0055114; P:GO:0019852; C:GO:0009505; F:GO:0008447	F:oxidoreductase activity, oxidizing metal ions; P:obsolete electron transport; C:plasmodesma; F:copper ion binding; C:integral component of membrane; P:oxidation-reduction process; P:L-ascorbic acid metabolic process; C:plant-type cell wall; F:L-ascorbate oxidase activity	EC:1.10.3; EC:1.10.3.3	Acting on diphenols and related substances as donors; L-ascorbate oxidase
Les.219.1.S1_at	543812	LOC543812	phosphoenolpyruvate carboxykinase	NM_001247150	Solyc04g076880.2.1										0.00614718	0.264662	-3.7784										0.0089973	0.278294	-3.59333	F:GO:0004612; F:GO:0005524; P:GO:0006094; C:GO:0005829; P:GO:0006099; P:GO:0016310; F:GO:0016301; P:GO:0015976	F:phosphoenolpyruvate carboxykinase (ATP) activity; F:ATP binding; P:gluconeogenesis; C:cytosol; P:tricarboxylic acid cycle; P:phosphorylation; F:kinase activity; P:carbon utilization	EC:4.1.1.49	Phosphoenolpyruvate carboxykinase (ATP)
Les.2198.2.A1_at	101249559	LOC101249559	histidine-containing phosphotransfer protein 1	XM_004242275	Solyc06g084410.2.1																0.0120877	2.24316	2.24316				0.00176613	2.71869	2.71869	F:GO:0009927; C:GO:0005634; C:GO:0005737; P:GO:0000160; P:GO:0016310; P:GO:0009736; F:GO:0043424; F:GO:0004871	F:histidine phosphotransfer kinase activity; C:nucleus; C:cytoplasm; P:phosphorelay signal transduction system; P:phosphorylation; P:cytokinin-activated signaling pathway; F:protein histidine kinase binding; F:signal transducer activity
Les.220.1.S1_at	101252712	LOC101252712	BAHD acyltransferase DCR-like	XM_004246289	Solyc09g014280.1.1				0.000910407	4.67366	4.67366										0.00720538	3.29407	3.29407	0.00903084	0.34023	-2.93918				F:GO:0016747; C:GO:0005737	F:transferase activity, transferring acyl groups other than amino-acyl groups; C:cytoplasm
Les.2206.1.S1_at	101260435	LOC101260435	acetyl-CoA acetyltransferase, cytosolic 1	XM_004239210	Solyc05g017760.2.1							0.0100091	0.409458	-2.44225							0.00414328	0.344865	-2.89968				0.00753401	0.393681	-2.54013	F:GO:0016747; P:GO:0008152	F:transferase activity, transferring acyl groups other than amino-acyl groups; P:metabolic process
Les.221.1.S1_at	543506	ACO4-like	1-aminocyclopropane-1-carboxylate oxidase	NM_001246938	Solyc02g081190.2.1							0.000235244	2.04762	2.04762																F:GO:0051213; F:GO:0046872; P:GO:0009693; P:GO:0055114	F:dioxygenase activity; F:metal ion binding; P:ethylene biosynthetic process; P:oxidation-reduction process
Les.2211.2.S1_at	101245545	LOC101245545	ranBP2-type zinc finger protein At1g67325-like	XM_004239167 /// XM_004239168	Solyc05g015500.2.1	0.0271866	0.413676	-2.41735													0.00255736	0.297168	-3.3651				0.00720872	0.365853	-2.73334	F:GO:0008270; C:GO:0016021	F:zinc ion binding; C:integral component of membrane
Les.2214.1.A1_at	101264317	LOC101264317	uncharacterized LOC101264317	XM_004237731	Solyc04g071180.2.1																0.00228945	3.36831	3.36831				0.0136662	2.45607	2.45607
Les.2217.1.A1_at	101263943	LOC101263943	coatomer subunit gamma-2-like	XM_004230813	Solyc01g109540.2.1																0.00759007	2.06627	2.06627				0.00236864	2.24184	2.24184	P:GO:0015031; F:GO:0005198; C:GO:0005794; C:GO:0000139; P:GO:0006886; P:GO:0006810; C:GO:0030117; P:GO:0016192; C:GO:0005737; C:GO:0016020; C:GO:0031410; C:GO:0030663; C:GO:0030126	P:protein transport; F:structural molecule activity; C:Golgi apparatus; C:Golgi membrane; P:intracellular protein transport; P:transport; C:membrane coat; P:vesicle-mediated transport; C:cytoplasm; C:membrane; C:cytoplasmic vesicle; C:COPI-coated vesicle membrane; C:COPI vesicle coat
Les.2218.1.A1_at	101249123	LOC101249123	probable carboxylesterase 7-like	XM_004230764	Solyc01g108540.2.1																0.00249687	4.51019	4.51019	0.000369453	5.66698	5.66698	0.00143685	4.62131	4.62131	P:GO:0008152; F:GO:0016787	P:metabolic process; F:hydrolase activity
Les.2225.1.S1_at	101253267	LOC101253267	uncharacterized LOC101253267	XM_004235503	Solyc03g122300.1.1							0.0013456	2.45986	2.45986							0.00619547	2.18132	2.18132	5.67544e-05	3.31255	3.31255	0.000588999	2.67394	2.67394
Les.2229.2.A1_at	101267668	LOC101267668	ACT domain-containing protein	XM_004249917	Solyc11g006970.1.1																0.000381754	3.08402	3.08402	0.00478442	2.20204	2.20204	0.00250772	2.3946	2.3946	C:GO:0009570; C:GO:0009507; C:GO:0009535	C:chloroplast stroma; C:chloroplast; C:chloroplast thylakoid membrane
Les.224.1.S1_at	543756	gts1	gts1 protein	XM_004236638	Solyc04g014510.2.1																			0.00665815	0.282196	-3.54363	0.00220656	0.225658	-4.43149	F:GO:0000166; F:GO:0005524; F:GO:0003824; P:GO:0009252; P:GO:0006542; F:GO:0016874; F:GO:0004356	F:nucleotide binding; F:ATP binding; F:catalytic activity; P:peptidoglycan biosynthetic process; P:glutamine biosynthetic process; F:ligase activity; F:glutamate-ammonia ligase activity	EC:6.3.1.2	Glutamate--ammonia ligase
Les.2246.1.A1_at	101261699	LOC101261699	uncharacterized LOC101261699	XM_004235448 /// XM_004235449	Solyc03g124060.2.1																			3.26815e-06	0.478128	-2.09149				C:GO:0016021; F:GO:0008289	C:integral component of membrane; F:lipid binding
Les.2248.1.A1_at	101243946	LOC101243946	stress-induced protein KIN2-like	XM_004232066	Solyc02g089590.2.1																						0.00721512	3.18096	3.18096
Les.2253.2.A1_at	101252029	LOC101252029	probable N-acetyl-gamma-glutamyl-phosphate reductase, chloroplastic-like	XM_004230774	Solyc01g108660.2.1																0.0024486	2.56493	2.56493							F:GO:0003942; P:GO:0006526; F:GO:0051287; C:GO:0005737; P:GO:0000051; P:GO:0008652; F:GO:0046983; P:GO:0055114; F:GO:0016620	F:N-acetyl-gamma-glutamyl-phosphate reductase activity; P:arginine biosynthetic process; F:NAD binding; C:cytoplasm; P:obsolete urea cycle intermediate metabolic process; P:cellular amino acid biosynthetic process; F:protein dimerization activity; P:oxidation-reduction process; F:oxidoreductase activity, acting on the aldehyde or oxo group of donors, NAD or NADP as acceptor	EC:1.2.1.38	N-acetyl-gamma-glutamyl-phosphate reductase
Les.2264.1.S1_at	101262219	LOC101262219	peptide-N4-(N-acetyl-beta-glucosaminyl)asparagine amidase A-like	XM_004241064	Solyc06g051010.1.1	0.00125086	2.37097	2.37097													1.02102e-05	3.55526	3.55526				0.00227498	2.08141	2.08141	P:GO:0006807; F:GO:0000224	P:nitrogen compound metabolic process; F:peptide-N4-(N-acetyl-beta-glucosaminyl)asparagine amidase activity	EC:3.5.1.52	Peptide-N(4)-(N-acetyl-beta-glucosaminyl)asparagine amidase
Les.2265.1.S1_at	101250561	LOC101250561	acyl-[acyl-carrier-protein] desaturase, chloroplastic-like	XM_004250029	Solyc11g008680.1.1																			0.0363663	0.456757	-2.18935				C:GO:0009507; F:GO:0046872; F:GO:0045300; P:GO:0055114; P:GO:0006633	C:chloroplast; F:metal ion binding; F:acyl-[acyl-carrier-protein] desaturase activity; P:oxidation-reduction process; P:fatty acid biosynthetic process	EC:1.14.19.2; EC:1.14.19	Stearoyl-[acyl-carrier-protein] 9-desaturase; Acting on paired donors, with incorporation or reduction of molecular oxygen. The oxygen incorporated need not be derived from O(2)
Les.2267.1.S1_at	101257021	LOC101257021	WD repeat-containing protein 3-like	XM_004248480	Solyc10g039190.1.1	0.000118047	3.16734	3.16734										0.000657406	2.40079	2.40079										C:GO:0032040; P:GO:0000462; F:GO:0030515; C:GO:0034388	C:small-subunit processome; P:maturation of SSU-rRNA from tricistronic rRNA transcript (SSU-rRNA, 5.8S rRNA, LSU-rRNA); F:snoRNA binding; C:Pwp2p-containing subcomplex of 90S preribosome
Les.2270.1.S1_at	101245505	LOC101245505	uncharacterized LOC101245505	XM_004230668	Solyc01g107330.2.1																0.00582566	0.150301	-6.65331	0.00837729	0.186096	-5.37357	0.000111334	0.0625173	-15.9956
Les.2271.1.S1_at	101248227	LOC101248227	uncharacterized LOC101248227	XM_004245777	Solyc08g077880.2.1																						0.0001762	0.401186	-2.49261	C:GO:0016021	C:integral component of membrane
Les.2277.1.A1_at	101261598	LOC101261598	uncharacterized LOC101261598	XM_004235532	Solyc03g121850.2.1																						0.0490995	2.71578	2.71578
Les.2278.1.S1_at	100736482	F3H	flavanone 3 beta-hydroxylase	XM_004232440	Solyc02g083860.2.1							0.0299295	0.369351	-2.70745										0.0272697	0.368946	-2.71043				F:GO:0045486; F:GO:0046872; P:GO:0055114; P:GO:0009813; P:GO:0010224	F:naringenin 3-dioxygenase activity; F:metal ion binding; P:oxidation-reduction process; P:flavonoid biosynthetic process; P:response to UV-B	EC:1.14.11; EC:1.14.11.9	Acting on paired donors, with incorporation or reduction of molecular oxygen. The oxygen incorporated need not be derived from O(2); Flavanone 3-dioxygenase
Les.228.1.S1_at	101261588	LOC101261588	proline-rich protein	NM_001320094	Solyc12g009650.1.1																			0.00174444	0.14177	-7.05368	0.000207005	0.0839873	-11.9066	P:GO:0009651; P:GO:0009682; C:GO:0005783; F:GO:0008289; P:GO:0009631; C:GO:0009505; P:GO:0009626; F:GO:0043621; P:GO:0009733; C:GO:0009707; P:GO:0006869; C:GO:0009506; P:GO:0009627; P:GO:0009737; C:GO:0048046; P:GO:0050832; P:GO:0070417; P:GO:0010102	P:response to salt stress; P:induced systemic resistance; C:endoplasmic reticulum; F:lipid binding; P:cold acclimation; C:plant-type cell wall; P:plant-type hypersensitive response; F:protein self-association; P:response to auxin; C:chloroplast outer membrane; P:lipid transport; C:plasmodesma; P:systemic acquired resistance; P:response to abscisic acid; C:apoplast; P:defense response to fungus; P…
Les.2281.1.S1_at	101266947	LOC101266947	lysosomal beta glucosidase-like	XM_004241324 /// XM_004241325	Solyc06g073740.2.1																						0.000415207	2.20966	2.20966	P:GO:0009251; F:GO:0008422	P:glucan catabolic process; F:beta-glucosidase activity	EC:3.2.1.21	Beta-glucosidase
Les.2286.1.S1_at	101257186	LOC101257186	chlorophyll a-b binding protein 7, chloroplastic-like	XM_004242903 /// XM_004242904	Solyc07g022900.2.1																0.00722153	0.483829	-2.06685	0.000301276	0.374286	-2.67175	3.32697e-07	0.186755	-5.35462	C:GO:0009782; F:GO:0046872; F:GO:0031409; C:GO:0009941; C:GO:0016021; P:GO:0018298; F:GO:0016168; C:GO:0010287; P:GO:0009416; P:GO:0009768; C:GO:0009535	C:photosystem I antenna complex; F:metal ion binding; F:pigment binding; C:chloroplast envelope; C:integral component of membrane; P:protein-chromophore linkage; F:chlorophyll binding; C:plastoglobule; P:response to light stimulus; P:photosynthesis, light harvesting in photosystem I; C:chloroplast thylakoid membrane
Les.2294.2.A1_a_at	101250858	LOC101250858	BOI-related E3 ubiquitin-protein ligase 1	XM_004233169	Solyc02g069180.2.1																0.00590633	2.22091	2.22091				0.00153167	2.57728	2.57728
Les.2296.1.A1_at	101254481	LOC101254481	uncharacterized LOC101254481	XM_004238193	Solyc04g080130.2.1							0.0159793	2.08748	2.08748													0.000555883	3.11816	3.11816	F:GO:0003676; F:GO:0046872	F:nucleic acid binding; F:metal ion binding
Les.2297.1.S1_at	101264013	LOC101264013	uncharacterized LOC101264013	XM_004240514	Solyc06g009380.2.1																0.00222306	2.21494	2.21494							C:GO:0016021	C:integral component of membrane
Les.2299.1.A1_at	101247804	LOC101247804	cytochrome P450 71A2-like	XM_004236232	Solyc03g112010.2.1																			0.00674963	2.22853	2.22853				F:GO:0005506; C:GO:0016020; P:GO:0044550; F:GO:0016709; P:GO:0055114; F:GO:0020037	F:iron ion binding; C:membrane; P:secondary metabolite biosynthetic process; F:oxidoreductase activity, acting on paired donors, with incorporation or reduction of molecular oxygen, NAD(P)H as one donor, and incorporation of one atom of oxygen; P:oxidation-reduction process; F:heme binding	EC:1.14.13	Acting on paired donors, with incorporation or reduction of molecular oxygen. The oxygen incorporated need not be derived from O(2)
Les.23.1.S1_at	543526	JA2	jasmonic acid 2	NM_001247043	Solyc12g013620.1.1				0.00116656	9.84306	9.84306										0.000105076	18.0337	18.0337				0.00707754	5.66173	5.66173	C:GO:0005634; F:GO:0003677; P:GO:0006351; P:GO:0006355; P:GO:0055114; F:GO:0000721	C:nucleus; F:DNA binding; P:transcription, DNA-templated; P:regulation of transcription, DNA-templated; P:oxidation-reduction process; F:(R,R)-butanediol dehydrogenase activity	EC:1.1.1.4	(R,R)-butanediol dehydrogenase
Les.2305.1.S1_at	101253938	LOC101253938	histidine-containing phosphotransfer protein 1-like	XM_004230107	Solyc01g098400.2.1																			0.00440631	4.18658	4.18658				F:GO:0009927; C:GO:0005634; C:GO:0005737; P:GO:0000160; P:GO:0016310; P:GO:0009736; F:GO:0043424; F:GO:0004871	F:histidine phosphotransfer kinase activity; C:nucleus; C:cytoplasm; P:phosphorelay signal transduction system; P:phosphorylation; P:cytokinin-activated signaling pathway; F:protein histidine kinase binding; F:signal transducer activity
Les.2307.1.A1_at	100736507	LOC100736507	succinate dehydrogenase	NM_001247931	Solyc02g093680.2.1																0.0303216	2.14096	2.14096							F:GO:0008270; P:GO:0006118; C:GO:0005749; F:GO:0008177; F:GO:0009055; F:GO:0051538; P:GO:0006099; P:GO:0006121; F:GO:0051539; F:GO:0051537	F:zinc ion binding; P:obsolete electron transport; C:mitochondrial respiratory chain complex II, succinate dehydrogenase complex (ubiquinone); F:succinate dehydrogenase (ubiquinone) activity; F:electron carrier activity; F:3 iron, 4 sulfur cluster binding; P:tricarboxylic acid cycle; P:mitochondrial electron transport, succinate to ubiquinone; F:4 iron, 4 sulfur cluster binding; F:2 iron, 2 sulfu…	EC:1.3.99.1; EC:1.3.5.1	Deleted entry; Succinate dehydrogenase (quinone)
Les.2308.2.S1_at	101246828	LOC101246828	40S ribosomal protein S4-like	XM_004240373	Solyc06g007360.2.1																0.0241173	0.309131	-3.23487				0.0248382	0.329131	-3.03831	F:GO:0003735; C:GO:0022627; P:GO:0042254; F:GO:0019843; P:GO:0006412	F:structural constituent of ribosome; C:cytosolic small ribosomal subunit; P:ribosome biogenesis; F:rRNA binding; P:translation
Les.2313.1.A1_at	778363	ARF3	auxin response factor 3	NM_001247387	Solyc02g077560.2.1				0.0277663	0.0697932	-14.328	0.0481934	0.10541	-9.4868																C:GO:0005634; F:GO:0003677; P:GO:0006351; P:GO:0006355; P:GO:0009725; P:GO:0009734	C:nucleus; F:DNA binding; P:transcription, DNA-templated; P:regulation of transcription, DNA-templated; P:response to hormone; P:auxin-activated signaling pathway
Les.2316.1.S1_at	101255510	LOC101255510	cellulose synthase-like protein G1-like	XM_004243592	Solyc07g043390.2.1							0.000688004	0.346788	-2.88361							0.032121	0.244027	-4.09791				0.00547338	0.164031	-6.09643	C:GO:0016021; F:GO:0016760; P:GO:0030244; P:GO:0006011; P:GO:0071555; P:GO:0005982; P:GO:0005985	C:integral component of membrane; F:cellulose synthase (UDP-forming) activity; P:cellulose biosynthetic process; P:UDP-glucose metabolic process; P:cell wall organization; P:starch metabolic process; P:sucrose metabolic process	EC:2.4.1.12	Cellulose synthase (UDP-forming)
Les.2322.1.A1_at	101261693	LOC101261693	ethylene-responsive transcription factor RAP2-12-like	XM_004252354	Solyc12g049560.1.1	0.0012828	0.407009	-2.45695																						C:GO:0005634; F:GO:0003677; C:GO:0005667; F:GO:0003700; P:GO:0006355; P:GO:0006355	C:nucleus; F:DNA binding; C:transcription factor complex; F:transcription factor activity, sequence-specific DNA binding; P:regulation of transcription, DNA-templated; P:regulation of transcription, DNA-templated
Les.2323.1.S1_at	101265599	LOC101265599	pyruvate kinase, cytosolic isozyme-like	XM_004249417	Solyc10g083720.1.1																4.20133e-05	2.93359	2.93359				0.000745142	2.19704	2.19704	F:GO:0000287; F:GO:0004743; P:GO:0006094; F:GO:0030955; P:GO:0006096; P:GO:0006144; F:GO:0016301; P:GO:0015976	F:magnesium ion binding; F:pyruvate kinase activity; P:gluconeogenesis; F:potassium ion binding; P:glycolytic process; P:purine nucleobase metabolic process; F:kinase activity; P:carbon utilization	EC:2.7.1.40	Pyruvate kinase
Les.2325.1.S1_at	543760	yfe37	yfe37 protein	NM_001246927	Solyc01g073640.2.1	0.0180846	3.9198	3.9198										0.0388297	2.86067	2.86067				0.0104357	3.81674	3.81674	0.00687694	0.234182	-4.27019	P:GO:0009750; P:GO:0010182; P:GO:0009688; P:GO:0006561; C:GO:0005576; P:GO:0009626; P:GO:0042742; P:GO:0009414; F:GO:0000166; P:GO:0046251; P:GO:0009408; P:GO:0031525; F:GO:0005507; C:GO:0005829; P:GO:0010115; P:GO:0055114; P:GO:0051504; F:GO:0010301; F:GO:0018459; F:GO:0018458	P:response to fructose; P:sugar mediated signaling pathway; P:abscisic acid biosynthetic process; P:proline biosynthetic process; C:extracellular region; P:plant-type hypersensitive response; P:defense response to bacterium; P:response to water deprivation; F:nucleotide binding; P:limonene catabolic process; P:response to heat; P:menthol biosynthetic process; F:copper ion binding; C:cytosol; P:re…	EC:1.1.1.223; EC:1.1.1.288; EC:1.1.1.243; EC:1.1.1.1	Isopiperitenol dehydrogenase; Xanthoxin dehydrogenase; Carveol dehydrogenase; Alcohol dehydrogenase
Les.233.1.S1_at	543975	CAB4	chlorophyll a/b-binding protein precursor	NM_001247810	Solyc07g047850.2.1							0.00820827	0.379942	-2.63198							0.0114377	0.38075	-2.62639				0.000107137	0.208412	-4.79819	F:GO:0046872; F:GO:0031409; C:GO:0009523; C:GO:0009941; C:GO:0016021; C:GO:0009522; P:GO:0018298; F:GO:0016168; C:GO:0010287; P:GO:0009416; P:GO:0009768; C:GO:0009535	F:metal ion binding; F:pigment binding; C:photosystem II; C:chloroplast envelope; C:integral component of membrane; C:photosystem I; P:protein-chromophore linkage; F:chlorophyll binding; C:plastoglobule; P:response to light stimulus; P:photosynthesis, light harvesting in photosystem I; C:chloroplast thylakoid membrane
Les.2332.1.A1_at	101250249	LOC101250249	putative F-box protein At3g16210	XM_004246708	Solyc09g005480.2.1	0.000696859	10.7008	10.7008	0.0221491	4.11935	4.11935	0.0075491	5.00544	5.00544	0.0222148	3.75665	3.75665	0.00379195	5.70401	5.70401	0.00259372	7.0525	7.0525				0.00344419	6.01499	6.01499	F:GO:0004842; P:GO:0031146; C:GO:0019005; P:GO:0016567	F:ubiquitin-protein transferase activity; P:SCF-dependent proteasomal ubiquitin-dependent protein catabolic process; C:SCF ubiquitin ligase complex; P:protein ubiquitination
Les.2333.1.S1_at	101260417	LOC101260417	uncharacterized LOC101260417	XM_004236107	Solyc03g113730.2.1																0.000668569	0.431775	-2.31602							C:GO:0016021	C:integral component of membrane
Les.2335.1.A1_at	101253775	LOC101253775	target of Myb protein 1	XM_004237656	Solyc04g063280.2.1																						0.0020783	2.54157	2.54157	P:GO:0006886; C:GO:0005622	P:intracellular protein transport; C:intracellular
Les.2340.1.A1_at	101248532	LOC101248532	uncharacterized LOC101248532	XM_004231999	Solyc02g090530.2.1																						0.0044037	2.47503	2.47503
Les.2341.1.A1_at	101246400	LOC101246400	uncharacterized LOC101246400	XM_004233408	Solyc02g064690.2.1																			0.00372668	0.2389	-4.18585				P:GO:0042967; F:GO:0016747; P:GO:0006473; F:GO:0008080	P:acyl-carrier-protein biosynthetic process; F:transferase activity, transferring acyl groups other than amino-acyl groups; P:protein acetylation; F:N-acetyltransferase activity
Les.2348.1.S1_at	101250988	LOC101250988	uncharacterized LOC101250988	XM_004238699	Solyc05g006780.2.1							0.000764739	2.23046	2.23046
Les.2350.1.S1_at	101248636	LOC101248636	ganglioside-induced differentiation-associated protein 2	XM_004232488	Solyc02g083250.2.1				0.0389768	0.44321	-2.25627				0.0442052	0.450905	-2.21776				0.0253666	0.264135	-3.78594	0.0215734	0.276873	-3.61176	0.0282716	0.289211	-3.45768	C:GO:0005737	C:cytoplasm
Les.2351.1.S1_at	101246627	LOC101246627	50S ribosomal protein 6, chloroplastic-like	XM_004238002	Solyc04g077130.1.1																			0.00340485	0.363661	-2.74981	1.41314e-05	0.175479	-5.69869	C:GO:0009507; F:GO:0003735; P:GO:0042254; C:GO:0005840; F:GO:0019843; P:GO:0006412	C:chloroplast; F:structural constituent of ribosome; P:ribosome biogenesis; C:ribosome; F:rRNA binding; P:translation
Les.2355.2.A1_at	101245330	LOC101245330	protein phosphatase inhibitor 2	XM_004234327 /// XM_004234328 /// XM_004234329	Solyc03g025980.2.1																						0.01229	2.07052	2.07052	F:GO:0004864; C:GO:0000164; P:GO:0043086; P:GO:0043666; P:GO:0009966	F:protein phosphatase inhibitor activity; C:protein phosphatase type 1 complex; P:negative regulation of catalytic activity; P:regulation of phosphoprotein phosphatase activity; P:regulation of signal transduction
Les.2358.1.A1_at	101263304	LOC101263304	zeatin O-glucosyltransferase	XM_010320870	---							0.0334419	0.460441	-2.17183
Les.2360.1.S1_at	778326	nii2	nitrite reductase	XM_004248688	Solyc10g050890.1.1													0.0116739	0.425676	-2.3492	0.000380919	4.01626	4.01626	0.00174645	3.0219	3.0219	6.05962e-05	4.76755	4.76755	F:GO:0046872; P:GO:0055114; F:GO:0051539; F:GO:0020037; F:GO:0048307	F:metal ion binding; P:oxidation-reduction process; F:4 iron, 4 sulfur cluster binding; F:heme binding; F:ferredoxin-nitrite reductase activity	EC:1.7.7.1	Ferredoxin--nitrite reductase
Les.2364.1.S1_at	101258291	LOC101258291	mitochondrial import inner membrane translocase subunit TIM13-like	XM_004245390	Solyc08g083380.2.1	0.00760296	2.03084	2.03084													0.00216326	2.2266	2.2266							C:GO:0005758; F:GO:0005507; P:GO:0015031	C:mitochondrial intermembrane space; F:copper ion binding; P:protein transport
Les.2367.1.A1_at	101266109	LOC101266109	AMSH-like ubiquitin thioesterase 1-like	XM_004235710	Solyc03g119330.2.1																						0.00617547	2.10868	2.10868
Les.2377.1.S1_at	101259747	LOC101259747	uncharacterized LOC101259747	XM_004239265	Solyc05g025600.1.1																0.0102953	0.480717	-2.08023				7.86092e-07	0.184606	-5.41694	C:GO:0009523; C:GO:0016021; P:GO:0015979	C:photosystem II; C:integral component of membrane; P:photosynthesis
Les.2380.1.A1_at	101256923	LOC101256923	putative amidase C869.01-like	XM_004230960	Solyc01g110700.2.1										0.00971801	3.00185	3.00185
Les.239.1.S1_at	101249084	LOC101249084	ATP synthase delta chain, chloroplastic-like	XM_004240029	Solyc05g050500.1.1																0.00846514	0.323375	-3.09239	0.00149929	0.266139	-3.75744	0.00279742	0.286362	-3.49208	C:GO:0045259; P:GO:0015986; F:GO:0046933	C:proton-transporting ATP synthase complex; P:ATP synthesis coupled proton transport; F:proton-transporting ATP synthase activity, rotational mechanism	EC:3.6.1.3; EC:3.6.1.15	Adenosinetriphosphatase; Nucleoside-triphosphate phosphatase
Les.24.1.S1_at	778277	AGAL	alpha-galactosidase	NM_001247042	Solyc03g019790.2.1																0.00629929	0.37847	-2.64222							P:GO:0005975; F:GO:0052692; C:GO:0048046; P:GO:0009620; C:GO:0009505; P:GO:0009911; P:GO:0009965	P:carbohydrate metabolic process; F:raffinose alpha-galactosidase activity; C:apoplast; P:response to fungus; C:plant-type cell wall; P:positive regulation of flower development; P:leaf morphogenesis	EC:3.2.1.22	Alpha-galactosidase
Les.2403.1.S1_at	101261181	LOC101261181	UDP-glycosyltransferase 73C4-like	XM_004249570 /// XM_004249571	Solyc10g085870.1.1																0.00370102	4.04367	4.04367	0.000431118	5.2886	5.2886	4.28701e-08	28.2412	28.2412	P:GO:0052696; F:GO:0080043; C:GO:0043231; F:GO:0080044; P:GO:0009813	P:flavonoid glucuronidation; F:quercetin 3-O-glucosyltransferase activity; C:intracellular membrane-bounded organelle; F:quercetin 7-O-glucosyltransferase activity; P:flavonoid biosynthetic process
Les.241.3.S1_at	101255358	LOC101255358	30S ribosomal protein S5, chloroplastic-like	XM_004232848	Solyc02g077990.2.1																0.0133782	0.169305	-5.90651	9.35822e-05	0.467099	-2.14087	2.23544e-07	0.301558	-3.31611	C:GO:0009570; C:GO:0005634; F:GO:0003723; F:GO:0003735; C:GO:0022627; P:GO:0042254; C:GO:0005763; C:GO:0009535; P:GO:0006412	C:chloroplast stroma; C:nucleus; F:RNA binding; F:structural constituent of ribosome; C:cytosolic small ribosomal subunit; P:ribosome biogenesis; C:mitochondrial small ribosomal subunit; C:chloroplast thylakoid membrane; P:translation
Les.2412.2.A1_at	101254736	LOC101254736	DNA-directed RNA polymerases I, II, and III subunit RPABC4-like	XM_004248173	Solyc10g007650.2.1																						0.00697737	2.05038	2.05038	P:GO:0006383; P:GO:0006351; P:GO:0006360; P:GO:0006366; P:GO:0006144; C:GO:0005666; C:GO:0005665; F:GO:0003677; F:GO:0001056; C:GO:0005736; F:GO:0001055; P:GO:0006206; F:GO:0001054; F:GO:0003899	P:transcription from RNA polymerase III promoter; P:transcription, DNA-templated; P:transcription from RNA polymerase I promoter; P:transcription from RNA polymerase II promoter; P:purine nucleobase metabolic process; C:DNA-directed RNA polymerase III complex; C:DNA-directed RNA polymerase II, core complex; F:DNA binding; F:RNA polymerase III activity; C:DNA-directed RNA polymerase I complex; F:R…	EC:2.7.7.6	DNA-directed RNA polymerase
Les.2414.2.S1_at	101261005	LOC101261005	solute carrier family 25 member 44-like	XM_004235530	Solyc03g121920.2.1										0.0179816	0.37468	-2.66894				0.0346757	0.396873	-2.5197							P:GO:0055085; C:GO:0016021	P:transmembrane transport; C:integral component of membrane
Les.2415.1.S1_at	101265653	LOC101265653	omega-6 fatty acid desaturase, chloroplastic-like	XM_004242537	Solyc07g005510.2.1										0.00151331	0.229826	-4.35112				0.00332191	0.239471	-4.17587				0.000607125	0.191661	-5.21754	P:GO:0006629; C:GO:0009941; C:GO:0016021; P:GO:0010205	P:lipid metabolic process; C:chloroplast envelope; C:integral component of membrane; P:photoinhibition
Les.2416.1.S1_at	101266060	SAP3	A20/AN1 zinc finger protein	NM_001320158///NM_001320159	Solyc01g014180.2.1																0.00274228	0.230085	-4.34622							F:GO:0003677; F:GO:0008270	F:DNA binding; F:zinc ion binding
Les.2417.1.S1_at	101259757	LOC101259757	uncharacterized LOC101259757	XM_004241128	Solyc06g076790.1.1																			9.55551e-05	0.22864	-4.37368	9.62552e-07	0.120185	-8.32053	C:GO:0009941; C:GO:0009535	C:chloroplast envelope; C:chloroplast thylakoid membrane
Les.2421.1.A1_at	101254160	LOC101254160	WPP domain-interacting tail-anchored protein 1-like	XM_004233351	Solyc02g065660.2.1																0.037464	2.36569	2.36569				0.02664	2.40962	2.40962	C:GO:0005635; C:GO:0016020; C:GO:0016021	C:nuclear envelope; C:membrane; C:integral component of membrane
Les.2422.2.A1_at	101260294	LOC101260294	uncharacterized LOC101260294	XM_004232602	Solyc02g081590.2.1																0.00120749	3.49612	3.49612	0.0317814	2.06011	2.06011	0.00113069	3.32093	3.32093	P:GO:0032968; C:GO:0035101; F:GO:0042393; F:GO:0031491; P:GO:0034724; C:GO:0000785; P:GO:0006368	P:positive regulation of transcription elongation from RNA polymerase II promoter; C:FACT complex; F:histone binding; F:nucleosome binding; P:DNA replication-independent nucleosome organization; C:chromatin; P:transcription elongation from RNA polymerase II promoter
Les.2423.1.A1_at	101257650	LOC101257650	uncharacterized LOC101257650	XM_004236607	Solyc04g015030.2.1																0.0229312	0.30065	-3.32613							P:GO:0046916; F:GO:0046914; F:GO:0046872; C:GO:0005737; P:GO:0030001	P:cellular transition metal ion homeostasis; F:transition metal ion binding; F:metal ion binding; C:cytoplasm; P:metal ion transport
Les.2427.3.S1_at	101250426	LOC101250426	polyadenylate-binding protein RBP45-like	XM_004244079	Solyc07g064510.2.1																0.000671705	0.310427	-3.22137				0.00151323	0.360832	-2.77137	F:GO:0000166; C:GO:0005634; F:GO:0008143; P:GO:0006397	F:nucleotide binding; C:nucleus; F:poly(A) binding; P:mRNA processing
Les.2429.1.A1_at	101261015	LOC101261015	mediator of RNA polymerase II transcription subunit 13-like	XM_004237298	---																						0.00444304	2.07963	2.07963
Les.2437.1.S1_at	101257241	LOC101257241	uncharacterized LOC101257241	XM_004251668	Solyc12g009440.1.1																0.00325877	0.359541	-2.78132	0.00538439	0.408597	-2.4474	0.000375677	0.290125	-3.44679	F:GO:0031072; C:GO:0009507; F:GO:0051082	F:heat shock protein binding; C:chloroplast; F:unfolded protein binding
Les.2451.1.A1_at	101257275	LOC101257275	omega-amidase NIT2-like	XM_004242199	Solyc06g064880.2.1				0.0267487	0.417347	-2.39609																			F:GO:0016810; P:GO:0006807	F:hydrolase activity, acting on carbon-nitrogen (but not peptide) bonds; P:nitrogen compound metabolic process
Les.2459.1.S1_at	101254442	LOC101254442	shaggy-related protein kinase epsilon	XM_004232260	Solyc02g086670.2.1	0.0080825	0.322573	-3.10007										0.0272748	0.439603	-2.27478				0.0196026	2.3987	2.3987				F:GO:0000166; F:GO:0005524; F:GO:0004672; P:GO:0009069; P:GO:0006468; F:GO:0004674	F:nucleotide binding; F:ATP binding; F:protein kinase activity; P:serine family amino acid metabolic process; P:protein phosphorylation; F:protein serine/threonine kinase activity	EC:2.7.11	Transferring phosphorus-containing groups
Les.246.1.S1_at	101266063	SlFBA7	fructose-1,6-bisphosphate aldolase	NM_001321372	Solyc09g009260.2.1																5.03886e-06	2.53186	2.53186				2.76962e-06	2.51551	2.51551	P:GO:0006094; P:GO:0006020; P:GO:0006098; P:GO:0006096; P:GO:0006013; P:GO:0006000; F:GO:0004332; P:GO:0015976	P:gluconeogenesis; P:inositol metabolic process; P:pentose-phosphate shunt; P:glycolytic process; P:mannose metabolic process; P:fructose metabolic process; F:fructose-bisphosphate aldolase activity; P:carbon utilization	EC:4.1.2.13	Fructose-bisphosphate aldolase
Les.2460.2.S1_at	101245207	LOC101245207	organ-specific protein S2-like	XM_004248056	Solyc10g009150.2.1				0.0195922	9.88525	9.88525
Les.2461.1.S1_at	---	---	Unknown Protein	---	Solyc01g108700.2.1													0.0184197	0.47576	-2.1019
Les.2467.1.S1_at	104645713	LOC104645713	uncharacterized LOC104645713	XM_010317949	Solyc02g088120.2.1				0.0469047	2.27206	2.27206	0.00628291	3.06797	3.06797	0.0173817	2.55465	2.55465				1.34026e-07	19.4216	19.4216	2.12913e-05	7.10191	7.10191	1.18224e-06	11.6526	11.6526	C:GO:0016021	C:integral component of membrane
Les.247.1.S1_a_at	778224	APX2	cytosolic ascorbate peroxidase 2	NM_001247859	Solyc06g005150.2.1																9.45785e-06	2.02662	2.02662	0.00011999	2.22516	2.22516				P:GO:0006979; P:GO:0006804; P:GO:0098869; P:GO:0055114; P:GO:0019852; F:GO:0016688; F:GO:0020037	P:response to oxidative stress; P:obsolete peroxidase reaction; P:cellular oxidant detoxification; P:oxidation-reduction process; P:L-ascorbic acid metabolic process; F:L-ascorbate peroxidase activity; F:heme binding	EC:1.11.1.7; EC:1.11.1.11	Peroxidase; L-ascorbate peroxidase
Les.247.3.S1_at	778223	APX1	cytosolic ascorbate peroxidase 1	NM_001247853	Solyc06g005160.2.1																0.00136833	2.50312	2.50312	0.00160508	2.32282	2.32282				P:GO:0006979; P:GO:0006804; P:GO:0098869; P:GO:0055114; P:GO:0019852; F:GO:0016688; F:GO:0020037	P:response to oxidative stress; P:obsolete peroxidase reaction; P:cellular oxidant detoxification; P:oxidation-reduction process; P:L-ascorbic acid metabolic process; F:L-ascorbate peroxidase activity; F:heme binding	EC:1.11.1.7; EC:1.11.1.11	Peroxidase; L-ascorbate peroxidase
Les.2474.1.S1_at	101244831	LOC101244831	delta(24)-sterol reductase-like	XM_004233149	Solyc02g069490.2.1																			0.00230043	9.38064	9.38064	0.00626934	0.135676	-7.37048	F:GO:0016614; F:GO:0050660; C:GO:0016021; P:GO:0008202; P:GO:0055114	F:oxidoreductase activity, acting on CH-OH group of donors; F:flavin adenine dinucleotide binding; C:integral component of membrane; P:steroid metabolic process; P:oxidation-reduction process
Les.2476.1.A1_at	544070	LOC544070	wound induced protein	XM_004243260	Solyc07g054780.1.1										0.0114631	0.277432	-3.60448
Les.2478.1.S1_at	101267774	LOC101267774	chlorophyll a-b binding protein 3C, chloroplastic-like	XM_004234010 /// XM_004234011 /// XM_004234012 /// XM_004234013 /// XM_004234014 /// XM	Solyc03g005760.1.1																						0.000247018	0.441128	-2.26691	F:GO:0046872; F:GO:0031409; C:GO:0009523; C:GO:0009941; C:GO:0016021; C:GO:0009522; P:GO:0018298; F:GO:0016168; C:GO:0010287; P:GO:0009416; P:GO:0009768; C:GO:0009535	F:metal ion binding; F:pigment binding; C:photosystem II; C:chloroplast envelope; C:integral component of membrane; C:photosystem I; P:protein-chromophore linkage; F:chlorophyll binding; C:plastoglobule; P:response to light stimulus; P:photosynthesis, light harvesting in photosystem I; C:chloroplast thylakoid membrane
Les.2479.2.S1_at	101249435	LOC101249435	thioredoxin M4, chloroplastic-like	XM_004251808	Solyc12g013810.1.1																0.00062131	0.218657	-4.57337	0.0130811	0.381824	-2.61901	3.09486e-05	0.150387	-6.64952	C:GO:0009507; P:GO:0006118; F:GO:0015035; P:GO:0006662; F:GO:0016671; P:GO:0034599; P:GO:0045454; P:GO:0055114; P:GO:0006457; P:GO:0000103	C:chloroplast; P:obsolete electron transport; F:protein disulfide oxidoreductase activity; P:glycerol ether metabolic process; F:oxidoreductase activity, acting on a sulfur group of donors, disulfide as acceptor; P:cellular response to oxidative stress; P:cell redox homeostasis; P:oxidation-reduction process; P:protein folding; P:sulfate assimilation
Les.248.1.S1_a_at	543758	pi1	wound-induced protein WIN2	XM_004230043	Solyc01g097270.2.1	0.00356809	0.313535	-3.18943				0.0309913	2.10839	2.10839							0.000401075	4.12353	4.12353				0.00896431	2.52886	2.52886	F:GO:0008061; P:GO:0050832; P:GO:0042742	F:chitin binding; P:defense response to fungus; P:defense response to bacterium
Les.2482.1.A1_at	101254254	LOC101254254	prolyl 4-hydroxylase subunit alpha-1-like	XM_004231851	Solyc02g092710.2.1																						0.00857106	2.51031	2.51031	F:GO:0031418; F:GO:0016705; F:GO:0016491; F:GO:0005506; C:GO:0016020; C:GO:0016021; P:GO:0055114	F:L-ascorbic acid binding; F:oxidoreductase activity, acting on paired donors, with incorporation or reduction of molecular oxygen; F:oxidoreductase activity; F:iron ion binding; C:membrane; C:integral component of membrane; P:oxidation-reduction process
Les.2483.1.A1_at	101258207	LOC101258207	uncharacterized LOC101258207	XM_004231567	Solyc02g032930.2.1																0.000276403	2.28677	2.28677				9.8856e-05	2.37313	2.37313	C:GO:0005789; P:GO:0006888; C:GO:0016020; P:GO:0070973; C:GO:0016021; C:GO:0005783; P:GO:0006886	C:endoplasmic reticulum membrane; P:ER to Golgi vesicle-mediated transport; C:membrane; P:protein localization to endoplasmic reticulum exit site; C:integral component of membrane; C:endoplasmic reticulum; P:intracellular protein transport
Les.2489.1.S1_at	544197	GPXle-1	glutathione peroxidase	NM_001247638	Solyc08g080940.2.1																						4.30921e-05	2.17218	2.17218	F:GO:0047066; P:GO:0006979; F:GO:0004602; C:GO:0005737; P:GO:0006749; P:GO:0006804; P:GO:0098869; P:GO:0055114	F:phospholipid-hydroperoxide glutathione peroxidase activity; P:response to oxidative stress; F:glutathione peroxidase activity; C:cytoplasm; P:glutathione metabolic process; P:obsolete peroxidase reaction; P:cellular oxidant detoxification; P:oxidation-reduction process	EC:1.11.1.9; EC:1.11.1.12; EC:1.11.1.7	Glutathione peroxidase; Phospholipid-hydroperoxide glutathione peroxidase; Peroxidase
Les.2494.1.S1_at	101261386	LOC101261386	NADH-ubiquinone reductase complex 1 MLRQ subunit-like protein	XM_004233292	Solyc02g067580.2.1																0.00177168	0.464713	-2.15187							C:GO:0016021	C:integral component of membrane
Les.2495.1.S1_at	101262107	LOC101262107	serine/threonine-protein kinase SAPK2	XM_004237888	Solyc04g074500.2.1																0.00668625	2.37274	2.37274	0.0138444	2.05856	2.05856	0.00239493	2.56575	2.56575	F:GO:0005524; P:GO:0009069; F:GO:0004674; P:GO:0006468	F:ATP binding; P:serine family amino acid metabolic process; F:protein serine/threonine kinase activity; P:protein phosphorylation	EC:2.7.11	Transferring phosphorus-containing groups
Les.25.1.S1_at	544217	LOC544217	mRNA binding protein precursor	NM_001247727	Solyc09g065180.2.1																			3.7177e-05	0.308091	-3.2458	6.73764e-06	0.255313	-3.91676	F:GO:0050662; F:GO:0003824	F:coenzyme binding; F:catalytic activity
Les.2501.1.S1_at	101257721	LOC101257721	uncharacterized LOC101257721	XM_004249886	Solyc11g006410.1.1							0.00194975	2.031	2.031	0.00125282	2.08037	2.08037				0.000159053	2.61791	2.61791	0.000806829	2.15646	2.15646	1.65856e-06	3.68216	3.68216
Les.2502.3.A1_a_at	101256614	LOC101256614	lon protease homolog 2, peroxisomal-like	XM_004245805	Solyc08g077440.2.1				0.016268	2.08208	2.08208										0.000279066	3.92208	3.92208	0.00310478	0.416668	-2.39999	0.00433884	2.60755	2.60755	F:GO:0016887; P:GO:0016558; P:GO:0030163; F:GO:0008236; F:GO:0004252; C:GO:0043233; F:GO:0008233; C:GO:0005782; F:GO:0004176; P:GO:0040007; P:GO:0006510; P:GO:0048527; F:GO:0000166; C:GO:0005777; F:GO:0005524; P:GO:0006515; P:GO:0006625; P:GO:0006508; P:GO:0016560; P:GO:0016485; F:GO:0016787	F:ATPase activity; P:protein import into peroxisome matrix; P:protein catabolic process; F:serine-type peptidase activity; F:serine-type endopeptidase activity; C:organelle lumen; F:peptidase activity; C:peroxisomal matrix; F:ATP-dependent peptidase activity; P:growth; P:obsolete ATP-dependent proteolysis; P:lateral root development; F:nucleotide binding; C:peroxisome; F:ATP binding; P:misfolded …	EC:3.4.21; EC:3.6.1.3; EC:3.6.1.15	Acting on peptide bonds (peptidases); Adenosinetriphosphatase; Nucleoside-triphosphate phosphatase
Les.2503.1.S1_at	101264960	LOC101264960	palmitoyl-protein thioesterase 1-like	XM_004245747	Solyc08g078250.2.1																0.000124865	2.10478	2.10478	3.37488e-05	2.17491	2.17491	4.31928e-06	2.51694	2.51694	P:GO:0098734; F:GO:0098599; F:GO:0016790; C:GO:0005764	P:macromolecule depalmitoylation; F:palmitoyl hydrolase activity; F:thiolester hydrolase activity; C:lysosome
Les.2512.2.S1_at	104644379	LOC104644379	peroxiredoxin-2E-2, chloroplastic	XM_004249412	Solyc10g083650.1.1																						0.0127312	0.290737	-3.43954	F:GO:0016491; P:GO:0055114	F:oxidoreductase activity; P:oxidation-reduction process
Les.2513.3.A1_at	100736469	LOC100736469	autophagy 8f	NM_001247705	Solyc08g078820.2.1																0.00191614	2.19593	2.19593				2.50809e-05	3.09026	3.09026	P:GO:0006914; C:GO:0016020; C:GO:0016021; P:GO:0006995	P:autophagy; C:membrane; C:integral component of membrane; P:cellular response to nitrogen starvation
Les.2515.1.A1_at	101251837	LOC101251837	proteasome assembly chaperone 3-like	XM_004232251	Solyc02g086780.2.1																0.000580325	3.26333	3.26333				0.00450451	2.42764	2.42764	C:GO:0000502	C:proteasome complex
Les.2517.2.S1_at	101257782	LOC101257782	probable pyridoxal biosynthesis protein PDX1	XM_004242475	Solyc06g081980.1.1																0.0301527	0.168935	-5.91945							P:GO:0015994; P:GO:0042823; P:GO:0042538; F:GO:0042803; P:GO:0006520; P:GO:0006982; C:GO:0005774; C:GO:0005886; P:GO:0009723; F:GO:0003824; F:GO:0046982; P:GO:0042819; C:GO:0005829; C:GO:0012505; P:GO:0010335; P:GO:0010224	P:chlorophyll metabolic process; P:pyridoxal phosphate biosynthetic process; P:hyperosmotic salinity response; F:protein homodimerization activity; P:cellular amino acid metabolic process; P:response to lipid hydroperoxide; C:vacuolar membrane; C:plasma membrane; P:response to ethylene; F:catalytic activity; F:protein heterodimerization activity; P:vitamin B6 biosynthetic process; C:cytosol; C:en…
Les.2518.1.A1_at	101257583	LOC101257583	serine acetyltransferase 3, mitochondrial-like	XM_004244017	Solyc07g065340.1.1	0.00875241	0.424067	-2.35812										0.00682892	0.451111	-2.21675	9.89711e-05	5.15872	5.15872	0.0332391	2.08643	2.08643	0.000137365	4.56114	4.56114	P:GO:0042967; C:GO:0005737; F:GO:0009001; P:GO:0019344; C:GO:0005829; F:GO:0016740; P:GO:0006535	P:acyl-carrier-protein biosynthetic process; C:cytoplasm; F:serine O-acetyltransferase activity; P:cysteine biosynthetic process; C:cytosol; F:transferase activity; P:cysteine biosynthetic process from serine	EC:2.3.1.30	Serine O-acetyltransferase
Les.252.1.S1_at	543806	alpha-DOX2	alpha-dioxygenase 2	NM_001247132	Solyc03g119060.2.1																1.66499e-06	0.277287	-3.60637							F:GO:0004601; F:GO:0051213; P:GO:0006979; P:GO:0006804; P:GO:0098869; P:GO:0055114; F:GO:0020037	F:peroxidase activity; F:dioxygenase activity; P:response to oxidative stress; P:obsolete peroxidase reaction; P:cellular oxidant detoxification; P:oxidation-reduction process; F:heme binding	EC:1.11.1.7	Peroxidase
Les.2520.1.A1_at	101258505	LOC101258505	RING finger and transmembrane domain-containing protein 2-like	XM_004248975	Solyc10g074810.1.1																0.0340452	2.50483	2.50483				0.028884	2.46995	2.46995	C:GO:0016020; C:GO:0016021	C:membrane; C:integral component of membrane
Les.2522.1.S1_at	101254712	LOC101254712	50S ribosomal protein L4, chloroplastic-like	XM_004244266 /// XM_004244267	Solyc07g061900.2.1																			0.000900845	0.47649	-2.09868	0.000470751	0.446263	-2.24083	C:GO:0009507; C:GO:0022626; F:GO:0003735; P:GO:0042254; F:GO:0019843; P:GO:0006412	C:chloroplast; C:cytosolic ribosome; F:structural constituent of ribosome; P:ribosome biogenesis; F:rRNA binding; P:translation
Les.2523.1.A1_at	101246742	LOC101246742	nuclear transcription factor Y subunit A-8-like	XM_004245011	Solyc08g062210.2.1																			0.00564127	2.27867	2.27867	0.00564443	2.31198	2.31198	F:GO:0003677; C:GO:0016602; F:GO:0003700; P:GO:0006355; P:GO:0006355	F:DNA binding; C:CCAAT-binding factor complex; F:transcription factor activity, sequence-specific DNA binding; P:regulation of transcription, DNA-templated; P:regulation of transcription, DNA-templated
Les.2529.1.A1_at	101262227	LOC101262227	benzyl alcohol O-benzoyltransferase-like	XM_004243448	Solyc07g049660.2.1				0.0329963	2.74057	2.74057	6.71226e-07	18.1361	18.1361	0.00567485	3.56196	3.56196				1.72417e-06	17.435	17.435	1.09145e-05	10.4314	10.4314	7.19024e-05	7.80782	7.80782	F:GO:0016747	F:transferase activity, transferring acyl groups other than amino-acyl groups
Les.253.1.S1_at	100736441	LOC100736441	BURP domain-containing protein	NM_001247592	Solyc08g068150.2.1																			0.000387081	2.58974	2.58974				C:GO:0005802; C:GO:0005768	C:trans-Golgi network; C:endosome
Les.2534.1.S1_at	100147724	SSR1	succinic semialdehyde reductase isofom1	NM_001246903	Solyc09g018790.2.1																0.00131069	0.494587	-2.02189							F:GO:0004616; F:GO:0050660; F:GO:0051287; P:GO:0006098; C:GO:0016021; P:GO:0055114; P:GO:0019521	F:phosphogluconate dehydrogenase (decarboxylating) activity; F:flavin adenine dinucleotide binding; F:NAD binding; P:pentose-phosphate shunt; C:integral component of membrane; P:oxidation-reduction process; P:D-gluconate metabolic process	EC:1.1.1.44	Phosphogluconate dehydrogenase (NADP(+)-dependent, decarboxylating)
Les.2539.1.A1_at	101261587	LOC101261587	probable membrane-associated kinase regulator 6-like	XM_004234161	Solyc03g007775.1.1																			0.00780116	2.18629	2.18629
Les.254.1.S1_at	544254	THT1-3	N-hydroxycinnamoyl-CoA:tyramine N-hydroxycinnamoyl transferase THT1-3	NM_001247948	Solyc08g068730.1.1																0.0427935	3.5157	3.5157	0.00892981	4.80119	4.80119	2.0566e-06	34.7334	34.7334	P:GO:0008272; P:GO:0042967; F:GO:0050366; F:GO:0008080; C:GO:0044459; F:GO:0015116	P:sulfate transport; P:acyl-carrier-protein biosynthetic process; F:tyramine N-feruloyltransferase activity; F:N-acetyltransferase activity; C:plasma membrane part; F:sulfate transmembrane transporter activity	EC:2.3.1.110	Tyramine N-feruloyltransferase
Les.2540.3.S1_at	101256396	LOC101256396	uncharacterized LOC101256396	XM_004243672	Solyc07g041490.1.1																						0.0444539	0.401962	-2.4878	C:GO:0009570; P:GO:0009817; C:GO:0005634; C:GO:0005777; C:GO:0005829; P:GO:0009753	C:chloroplast stroma; P:defense response to fungus, incompatible interaction; C:nucleus; C:peroxisome; C:cytosol; P:response to jasmonic acid
Les.2541.1.A1_at	101259749	LOC101259749	2-oxoglutarate dehydrogenase, mitochondrial-like	XR_182767	Solyc05g054640.2.1																0.000426393	2.04065	2.04065							F:GO:0030976; F:GO:0016624; F:GO:0004591; C:GO:0045252; C:GO:0005739; P:GO:0006099; P:GO:0055114; P:GO:0006568; P:GO:0006554	F:thiamine pyrophosphate binding; F:oxidoreductase activity, acting on the aldehyde or oxo group of donors, disulfide as acceptor; F:oxoglutarate dehydrogenase (succinyl-transferring) activity; C:oxoglutarate dehydrogenase complex; C:mitochondrion; P:tricarboxylic acid cycle; P:oxidation-reduction process; P:tryptophan metabolic process; P:lysine catabolic process	EC:1.2.4.2	Oxoglutarate dehydrogenase (succinyl-transferring)
Les.2543.1.A1_at	101265793	LOC101265793	non-lysosomal glucosylceramidase-like	XR_183255	Solyc11g042460.1.1																0.0196965	3.21554	3.21554	0.00632107	3.70997	3.70997	0.0242961	2.91306	2.91306	F:GO:0004348; P:GO:0005975; P:GO:0006680; F:GO:0003824; C:GO:0016020; F:GO:0004553; F:GO:0016798; F:GO:0016787	F:glucosylceramidase activity; P:carbohydrate metabolic process; P:glucosylceramide catabolic process; F:catalytic activity; C:membrane; F:hydrolase activity, hydrolyzing O-glycosyl compounds; F:hydrolase activity, acting on glycosyl bonds; F:hydrolase activity	EC:3.2.1.45	Glucosylceramidase
Les.2544.1.A1_at	101246295	LOC101246295	zeatin O-glucosyltransferase-like	XM_004249187	---																1.64171e-05	22.6021	22.6021				0.000244137	10.6448	10.6448
Les.2545.1.S1_at	101246207	LOC101246207	uncharacterized LOC101246207	XM_004233069	Solyc02g070540.2.1																			0.00221094	0.428731	-2.33246				C:GO:0016021	C:integral component of membrane
Les.255.1.A1_at	543620	SUT4	sucrose transporter	NM_001247415	Solyc04g076960.2.1																			0.00731329	0.447388	-2.2352				C:GO:0005887; C:GO:0005801; P:GO:0015770; F:GO:0008515; C:GO:0005773	C:integral component of plasma membrane; C:cis-Golgi network; P:sucrose transport; F:sucrose transmembrane transporter activity; C:vacuole
Les.2559.2.S1_at	101268571	LOC101268571	protein decapping 5-like	XM_004238927	Solyc05g009980.2.1										0.0256823	0.382182	-2.61655				0.0173721	0.331078	-3.02044							F:GO:0042803; P:GO:0031087; P:GO:0010606; P:GO:0033962; C:GO:0000932; C:GO:0005829; P:GO:0017148	F:protein homodimerization activity; P:deadenylation-independent decapping of nuclear-transcribed mRNA; P:positive regulation of cytoplasmic mRNA processing body assembly; P:cytoplasmic mRNA processing body assembly; C:P-body; C:cytosol; P:negative regulation of translation
Les.2559.3.S1_at	101245341	LOC101245341	L-arabinokinase-like	XM_004253232	Solyc00g011890.2.1																0.0475156	0.464303	-2.15377							F:GO:0005524; C:GO:0005737; P:GO:0016310; F:GO:0016773; F:GO:0016301	F:ATP binding; C:cytoplasm; P:phosphorylation; F:phosphotransferase activity, alcohol group as acceptor; F:kinase activity
Les.2560.1.S1_at	544052	ACO1	1-aminocyclopropane-1-carboxylate oxidase 1	NM_001247095	Solyc07g049530.2.1							0.00205427	24.5507	24.5507							4.75435e-05	128.058	128.058	0.00551756	15.9517	15.9517	0.000292586	51.2076	51.2076	F:GO:0051213; F:GO:0031418; F:GO:0009815; F:GO:0046872; P:GO:0009693; P:GO:0055114; P:GO:0009835	F:dioxygenase activity; F:L-ascorbic acid binding; F:1-aminocyclopropane-1-carboxylate oxidase activity; F:metal ion binding; P:ethylene biosynthetic process; P:oxidation-reduction process; P:fruit ripening	EC:1.14.17.4	Aminocyclopropanecarboxylate oxidase
Les.2561.1.S1_at	101247575	LOC101247575	uncharacterized LOC101247575	XM_004231910	Solyc02g091890.1.1																			0.00146103	0.424086	-2.35801				C:GO:0016021	C:integral component of membrane
Les.2562.1.S1_at	101265785	LOC101265785	uncharacterized LOC101265785	XM_004231722	Solyc02g094220.1.1																0.010795	2.25962	2.25962	0.00334622	2.46106	2.46106	0.00312587	2.52069	2.52069	C:GO:0016021	C:integral component of membrane
Les.2565.1.S1_at	101245041	LOC101245041	stromal cell-derived factor 2-like protein-like	XM_004235888	Solyc03g117020.2.1																4.94799e-05	2.16326	2.16326				6.46166e-05	2.05127	2.05127	C:GO:0016020; P:GO:0052033; C:GO:0005783; P:GO:0050832; P:GO:0042742	C:membrane; P:pathogen-associated molecular pattern dependent induction by symbiont of host innate immune response; C:endoplasmic reticulum; P:defense response to fungus; P:defense response to bacterium
Les.2569.1.S1_at	101244582	LOC101244582	NAC transcription factor 29-like	XM_004238762	Solyc05g007770.2.1										0.0294597	0.382878	-2.6118							0.0033667	3.87665	3.87665				C:GO:0005634; F:GO:0003677; P:GO:0006351; P:GO:0006355	C:nucleus; F:DNA binding; P:transcription, DNA-templated; P:regulation of transcription, DNA-templated
Les.2574.2.S1_at	101263403	LOC101263403	26S proteasome non-ATPase regulatory subunit 12-like	XM_004237434	Solyc04g051370.2.1																0.00758103	0.170023	-5.88156							P:GO:0043161; C:GO:0005737; C:GO:0008541; C:GO:0031595	P:proteasome-mediated ubiquitin-dependent protein catabolic process; C:cytoplasm; C:proteasome regulatory particle, lid subcomplex; C:nuclear proteasome complex
Les.2575.3.A1_at	101243954	LOC101243954	SKP1-like protein 1A	XM_004250675	Solyc11g042930.1.1																0.00731489	2.32315	2.32315				0.00150997	2.67368	2.67368	P:GO:0006511	P:ubiquitin-dependent protein catabolic process
Les.2578.1.S1_at	101267503	LOC101267503	ATP-citrate synthase beta chain protein 1-like	XM_004252877	Solyc12g099260.1.1																			0.000204866	0.340326	-2.93836				P:GO:0008152; F:GO:0016829; F:GO:0046912	P:metabolic process; F:lyase activity; F:transferase activity, transferring acyl groups, acyl groups converted into alkyl on transfer
Les.2579.1.A1_at	101264774	LOC101264774	2-hydroxyacyl-CoA lyase-like	XM_004231969 /// XM_004231970	Solyc02g091100.2.1																0.00312185	2.42264	2.42264				0.000191215	3.11039	3.11039	F:GO:0000287; F:GO:0030976; F:GO:0003824; C:GO:0005829	F:magnesium ion binding; F:thiamine pyrophosphate binding; F:catalytic activity; C:cytosol
Les.2582.1.S1_at	101258263	LOC101258263	protein TIC 20-I, chloroplastic-like	XM_004239724	Solyc05g054720.2.1																0.00587036	0.499844	-2.00062				7.76627e-05	0.35079	-2.85071	C:GO:0009706; C:GO:0016021; F:GO:0008565; P:GO:0045037	C:chloroplast inner membrane; C:integral component of membrane; F:protein transporter activity; P:protein import into chloroplast stroma
Les.2583.1.S1_at	101255476	SlSRN1	stress-related NAC1	XM_004252508 /// XM_004252509	Solyc12g056790.1.1																0.000616499	2.29416	2.29416				7.23076e-05	2.62341	2.62341	C:GO:0005634; F:GO:0003677; P:GO:0006351; C:GO:0016021; P:GO:0006355	C:nucleus; F:DNA binding; P:transcription, DNA-templated; C:integral component of membrane; P:regulation of transcription, DNA-templated
Les.2584.2.S1_at	101253330	LOC101253330	uncharacterized LOC101253330	XM_004248710	Solyc10g050110.1.1																						0.0438325	0.490421	-2.03906	P:GO:0016310; F:GO:0016301	P:phosphorylation; F:kinase activity
Les.2587.1.A1_at	101258727	LOC101258727	serine/threonine-protein kinase HT1-like	XM_004234067	Solyc03g006400.2.1																0.0349193	2.8539	2.8539				0.00208077	4.70731	4.70731	F:GO:0005524; C:GO:0005737; F:GO:0004672; P:GO:0006468; F:GO:0004871; P:GO:0035556	F:ATP binding; C:cytoplasm; F:protein kinase activity; P:protein phosphorylation; F:signal transducer activity; P:intracellular signal transduction
Les.259.2.S1_a_at	544073	pds	phytoene desaturase	NM_001247166	Solyc03g123760.2.1																			3.57993e-06	0.477779	-2.09302				C:GO:0009509; P:GO:0016117; C:GO:0009507; F:GO:0016705; P:GO:0055114	C:chromoplast; P:carotenoid biosynthetic process; C:chloroplast; F:oxidoreductase activity, acting on paired donors, with incorporation or reduction of molecular oxygen; P:oxidation-reduction process
Les.2590.2.A1_at	101265815	LOC101265815	39S ribosomal protein L46, mitochondrial-like	XM_004236798	Solyc04g009140.2.1																0.0263746	2.09482	2.09482							F:GO:0003735; P:GO:0042254; C:GO:0005762	F:structural constituent of ribosome; P:ribosome biogenesis; C:mitochondrial large ribosomal subunit
Les.2591.1.S1_at	543987	LOC543987	beta-1,3-glucanase	NM_001247876	Solyc01g060020.2.1							0.00262222	20.392	20.392	0.0089103	0.0815666	-12.2599				0.0304038	8.6771	8.6771	0.00011469	59.6104	59.6104	0.0270565	8.2121	8.2121	P:GO:0006952; C:GO:0005773; F:GO:0042973; P:GO:0005982; P:GO:0005985; C:GO:0046658; F:GO:0030247	P:defense response; C:vacuole; F:glucan endo-1,3-beta-D-glucosidase activity; P:starch metabolic process; P:sucrose metabolic process; C:anchored component of plasma membrane; F:polysaccharide binding	EC:3.2.1.21; EC:3.2.1.39	Beta-glucosidase; Glucan endo-1,3-beta-D-glucosidase
Les.2594.1.S1_at	101264446	LOC101264446	uncharacterized LOC101264446	XM_004244212	Solyc07g062640.2.1							0.00980322	2.01508	2.01508	0.00704551	2.06168	2.06168				0.00363175	2.33313	2.33313
Les.2607.1.S1_at	543877	CCH	copper chaperone	NM_001247418	Solyc05g055310.2.1																			4.03236e-06	2.93398	2.93398				P:GO:0046916; F:GO:0046914; C:GO:0005737; P:GO:0030001	P:cellular transition metal ion homeostasis; F:transition metal ion binding; C:cytoplasm; P:metal ion transport
Les.2609.1.A1_at	101252670	LOC101252670	tubulin-specific chaperone B-like	XM_004235331	Solyc03g098170.2.1																0.0149776	3.66464	3.66464				0.0325832	2.91112	2.91112
Les.2611.2.A1_at	101248677	LOC101248677	calreticulin-3-like	XM_004239608	Solyc05g056230.2.1																0.000527222	2.62738	2.62738				0.000612018	2.47372	2.47372	F:GO:0005509; C:GO:0005783; F:GO:0051082; P:GO:0006457	F:calcium ion binding; C:endoplasmic reticulum; F:unfolded protein binding; P:protein folding
Les.2616.1.A1_at	101264067	LOC101264067	cysteine-rich repeat secretory protein 3-like	XM_019215640	Solyc09g090680.2.1																			0.00644154	0.227118	-4.403				C:GO:0016020; C:GO:0016021	C:membrane; C:integral component of membrane
Les.2619.1.A1_at	101254842	LOC101254842	putative methyltransferase At1g22800	XM_004248003	Solyc10g012160.2.1																0.0160046	3.20572	3.20572							P:GO:0008152; F:GO:0008168; P:GO:0032259	P:metabolic process; F:methyltransferase activity; P:methylation
Les.2620.2.S1_at	101257676	LOC101257676	photosystem II reaction center W protein, chloroplastic-like	XM_004242302	Solyc06g084050.2.1																0.03152	0.462906	-2.16027	0.00274642	0.347193	-2.88024	1.40473e-07	0.0887165	-11.2719	P:GO:0042549; C:GO:0009523; C:GO:0016021; P:GO:0015979; C:GO:0009535	P:photosystem II stabilization; C:photosystem II; C:integral component of membrane; P:photosynthesis; C:chloroplast thylakoid membrane
Les.2620.3.S1_at	101260523	LOC101260523	internalin-A-like	XM_004235857	Solyc03g117420.2.1	0.0277312	0.390165	-2.56302													0.0128615	0.355685	-2.81148							F:GO:0005515	F:protein binding
Les.2623.1.A1_at	100620057	AP2b	AP2 transcription factor SlAP2b	NM_001246979	Solyc02g064960.2.1																						0.00284081	4.40034	4.40034	C:GO:0005634; F:GO:0003677; C:GO:0005667; F:GO:0003700; P:GO:0007275; P:GO:0006355; P:GO:0006355	C:nucleus; F:DNA binding; C:transcription factor complex; F:transcription factor activity, sequence-specific DNA binding; P:multicellular organism development; P:regulation of transcription, DNA-templated; P:regulation of transcription, DNA-templated
Les.2625.1.A1_at	101264839	AGO6	Argonaute 6	NM_001279344//XM_010325298//XM_010325299	Solyc07g049500.2.1																0.0314046	2.09129	2.09129				0.0230399	2.10976	2.10976	F:GO:0003676; P:GO:0031047	F:nucleic acid binding; P:gene silencing by RNA
Les.2627.1.S1_at	778358	MT4	Metallothionein-like protein	NM_001247362	Solyc06g076140.2.1																			0.00012576	2.84711	2.84711	0.00246443	2.1902	2.1902	F:GO:0046872	F:metal ion binding
Les.263.1.S1_at	543991	GP1	polygalacturonase isoenzyme 1 beta subunit	NM_001247906	Solyc05g005560.2.1																						0.000303229	0.387573	-2.58016	C:GO:0005618; C:GO:0048046; P:GO:0071555; P:GO:0009835	C:cell wall; C:apoplast; P:cell wall organization; P:fruit ripening
Les.2643.1.S1_at	101258531	LOC101258531	uncharacterized LOC101258531	XM_004234445	Solyc03g031890.2.1										0.0281941	0.34165	-2.92698
Les.2644.1.A1_at	101255365	LOC101255365	probable histone H2AXa-like	XM_004233968	Solyc03g005220.2.1	0.0193692	2.26862	2.26862													0.0173274	2.0714	2.0714							C:GO:0005634; F:GO:0003677; C:GO:0000790; F:GO:0046982; P:GO:0006342; C:GO:0005694; C:GO:0000786	C:nucleus; F:DNA binding; C:nuclear chromatin; F:protein heterodimerization activity; P:chromatin silencing; C:chromosome; C:nucleosome
Les.2649.1.S1_at	544015	gdh1	glutamate dehydrogenase	NM_001246921	Solyc10g078550.1.1										0.0331113	2.3748	2.3748				0.0082771	3.25454	3.25454				0.00770923	3.11225	3.11225	P:GO:0006118; P:GO:0006525; C:GO:0005759; P:GO:0006560; P:GO:0006541; F:GO:0004353; P:GO:0055114	P:obsolete electron transport; P:arginine metabolic process; C:mitochondrial matrix; P:proline metabolic process; P:glutamine metabolic process; F:glutamate dehydrogenase [NAD(P)+] activity; P:oxidation-reduction process	EC:1.4.1.3	Glutamate dehydrogenase (NAD(P)(+))
Les.2650.1.S1_at	101254084	LOC101254084	uncharacterized LOC101254084	XM_004238026	Solyc04g077500.2.1							0.00102686	0.499329	-2.00269	0.000140738	0.43629	-2.29205				2.00947e-05	0.352774	-2.83468							C:GO:0009507; C:GO:0016021	C:chloroplast; C:integral component of membrane
Les.2659.1.S1_at	101265092	LOC101265092	uncharacterized LOC101265092	XM_004232791	Solyc02g078590.1.1																			7.74562e-05	0.202172	-4.94628	0.000397847	0.246213	-4.06153	P:GO:0001575; F:GO:0050512	P:globoside metabolic process; F:lactosylceramide 4-alpha-galactosyltransferase activity	EC:2.4.1.228	Lactosylceramide 4-alpha-galactosyltransferase
Les.266.1.S1_a_at	543989	LOC543989	systemin	XM_004239956	Solyc05g051750.2.1																0.0143875	0.447145	-2.23641				7.44197e-05	0.246446	-4.05769	C:GO:0005737; P:GO:0007165; F:GO:0005179	C:cytoplasm; P:signal transduction; F:hormone activity
Les.2660.2.S1_at	101252765	LOC101252765	protein TOPLESS-like	XM_004236404	Solyc03g117360.2.1																0.0018443	0.193412	-5.17031				0.00554038	0.256911	-3.8924	P:GO:0006355	P:regulation of transcription, DNA-templated
Les.2665.1.S1_at	101250487	LOC101250487	protein slowmo homolog	XM_004252821 /// XM_004252822	Solyc12g100050.1.1																			1.42301e-05	2.23524	2.23524				C:GO:0005758; P:GO:0015914; F:GO:1990050	C:mitochondrial intermembrane space; P:phospholipid transport; F:phosphatidic acid transporter activity
Les.2667.2.S1_at	101255501	SlWRKY33A	WRKY transcription factor 33A	XM_004241707	Solyc06g066370.2.1				0.0284924	2.03099	2.03099										0.0101377	2.3398	2.3398				0.0067626	2.36313	2.36313	C:GO:0005667; F:GO:0003700; P:GO:0006355; F:GO:0043565; P:GO:0006355	C:transcription factor complex; F:transcription factor activity, sequence-specific DNA binding; P:regulation of transcription, DNA-templated; F:sequence-specific DNA binding; P:regulation of transcription, DNA-templated
Les.2672.1.S1_x_at	101259946	psi14C	inorganic pyrophosphatase 1-like	NM_001279335	Solyc06g062540.2.1																						0.00347419	3.10067	3.10067	F:GO:0016791; P:GO:0016311	F:phosphatase activity; P:dephosphorylation	EC:3.1.3.41	4-nitrophenylphosphatase
Les.2677.3.S1_at	101248497	LOC101248497	2,3-bisphosphoglycerate-independent phosphoglycerate mutase	XM_004243571	Solyc07g044840.2.1																0.0171737	0.172153	-5.80879							P:GO:0006094; C:GO:0005737; P:GO:0006096; F:GO:0004619; F:GO:0030145; P:GO:0006007	P:gluconeogenesis; C:cytoplasm; P:glycolytic process; F:phosphoglycerate mutase activity; F:manganese ion binding; P:glucose catabolic process	EC:5.4.2.1	Intramolecular transferases
Les.2681.2.S1_at	101261866	LOC101261866	ATP-dependent Clp protease proteolytic subunit 3, chloroplastic-like	XM_004231959	Solyc02g091280.2.1																						0.0178463	0.223248	-4.47933	P:GO:0006508; C:GO:0009534; C:GO:0009941; F:GO:0004252; C:GO:0009840	P:proteolysis; C:chloroplast thylakoid; C:chloroplast envelope; F:serine-type endopeptidase activity; C:chloroplastic endopeptidase Clp complex	EC:3.4.21	Acting on peptide bonds (peptidases)
Les.2683.1.A1_at	101261907	LOC101261907	ubiquitin-like modifier-activating enzyme 5-like	XM_004236279	Solyc03g111340.2.1																0.00293648	2.07345	2.07345							C:GO:0005737; F:GO:0008641; F:GO:0071566; P:GO:0071569	C:cytoplasm; F:small protein activating enzyme activity; F:UFM1 activating enzyme activity; P:protein ufmylation
Les.2686.1.A1_at	101262369	LOC101262369	altered inheritance of mitochondria protein 32-like	XM_004231798 /// XM_004231799	Solyc02g093370.2.1																0.00240202	2.09814	2.09814				0.000612925	2.27434	2.27434	C:GO:0016020; C:GO:0016021	C:membrane; C:integral component of membrane
Les.2688.1.S1_at	543794	exp11	expansin11	NM_001247088	Solyc04g081870.2.1																						0.00128283	0.316337	-3.16118	C:GO:0005618; C:GO:0016020; P:GO:0009664; C:GO:0005576	C:cell wall; C:membrane; P:plant-type cell wall organization; C:extracellular region
Les.2689.1.A1_at	101268198	PEPD	peptidase D	XM_004242928	Solyc07g026960.2.1																						0.000214745	2.09299	2.09299
Les.269.1.S1_at	544024	HSP21	heat shock protein	NM_001246971	Solyc03g082420.2.1							2.44602e-05	0.271652	-3.68119										3.35523e-06	0.226863	-4.40794				C:GO:0009507	C:chloroplast
Les.2691.1.S1_at	101252616	LOC101252616	phosphomevalonate kinase	XM_004245877	Solyc08g076140.2.1																0.00280892	2.42518	2.42518	0.0056289	2.12983	2.12983	0.000427993	2.82464	2.82464	F:GO:0005524; P:GO:0016310; P:GO:0006694; F:GO:0004631	F:ATP binding; P:phosphorylation; P:steroid biosynthetic process; F:phosphomevalonate kinase activity	EC:2.7.4.2	Phosphomevalonate kinase
Les.2693.2.S1_at	101267010	LOC101267010	uncharacterized LOC101267010	XM_004253048	Solyc12g095950.1.1																0.0039868	0.191639	-5.21814				0.0239036	0.305173	-3.27683	F:GO:0003723	F:RNA binding
Les.2696.1.S1_at	104648550	LOC104648550	putative lipid-transfer protein DIR1	XM_010325992	Solyc07g065110.1.1							0.0156463	0.359221	-2.7838							0.000376589	0.178825	-5.59207	7.20892e-09	0.0309709	-32.2884	1.48917e-08	0.0336531	-29.7149	F:GO:0008270; C:GO:0009506; F:GO:0005504; C:GO:0005783; P:GO:0009862; F:GO:0043621	F:zinc ion binding; C:plasmodesma; F:fatty acid binding; C:endoplasmic reticulum; P:systemic acquired resistance, salicylic acid mediated signaling pathway; F:protein self-association
Les.270.1.S1_at	543635	DDTFR18	ripening regulated protein DDTFR18	NM_001247469	Solyc04g074850.2.1																0.000567641	8.0049	8.0049	8.2763e-07	26.4573	26.4573	6.70572e-06	17.8986	17.8986	P:GO:0006855; F:GO:0015297; C:GO:0016021; F:GO:0015238	P:drug transmembrane transport; F:antiporter activity; C:integral component of membrane; F:drug transmembrane transporter activity
Les.2700.1.S1_at	101260756	LOC101260756	uncharacterized LOC101260756	XR_182321	Solyc01g044240.2.1	0.00724193	0.194549	-5.14009							0.000565488	0.136408	-7.33095							0.0310768	3.12576	3.12576
Les.2708.2.S1_at	101268828	LOC101268828	flavoprotein WrbA-like	XR_182481	Solyc02g079750.2.1																0.00337601	2.36299	2.36299				0.000489597	2.76753	2.76753	P:GO:0006118; F:GO:0010181; F:GO:0003955; C:GO:0005737; F:GO:0016491; P:GO:0055114; P:GO:0006694; C:GO:0005886	P:obsolete electron transport; F:FMN binding; F:NAD(P)H dehydrogenase (quinone) activity; C:cytoplasm; F:oxidoreductase activity; P:oxidation-reduction process; P:steroid biosynthetic process; C:plasma membrane	EC:1.6.5.2	NAD(P)H dehydrogenase (quinone)
Les.271.1.S1_at	101264078	LOC101264078	5-methyltetrahydropteroyltriglutamate--homocysteine methyltransferase-like	XM_004249326	Solyc10g081510.1.1																0.00351214	0.381776	-2.61934							P:GO:0009086; F:GO:0008705; F:GO:0008270; C:GO:0005829; C:GO:0005576; P:GO:0050667; F:GO:0003871; P:GO:0032259	P:methionine biosynthetic process; F:methionine synthase activity; F:zinc ion binding; C:cytosol; C:extracellular region; P:homocysteine metabolic process; F:5-methyltetrahydropteroyltriglutamate-homocysteine S-methyltransferase activity; P:methylation	EC:2.1.1.13; EC:2.1.1.14	Methionine synthase; 5-methyltetrahydropteroyltriglutamate--homocysteine S-methyltransferase
Les.2717.1.S1_at	101265497	LOC101265497	uncharacterized LOC101265497	XM_004232211	Solyc02g087330.2.1																0.00113128	2.43546	2.43546				0.0029502	2.13192	2.13192	C:GO:0016021	C:integral component of membrane
Les.2720.1.A1_at	101257308	LOC101257308	cardiolipin synthase (CMP-forming), mitochondrial	XM_004248353	Solyc10g005290.2.1	0.0431141	2.29592	2.29592													0.00966761	2.85506	2.85506				0.0406332	2.15262	2.15262	F:GO:0008808; C:GO:0016020; C:GO:0005739; P:GO:0008654; F:GO:0016780; F:GO:0030145; F:GO:0016740; P:GO:0032049	F:cardiolipin synthase activity; C:membrane; C:mitochondrion; P:phospholipid biosynthetic process; F:phosphotransferase activity, for other substituted phosphate groups; F:manganese ion binding; F:transferase activity; P:cardiolipin biosynthetic process
Les.2721.1.A1_at	101245564	MBF1	multiprotein-bridging factor 1b-like	XM_004244234	Solyc07g062400.2.1																			0.00367282	2.41492	2.41492	0.00126669	2.77327	2.77327	F:GO:0003677; F:GO:0043565	F:DNA binding; F:sequence-specific DNA binding
Les.2722.1.S1_at	101256108	LOC101256108	ubiquitin carboxyl-terminal hydrolase 15-like	XM_004244271	Solyc07g061780.2.1																0.000420638	0.438208	-2.28202							P:GO:0016579; F:GO:0046872; C:GO:0016021; F:GO:0036459; P:GO:0006511	P:protein deubiquitination; F:metal ion binding; C:integral component of membrane; F:thiol-dependent ubiquitinyl hydrolase activity; P:ubiquitin-dependent protein catabolic process	EC:3.4.19.12	Ubiquitinyl hydrolase 1
Les.2723.2.S1_at	101252078	LOC101252078	uncharacterized LOC101252078	XM_004238019	Solyc04g077670.2.1																						0.00807989	0.437263	-2.28695	P:GO:0019748; F:GO:0016747; P:GO:0006508	P:secondary metabolic process; F:transferase activity, transferring acyl groups other than amino-acyl groups; P:proteolysis
Les.2729.1.A1_at	101257481	LOC101257481	transcription factor VIP1-like	XM_004241968	Solyc06g060490.2.1																0.00130802	2.42388	2.42388				0.00434171	2.07062	2.07062	C:GO:0005634; C:GO:0005667; F:GO:0003700; P:GO:0006355; P:GO:0006355	C:nucleus; C:transcription factor complex; F:transcription factor activity, sequence-specific DNA binding; P:regulation of transcription, DNA-templated; P:regulation of transcription, DNA-templated
Les.2733.1.S1_at	543932	LOC543932	wound/stress protein	NM_001247603	Solyc03g096460.2.1																			0.006294	0.216748	-4.61366	0.00183658	0.161346	-6.19785	C:GO:0016021	C:integral component of membrane
Les.2738.1.S1_at	101252606	LOC101252606	uncharacterized LOC101252606	XM_004244172 /// XM_004244173	Solyc07g063240.2.1							0.00045329	2.76659	2.76659							0.00044812	2.91589	2.91589							C:GO:0005634; C:GO:0009507; P:GO:0006952; P:GO:0010267	C:nucleus; C:chloroplast; P:defense response; P:production of ta-siRNAs involved in RNA interference
Les.2746.1.S1_at	101267923	LOC101267923	probable glutathione S-transferase-like	XR_183073	Solyc09g011510.2.1																0.00509878	2.92688	2.92688				0.0368065	2.07642	2.07642	P:GO:0006803; P:GO:0009407; C:GO:0005737; P:GO:0006749; F:GO:0004364; P:GO:0009734	P:obsolete glutathione conjugation reaction; P:toxin catabolic process; C:cytoplasm; P:glutathione metabolic process; F:glutathione transferase activity; P:auxin-activated signaling pathway	EC:2.5.1.18	Glutathione transferase
Les.2747.1.S1_at	101262853	LOC101262853	3-ketoacyl-CoA thiolase 2, peroxisomal	XM_004247055	Solyc09g061840.2.1				0.0490673	2.71474	2.71474	1.6017e-05	12.2807	12.2807	0.0260778	2.6895	2.6895				2.70652e-06	15.9968	15.9968	0.00112148	4.72519	4.72519	3.7093e-05	8.7703	8.7703	F:GO:0016747; P:GO:0008152	F:transferase activity, transferring acyl groups other than amino-acyl groups; P:metabolic process
Les.2749.1.S1_at	101246095	LOC101246095	autophagy-related protein 8C-like	XM_004248314 /// XM_004248315 /// XM_004248316	Solyc10g006270.2.1																			0.000948153	2.02958	2.02958				P:GO:0006914	P:autophagy
Les.275.1.S1_at	544250	fdh	formate dehydrogenase	NM_001247928	Solyc02g086880.2.1																			0.00890117	4.10882	4.10882				P:GO:0042183; F:GO:0051287; P:GO:0046487; C:GO:0005739; F:GO:0004617; F:GO:0008863; P:GO:0006564; P:GO:0015947; P:GO:0055114; P:GO:0006544; P:GO:0006566; C:GO:0009326	P:formate catabolic process; F:NAD binding; P:glyoxylate metabolic process; C:mitochondrion; F:phosphoglycerate dehydrogenase activity; F:formate dehydrogenase (NAD+) activity; P:L-serine biosynthetic process; P:methane metabolic process; P:oxidation-reduction process; P:glycine metabolic process; P:threonine metabolic process; C:formate dehydrogenase complex	EC:1.1.1.95; EC:1.2.1.2	Phosphoglycerate dehydrogenase; Formate dehydrogenase
Les.2752.1.S1_at	101245881	LOC101245881	serine/threonine-protein phosphatase PP2A-5 catalytic subunit	XM_004229284	Solyc01g073650.2.1																5.0924e-05	0.417545	-2.39495							F:GO:0004721; C:GO:0005737; F:GO:0046872; P:GO:0006470	F:phosphoprotein phosphatase activity; C:cytoplasm; F:metal ion binding; P:protein dephosphorylation	EC:3.1.3.16; EC:3.1.3.41	Protein-serine/threonine phosphatase; 4-nitrophenylphosphatase
Les.2756.1.A1_at	101261400	LOC101261400	tryptophan synthase beta chain 2	XM_004253029	Solyc12g096190.1.1																			0.000339268	2.68817	2.68817	0.000215491	2.85907	2.85907	F:GO:0004834; F:GO:0030170; P:GO:0009094; P:GO:0000162; C:GO:0005737; F:GO:0052684; P:GO:0006571	F:tryptophan synthase activity; F:pyridoxal phosphate binding; P:L-phenylalanine biosynthetic process; P:tryptophan biosynthetic process; C:cytoplasm; F:L-serine hydro-lyase (adding indole, L-tryptophan-forming) activity; P:tyrosine biosynthetic process	EC:4.2.1.20	Tryptophan synthase
Les.2759.1.S1_at	101258872	LOC101258872	probable chlorophyll(ide) b reductase NYC1, chloroplastic-like	XM_004242907	Solyc07g024000.2.1																			1.93959e-09	0.14126	-7.07914	0.00182122	0.484512	-2.06393	C:GO:0016021; P:GO:0055114; F:GO:0034256; P:GO:0010304; P:GO:0015996	C:integral component of membrane; P:oxidation-reduction process; F:chlorophyll(ide) b reductase activity; P:PSII associated light-harvesting complex II catabolic process; P:chlorophyll catabolic process	EC:1.1.1.294	Chlorophyll(ide) b reductase
Les.2763.2.A1_at	101253706	LOC101253706	ABC transporter C family member 2-like	XM_004244484	Solyc08g006880.2.1																0.001009	2.30254	2.30254				0.00137438	2.15373	2.15373	F:GO:0016887; F:GO:0000166; F:GO:0005524; F:GO:0042626; P:GO:0055085; C:GO:0016020; C:GO:0016021; C:GO:0000325; C:GO:0005774; P:GO:0006810	F:ATPase activity; F:nucleotide binding; F:ATP binding; F:ATPase activity, coupled to transmembrane movement of substances; P:transmembrane transport; C:membrane; C:integral component of membrane; C:plant-type vacuole; C:vacuolar membrane; P:transport	EC:3.6.1.3; EC:3.6.1.15	Adenosinetriphosphatase; Nucleoside-triphosphate phosphatase
Les.2765.3.S1_at	101245344	LOC101245344	hypersensitive-induced response protein 1-like	XM_004236140 /// XM_004236141 /// XM_004236142	Solyc03g113220.2.1							0.00139377	2.77648	2.77648							0.000343419	4.61017	4.61017	0.0358897	2.12807	2.12807	0.00809031	2.72149	2.72149	C:GO:0016020	C:membrane
Les.2767.1.S1_at	544276	LOC544276	isocitrate lyase	NM_001246949	Solyc07g052480.2.1							0.0390486	0.336652	-2.97043	0.0406766	0.346404	-2.8868				0.00774889	0.217185	-4.60438	7.15419e-06	0.0581412	-17.1995	7.34465e-05	0.0895861	-11.1625	P:GO:0006097; F:GO:0046872; P:GO:0006099; F:GO:0004451; F:GO:0046912; C:GO:0009514	P:glyoxylate cycle; F:metal ion binding; P:tricarboxylic acid cycle; F:isocitrate lyase activity; F:transferase activity, transferring acyl groups, acyl groups converted into alkyl on transfer; C:glyoxysome	EC:4.1.3.1	Isocitrate lyase
Les.2774.1.A1_at	101267182	LOC101267182	acetylglutamate kinase, chloroplastic-like	XM_004249835	---																						0.0226291	2.25658	2.25658
Les.2779.2.S1_at	101248617	LOC101248617	uncharacterized LOC101248617	XM_004230007	Solyc01g096780.2.1																0.0233868	0.499192	-2.00324							C:GO:0016021	C:integral component of membrane
Les.278.1.S1_at	---	---	Unknown Protein	---	Solyc09g010430.1.1																			0.00706126	0.323841	-3.08794
Les.2780.2.A1_at	101258239	LOC101258239	small nuclear ribonucleoprotein E	XM_004235350	Solyc03g098470.2.1																0.0460945	2.64514	2.64514							C:GO:0030529; C:GO:0071011; C:GO:0046540; C:GO:0005682; C:GO:0005681; C:GO:0005686; C:GO:0005685; P:GO:0000387; P:GO:0000398; C:GO:0005687	C:intracellular ribonucleoprotein complex; C:precatalytic spliceosome; C:U4/U6 x U5 tri-snRNP complex; C:U5 snRNP; C:spliceosomal complex; C:U2 snRNP; C:U1 snRNP; P:spliceosomal snRNP assembly; P:mRNA splicing, via spliceosome; C:U4 snRNP
Les.2792.1.A1_at	101265833	LOC101265833	uncharacterized LOC101265833	XM_004241657	Solyc06g067980.2.1																						0.034179	4.73319	4.73319
Les.28.2.S1_a_at	101265831	NRT2.2	putative high-affinity nitrate transporter	NM_001279334	Solyc06g074990.1.1																						0.00250547	6.15989	6.15989	P:GO:0055085; C:GO:0016021	P:transmembrane transport; C:integral component of membrane
Les.280.2.A1_at	101251480	MSRA3	peptide methionine sulfoxide reductase-like	XM_004240719	Solyc06g034020.2.1																						0.00281637	2.60519	2.60519	F:GO:0016491; P:GO:0006464; F:GO:0008113; P:GO:0055114	F:oxidoreductase activity; P:cellular protein modification process; F:peptide-methionine (S)-S-oxide reductase activity; P:oxidation-reduction process	EC:1.8.4.11	Peptide-methionine (S)-S-oxide reductase
Les.2809.1.S1_at	101265706	LOC101265706	zeatin O-glucosyltransferase-like	XM_004251696 /// XM_004251697	Solyc12g009930.1.1																			6.08047e-06	3.28344	3.28344	0.00027206	0.41215	-2.4263	F:GO:0008194; P:GO:0052696; F:GO:0016758; C:GO:0043231; P:GO:0009813	F:UDP-glycosyltransferase activity; P:flavonoid glucuronidation; F:transferase activity, transferring hexosyl groups; C:intracellular membrane-bounded organelle; P:flavonoid biosynthetic process
Les.281.1.S1_at	101249624	LOC101249624	4-coumarate--CoA ligase 1-like	XM_004235822	Solyc03g117870.2.1																0.000145215	2.51971	2.51971							F:GO:0005524; P:GO:0009805; F:GO:0016207; P:GO:0009809; P:GO:0009811	F:ATP binding; P:coumarin biosynthetic process; F:4-coumarate-CoA ligase activity; P:lignin biosynthetic process; P:stilbene biosynthetic process	EC:6.2.1.12	4-coumarate--CoA ligase
Les.2810.1.A1_at	101252897	LOC101252897	heptahelical transmembrane protein 2-like	XM_004242578	Solyc07g006020.2.1										0.0449176	0.389496	-2.56742							1.81428e-05	0.301222	-3.31981	0.000100513	0.345744	-2.89231	P:GO:0007165; C:GO:0016020; C:GO:0016021; P:GO:0009725; F:GO:0004872	P:signal transduction; C:membrane; C:integral component of membrane; P:response to hormone; F:receptor activity
Les.2811.1.S1_at	101255960	LOC101255960	uncharacterized LOC101255960	XM_004234142	Solyc03g007520.2.1																0.0227473	0.387368	-2.58152							P:GO:0006448; F:GO:0003746; C:GO:0005840	P:regulation of translational elongation; F:translation elongation factor activity; C:ribosome
Les.2813.1.S1_at	101245851	LOC101245851	bifunctional polymyxin resistance protein ArnA-like	XM_004241251	Solyc06g074670.2.1										0.0191703	0.400372	-2.49768				0.0391186	0.427737	-2.33789				0.035532	0.438026	-2.28297	F:GO:0050662; F:GO:0003824	F:coenzyme binding; F:catalytic activity
Les.2817.1.S1_at	101246135	LOC101246135	ATP-citrate synthase alpha chain protein 2-like	XM_004238599	Solyc05g005160.2.1							0.0227171	0.282887	-3.53499													0.0143448	0.25401	-3.93686	F:GO:0005524	F:ATP binding
Les.2820.2.S1_at	101252851	LOC101252851	alpha-1,4 glucan phosphorylase L-1 isozyme, chloroplastic/amyloplastic-like	XM_004234800	Solyc03g065340.2.1																0.00797489	0.228206	-4.382				0.0479615	0.364344	-2.74466	C:GO:0009570; F:GO:0008184; F:GO:0030170; F:GO:0042802; C:GO:0009501; P:GO:0005980; P:GO:0009414	C:chloroplast stroma; F:glycogen phosphorylase activity; F:pyridoxal phosphate binding; F:identical protein binding; C:amyloplast; P:glycogen catabolic process; P:response to water deprivation	EC:2.4.1.1	Glycogen phosphorylase
Les.2822.1.A1_at	101261951	LOC101261951	universal stress protein PHOS32	XM_004228958	Solyc01g059930.2.1																0.000177957	2.06367	2.06367	6.22435e-05	2.10153	2.10153	9.11203e-07	2.80652	2.80652	P:GO:0006950	P:response to stress
Les.2823.1.S1_at	101260394	LOC101260394	p21-activated protein kinase-interacting protein 1-like	XM_004232775	Solyc02g078830.2.1	1.67199e-07	2.56655	2.56655							0.01606	0.432617	-2.31151										0.0423973	0.494342	-2.02289	C:GO:0005730; C:GO:0080008	C:nucleolus; C:Cul4-RING E3 ubiquitin ligase complex
Les.2824.1.S1_at	101250354	LOC101250354	acyl-coenzyme A oxidase 4, peroxisomal-like	XM_004249534	Solyc10g085200.1.1																0.00600437	0.329705	-3.03301							F:GO:0003995; P:GO:0006637; F:GO:0003997; P:GO:0006118; F:GO:0050660; P:GO:0055114	F:acyl-CoA dehydrogenase activity; P:acyl-CoA metabolic process; F:acyl-CoA oxidase activity; P:obsolete electron transport; F:flavin adenine dinucleotide binding; P:oxidation-reduction process	EC:1.3.99.3; EC:1.3.3.6	Acting on the CH-CH group of donors; Acyl-CoA oxidase
Les.2825.2.A1_at	101259384	SAP5	stress-associated protein 5	XM_004249144 /// XM_004249145	Solyc10g079080.1.1																0.0232651	2.12072	2.12072				0.0071579	2.38676	2.38676	F:GO:0003677; F:GO:0008270; F:GO:0046872	F:DNA binding; F:zinc ion binding; F:metal ion binding
Les.2826.2.A1_at	101261832	LOC101261832	probable galacturonosyltransferase 6-like	XM_004242525	Solyc07g005360.2.1																						0.0471353	2.09367	2.09367	F:GO:0016757; F:GO:0047262; C:GO:0016020; C:GO:0016021; P:GO:0045489; C:GO:0005794; C:GO:0000139; P:GO:0071555; F:GO:0016740; P:GO:0005982; P:GO:0005985; P:GO:0009117	F:transferase activity, transferring glycosyl groups; F:polygalacturonate 4-alpha-galacturonosyltransferase activity; C:membrane; C:integral component of membrane; P:pectin biosynthetic process; C:Golgi apparatus; C:Golgi membrane; P:cell wall organization; F:transferase activity; P:starch metabolic process; P:sucrose metabolic process; P:nucleotide metabolic process	EC:2.4.1.43	Polygalacturonate 4-alpha-galacturonosyltransferase
Les.2832.1.S1_at	544293	cevi16	peroxidase	NM_001247041	Solyc01g105070.2.1																0.000456685	21.1244	21.1244				0.00738795	8.02769	8.02769	F:GO:0004601; P:GO:0006979; F:GO:0046872; P:GO:0006804; C:GO:0016021; P:GO:0098869; P:GO:0009664; P:GO:0055114; C:GO:0005576; C:GO:0009505; F:GO:0020037; P:GO:0042744	F:peroxidase activity; P:response to oxidative stress; F:metal ion binding; P:obsolete peroxidase reaction; C:integral component of membrane; P:cellular oxidant detoxification; P:plant-type cell wall organization; P:oxidation-reduction process; C:extracellular region; C:plant-type cell wall; F:heme binding; P:hydrogen peroxide catabolic process	EC:1.11.1.7	Peroxidase
Les.2839.1.S1_at	544158	LOC544158	extensin	XM_004237723	Solyc04g071070.2.1				0.0495631	0.366299	-2.73001										0.0047335	4.5653	4.5653	0.00160364	5.08315	5.08315				C:GO:0005618; P:GO:0009664; F:GO:0005199; P:GO:0042546	C:cell wall; P:plant-type cell wall organization; F:structural constituent of cell wall; P:cell wall biogenesis
Les.2842.2.A1_at	101250067	LOC101250067	uncharacterized LOC101250067	XM_004231837 /// XM_004231838	Solyc02g092880.2.1																0.00596746	10.6249	10.6249	0.0163812	6.60627	6.60627	0.00224312	12.8821	12.8821	P:GO:0009793	P:embryo development ending in seed dormancy
Les.2844.1.S1_at	100736451	BAM1	beta-amylase	NM_001247627	Solyc09g091030.2.1																			0.00815975	3.05891	3.05891				C:GO:0005634; F:GO:0016161; C:GO:0005829; P:GO:0005983; P:GO:0005985	C:nucleus; F:beta-amylase activity; C:cytosol; P:starch catabolic process; P:sucrose metabolic process	EC:3.2.1.2	Beta-amylase
Les.2845.1.S1_at	101267596	LOC101267596	protein BONZAI 1-like	XM_004235798	Solyc03g118200.2.1							0.014324	3.47345	3.47345							0.0117199	3.86486	3.86486							P:GO:0060548; F:GO:0005544	P:negative regulation of cell death; F:calcium-dependent phospholipid binding
Les.2846.1.S1_at	101254911	LOC101254911	uncharacterized LOC101254911	XM_004242672	Solyc07g007330.1.1																0.0134029	0.272271	-3.67282
Les.2850.1.S1_at	101244010	LOC101244010	uncharacterized LOC101244010	XR_742230	Solyc07g009230.2.1																			0.000221955	29.4259	29.4259				P:GO:0031640; P:GO:0050832	P:killing of cells of other organism; P:defense response to fungus
Les.2851.1.A1_at	101267559	LOC101267559	uncharacterized LOC101267559	XM_004229903	Solyc01g095070.2.1							0.0197015	2.03159	2.03159													1.60507e-05	4.70412	4.70412	P:GO:0046916; F:GO:0046914; F:GO:0046872; C:GO:0005737; P:GO:0030001	P:cellular transition metal ion homeostasis; F:transition metal ion binding; F:metal ion binding; C:cytoplasm; P:metal ion transport
Les.2852.1.S1_at	543979	LOC543979	NP24 protein precursor	XM_004245582	Solyc08g080640.1.1							0.00803023	14.4496	14.4496	0.0410506	0.141697	-7.05734				0.00705933	17.4479	17.4479	0.000359422	44.3606	44.3606	0.00877807	13.9447	13.9447	P:GO:0031640; P:GO:0050832; C:GO:0005773	P:killing of cells of other organism; P:defense response to fungus; C:vacuole
Les.2854.1.S1_at	101055516	LOC101055516	Hop-interacting protein THI026	XM_004236512	Solyc04g018110.1.1																0.0117239	2.54254	2.54254	0.0310511	2.07856	2.07856	0.0248494	2.17789	2.17789	F:GO:0005509	F:calcium ion binding
Les.2856.1.S1_at	101243864	LOC101243864	cytochrome b6-f complex iron-sulfur subunit, chloroplastic-like	XM_004251454	Solyc12g005630.1.1																						0.000340459	0.462957	-2.16003	P:GO:0006118; F:GO:0009496; F:GO:0046872; C:GO:0016021; C:GO:0009512; P:GO:0015979; P:GO:0055114; F:GO:0045158; F:GO:0051537; C:GO:0009535	P:obsolete electron transport; F:plastoquinol--plastocyanin reductase activity; F:metal ion binding; C:integral component of membrane; C:cytochrome b6f complex; P:photosynthesis; P:oxidation-reduction process; F:electron transporter, transferring electrons within cytochrome b6/f complex of photosystem II activity; F:2 iron, 2 sulfur cluster binding; C:chloroplast thylakoid membrane	EC:1.10.9; EC:1.10.9.1	Acting on diphenols and related substances as donors; Plastoquinol--plastocyanin reductase
Les.2856.3.S1_at	101251468	LOC101251468	uncharacterized LOC101251468	XM_004237853	Solyc04g073970.2.1																			0.0148593	0.445876	-2.24277	0.0122055	0.427704	-2.33806
Les.2857.1.S1_at	101245530	LOC101245530	uncharacterized LOC101245530	XM_004235311	Solyc03g096840.2.1																			0.000112663	0.4666	-2.14316	9.92099e-05	0.456386	-2.19113
Les.2859.2.A1_at	101255868	LOC101255868	probable E3 ubiquitin-protein ligase RHG1A	XM_004253010	Solyc12g096420.1.1																0.000620948	5.3324	5.3324	0.030905	2.47287	2.47287	0.00116924	4.43422	4.43422
Les.286.1.A1_at	101267496	LOC101267496	uncharacterized LOC101267496	XM_004234874	Solyc03g071550.1.1																0.00245431	2.56315	2.56315				0.00127955	2.63006	2.63006	F:GO:0008270; P:GO:0042967; F:GO:0008080	F:zinc ion binding; P:acyl-carrier-protein biosynthetic process; F:N-acetyltransferase activity
Les.2860.1.S1_at	101248086	LOC101248086	50S ribosomal protein L6, chloroplastic-like	XM_004252812	Solyc12g100160.1.1																			0.00426255	0.450588	-2.21932	0.000242148	0.328412	-3.04496	F:GO:0003735; P:GO:0002181; P:GO:0042254; C:GO:0005840; F:GO:0019843	F:structural constituent of ribosome; P:cytoplasmic translation; P:ribosome biogenesis; C:ribosome; F:rRNA binding
Les.2861.1.S1_at	101266410	LOC101266410	uncharacterized LOC101266410	XM_004236800	Solyc04g009050.2.1	0.000957616	0.44417	-2.25139										0.000378815	0.450056	-2.22195
Les.2862.1.A1_at	101257054	LOC101257054	25.3 kDa vesicle transport protein-like	XM_004235516	Solyc03g122090.2.1																0.00137535	2.50828	2.50828				0.00122906	2.42676	2.42676	P:GO:0016192; P:GO:0006906; C:GO:0016020; F:GO:0005484; C:GO:0016021; C:GO:0031201; F:GO:0000149; P:GO:0006810; P:GO:0006887	P:vesicle-mediated transport; P:vesicle fusion; C:membrane; F:SNAP receptor activity; C:integral component of membrane; C:SNARE complex; F:SNARE binding; P:transport; P:exocytosis
Les.2868.2.S1_at	101256002	LOC101256002	uncharacterized LOC101256002	XM_004240901	Solyc06g051810.2.1																0.00593863	0.359649	-2.78049							P:GO:0090502; F:GO:0004526; P:GO:0008033; P:GO:0051252; P:GO:0031047; C:GO:0005655	P:RNA phosphodiester bond hydrolysis, endonucleolytic; F:ribonuclease P activity; P:tRNA processing; P:regulation of RNA metabolic process; P:gene silencing by RNA; C:nucleolar ribonuclease P complex	EC:3.1.30; EC:3.1.26; EC:3.1.26.5	Acting on ester bonds; Acting on ester bonds; Ribonuclease P
Les.2874.2.S1_a_at	101266797	LOC101266797	signal recognition particle receptor subunit alpha-like	XM_004251700	Solyc12g009990.1.1																0.0128083	0.232835	-4.29488							F:GO:0005525; P:GO:0006614; F:GO:0003924; C:GO:0005783; P:GO:0006886; C:GO:0005785; P:GO:0006810; F:GO:0005047; C:GO:0005786	F:GTP binding; P:SRP-dependent cotranslational protein targeting to membrane; F:GTPase activity; C:endoplasmic reticulum; P:intracellular protein transport; C:signal recognition particle receptor complex; P:transport; F:signal recognition particle binding; C:signal recognition particle, endoplasmic reticulum targeting	EC:3.6.1.15	Nucleoside-triphosphate phosphatase
Les.2878.1.S1_at	101253694	LOC101253694	protein kish-A-like	XM_004241619	---																0.00435551	0.481216	-2.07807
Les.2879.3.S1_at	101268824	LOC101268824	uncharacterized LOC101268824	XM_004250090	Solyc11g010480.1.1																0.0172414	0.275247	-3.6331	0.0032501	0.212941	-4.69613	0.00378458	0.213642	-4.68073	C:GO:0016021; C:GO:0009535	C:integral component of membrane; C:chloroplast thylakoid membrane
Les.2884.1.S1_at	543998	gs	glutamine synthetase	XM_004229413	Solyc01g080280.2.1																			0.000592926	0.495163	-2.01954	2.47287e-06	0.32517	-3.07532	F:GO:0005524; C:GO:0009507; P:GO:0009252; P:GO:0006542; F:GO:0004356	F:ATP binding; C:chloroplast; P:peptidoglycan biosynthetic process; P:glutamine biosynthetic process; F:glutamate-ammonia ligase activity	EC:6.3.1.2	Glutamate--ammonia ligase
Les.2886.1.A1_at	101261079	LOC101261079	protein REVEILLE 1	XM_004231576	Solyc02g036370.2.1	0.00103425	0.212693	-4.70162				0.0463661	2.19733	2.19733				0.00675	0.33435	-2.99087				0.00038491	0.215846	-4.63293	0.00207651	3.67391	3.67391	C:GO:0005634; F:GO:0003677; P:GO:0006351; P:GO:0010600; P:GO:0006355; P:GO:0009851; P:GO:0009734	C:nucleus; F:DNA binding; P:transcription, DNA-templated; P:regulation of auxin biosynthetic process; P:regulation of transcription, DNA-templated; P:auxin biosynthetic process; P:auxin-activated signaling pathway
Les.2888.1.S1_at	101266713	LOC101266713	glyceraldehyde-3-phosphate dehydrogenase A, chloroplastic-like	XM_004236801	Solyc04g009030.2.1																						2.96235e-06	0.276065	-3.62233	F:GO:0050661; F:GO:0051287; P:GO:0055114; P:GO:0006006; F:GO:0016620	F:NADP binding; F:NAD binding; P:oxidation-reduction process; P:glucose metabolic process; F:oxidoreductase activity, acting on the aldehyde or oxo group of donors, NAD or NADP as acceptor
Les.2891.1.S1_at	101254307	LOC101254307	non-specific lipid-transfer protein-like protein At5g64080	XM_004242290 /// XM_004242291	Solyc06g084190.2.1										2.68827e-05	2.21947	2.21947													P:GO:0006869; F:GO:0008289	P:lipid transport; F:lipid binding
Les.2895.2.S1_at	101266846	LOC101266846	methylthioribose-1-phosphate isomerase-like	XM_004244811	Solyc08g022210.2.1																0.0407568	0.259503	-3.85352							C:GO:0005634; C:GO:0009506; C:GO:0005737; P:GO:0019284; P:GO:0019509; F:GO:0046523	C:nucleus; C:plasmodesma; C:cytoplasm; P:L-methionine salvage from S-adenosylmethionine; P:L-methionine salvage from methylthioadenosine; F:S-methyl-5-thioribose-1-phosphate isomerase activity	EC:5.3.1.23	S-methyl-5-thioribose-1-phosphate isomerase
Les.2896.1.S1_at	101259493	LOC101259493	photosystem II stability/assembly factor HCF136, chloroplastic-like	XM_004231433	Solyc02g014150.2.1																			2.36442e-05	0.425762	-2.34873	9.63142e-07	0.335154	-2.98371	C:GO:0030095; P:GO:0006461; C:GO:0009941; C:GO:0009533; C:GO:0009543; P:GO:0015979; P:GO:0046686; P:GO:0009735; P:GO:0009657	C:chloroplast photosystem II; P:protein complex assembly; C:chloroplast envelope; C:chloroplast stromal thylakoid; C:chloroplast thylakoid lumen; P:photosynthesis; P:response to cadmium ion; P:response to cytokinin; P:plastid organization
Les.2897.1.S1_at	544225	PDF1A	peptide deformylase-like protein	NM_001247774	Solyc07g015860.2.1																			6.92266e-05	0.395318	-2.52961	9.60237e-09	0.17904	-5.58535	C:GO:0009570; F:GO:0005506; C:GO:0005739; P:GO:0043686; F:GO:0042586; C:GO:0009505; P:GO:0006412	C:chloroplast stroma; F:iron ion binding; C:mitochondrion; P:co-translational protein modification; F:peptide deformylase activity; C:plant-type cell wall; P:translation	EC:3.5.1.88	Peptide deformylase
Les.2899.2.S1_at	101253577	E4	peptide methionine sulfoxide reductase	NM_001320202	Solyc03g111720.2.1																0.00837634	3.53106	3.53106							P:GO:0030091; P:GO:0006979; P:GO:0006464; F:GO:0008113; P:GO:0055114	P:protein repair; P:response to oxidative stress; P:cellular protein modification process; F:peptide-methionine (S)-S-oxide reductase activity; P:oxidation-reduction process	EC:1.8.4.11	Peptide-methionine (S)-S-oxide reductase
Les.2903.1.S1_at	101260427	LOC101260427	protein EXORDIUM-like	XM_010321880	Solyc04g074410.1.1																			0.0196673	0.351635	-2.84386				P:GO:0080167; C:GO:0005794; P:GO:0009741; C:GO:0009505; P:GO:0040007; C:GO:0005615; C:GO:0009507; C:GO:0009506; P:GO:0001666; C:GO:0016020; C:GO:0048046; C:GO:0005829; P:GO:0050832	P:response to karrikin; C:Golgi apparatus; P:response to brassinosteroid; C:plant-type cell wall; P:growth; C:extracellular space; C:chloroplast; C:plasmodesma; P:response to hypoxia; C:membrane; C:apoplast; C:cytosol; P:defense response to fungus
Les.2904.2.A1_at	101260255	LOC101260255	uncharacterized LOC101260255	XM_004246064	Solyc08g081130.2.1																0.00701352	2.11604	2.11604
Les.2908.1.S1_at	101264864	LOC101264864	vesicle-fusing ATPase-like	XM_004230480	Solyc01g104920.2.1																0.0222577	0.357462	-2.7975							F:GO:0005524	F:ATP binding
Les.2914.1.S1_at	101244882	LOC101244882	glycine cleavage system H protein, mitochondrial-like	XM_004241925	Solyc06g061070.2.1																						2.40975e-05	0.360628	-2.77294	C:GO:0005739; P:GO:0006563; P:GO:0019464; F:GO:0004047; C:GO:0005960; P:GO:0032259; P:GO:0006566	C:mitochondrion; P:L-serine metabolic process; P:glycine decarboxylation via glycine cleavage system; F:aminomethyltransferase activity; C:glycine cleavage complex; P:methylation; P:threonine metabolic process	EC:2.1.2.10	Aminomethyltransferase
Les.2915.2.S1_at	101254582	LOC101254582	uncharacterized LOC101254582	XM_004235837	Solyc03g117680.2.1	0.014665	0.283057	-3.53286							0.00478715	0.262611	-3.80791	0.0237206	0.376381	-2.65688
Les.2917.1.S1_at	101244260	LOC101244260	uncharacterized LOC101244260	XR_183316	---													0.027278	0.490653	-2.0381
Les.2918.3.A1_at	101247918	LOC101247918	aspartate--tRNA ligase, cytoplasmic-like	XM_004239605	Solyc05g056250.2.1																0.00151199	2.04509	2.04509				0.00128314	2.00143	2.00143	F:GO:0000166; F:GO:0003676; F:GO:0005524; P:GO:0006418; F:GO:0004812; C:GO:0005737; F:GO:0004815; P:GO:0006531; P:GO:0006422; P:GO:0006522	F:nucleotide binding; F:nucleic acid binding; F:ATP binding; P:tRNA aminoacylation for protein translation; F:aminoacyl-tRNA ligase activity; C:cytoplasm; F:aspartate-tRNA ligase activity; P:aspartate metabolic process; P:aspartyl-tRNA aminoacylation; P:alanine metabolic process	EC:6.1.1.12	Aspartate--tRNA ligase
Les.292.1.S1_at	101251606	LOC101251606	uncharacterized LOC101251606	XM_004245452 /// XM_004245453	Solyc08g082610.2.1							0.00279757	2.83939	2.83939							0.000157897	4.40198	4.40198	0.000351458	3.62015	3.62015	1.87501e-05	5.38706	5.38706
Les.2920.2.S1_a_at	101268350	LOC101268350	elongation factor 1-beta 1-like	XM_004251197	Solyc11g072190.1.1																0.0266462	0.26922	-3.71443							P:GO:0006448; F:GO:0003746; C:GO:0005840; C:GO:0005853	P:regulation of translational elongation; F:translation elongation factor activity; C:ribosome; C:eukaryotic translation elongation factor 1 complex
Les.2921.1.S1_at	101254368	LOC101254368	zinc finger protein CONSTANS-LIKE 4-like	XM_004253005	Solyc12g096500.1.1																0.000562945	0.470911	-2.12354	6.14799e-05	2.37081	2.37081				C:GO:0005634; F:GO:0008270; P:GO:0009909; P:GO:0009416	C:nucleus; F:zinc ion binding; P:regulation of flower development; P:response to light stimulus
Les.2922.1.S1_at	101252940	LOC101252940	geraniol 8-hydroxylase-like	XM_004232012	Solyc02g090340.2.1																			0.000185773	6.65061	6.65061				F:GO:0005506; P:GO:0044550; C:GO:0016021; F:GO:0016709; P:GO:0055114; F:GO:0020037	F:iron ion binding; P:secondary metabolite biosynthetic process; C:integral component of membrane; F:oxidoreductase activity, acting on paired donors, with incorporation or reduction of molecular oxygen, NAD(P)H as one donor, and incorporation of one atom of oxygen; P:oxidation-reduction process; F:heme binding	EC:1.14.13	Acting on paired donors, with incorporation or reduction of molecular oxygen. The oxygen incorporated need not be derived from O(2)
Les.2922.2.A1_at	101252644	LOC101252644	geraniol 8-hydroxylase-like	XM_004232011	Solyc02g090350.2.1																			0.00117065	9.49065	9.49065	0.0202607	4.65343	4.65343	F:GO:0005506; P:GO:0044550; C:GO:0016021; F:GO:0016709; P:GO:0055114; F:GO:0020037	F:iron ion binding; P:secondary metabolite biosynthetic process; C:integral component of membrane; F:oxidoreductase activity, acting on paired donors, with incorporation or reduction of molecular oxygen, NAD(P)H as one donor, and incorporation of one atom of oxygen; P:oxidation-reduction process; F:heme binding	EC:1.14.13	Acting on paired donors, with incorporation or reduction of molecular oxygen. The oxygen incorporated need not be derived from O(2)
Les.2923.1.S1_at	101249056	LOC101249056	glucan endo-1,3-beta-glucosidase 11-like	XM_004252567	Solyc12g055840.1.1																0.0110265	0.21823	-4.58231				0.000356772	0.110741	-9.03007	P:GO:0007154; C:GO:0009505; F:GO:0042973; P:GO:0005982; P:GO:0005985; C:GO:0046658; F:GO:0030247	P:cell communication; C:plant-type cell wall; F:glucan endo-1,3-beta-D-glucosidase activity; P:starch metabolic process; P:sucrose metabolic process; C:anchored component of plasma membrane; F:polysaccharide binding	EC:3.2.1.21; EC:3.2.1.39	Beta-glucosidase; Glucan endo-1,3-beta-D-glucosidase
Les.2924.1.S1_at	101255435	LOC101255435	magnesium-chelatase subunit ChlI, chloroplastic-like	XM_004248091 /// XM_004248092	Solyc10g008740.2.1																						5.38199e-07	0.259537	-3.85301	P:GO:0015995; F:GO:0005524; P:GO:0015979; C:GO:0010007; F:GO:0016851	P:chlorophyll biosynthetic process; F:ATP binding; P:photosynthesis; C:magnesium chelatase complex; F:magnesium chelatase activity	EC:6.6.1.1	Magnesium chelatase
Les.293.1.S1_at	543815	LOC543815	uncharacterized LOC543815	NM_001247159	Solyc01g081310.2.1																0.0126941	10.0231	10.0231	0.00198425	16.2446	16.2446	0.000100916	45.925	45.925	P:GO:0006803; P:GO:0009407; C:GO:0005737; P:GO:0006749; F:GO:0004364	P:obsolete glutathione conjugation reaction; P:toxin catabolic process; C:cytoplasm; P:glutathione metabolic process; F:glutathione transferase activity	EC:2.5.1.18	Glutathione transferase
Les.2930.2.S1_at	101259966	LOC101259966	omega-6 fatty acid desaturase, endoplasmic reticulum isozyme 2-like	XM_004228617 /// XM_004228618 /// XM_004228619 /// XM_004228620 /// XM_004228621 /// XM	Solyc01g006430.2.1																0.00360645	0.276573	-3.61569							F:GO:0016717; P:GO:0006629; C:GO:0016021; P:GO:0055114	F:oxidoreductase activity, acting on paired donors, with oxidation of a pair of donors resulting in the reduction of molecular oxygen to two molecules of water; P:lipid metabolic process; C:integral component of membrane; P:oxidation-reduction process	EC:1.14.19	Acting on paired donors, with incorporation or reduction of molecular oxygen. The oxygen incorporated need not be derived from O(2)
Les.2936.2.S1_at	101265051	LOC101265051	ubiquitin-conjugating enzyme E2 10-like	XM_004245495	Solyc08g081950.2.1																0.00765553	0.403025	-2.48124							F:GO:0005524	F:ATP binding
Les.2938.3.A1_at	101263823	LOC101263823	uncharacterized LOC101263823	XM_004241820	Solyc06g063240.2.1																						0.00503466	2.32107	2.32107
Les.2940.2.S1_s_at	101258105	LOC101258105	polyadenylate-binding protein 2-like	XM_004230710	Solyc01g107870.2.1																0.0344637	2.26352	2.26352							F:GO:0003676; F:GO:0003723; C:GO:0005737	F:nucleic acid binding; F:RNA binding; C:cytoplasm
Les.2941.3.A1_at	101249556	LOC101249556	autophagy-related protein 3-like	XM_004240713	Solyc06g034160.2.1																0.00547631	3.05231	3.05231				0.000796543	3.82005	3.82005	P:GO:0000045; C:GO:0000153; P:GO:0044804; C:GO:0005737; P:GO:0006914; P:GO:0015031; C:GO:0005829; P:GO:0006810; P:GO:0000422; F:GO:0019776	P:autophagosome assembly; C:cytoplasmic ubiquitin ligase complex; P:nucleophagy; C:cytoplasm; P:autophagy; P:protein transport; C:cytosol; P:transport; P:mitophagy; F:Atg8 ligase activity
Les.2942.2.S1_at	101259256	LOC101259256	elongation factor TuA, chloroplastic-like	XM_004241467	Solyc06g071790.2.1																0.0365008	0.498386	-2.00648	0.00842808	0.428953	-2.33126	0.000505099	0.297482	-3.36155	F:GO:0005525; C:GO:0009507; P:GO:0006448; F:GO:0003746; F:GO:0003924; C:GO:0005739; P:GO:0070125; C:GO:0005840	F:GTP binding; C:chloroplast; P:regulation of translational elongation; F:translation elongation factor activity; F:GTPase activity; C:mitochondrion; P:mitochondrial translational elongation; C:ribosome	EC:3.6.1.15	Nucleoside-triphosphate phosphatase
Les.2944.3.S1_at	101262728	LOC101262728	tubulin beta-1 chain-like	XM_004241138	Solyc06g076640.2.1																0.00527956	0.0818005	-12.2249				0.0267914	0.160876	-6.21596	F:GO:0005525; C:GO:0005737; F:GO:0003924; F:GO:0005200; C:GO:0005874; P:GO:0007017	F:GTP binding; C:cytoplasm; F:GTPase activity; F:structural constituent of cytoskeleton; C:microtubule; P:microtubule-based process	EC:3.6.1.15	Nucleoside-triphosphate phosphatase
Les.2945.2.S1_at	101250918	LOC101250918	valine--tRNA ligase-like	XM_004246623	Solyc09g007540.2.1										0.044169	0.390369	-2.56168										0.0411844	0.37811	-2.64473	F:GO:0004832; P:GO:0009097; F:GO:0005524; P:GO:0006438; P:GO:0006450; P:GO:0009099; P:GO:0009098; F:GO:0002161; C:GO:0005829	F:valine-tRNA ligase activity; P:isoleucine biosynthetic process; F:ATP binding; P:valyl-tRNA aminoacylation; P:regulation of translational fidelity; P:valine biosynthetic process; P:leucine biosynthetic process; F:aminoacyl-tRNA editing activity; C:cytosol	EC:6.1.1.9; EC:3.1.1.1	Valine--tRNA ligase; Carboxylesterase
Les.2947.1.S1_at	101246410	LOC101246410	UPF0047 protein YjbQ-like	XM_004253064	Solyc12g095770.1.1																0.00182994	0.198462	-5.03875				0.0379176	0.382903	-2.61163	C:GO:0009507	C:chloroplast
Les.2954.1.S1_at	101246142	LOC101246142	dynamin-related protein 5A-like	XM_004240020	Solyc05g050600.2.1																0.0472268	0.493934	-2.02456							F:GO:0005525; F:GO:0003924	F:GTP binding; F:GTPase activity	EC:3.6.1.15	Nucleoside-triphosphate phosphatase
Les.2955.1.A1_at	101256346	LOC101256346	glutathionyl-hydroquinone reductase YqjG-like	XM_004233187	Solyc02g068900.2.1																8.30669e-05	4.82624	4.82624	0.0320516	2.01439	2.01439	0.000708609	3.40388	3.40388	P:GO:0006803; C:GO:0005737; P:GO:0006749; F:GO:0004364	P:obsolete glutathione conjugation reaction; C:cytoplasm; P:glutathione metabolic process; F:glutathione transferase activity	EC:2.5.1.18	Glutathione transferase
Les.2957.2.S1_at	101245513	LOC101245513	uncharacterized LOC101245513	XM_004249604 /// XM_004249605 /// XM_004249606 /// XM_004249607	Solyc10g086560.1.1																0.0139187	0.204105	-4.89944				0.00398471	0.161975	-6.17379
Les.2959.1.S1_at	101245299	LOC101245299	transketolase, chloroplastic-like	XM_004248512	Solyc10g018300.1.1																						4.43977e-05	0.345175	-2.89708	F:GO:0004802; F:GO:0046872; P:GO:0006098; P:GO:0019253; P:GO:0015976; C:GO:0009535	F:transketolase activity; F:metal ion binding; P:pentose-phosphate shunt; P:reductive pentose-phosphate cycle; P:carbon utilization; C:chloroplast thylakoid membrane	EC:2.2.1.1	Transketolase
Les.2961.1.S1_at	101265896	PK5	protein kinase PINOID 2	NM_001321273	Solyc12g006690.1.1							0.00511813	0.304798	-3.28086							0.0264277	0.384698	-2.59944	0.0209573	0.393022	-2.54439	0.00164463	0.253955	-3.93771	F:GO:0005524; F:GO:0004672; P:GO:0006468; C:GO:0044424; P:GO:0048825	F:ATP binding; F:protein kinase activity; P:protein phosphorylation; C:intracellular part; P:cotyledon development
Les.2964.3.A1_at	101261198	LOC101261198	protodermal factor 1	XM_004251766	---																			0.0208911	0.230394	-4.3404
Les.2971.2.A1_at	101246961	LOC101246961	wound-induced proteinase inhibitor 1-like	XM_004247606	Solyc09g083440.2.1																0.0387314	2.62762	2.62762	0.014107	2.99205	2.99205				F:GO:0004867; P:GO:0009611; P:GO:0010951	F:serine-type endopeptidase inhibitor activity; P:response to wounding; P:negative regulation of endopeptidase activity
Les.2973.1.S1_at	544275	LOC544275	glutamine synthetase	XM_004250146	Solyc11g011380.1.1																						0.00124974	2.37807	2.37807	F:GO:0005524; C:GO:0005737; P:GO:0009252; P:GO:0006542; P:GO:0009399; F:GO:0004356	F:ATP binding; C:cytoplasm; P:peptidoglycan biosynthetic process; P:glutamine biosynthetic process; P:nitrogen fixation; F:glutamate-ammonia ligase activity	EC:6.3.1.2	Glutamate--ammonia ligase
Les.2974.2.S1_at	101254699	LOC101254699	40S ribosomal protein S15-like	XM_004240981	Solyc06g053820.2.1																						0.0288149	0.466635	-2.143	F:GO:0003723; F:GO:0003735; C:GO:0022627; P:GO:0000028; P:GO:0006412	F:RNA binding; F:structural constituent of ribosome; C:cytosolic small ribosomal subunit; P:ribosomal small subunit assembly; P:translation
Les.2977.3.A1_at	101248442	LOC101248442	uncharacterized protein At5g39570	XM_004232158	Solyc02g088260.2.1																						0.00257713	2.14579	2.14579
Les.2981.1.A1_at	101264522	LOC101264522	dolichyl-phosphate beta-glucosyltransferase-like	XM_004239743	Solyc05g054460.2.1																0.0117288	2.02417	2.02417				0.00851226	2.02527	2.02527	C:GO:0005789; C:GO:0016020; C:GO:0016021; P:GO:0006487; C:GO:0005783; F:GO:0016740	C:endoplasmic reticulum membrane; C:membrane; C:integral component of membrane; P:protein N-linked glycosylation; C:endoplasmic reticulum; F:transferase activity
Les.2982.1.A1_at	101257670	LOC101257670	pre-mRNA-splicing factor SF2-like	XM_004240493	Solyc06g009060.2.1																0.00213765	0.297176	-3.36501				0.00773248	0.377675	-2.64778	F:GO:0003676; F:GO:0003723	F:nucleic acid binding; F:RNA binding
Les.2986.1.S1_at	101248140	LOC101248140	uncharacterized LOC101248140	XM_004229920 /// XM_004229921	Solyc01g095430.2.1																0.0106888	0.478631	-2.08929	0.00687144	0.478607	-2.0894	1.52288e-05	0.249771	-4.00366	C:GO:0009941; C:GO:0016021; C:GO:0010287; C:GO:0009535	C:chloroplast envelope; C:integral component of membrane; C:plastoglobule; C:chloroplast thylakoid membrane
Les.2989.1.S1_at	101250163	LOC101250163	histone H2A.1-like	XM_004230179	Solyc01g099410.2.1																			0.0404669	0.386291	-2.58872	0.0181801	0.321577	-3.10967	F:GO:0003677; C:GO:0000790; F:GO:0046982; P:GO:0006342; C:GO:0000786	F:DNA binding; C:nuclear chromatin; F:protein heterodimerization activity; P:chromatin silencing; C:nucleosome
Les.2991.1.A1_at	101264034	LOC101264034	actin-related protein 8-like	XM_004243954	Solyc07g066120.2.1																			0.00638726	2.11402	2.11402	0.001657	2.4739	2.4739
Les.2993.2.S1_at	101266731	LOC101266731	pyruvate dehydrogenase E1 component subunit beta, mitochondrial-like	XM_004241408	Solyc06g072580.2.1																						0.0199309	0.208955	-4.78571	P:GO:0009097; P:GO:0006094; P:GO:0006086; C:GO:0045254; F:GO:0004739; P:GO:0009099; P:GO:0006096; P:GO:0009098; P:GO:0055114	P:isoleucine biosynthetic process; P:gluconeogenesis; P:acetyl-CoA biosynthetic process from pyruvate; C:pyruvate dehydrogenase complex; F:pyruvate dehydrogenase (acetyl-transferring) activity; P:valine biosynthetic process; P:glycolytic process; P:leucine biosynthetic process; P:oxidation-reduction process	EC:1.2.4.1	Pyruvate dehydrogenase (acetyl-transferring)
Les.2998.3.S1_at	101246382	LOC101246382	dnaJ homolog subfamily C member 2-like	XM_004229999	Solyc01g096700.2.1																0.00699612	0.267831	-3.7337				0.0292712	0.374137	-2.67282	C:GO:0005634; F:GO:0003677	C:nucleus; F:DNA binding
Les.300.2.S1_at	101245514	LOC101245514	uncharacterized LOC101245514	XM_004231903	Solyc02g092000.2.1																0.0209703	0.379423	-2.63558							C:GO:0016021	C:integral component of membrane
Les.3006.2.S1_at	101266002	LOC101266002	rhodanese-like domain-containing protein 9, chloroplastic-like	XM_004234713	Solyc03g053110.2.1																0.00893353	0.212528	-4.70526				0.000311029	0.111301	-8.98465	C:GO:0016021; C:GO:0009535	C:integral component of membrane; C:chloroplast thylakoid membrane
Les.3007.1.S1_at	101248220	LOC101248220	50S ribosomal protein L13, chloroplastic-like	XM_004244243	Solyc07g062190.2.1										0.00053116	0.44667	-2.23879				0.0061414	0.148223	-6.74658	0.0173791	0.219669	-4.5523	0.000187473	0.068186	-14.6658	F:GO:0003735; C:GO:0016020; F:GO:0003729; P:GO:0042254; C:GO:0022625; P:GO:0006412	F:structural constituent of ribosome; C:membrane; F:mRNA binding; P:ribosome biogenesis; C:cytosolic large ribosomal subunit; P:translation
Les.3009.2.S1_at	101265996	LOC101265996	histone H2A-like	XM_004251272	Solyc11g073250.1.1																			0.0115375	0.407986	-2.45106	0.00786726	0.379849	-2.63263	F:GO:0003677; C:GO:0000790; F:GO:0046982; P:GO:0006342; C:GO:0000786	F:DNA binding; C:nuclear chromatin; F:protein heterodimerization activity; P:chromatin silencing; C:nucleosome
Les.3011.1.S1_at	543647	POR2	light dependent NADH:protochlorophyllide oxidoreductase 2	XM_004243292	Solyc07g054210.2.1																5.92226e-05	0.41427	-2.41389				9.91536e-08	0.268918	-3.71861	P:GO:0015995; P:GO:0006118; C:GO:0009941; F:GO:0003959; P:GO:0019685; P:GO:0055114; F:GO:0016630; C:GO:0009535	P:chlorophyll biosynthetic process; P:obsolete electron transport; C:chloroplast envelope; F:NADPH dehydrogenase activity; P:photosynthesis, dark reaction; P:oxidation-reduction process; F:protochlorophyllide reductase activity; C:chloroplast thylakoid membrane	EC:1.6.99.1; EC:1.3.1.33	NADPH dehydrogenase; Protochlorophyllide reductase
Les.3012.1.S1_at	101250816	LOC101250816	V-type proton ATPase subunit H-like	XM_004242571	Solyc07g005940.2.1																0.0260518	0.212381	-4.70853							C:GO:0000221; C:GO:0009507; P:GO:0006119; P:GO:0015991; C:GO:0005794; F:GO:0046961; C:GO:0000325; C:GO:0005886; F:GO:0020037	C:vacuolar proton-transporting V-type ATPase, V1 domain; C:chloroplast; P:oxidative phosphorylation; P:ATP hydrolysis coupled proton transport; C:Golgi apparatus; F:proton-transporting ATPase activity, rotational mechanism; C:plant-type vacuole; C:plasma membrane; F:heme binding	EC:3.6.1.3; EC:3.6.1.15	Adenosinetriphosphatase; Nucleoside-triphosphate phosphatase
Les.3014.1.S1_at	544259	FESOD	iron superoxide dismutase	NM_001246860	Solyc06g048410.2.1																0.00103219	2.36118	2.36118	3.38353e-05	3.01111	3.01111				C:GO:0009507; F:GO:0046872; P:GO:0019430; P:GO:0055114; F:GO:0004784	C:chloroplast; F:metal ion binding; P:removal of superoxide radicals; P:oxidation-reduction process; F:superoxide dismutase activity	EC:1.15.1.1	Superoxide dismutase
Les.3016.1.S1_at	101268123	LOC101268123	chlorophyll a-b binding protein 13, chloroplastic-like	XM_004244139	Solyc07g063600.2.1							0.00168564	0.279084	-3.58315							0.00130515	0.251482	-3.97642	0.0407487	0.466578	-2.14327	2.07962e-05	0.14629	-6.83573	F:GO:0046872; F:GO:0031409; C:GO:0009941; C:GO:0016021; F:GO:0005198; C:GO:0009522; P:GO:0018298; F:GO:0016168; C:GO:0010287; P:GO:0009416; P:GO:0009768; C:GO:0009535	F:metal ion binding; F:pigment binding; C:chloroplast envelope; C:integral component of membrane; F:structural molecule activity; C:photosystem I; P:protein-chromophore linkage; F:chlorophyll binding; C:plastoglobule; P:response to light stimulus; P:photosynthesis, light harvesting in photosystem I; C:chloroplast thylakoid membrane
Les.3017.2.S1_at	101245626	LOC101245626	aquaporin TIP2-1-like	NM_001302916	Solyc12g044330.1.1																0.0143928	0.074398	-13.4412	0.0259798	0.112603	-8.88073	0.00158233	0.0349662	-28.599	C:GO:0016021; P:GO:0006810; F:GO:0005215	C:integral component of membrane; P:transport; F:transporter activity
Les.3017.3.S1_at	101260139	LOC101260139	HMG-Y-related protein A-like	XM_004239983	Solyc05g051290.2.1																0.00154658	0.0666938	-14.9939	0.000602252	0.0604849	-16.5331	0.00218129	0.0841213	-11.8876	C:GO:0005634; F:GO:0003677; P:GO:0006355; C:GO:0000786; P:GO:0006334	C:nucleus; F:DNA binding; P:regulation of transcription, DNA-templated; C:nucleosome; P:nucleosome assembly
Les.3018.1.S1_at	101253940	LOC101253940	bifunctional L-3-cyanoalanine synthase/cysteine synthase 1, mitochondrial-like	XM_004248001	Solyc10g012370.2.1																0.0069686	2.15439	2.15439							F:GO:0030170; C:GO:0005739; P:GO:0019499; C:GO:0009333; F:GO:0004124; F:GO:0016740; F:GO:0050017; P:GO:0006535	F:pyridoxal phosphate binding; C:mitochondrion; P:cyanide metabolic process; C:cysteine synthase complex; F:cysteine synthase activity; F:transferase activity; F:L-3-cyanoalanine synthase activity; P:cysteine biosynthetic process from serine	EC:4.4.1.9; EC:2.5.1.47	L-3-cyanoalanine synthase; Cysteine synthase
Les.3019.2.S1_at	101257739	LOC101257739	short-chain dehydrogenase TIC 32, chloroplastic-like	XM_004234368 /// XM_004234369	Solyc03g025390.2.1	0.00918464	4.04379	4.04379				0.00870226	0.277399	-3.60492				0.0186573	3.03861	3.03861										F:GO:0016491; P:GO:0055114	F:oxidoreductase activity; P:oxidation-reduction process
Les.3024.2.S1_at	101263911	LOC101263911	very-long-chain enoyl-CoA reductase	XM_010323077	Solyc05g054490.2.1																0.028622	0.170324	-5.87115				0.0405176	0.2089	-4.78699	C:GO:0005737; F:GO:0019166; P:GO:0006629; C:GO:0016021; P:GO:0055114	C:cytoplasm; F:trans-2-enoyl-CoA reductase (NADPH) activity; P:lipid metabolic process; C:integral component of membrane; P:oxidation-reduction process	EC:1.3.1.38	Trans-2-enoyl-CoA reductase (NADPH)
Les.3026.2.S1_at	101267211	LOC101267211	DNA (cytosine-5)-methyltransferase 3-like	XM_004252792	Solyc12g100330.1.1																			0.0443755	0.310247	-3.22324	0.00104637	0.12152	-8.22908	C:GO:0005634; F:GO:0003886; P:GO:0090116; F:GO:0003682; C:GO:0000785; P:GO:0006555	C:nucleus; F:DNA (cytosine-5-)-methyltransferase activity; P:C-5 methylation of cytosine; F:chromatin binding; C:chromatin; P:methionine metabolic process	EC:2.1.1.37	DNA (cytosine-5-)-methyltransferase
Les.3029.1.S1_at	544299	PSBO	33kDa precursor protein of oxygen-evolving complex	XM_004233367	Solyc02g065400.2.1																						0.000109958	0.406316	-2.46114	P:GO:0042549; F:GO:0005509; C:GO:0016021; C:GO:0009654; P:GO:0015979; C:GO:0019898; C:GO:0009535	P:photosystem II stabilization; F:calcium ion binding; C:integral component of membrane; C:photosystem II oxygen evolving complex; P:photosynthesis; C:extrinsic component of membrane; C:chloroplast thylakoid membrane
Les.3030.1.A1_at	101246304	LOC101246304	uncharacterized LOC101246304	XM_004232557	Solyc02g082120.2.1																			2.36337e-06	0.134331	-7.44428	0.00493456	0.363801	-2.74876	P:GO:0006281; F:GO:0008725; P:GO:0006284; F:GO:0003824	P:DNA repair; F:DNA-3-methyladenine glycosylase activity; P:base-excision repair; F:catalytic activity	EC:3.2.2.21; EC:3.2.2.20	DNA-3-methyladenine glycosylase II; DNA-3-methyladenine glycosylase I
Les.3031.2.S1_at	101244132	LOC101244132	V-type proton ATPase subunit B2-like	XM_004248595	Solyc10g055670.1.1																0.0376111	0.352678	-2.83545							F:GO:0005524; P:GO:0015991; P:GO:0046034; C:GO:0033180; F:GO:0016820	F:ATP binding; P:ATP hydrolysis coupled proton transport; P:ATP metabolic process; C:proton-transporting V-type ATPase, V1 domain; F:hydrolase activity, acting on acid anhydrides, catalyzing transmembrane movement of substances
Les.3033.1.A1_at	101267617	LOC101267617	26S proteasome regulatory subunit 4 homolog A-like	XM_004242335	Solyc06g083620.2.1																0.00128963	2.35209	2.35209				0.00109491	2.29138	2.29138	C:GO:0008540; P:GO:0030163; P:GO:1901800; P:GO:0045899; F:GO:0000166; F:GO:0005524; C:GO:0005737; C:GO:0031597; F:GO:0017025; C:GO:0031595; P:GO:0030433; F:GO:0036402; F:GO:0016787	C:proteasome regulatory particle, base subcomplex; P:protein catabolic process; P:positive regulation of proteasomal protein catabolic process; P:positive regulation of RNA polymerase II transcriptional preinitiation complex assembly; F:nucleotide binding; F:ATP binding; C:cytoplasm; C:cytosolic proteasome complex; F:TBP-class protein binding; C:nuclear proteasome complex; P:ER-associated ubiquit…	EC:3.6.1.3; EC:3.6.1.15	Adenosinetriphosphatase; Nucleoside-triphosphate phosphatase
Les.3034.1.S1_at	101255652	LOC101255652	wound-induced proteinase inhibitor 2-like	XM_004250378	Solyc11g020960.1.1				0.0112576	0.159876	-6.25484	0.000707301	0.0835602	-11.9674	0.0417263	0.261724	-3.82082							6.25772e-05	0.0471028	-21.2302	7.78568e-05	0.0472292	-21.1733	F:GO:0004867; P:GO:0010951	F:serine-type endopeptidase inhibitor activity; P:negative regulation of endopeptidase activity
Les.3038.1.S1_at	101262260	LOC101262260	thylakoid membrane phosphoprotein 14 kDa, chloroplastic-like	XM_004248370	Solyc10g005050.2.1																0.00396799	0.257968	-3.87645	0.00995038	0.329128	-3.03833	4.77443e-06	0.0898996	-11.1235	C:GO:0009508; C:GO:0030093; P:GO:0009737; C:GO:0009941; C:GO:0016021; P:GO:0009773	C:plastid chromosome; C:chloroplast photosystem I; P:response to abscisic acid; C:chloroplast envelope; C:integral component of membrane; P:photosynthetic electron transport in photosystem I
Les.3039.1.S1_at	544153	LOC544153	phospho-2-dehydro-3-deoxyheptonate aldolase	NM_001247489	Solyc04g074480.2.1							0.00255212	2.00908	2.00908							1.44635e-05	3.2959	3.2959				2.53007e-05	2.96661	2.96661	C:GO:0009507; P:GO:0009094; P:GO:0000162; P:GO:0006571; F:GO:0003849; P:GO:0009423	C:chloroplast; P:L-phenylalanine biosynthetic process; P:tryptophan biosynthetic process; P:tyrosine biosynthetic process; F:3-deoxy-7-phosphoheptulonate synthase activity; P:chorismate biosynthetic process	EC:2.5.1.54	3-deoxy-7-phosphoheptulonate synthase
Les.3040.2.A1_at	101253730	LOC101253730	12S seed storage protein CRD	XM_004230444	---																			0.0193857	2.22859	2.22859	0.0350622	2.0672	2.0672
Les.3042.2.S1_at	101247612	LOC101247612	ZF-HD homeobox protein At4g24660-like	XM_004237923	Solyc04g074990.2.1							0.0391211	0.484379	-2.0645							0.0303159	0.447683	-2.23373	0.000111062	0.217869	-4.58991	0.0220644	0.443088	-2.25689	F:GO:0003677	F:DNA binding
Les.3045.1.S1_at	544267	LOC544267	adenylyl-sulfate reductase	NM_001246900	Solyc02g080640.2.1	0.030425	0.483134	-2.06982													0.00542943	2.5272	2.5272	2.59747e-08	10.6191	10.6191	0.0204143	2.04469	2.04469	C:GO:0005623; P:GO:0019419; F:GO:0016671; P:GO:0045454	C:cell; P:sulfate reduction; F:oxidoreductase activity, acting on a sulfur group of donors, disulfide as acceptor; P:cell redox homeostasis
Les.3047.1.S1_at	543724	exp18	expansin18	NM_001247832	Solyc06g076220.2.1																			0.000486318	0.414246	-2.41403				C:GO:0005618; C:GO:0016020; P:GO:0009664; C:GO:0005576	C:cell wall; C:membrane; P:plant-type cell wall organization; C:extracellular region
Les.3048.2.S1_at	100301932	UBC3	ubiquitin conjugating enzyme	NM_001247318	Solyc06g082600.2.1																0.0222459	0.471928	-2.11897				0.0259961	0.499633	-2.00147	F:GO:0005524; F:GO:0016740; F:GO:0016874; P:GO:0016567	F:ATP binding; F:transferase activity; F:ligase activity; P:protein ubiquitination
Les.3049.3.S1_at	101262100	LOC101262100	uncharacterized LOC101262100	XM_004236703	Solyc04g011460.1.1																0.00842117	0.247945	-4.03315							C:GO:0009941	C:chloroplast envelope
Les.305.2.S1_at	101246148	AGO4B	Argonaute 4B	XM_004241340	Solyc06g073540.2.1										0.0428444	0.184998	-5.40546				0.00146721	0.149484	-6.68967				0.0015859	0.166423	-6.00878	F:GO:0003676	F:nucleic acid binding
Les.3052.3.A1_at	101262221	LOC101262221	nucleoside diphosphate kinase 2, chloroplastic-like	XM_004241476	Solyc06g071960.2.1																			0.00865103	0.470859	-2.12378	0.0012784	0.374728	-2.6686	P:GO:0006241; P:GO:0006183; P:GO:0006165; F:GO:0004550; P:GO:0006144; C:GO:0005622; F:GO:0000166; F:GO:0005524; P:GO:0006228; P:GO:0006206; P:GO:0016310; F:GO:0016740; F:GO:0016301	P:CTP biosynthetic process; P:GTP biosynthetic process; P:nucleoside diphosphate phosphorylation; F:nucleoside diphosphate kinase activity; P:purine nucleobase metabolic process; C:intracellular; F:nucleotide binding; F:ATP binding; P:UTP biosynthetic process; P:pyrimidine nucleobase metabolic process; P:phosphorylation; F:transferase activity; F:kinase activity	EC:2.7.4.6	Nucleoside-diphosphate kinase
Les.3053.2.A1_at	101265686	LOC101265686	thioredoxin-like protein 4A-like	XM_004231453	Solyc02g014870.2.1																0.000110669	2.17092	2.17092				1.0972e-05	2.43232	2.43232	C:GO:0046540; C:GO:0005682; C:GO:0005681; P:GO:0000245; P:GO:0000398	C:U4/U6 x U5 tri-snRNP complex; C:U5 snRNP; C:spliceosomal complex; P:spliceosomal complex assembly; P:mRNA splicing, via spliceosome
Les.3054.1.S1_at	101243766	LOC101243766	chlorophyll a-b binding protein 13, chloroplastic-like	XM_004251789	Solyc12g011450.1.1							0.00690001	0.353707	-2.8272							0.000322454	0.210318	-4.75471				0.000135576	0.200298	-4.99255	F:GO:0046872; F:GO:0031409; C:GO:0009523; C:GO:0009941; C:GO:0016021; C:GO:0009522; P:GO:0018298; F:GO:0016168; C:GO:0010287; P:GO:0009416; P:GO:0009768; C:GO:0009535	F:metal ion binding; F:pigment binding; C:photosystem II; C:chloroplast envelope; C:integral component of membrane; C:photosystem I; P:protein-chromophore linkage; F:chlorophyll binding; C:plastoglobule; P:response to light stimulus; P:photosynthesis, light harvesting in photosystem I; C:chloroplast thylakoid membrane
Les.3058.1.A1_at	101261110	LOC101261110	DNA excision repair protein ERCC-1-like	XM_004235941	Solyc03g115580.2.1																0.0346541	2.65423	2.65423							P:GO:0006281; F:GO:0017108; P:GO:0070914; P:GO:0006296; P:GO:0006294; P:GO:0000724; P:GO:0000710; F:GO:0003684; P:GO:0006312; F:GO:0000014; F:GO:0003697; C:GO:0005634; C:GO:0000110; P:GO:0006308; F:GO:0004519; C:GO:0070522; P:GO:0010332; P:GO:0010213; P:GO:0010224	P:DNA repair; F:5'-flap endonuclease activity; P:UV-damage excision repair; P:nucleotide-excision repair, DNA incision, 5'-to lesion; P:nucleotide-excision repair, preincision complex assembly; P:double-strand break repair via homologous recombination; P:meiotic mismatch repair; F:damaged DNA binding; P:mitotic recombination; F:single-stranded DNA endodeoxyribonuclease activity; F:single-stranded…	EC:3.1.30; EC:3.1.21; EC:3.1	Acting on ester bonds; Acting on ester bonds; Acting on ester bonds
Les.3062.1.S1_at	101249002	LOC101249002	chlorophyll a-b binding protein CP29.2, chloroplastic-like	XM_004246277	Solyc09g014520.2.1																						7.59969e-07	0.207459	-4.82024	F:GO:0046872; F:GO:0031409; C:GO:0009941; C:GO:0016021; C:GO:0009522; P:GO:0018298; F:GO:0016168; C:GO:0010287; P:GO:0009416; P:GO:0009768; C:GO:0009535	F:metal ion binding; F:pigment binding; C:chloroplast envelope; C:integral component of membrane; C:photosystem I; P:protein-chromophore linkage; F:chlorophyll binding; C:plastoglobule; P:response to light stimulus; P:photosynthesis, light harvesting in photosystem I; C:chloroplast thylakoid membrane
Les.3063.1.S1_at	101258049	LOC101258049	photosystem II 5 kDa protein, chloroplastic-like	XM_004252847	Solyc12g099650.1.1																						3.45105e-05	0.379891	-2.63233	C:GO:0009523; P:GO:0015979; C:GO:0009535	C:photosystem II; P:photosynthesis; C:chloroplast thylakoid membrane
Les.3064.1.S1_at	544283	AGP-S1	ADP-glucose pyrophosphorylase large subunit	NM_001246989	Solyc01g109790.2.1																			0.00848672	3.33043	3.33043				F:GO:0005524; C:GO:0009507; P:GO:0005978; C:GO:0010170; P:GO:0019252; C:GO:0009501; F:GO:0008878; P:GO:0005985	F:ATP binding; C:chloroplast; P:glycogen biosynthetic process; C:glucose-1-phosphate adenylyltransferase complex; P:starch biosynthetic process; C:amyloplast; F:glucose-1-phosphate adenylyltransferase activity; P:sucrose metabolic process	EC:2.7.7.27	Glucose-1-phosphate adenylyltransferase
Les.3065.1.S1_at	101246669	LOC101246669	squamosa promoter-binding protein 1-like	XM_004248060	Solyc10g009080.2.1																0.00206841	0.116165	-8.60844	0.00748264	0.182871	-5.46833	5.03349e-05	0.0525349	-19.035	C:GO:0005634; F:GO:0003677; C:GO:0005667; F:GO:0003700; F:GO:0046872; P:GO:0009908; P:GO:0006355; P:GO:0006355	C:nucleus; F:DNA binding; C:transcription factor complex; F:transcription factor activity, sequence-specific DNA binding; F:metal ion binding; P:flower development; P:regulation of transcription, DNA-templated; P:regulation of transcription, DNA-templated
Les.3067.1.A1_at	101247506	SAM2	S-adenosylmethionine synthase 2-like	XM_004252896 /// XM_004252897	Solyc12g099000.1.1																0.0292687	0.158671	-6.30233	4.76108e-05	2.4226	2.4226	4.01367e-05	2.4921	2.4921	F:GO:0000166; F:GO:0005524; C:GO:0005737; F:GO:0046872; C:GO:0005829; F:GO:0016740; P:GO:0006556; P:GO:0006730; F:GO:0004478; P:GO:0006555	F:nucleotide binding; F:ATP binding; C:cytoplasm; F:metal ion binding; C:cytosol; F:transferase activity; P:S-adenosylmethionine biosynthetic process; P:one-carbon metabolic process; F:methionine adenosyltransferase activity; P:methionine metabolic process	EC:2.5.1.6	Methionine adenosyltransferase
Les.3068.1.S1_at	101267534	LOC101267534	uncharacterized LOC101267534	XM_004241578	Solyc06g069170.2.1																0.00424696	0.29481	-3.39202				0.0129626	0.373025	-2.68079	C:GO:0016021; C:GO:0009535	C:integral component of membrane; C:chloroplast thylakoid membrane
Les.3069.1.S1_at	101265691	LOC101265691	putative glycosyltransferase 7-like	XM_004231889	Solyc02g092215.1.1																			0.0033246	0.318935	-3.13544				F:GO:0016757; C:GO:0016021	F:transferase activity, transferring glycosyl groups; C:integral component of membrane
Les.3070.1.S1_at	101264133	LOC101264133	acid phosphatase 1-like	XM_004241905	Solyc06g062370.2.1							0.00233362	0.202565	-4.93668										0.000123838	0.120071	-8.32841	0.0105639	0.273375	-3.65798	P:GO:0019497; P:GO:0006771; P:GO:0016311; F:GO:0003993	P:hexachlorocyclohexane metabolic process; P:riboflavin metabolic process; P:dephosphorylation; F:acid phosphatase activity	EC:3.1.3.41; EC:3.1.3.2	4-nitrophenylphosphatase; Acid phosphatase
Les.3071.1.S1_at	101261722	LOC101261722	alpha-aminoadipic semialdehyde synthase-like	XM_004242854	Solyc07g017610.2.1																			6.08035e-05	3.2435	3.2435	2.54016e-06	4.58313	4.58313	P:GO:0009085; F:GO:0047130; C:GO:0016021; C:GO:0005829; P:GO:0055114; P:GO:0019477	P:lysine biosynthetic process; F:saccharopine dehydrogenase (NADP+, L-lysine-forming) activity; C:integral component of membrane; C:cytosol; P:oxidation-reduction process; P:L-lysine catabolic process	EC:1.5.1.8	Saccharopine dehydrogenase (NADP(+), L-lysine-forming)
Les.3072.3.S1_at	101253541	LOC101253541	glyceraldehyde-3-phosphate dehydrogenase A, chloroplastic-like	XM_004231475	Solyc02g020940.2.1																0.0394681	0.300888	-3.3235	0.00151891	0.156103	-6.40604	0.00817063	0.219112	-4.56387	P:GO:0006094; C:GO:0009507; F:GO:0050661; F:GO:0051287; C:GO:0005739; F:GO:0047100; P:GO:0006096; P:GO:0019253; P:GO:0055114; F:GO:0004365; P:GO:0015976	P:gluconeogenesis; C:chloroplast; F:NADP binding; F:NAD binding; C:mitochondrion; F:glyceraldehyde-3-phosphate dehydrogenase (NADP+) (phosphorylating) activity; P:glycolytic process; P:reductive pentose-phosphate cycle; P:oxidation-reduction process; F:glyceraldehyde-3-phosphate dehydrogenase (NAD+) (phosphorylating) activity; P:carbon utilization	EC:1.2.1.59; EC:1.2.1.13; EC:1.2.1.12	Glyceraldehyde-3-phosphate dehydrogenase (NAD(P)(+)) (phosphorylating); Glyceraldehyde-3-phosphate dehydrogenase (NADP(+)) (phosphorylating); Glyceraldehyde-3-phosphate dehydrogenase (phosphorylating)
Les.3073.1.S1_at	101260830	LOC101260830	photosystem II 22 kDa protein, chloroplastic-like	XM_004241979	Solyc06g060340.2.1																			0.000699914	0.338152	-2.95725	0.000441943	0.314657	-3.17806	C:GO:0009523; C:GO:0016021; P:GO:0015979; C:GO:0009535	C:photosystem II; C:integral component of membrane; P:photosynthesis; C:chloroplast thylakoid membrane
Les.3076.2.S1_at	101252594	LOC101252594	60S ribosomal protein L10a-1-like	XM_004241274	Solyc06g074300.2.1																0.0173589	2.22825	2.22825							F:GO:0003723; C:GO:0030529; P:GO:0000470; F:GO:0003735; C:GO:0015934; C:GO:0022625; C:GO:0005840; P:GO:0006412	F:RNA binding; C:intracellular ribonucleoprotein complex; P:maturation of LSU-rRNA; F:structural constituent of ribosome; C:large ribosomal subunit; C:cytosolic large ribosomal subunit; C:ribosome; P:translation
Les.3078.1.S1_at	101264109	LOC101264109	ribulose-phosphate 3-epimerase, chloroplastic-like	XM_004235950 /// XM_004235951	Solyc03g115820.2.1																						7.75148e-10	0.348353	-2.87065	F:GO:0046872; P:GO:0006098; P:GO:0019253; F:GO:0004750; P:GO:0015976; C:GO:0009535	F:metal ion binding; P:pentose-phosphate shunt; P:reductive pentose-phosphate cycle; F:ribulose-phosphate 3-epimerase activity; P:carbon utilization; C:chloroplast thylakoid membrane	EC:5.1.3.1	Ribulose-phosphate 3-epimerase
Les.3080.3.S1_at	101260518	LOC101260518	40S ribosomal protein S3a-like	XM_004235276	Solyc03g097900.2.1																0.0219844	0.319085	-3.13396				0.0225025	0.33868	-2.95264	F:GO:0003735; C:GO:0022627; P:GO:0042254; P:GO:0006412	F:structural constituent of ribosome; C:cytosolic small ribosomal subunit; P:ribosome biogenesis; P:translation
Les.3084.1.S1_at	101252312	LOC101252312	uncharacterized LOC101252312	XM_004245537	Solyc08g081310.2.1																4.22669e-05	0.382724	-2.61285							C:GO:0005667; F:GO:0003712; F:GO:0004407; P:GO:0006355; C:GO:0000118; P:GO:0016575; P:GO:0006355	C:transcription factor complex; F:transcription cofactor activity; F:histone deacetylase activity; P:regulation of transcription, DNA-templated; C:histone deacetylase complex; P:histone deacetylation; P:regulation of transcription, DNA-templated	EC:3.5.1.98	Histone deacetylase
Les.3085.1.S1_at	101249699	LOC101249699	flavonol synthase/flavanone 3-hydroxylase-like	XM_004250281	Solyc11g013110.1.1							0.0191829	0.482556	-2.0723							0.027841	0.490027	-2.0407							F:GO:0031418; P:GO:0051555; C:GO:0005737; F:GO:0005506; F:GO:0045431; F:GO:0045486; P:GO:0055114	F:L-ascorbic acid binding; P:flavonol biosynthetic process; C:cytoplasm; F:iron ion binding; F:flavonol synthase activity; F:naringenin 3-dioxygenase activity; P:oxidation-reduction process	EC:1.14.11; EC:1.14.11.9; EC:1.14.11.23	Acting on paired donors, with incorporation or reduction of molecular oxygen. The oxygen incorporated need not be derived from O(2); Flavanone 3-dioxygenase; Flavonol synthase
Les.3087.2.S1_at	101250638	LOC101250638	uncharacterized LOC101250638	XM_004248700 /// XM_004248701	Solyc10g050440.1.1																0.00718967	0.399872	-2.5008	0.0091996	0.437642	-2.28497	8.16517e-05	0.241844	-4.13489	C:GO:0009512; C:GO:0016021	C:cytochrome b6f complex; C:integral component of membrane
Les.309.1.A1_at	101254663	LOC101254663	uncharacterized LOC101254663	XM_004233879	Solyc02g067100.2.1							0.000738325	0.414085	-2.41496										4.28677e-06	0.262042	-3.81618				C:GO:0005819; P:GO:0032147; P:GO:0060236; C:GO:0005874	C:spindle; P:activation of protein kinase activity; P:regulation of mitotic spindle organization; C:microtubule
Les.3090.1.S1_at	101263845	LOC101263845	histone H3.2	XM_004229307//XM_004229308//XM_004229440//XM_004229554//XM_004231063//XM_004232890//XM_004248075	Solyc01g086820.2.1																			0.0226717	0.305323	-3.27522	0.0351561	0.330885	-3.0222	C:GO:0005634; F:GO:0003677; F:GO:0046982; C:GO:0000786	C:nucleus; F:DNA binding; F:protein heterodimerization activity; C:nucleosome
Les.3091.3.S1_at	101267059	LOC101267059	eukaryotic translation initiation factor 3 subunit B-like	XM_004229645	Solyc01g088370.2.1																0.0322003	0.225823	-4.42825							F:GO:0000166; F:GO:0003743; P:GO:0001731; C:GO:0016282; C:GO:0033290; F:GO:0031369; P:GO:0006446; C:GO:0005840; C:GO:0005852	F:nucleotide binding; F:translation initiation factor activity; P:formation of translation preinitiation complex; C:eukaryotic 43S preinitiation complex; C:eukaryotic 48S preinitiation complex; F:translation initiation factor binding; P:regulation of translational initiation; C:ribosome; C:eukaryotic translation initiation factor 3 complex
Les.3094.3.S1_at	101263716	LOC101263716	14 kDa proline-rich protein DC2.15-like	XM_004241734	Solyc06g065970.1.1							0.0413056	0.18418	-5.42948							0.0350877	0.158569	-6.3064				0.00206111	0.065466	-15.2751	P:GO:0006869; C:GO:0016021; F:GO:0008289; C:GO:0005576	P:lipid transport; C:integral component of membrane; F:lipid binding; C:extracellular region
Les.3095.1.S1_at	101267475	LOC101267475	NAC domain-containing protein 2-like	XM_004250338	Solyc11g017470.1.1	0.0159618	0.322168	-3.10397	0.00394563	3.80243	3.80243										0.000156526	6.60972	6.60972							C:GO:0005634; F:GO:0003677; P:GO:0006351; P:GO:0006355; P:GO:0009788	C:nucleus; F:DNA binding; P:transcription, DNA-templated; P:regulation of transcription, DNA-templated; P:negative regulation of abscisic acid-activated signaling pathway
Les.3097.1.S1_at	101265930	LOC101265930	60S ribosomal protein L14-1-like	XM_004240439	Solyc06g008260.2.1				0.0488519	0.296687	-3.37055																			F:GO:0003723; F:GO:0003735; P:GO:0042273; C:GO:0022625; C:GO:0005840; C:GO:0005622; P:GO:0006412	F:RNA binding; F:structural constituent of ribosome; P:ribosomal large subunit biogenesis; C:cytosolic large ribosomal subunit; C:ribosome; C:intracellular; P:translation
Les.3099.1.S1_at	101265249	LOC101265249	photosystem I reaction center subunit XI, chloroplastic-like	XM_004242416	Solyc06g082940.2.1																						0.000210981	0.455229	-2.1967	C:GO:0016021; P:GO:0015979; C:GO:0009538	C:integral component of membrane; P:photosynthesis; C:photosystem I reaction center
Les.31.1.S1_s_at	544127	TCTR1	ethylene-inducible CTR1-like protein kinase	XM_010329385	Solyc10g083610.1.1																0.00937216	2.70747	2.70747				0.0090058	2.59604	2.59604	F:GO:0005524; P:GO:0009069; F:GO:0004674; P:GO:0006468	F:ATP binding; P:serine family amino acid metabolic process; F:protein serine/threonine kinase activity; P:protein phosphorylation	EC:2.7.11	Transferring phosphorus-containing groups
Les.3101.3.A1_at	101262921	LOC101262921	protein disulfide-isomerase-like	XM_004240344	Solyc06g005940.2.1																4.75299e-07	3.76742	3.76742				0.000119468	2.31198	2.31198	F:GO:0003756; P:GO:0045454; C:GO:0005783; P:GO:0006457; P:GO:0034976; F:GO:0016853	F:protein disulfide isomerase activity; P:cell redox homeostasis; C:endoplasmic reticulum; P:protein folding; P:response to endoplasmic reticulum stress; F:isomerase activity	EC:5.3.4.1	Protein disulfide-isomerase
Les.3104.2.S1_at	101265669	LOC101265669	probable histone H2A.1-like	XM_004246417	Solyc09g010400.2.1																0.00443313	0.274332	-3.64522				0.000870643	0.224237	-4.45956	F:GO:0003677; C:GO:0000790; F:GO:0046982; P:GO:0006342; C:GO:0000786	F:DNA binding; C:nuclear chromatin; F:protein heterodimerization activity; P:chromatin silencing; C:nucleosome
Les.3113.1.S1_at	101258266	LOC101258266	methylsterol monooxygenase 2-2	XM_004240327 /// XM_004240328 /// XM_004240329	Solyc06g005750.2.1							0.0197654	0.391769	-2.55252										3.24115e-05	13.7832	13.7832	0.000900013	0.139616	-7.16253	F:GO:0005506; F:GO:0016491; C:GO:0016021; P:GO:0055114; P:GO:0006633	F:iron ion binding; F:oxidoreductase activity; C:integral component of membrane; P:oxidation-reduction process; P:fatty acid biosynthetic process
Les.3114.2.S1_at	101249788	LOC101249788	uncharacterized LOC101249788	XM_004250893	Solyc11g065740.1.1										0.0282662	0.436988	-2.28839				0.0232359	0.398761	-2.50777	0.0171531	0.402946	-2.48172
Les.3119.3.S1_at	101253094	LOC101253094	chloroplast stem-loop binding protein of 41 kDa b, chloroplastic-like	XM_004241364	Solyc06g073260.2.1																0.00872016	0.193988	-5.15495	0.0116245	0.230688	-4.33485	0.000151273	0.0840445	-11.8985	F:GO:0050662; F:GO:0003824; C:GO:0009536	F:coenzyme binding; F:catalytic activity; C:plastid
Les.312.1.A1_at	101263257	LOC101263257	ascorbate transporter, chloroplastic	XM_004231139	Solyc01g094720.2.1																0.0229556	2.82252	2.82252							F:GO:0005315; P:GO:0055085; P:GO:0098656; P:GO:0006817; C:GO:0016020; C:GO:0016021; C:GO:0009536	F:inorganic phosphate transmembrane transporter activity; P:transmembrane transport; P:anion transmembrane transport; P:phosphate ion transport; C:membrane; C:integral component of membrane; C:plastid
Les.3123.1.S1_at	101262299	LOC101262299	geranylgeranyl diphosphate reductase, chloroplastic-like	XM_004235945	Solyc03g115980.1.1																0.00061371	0.328032	-3.04848				2.79223e-06	0.190451	-5.2507	F:GO:0071949; P:GO:0015995; C:GO:0009507; F:GO:0016628; P:GO:0008033; P:GO:0033385; F:GO:0045550; P:GO:0033521; P:GO:0015979; P:GO:0055114; P:GO:0010189	F:FAD binding; P:chlorophyll biosynthetic process; C:chloroplast; F:oxidoreductase activity, acting on the CH-CH group of donors, NAD or NADP as acceptor; P:tRNA processing; P:geranylgeranyl diphosphate metabolic process; F:geranylgeranyl reductase activity; P:phytyl diphosphate biosynthetic process; P:photosynthesis; P:oxidation-reduction process; P:vitamin E biosynthetic process
Les.3124.3.S1_at	100316894	PP2C-1	protein phosphatase 2C ABI2 homolog	NM_001247757	Solyc03g121880.2.1																0.0446817	0.241626	-4.13864							F:GO:0004722; C:GO:0008287; F:GO:0046872; P:GO:0006470	F:protein serine/threonine phosphatase activity; C:protein serine/threonine phosphatase complex; F:metal ion binding; P:protein dephosphorylation	EC:3.1.3.16; EC:3.1.3.41	Protein-serine/threonine phosphatase; 4-nitrophenylphosphatase
Les.3125.1.S1_at	543626	XET4	xyloglucan endotransglycosylase	NM_001247440	Solyc11g065600.1.1				0.00686152	0.188595	-5.30238	0.00486771	0.188905	-5.29368										0.0240155	0.281361	-3.55416	0.0490952	0.329922	-3.03102	C:GO:0005618; C:GO:0048046; C:GO:0016021; P:GO:0071555; F:GO:0004553; F:GO:0016762; P:GO:0010411; P:GO:0042546	C:cell wall; C:apoplast; C:integral component of membrane; P:cell wall organization; F:hydrolase activity, hydrolyzing O-glycosyl compounds; F:xyloglucan:xyloglucosyl transferase activity; P:xyloglucan metabolic process; P:cell wall biogenesis	EC:2.4.1.207	Xyloglucan:xyloglucosyl transferase
Les.3126.1.S1_at	100271890	ZIP	bZIP transcription factor	NM_001246936	Solyc01g109880.2.1																			0.0467989	2.85329	2.85329				C:GO:0005667; F:GO:0003700; P:GO:0006355; F:GO:0043565; P:GO:0006355	C:transcription factor complex; F:transcription factor activity, sequence-specific DNA binding; P:regulation of transcription, DNA-templated; F:sequence-specific DNA binding; P:regulation of transcription, DNA-templated
Les.3126.2.A1_at	101260158	LOC101260158	uncharacterized LOC101260158	XM_004244340	Solyc08g005010.2.1							0.0124256	0.255815	-3.90907							0.00375472	0.274108	-3.64819	0.00678656	0.229954	-4.3487	0.00114922	0.241725	-4.13693	F:GO:0016746; C:GO:0016021	F:transferase activity, transferring acyl groups; C:integral component of membrane
Les.3127.1.S1_a_at	101254439	LOC101254439	serine hydroxymethyltransferase, mitochondrial-like	XM_004231933	Solyc02g091560.2.1										0.0334325	0.494586	-2.02189				0.00406635	0.155984	-6.4109				0.0031174	0.1603	-6.2383	C:GO:0009570; F:GO:0030170; C:GO:0022626; P:GO:0006563; P:GO:0009853; C:GO:0009534; F:GO:0008266; P:GO:0006545; P:GO:0009416; P:GO:0006544; P:GO:0009409; C:GO:0009507; F:GO:0003824; C:GO:0010319; C:GO:0048046; P:GO:0035999; C:GO:0005829; F:GO:0004372; P:GO:0046686; P:GO:0007623; P:GO:0006730; C:GO:0005886; C:GO:0005634; C:GO:0005739; C:GO:0016020; F:GO:0016740	C:chloroplast stroma; F:pyridoxal phosphate binding; C:cytosolic ribosome; P:L-serine metabolic process; P:photorespiration; C:chloroplast thylakoid; F:poly(U) RNA binding; P:glycine biosynthetic process; P:response to light stimulus; P:glycine metabolic process; P:response to cold; C:chloroplast; F:catalytic activity; C:stromule; C:apoplast; P:tetrahydrofolate interconversion; C:cytosol; F:glyci…	EC:2.1.2.1	Glycine hydroxymethyltransferase
Les.3128.2.S1_s_at	101254516	LOC101254516	tropinone reductase 1-like	XM_004246380	Solyc09g011140.2.1																0.0025971	0.236566	-4.22715	0.0148733	2.85563	2.85563				F:GO:0016491; P:GO:0055114	F:oxidoreductase activity; P:oxidation-reduction process
Les.3136.1.S1_at	101260673	LOC101260673	coproporphyrinogen-III oxidase, chloroplastic-like	XM_004248364	Solyc10g005110.2.1																0.00342819	0.366214	-2.73065	0.0135141	0.463227	-2.15877	0.000121655	0.257234	-3.8875	P:GO:0015995; C:GO:0009507; F:GO:0042803; F:GO:0004109; P:GO:0055114; P:GO:0006782	P:chlorophyll biosynthetic process; C:chloroplast; F:protein homodimerization activity; F:coproporphyrinogen oxidase activity; P:oxidation-reduction process; P:protoporphyrinogen IX biosynthetic process	EC:1.3.3.3	Coproporphyrinogen oxidase
Les.3137.1.S1_at	101259053	LOC101259053	exosome complex component RRP43-like	XM_004241215	Solyc06g075390.2.1										0.0487836	0.358338	-2.79066				0.0407618	0.31877	-3.13706				0.00645916	0.221675	-4.5111	P:GO:0006396; C:GO:0000178; P:GO:0006401	P:RNA processing; C:exosome (RNase complex); P:RNA catabolic process
Les.314.1.A1_at	100736527	LOC100736527	putative PIP-type aquaporin	NM_001246917	Solyc10g055630.1.1																0.0120038	0.0508268	-19.6747	0.00700185	0.295871	-3.37985				C:GO:0005887; P:GO:0006833; C:GO:0009506; F:GO:0015254; P:GO:0009992; P:GO:0015793; P:GO:0034220; F:GO:0015250; C:GO:0005773	C:integral component of plasma membrane; P:water transport; C:plasmodesma; F:glycerol channel activity; P:cellular water homeostasis; P:glycerol transport; P:ion transmembrane transport; F:water channel activity; C:vacuole
Les.3144.1.A1_at	101255306	LOC101255306	uncharacterized LOC101255306	XM_004241791	Solyc06g065180.2.1																0.000183304	2.17246	2.17246							F:GO:0004129; C:GO:0045277; P:GO:1902600; C:GO:0016021; P:GO:0006123	F:cytochrome-c oxidase activity; C:respiratory chain complex IV; P:hydrogen ion transmembrane transport; C:integral component of membrane; P:mitochondrial electron transport, cytochrome c to oxygen	EC:1.9.3.1	Cytochrome-c oxidase
Les.3146.1.S1_at	101261134	LOC101261134	ketol-acid reductoisomerase, chloroplastic-like	XM_004243362	Solyc07g053280.2.1																0.00345338	0.484153	-2.06546							P:GO:0009097; P:GO:0015940; F:GO:0046872; P:GO:0009099; P:GO:0009098; C:GO:0016021; P:GO:0055114; F:GO:0004455; F:GO:0016853	P:isoleucine biosynthetic process; P:pantothenate biosynthetic process; F:metal ion binding; P:valine biosynthetic process; P:leucine biosynthetic process; C:integral component of membrane; P:oxidation-reduction process; F:ketol-acid reductoisomerase activity; F:isomerase activity	EC:1.1.1.86	Ketol-acid reductoisomerase (NADP(+))
Les.3148.2.S1_at	101253560	LOC101253560	20 kDa chaperonin, chloroplastic-like	XM_004251655	Solyc12g009250.1.1																0.032675	0.267442	-3.73913				0.025409	0.266978	-3.74563	F:GO:0005524; F:GO:0046914; P:GO:1901671; C:GO:0005737; P:GO:0006457	F:ATP binding; F:transition metal ion binding; P:positive regulation of superoxide dismutase activity; C:cytoplasm; P:protein folding	EC:1.97.1	Other oxidoreductases
Les.3149.1.A1_at	101253641	LOC101253641	60S ribosomal protein L4-1-like	XM_004249545	Solyc10g086010.1.1																0.00130232	2.0204	2.0204							F:GO:0003723; F:GO:0003735; P:GO:0002181; P:GO:0042254; C:GO:0022625; C:GO:0005840; P:GO:0006412	F:RNA binding; F:structural constituent of ribosome; P:cytoplasmic translation; P:ribosome biogenesis; C:cytosolic large ribosomal subunit; C:ribosome; P:translation
Les.3153.1.S1_at	101268336	LOC101268336	ferredoxin-thioredoxin reductase catalytic chain, chloroplastic-like	XM_004232221	Solyc02g087230.2.1																0.0022654	0.240399	-4.15975	0.0102024	0.337877	-2.95966	0.00101702	0.225929	-4.42617	C:GO:0009570; P:GO:0006094; F:GO:0047937; P:GO:0006096; C:GO:0009941; P:GO:0055114; F:GO:0016730; P:GO:0005982; P:GO:0005985	C:chloroplast stroma; P:gluconeogenesis; F:glucose-1-phosphate phosphodismutase activity; P:glycolytic process; C:chloroplast envelope; P:oxidation-reduction process; F:oxidoreductase activity, acting on iron-sulfur proteins as donors; P:starch metabolic process; P:sucrose metabolic process	EC:2.7.1.41	Glucose-1-phosphate phosphodismutase
Les.3154.1.A1_at	101250811	LOC101250811	50S ribosomal protein L21, chloroplastic-like	XM_004241776	Solyc06g065390.2.1																0.0176263	0.265721	-3.76334	0.00184122	0.48516	-2.06117	1.61379e-05	0.319118	-3.13364	C:GO:0009570; C:GO:0005634; F:GO:0003723; F:GO:0003735; P:GO:0009793; C:GO:0009941; P:GO:0010027; P:GO:0042254; C:GO:0005762; P:GO:0009658; P:GO:0006412	C:chloroplast stroma; C:nucleus; F:RNA binding; F:structural constituent of ribosome; P:embryo development ending in seed dormancy; C:chloroplast envelope; P:thylakoid membrane organization; P:ribosome biogenesis; C:mitochondrial large ribosomal subunit; P:chloroplast organization; P:translation
Les.3155.1.S1_at	101260872	LOC101260872	ubiquitin-conjugating enzyme E2 28-like	XM_004248024	Solyc10g011740.2.1							0.00667312	2.5886	2.5886							0.0187012	2.33264	2.33264				0.00806807	2.52184	2.52184	F:GO:0004842; F:GO:0005524; C:GO:0005737; C:GO:0005886; P:GO:0006511; P:GO:0016567	F:ubiquitin-protein transferase activity; F:ATP binding; C:cytoplasm; C:plasma membrane; P:ubiquitin-dependent protein catabolic process; P:protein ubiquitination
Les.3157.1.S1_at	101261104	LOC101261104	bidirectional sugar transporter SWEET11-like	XM_004235278	Solyc03g097870.2.1																						0.0119162	2.23645	2.23645	C:GO:0016021; P:GO:0034219; F:GO:0051119	C:integral component of membrane; P:carbohydrate transmembrane transport; F:sugar transmembrane transporter activity
Les.3159.2.S1_at	101252011	LOC101252011	beta-adaptin-like protein C-like	XM_004245536	Solyc08g081320.2.1																0.00264705	0.383046	-2.61065				0.0124362	0.479944	-2.08358	P:GO:0016192; C:GO:0030131; F:GO:0008565; P:GO:0006886	P:vesicle-mediated transport; C:clathrin adaptor complex; F:protein transporter activity; P:intracellular protein transport
Les.3160.2.S1_at	101254866	LOC101254866	heat shock cognate 70 kDa protein 1-like	XM_004250910	Solyc11g066060.1.1																			6.17359e-07	2.90463	2.90463				F:GO:0005524	F:ATP binding
Les.3163.3.S1_at	101267743	LOC101267743	uncharacterized LOC101267743	XM_004230404	Solyc01g103540.2.1																0.00070542	0.372519	-2.68442							F:GO:0003723	F:RNA binding
Les.3164.2.S1_at	101263123	LOC101263123	BTB/POZ and TAZ domain-containing protein 2-like	XM_004241479	Solyc06g071820.2.1							0.00498137	0.14068	-7.10831							0.00162459	0.0933679	-10.7103				0.0274388	0.226588	-4.41329	F:GO:0004402; C:GO:0005667; F:GO:0008270; P:GO:0042967; F:GO:0003712; P:GO:0006355; P:GO:0016573; P:GO:0006355; C:GO:0000123	F:histone acetyltransferase activity; C:transcription factor complex; F:zinc ion binding; P:acyl-carrier-protein biosynthetic process; F:transcription cofactor activity; P:regulation of transcription, DNA-templated; P:histone acetylation; P:regulation of transcription, DNA-templated; C:histone acetyltransferase complex	EC:2.3.1.48	Histone acetyltransferase
Les.3166.1.S1_at	101248806	LOC101248806	protein HOTHEAD-like	XM_004245611	Solyc08g080190.2.1													0.000708135	0.402948	-2.48171										F:GO:0016614; F:GO:0050660; P:GO:0055114	F:oxidoreductase activity, acting on CH-OH group of donors; F:flavin adenine dinucleotide binding; P:oxidation-reduction process
Les.3167.1.S1_at	543639	LOC543639	pyruvate dehydrogenase	XM_004238686	Solyc05g006520.2.1																0.000334958	2.03553	2.03553							P:GO:0009097; P:GO:0006094; P:GO:0006086; C:GO:0045254; C:GO:0005759; F:GO:0004739; P:GO:0009099; P:GO:0006096; P:GO:0009098; P:GO:0055114	P:isoleucine biosynthetic process; P:gluconeogenesis; P:acetyl-CoA biosynthetic process from pyruvate; C:pyruvate dehydrogenase complex; C:mitochondrial matrix; F:pyruvate dehydrogenase (acetyl-transferring) activity; P:valine biosynthetic process; P:glycolytic process; P:leucine biosynthetic process; P:oxidation-reduction process	EC:1.2.4.1	Pyruvate dehydrogenase (acetyl-transferring)
Les.3168.1.S1_at	543809	INS-1P	INS-1P protein	XM_004239946	Solyc05g051850.2.1																0.000415733	3.37639	3.37639	0.000265678	3.282	3.282	0.00191828	2.67136	2.67136	F:GO:0004512; P:GO:0006021; P:GO:0008654; P:GO:0019872	F:inositol-3-phosphate synthase activity; P:inositol biosynthetic process; P:phospholipid biosynthetic process; P:streptomycin biosynthetic process	EC:5.5.1.4	Inositol-3-phosphate synthase
Les.317.1.S1_at	101255105	LOC101255105	cytochrome P450 90A1	XM_004240898	Solyc06g051750.2.1																			1.38953e-06	0.288429	-3.46706				P:GO:0048657; P:GO:0009911; F:GO:0020037; F:GO:0050598; F:GO:0005506; C:GO:0016021; P:GO:0016132; P:GO:0055114; P:GO:0016102; P:GO:0010584; P:GO:0016125; P:GO:0010224; P:GO:0010268	P:anther wall tapetum cell differentiation; P:positive regulation of flower development; F:heme binding; F:taxane 13-alpha-hydroxylase activity; F:iron ion binding; C:integral component of membrane; P:brassinosteroid biosynthetic process; P:oxidation-reduction process; P:diterpenoid biosynthetic process; P:pollen exine formation; P:sterol metabolic process; P:response to UV-B; P:brassinosteroid h…	EC:1.14.13; EC:1.14.13.77	Acting on paired donors, with incorporation or reduction of molecular oxygen. The oxygen incorporated need not be derived from O(2); Taxane 13-alpha-hydroxylase
Les.3170.2.S1_at	101264609	LOC101264609	photosystem I reaction center subunit VI, chloroplastic-like	XM_004235626	Solyc03g120640.2.1																0.0120895	0.39168	-2.5531				0.000125968	0.21997	-4.54608	P:GO:0015979; C:GO:0009538	P:photosynthesis; C:photosystem I reaction center
Les.3171.3.S1_a_at	543988	Psy1	phytoene synthase 1, chloroplastic	NM_001247883	Solyc03g031860.2.1							0.0267797	3.20038	3.20038							1.14234e-05	5.33676	5.33676	0.000320625	0.306249	-3.26531	0.0177697	2.06375	2.06375	P:GO:0016117; F:GO:0016767; C:GO:0009507; C:GO:0016021; C:GO:0009575; P:GO:0006694; P:GO:0016102	P:carotenoid biosynthetic process; F:geranylgeranyl-diphosphate geranylgeranyltransferase activity; C:chloroplast; C:integral component of membrane; C:chromoplast stroma; P:steroid biosynthetic process; P:diterpenoid biosynthetic process	EC:2.5.1.32; EC:2.5.1.10	15-cis-phytoene synthase; (2E,6E)-farnesyl diphosphate synthase
Les.3172.1.S1_at	101248052	LOC101248052	glutathione S-transferase zeta class-like	XM_004230339 /// XM_004230340 /// XM_004230341	Solyc01g102660.2.1																			3.02913e-06	3.75695	3.75695	7.02253e-05	2.88556	2.88556	P:GO:0006803; P:GO:0009072; C:GO:0005737; P:GO:0006749; F:GO:0004364	P:obsolete glutathione conjugation reaction; P:aromatic amino acid family metabolic process; C:cytoplasm; P:glutathione metabolic process; F:glutathione transferase activity	EC:2.5.1.18	Glutathione transferase
Les.3173.3.A1_at	101255399	LOC101255399	caffeoylshikimate esterase	XM_004239632	Solyc05g056000.2.1																0.00208388	3.2296	3.2296				0.00686066	2.59732	2.59732	C:GO:0016020; P:GO:0016042; F:GO:0016298	C:membrane; P:lipid catabolic process; F:lipase activity
Les.3174.1.S1_at	101249787	LOC101249787	probable fructose-bisphosphate aldolase 2, chloroplastic-like	XM_004233502	Solyc02g062340.2.1																			0.00139515	0.348904	-2.86612	0.000294735	0.28397	-3.52149	P:GO:0006094; P:GO:0006020; P:GO:0006098; P:GO:0006096; P:GO:0006013; P:GO:0006000; F:GO:0004332; P:GO:0015976	P:gluconeogenesis; P:inositol metabolic process; P:pentose-phosphate shunt; P:glycolytic process; P:mannose metabolic process; P:fructose metabolic process; F:fructose-bisphosphate aldolase activity; P:carbon utilization	EC:4.1.2.13	Fructose-bisphosphate aldolase
Les.3175.1.S1_at	101257518	LOC101257518	magnesium-protoporphyrin IX monomethyl ester [oxidative] cyclase, chloroplastic-like	XM_004249051	Solyc10g077040.1.1							0.00438229	0.497594	-2.00967							7.62474e-05	0.326468	-3.06309				2.27811e-05	0.308617	-3.24027	P:GO:0015995; F:GO:0046872; P:GO:0015979; P:GO:0055114; F:GO:0048529	P:chlorophyll biosynthetic process; F:metal ion binding; P:photosynthesis; P:oxidation-reduction process; F:magnesium-protoporphyrin IX monomethyl ester (oxidative) cyclase activity	EC:1.14.13.81; EC:1.14.13	Magnesium-protoporphyrin IX monomethyl ester (oxidative) cyclase; Acting on paired donors, with incorporation or reduction of molecular oxygen. The oxygen incorporated need not be derived from O(2)
Les.3178.2.A1_at	101254025	LOC101254025	uncharacterized LOC101254025	XM_004246721 /// XM_004246722	Solyc09g005270.2.1							0.0138926	2.06174	2.06174							0.00746335	2.31127	2.31127				0.012743	2.08335	2.08335	F:GO:0003723	F:RNA binding
Les.3179.1.A1_at	101252869	LOC101252869	dnaJ protein homolog	XM_004236756 /// XM_004236757	Solyc04g009770.2.1																			7.54194e-06	2.22119	2.22119				F:GO:0005524; F:GO:0031072; P:GO:0009408; F:GO:0046872; F:GO:0051082; P:GO:0006457	F:ATP binding; F:heat shock protein binding; P:response to heat; F:metal ion binding; F:unfolded protein binding; P:protein folding
Les.3180.2.S1_at	101268560	LOC101268560	calcium sensing receptor, chloroplastic-like	XM_004236049	Solyc03g114450.2.1																0.0177532	0.238461	-4.19356				0.0101345	0.223581	-4.47264	P:GO:0009704; P:GO:0071277; P:GO:0090333; C:GO:0005739; C:GO:0016021; C:GO:0009535	P:de-etiolation; P:cellular response to calcium ion; P:regulation of stomatal closure; C:mitochondrion; C:integral component of membrane; C:chloroplast thylakoid membrane
Les.3185.2.S1_at	101250574	LOC101250574	40S ribosomal protein SA-like	XM_004234267	Solyc03g019780.2.1																0.0466325	0.183279	-5.45617				0.0318774	0.17279	-5.78739	P:GO:0006407; P:GO:0000461; F:GO:0003735; C:GO:0022627; P:GO:0000447; P:GO:0000028; C:GO:0030686; P:GO:0006412	P:rRNA export from nucleus; P:endonucleolytic cleavage to generate mature 3'-end of SSU-rRNA from (SSU-rRNA, 5.8S rRNA, LSU-rRNA); F:structural constituent of ribosome; C:cytosolic small ribosomal subunit; P:endonucleolytic cleavage in ITS1 to separate SSU-rRNA from 5.8S rRNA and LSU-rRNA from tricistronic rRNA transcript (SSU-rRNA, 5.8S rRNA, LSU-rRNA); P:ribosomal small subunit assembly; C:90S …
Les.3186.1.S1_at	101262534	LOC101262534	putative cell wall protein-like	XM_004243283	Solyc07g054310.1.1																0.0200505	0.121422	-8.23573	0.0037384	0.0780263	-12.8162	0.00495108	0.0820637	-12.1857	C:GO:0016021	C:integral component of membrane
Les.3187.1.S1_at	100134875	GLO2	glycolate oxidase	XM_004248176 /// XM_004248177	Solyc10g007600.2.1							0.00154327	0.301617	-3.31546	0.000653902	0.274397	-3.64435										0.00436445	0.34856	-2.86895	F:GO:0052852; F:GO:0052853; F:GO:0010181; P:GO:0055114; F:GO:0052854	F:very-long-chain-(S)-2-hydroxy-acid oxidase activity; F:long-chain-(S)-2-hydroxy-long-chain-acid oxidase activity; F:FMN binding; P:oxidation-reduction process; F:medium-chain-(S)-2-hydroxy-acid oxidase activity	EC:1.1.3.15	(S)-2-hydroxy-acid oxidase
Les.319.1.A1_at	101263757	LOC101263757	probable nucleolar protein 5-2-like	XM_004247579	Solyc09g083080.2.1	4.83724e-05	3.43661	3.43661										0.00066985	2.38142	2.38142										C:GO:0031428; C:GO:0032040; P:GO:0000154; F:GO:0030515	C:box C/D snoRNP complex; C:small-subunit processome; P:rRNA modification; F:snoRNA binding
Les.3190.2.S1_at	778347	CIP2a	CONSTANS interacting protein 2a	NM_001247315	Solyc06g072040.1.1																0.0475209	0.282212	-3.54344				0.00799491	0.18759	-5.33076	C:GO:0005634; F:GO:0046982	C:nucleus; F:protein heterodimerization activity
Les.3193.1.S1_at	101244463	LOC101244463	dynein light chain LC6, flagellar outer arm-like	XM_004252298	Solyc12g044240.1.1										0.0193042	2.3059	2.3059										0.0450078	2.04601	2.04601	C:GO:0030286; P:GO:0007017	C:dynein complex; P:microtubule-based process
Les.3194.1.S1_at	101250395	LOC101250395	uncharacterized LOC101250395	XM_004237396	Solyc04g053130.2.1																0.0342167	2.91074	2.91074				0.00919053	3.61992	3.61992	C:GO:0016021; C:GO:0009535	C:integral component of membrane; C:chloroplast thylakoid membrane
Les.3195.1.S1_at	100191125	GWD	glucan water dikinase	NM_001247476	Solyc05g005020.2.1																0.0194388	0.458385	-2.18157							C:GO:0009570; F:GO:0005524; F:GO:0050521; C:GO:0009365; F:GO:0046872; C:GO:0005739; C:GO:0009941; P:GO:0009631; P:GO:0005983; F:GO:0004673; P:GO:0018106	C:chloroplast stroma; F:ATP binding; F:alpha-glucan, water dikinase activity; C:protein histidine kinase complex; F:metal ion binding; C:mitochondrion; C:chloroplast envelope; P:cold acclimation; P:starch catabolic process; F:protein histidine kinase activity; P:peptidyl-histidine phosphorylation	EC:2.7.13.3; EC:2.7.9.4	Histidine kinase; Alpha-glucan, water dikinase
Les.32.2.S1_a_at	544219	LOC544219	cryptochrome 1	NM_001247738	Solyc04g074180.2.1																			0.0158865	2.65459	2.65459				F:GO:0009882; P:GO:0009785; P:GO:0009414	F:blue light photoreceptor activity; P:blue light signaling pathway; P:response to water deprivation
Les.3209.1.S1_at	101256941	LOC101256941	histone H4-like	XM_004251244	Solyc11g072860.1.1																			0.0278128	0.310204	-3.22368	0.0129146	0.254571	-3.92818	C:GO:0005634; F:GO:0003677; F:GO:0046982; C:GO:0000786; P:GO:0006334	C:nucleus; F:DNA binding; F:protein heterodimerization activity; C:nucleosome; P:nucleosome assembly
Les.321.1.S1_at	543902	Hsp90-1	molecular chaperone Hsp90-1	NM_001247507	Solyc12g015880.1.1							2.59696e-05	2.05445	2.05445										4.07392e-09	3.48726	3.48726				F:GO:0005524; C:GO:0005737; P:GO:0009870; F:GO:0051082; P:GO:0006457; P:GO:0006950	F:ATP binding; C:cytoplasm; P:defense response signaling pathway, resistance gene-dependent; F:unfolded protein binding; P:protein folding; P:response to stress
Les.3210.2.A1_a_at	101264531	LOC101264531	ribonuclease 3-like	XM_004242617	Solyc07g006570.2.1																			0.0082068	3.1826	3.1826				P:GO:0090502; F:GO:0003723; F:GO:0033897	P:RNA phosphodiester bond hydrolysis, endonucleolytic; F:RNA binding; F:ribonuclease T2 activity	EC:3.1.31; EC:3.1.27; EC:3.1.27.1	Acting on ester bonds; Acting on ester bonds; Ribonuclease T(2)
Les.3213.1.S1_at	101249842	LOC101249842	(S)-coclaurine N-methyltransferase-like	XM_004245020	Solyc08g062610.2.1																0.0168093	0.172477	-5.79789	0.0159069	0.190175	-5.25832	0.0218151	0.202663	-4.9343	C:GO:0005802; C:GO:0005768; P:GO:0008610; C:GO:0005774; F:GO:0008757; P:GO:0032259	C:trans-Golgi network; C:endosome; P:lipid biosynthetic process; C:vacuolar membrane; F:S-adenosylmethionine-dependent methyltransferase activity; P:methylation
Les.3214.1.S1_at	100316902	GME1	GDP-mannose 3',5'-epimerase	NM_001247805	Solyc01g097340.2.1																			6.76965e-07	0.286096	-3.49533				F:GO:0047918; F:GO:0050662	F:GDP-mannose 3,5-epimerase activity; F:coenzyme binding	EC:5.1.3.18	GDP-mannose 3,5-epimerase
Les.3216.2.S1_at	101249161	LOC101249161	IAA-amino acid hydrolase ILR1-like 4-like	XM_004235576	Solyc03g121270.2.1																			0.000255693	2.95261	2.95261				P:GO:0008152; F:GO:0016787	P:metabolic process; F:hydrolase activity
Les.322.1.S1_at	101262900	LOC101262900	protein phosphatase 2C 57-like	XM_004234935	Solyc03g082960.2.1																			8.55429e-06	0.488171	-2.04846				F:GO:0004722; C:GO:0008287; F:GO:0046872; P:GO:0006470	F:protein serine/threonine phosphatase activity; C:protein serine/threonine phosphatase complex; F:metal ion binding; P:protein dephosphorylation	EC:3.1.3.16; EC:3.1.3.41	Protein-serine/threonine phosphatase; 4-nitrophenylphosphatase
Les.3221.1.S1_a_at	---	---	Unknown Protein	---	Solyc06g036770.1.1							0.0262412	4.09862	4.09862							0.0181603	4.88983	4.88983				0.00101455	9.40607	9.40607
Les.3224.2.S1_at	101247549	LOC101247549	40S ribosomal protein S14-2-like	XM_004246442	Solyc09g010100.2.1																0.0276922	0.379411	-2.63567							P:GO:0000462; F:GO:0003735; F:GO:0048027; C:GO:0022627; P:GO:0000028; F:GO:0070181; P:GO:0006412	P:maturation of SSU-rRNA from tricistronic rRNA transcript (SSU-rRNA, 5.8S rRNA, LSU-rRNA); F:structural constituent of ribosome; F:mRNA 5'-UTR binding; C:cytosolic small ribosomal subunit; P:ribosomal small subunit assembly; F:small ribosomal subunit rRNA binding; P:translation
Les.3225.2.S1_at	100125909	LOC100125909	1-aminocyclopropane-1-carboxylate oxidase	NM_001247709	Solyc02g036350.2.1																0.0452788	0.376956	-2.65283							F:GO:0051213; F:GO:0046872; P:GO:0009693; P:GO:0055114	F:dioxygenase activity; F:metal ion binding; P:ethylene biosynthetic process; P:oxidation-reduction process
Les.3227.2.S1_at	101250366	LOC101250366	UPF0587 protein C1orf123 homolog	XM_004251142	Solyc11g070050.1.1																0.00389637	0.2496	-4.00641				0.0417005	0.412275	-2.42557	C:GO:0070062	C:extracellular exosome
Les.3228.3.A1_at	101246709	LOC101246709	cysteine proteinase RD21a-like	XM_004238081	Solyc04g078540.2.1										0.00107906	2.15706	2.15706				0.000814304	2.33301	2.33301				0.000449407	2.35658	2.35658	C:GO:0005615; P:GO:0006508; F:GO:0004197; F:GO:0008234; F:GO:0008233; P:GO:0051603; F:GO:0016787; C:GO:0005764	C:extracellular space; P:proteolysis; F:cysteine-type endopeptidase activity; F:cysteine-type peptidase activity; F:peptidase activity; P:proteolysis involved in cellular protein catabolic process; F:hydrolase activity; C:lysosome	EC:3.4.22	Acting on peptide bonds (peptidases)
Les.3232.1.A1_at	101245616	LOC101245616	phospholipase A1-Igamma3, chloroplastic-like	XM_004250879	Solyc11g065530.1.1							0.00433406	2.44047	2.44047	4.26678e-05	4.06566	4.06566				0.0127117	3.47507	3.47507	8.43969e-07	18.2947	18.2947	2.94279e-05	9.88621	9.88621	C:GO:0009507; P:GO:0046486; P:GO:0016042; F:GO:0004806; F:GO:0008970; F:GO:0047714; F:GO:0016787	C:chloroplast; P:glycerolipid metabolic process; P:lipid catabolic process; F:triglyceride lipase activity; F:phosphatidylcholine 1-acylhydrolase activity; F:galactolipase activity; F:hydrolase activity	EC:3.1.1.26; EC:3.1.1.32; EC:3.1.1.1; EC:3.1.1.3	Galactolipase; Phospholipase A(1); Carboxylesterase; Triacylglycerol lipase
Les.3233.1.S1_at	101259390	LOC101259390	ninja-family protein AFP3-like	XM_004232112	Solyc02g088910.2.1							0.0126744	2.14476	2.14476							0.00855137	2.34598	2.34598				0.00100916	2.90111	2.90111	P:GO:0010581; C:GO:0005634; P:GO:0007165; P:GO:0009788	P:regulation of starch biosynthetic process; C:nucleus; P:signal transduction; P:negative regulation of abscisic acid-activated signaling pathway
Les.3234.1.A1_at	101265784	LOC101265784	ferredoxin-1, chloroplastic-like	XM_004248998	Solyc10g075160.1.1																						0.000540476	0.318961	-3.13518	C:GO:0009507; P:GO:0006118; F:GO:0005515; F:GO:0008198; F:GO:0009055; P:GO:0006124; P:GO:0022900; F:GO:0051537	C:chloroplast; P:obsolete electron transport; F:protein binding; F:ferrous iron binding; F:electron carrier activity; P:ferredoxin metabolic process; P:electron transport chain; F:2 iron, 2 sulfur cluster binding
Les.3237.2.S1_at	101259949	LOC101259949	uncharacterized LOC101259949	XM_004242398	Solyc06g082970.2.1																			4.70387e-10	0.213255	-4.68922	4.39759e-08	0.296291	-3.37506	C:GO:0016021; C:GO:0010598; C:GO:0009535	C:integral component of membrane; C:NAD(P)H dehydrogenase complex (plastoquinone); C:chloroplast thylakoid membrane
Les.324.1.S1_at	101245121	LOC101245121	photosystem I reaction center subunit III, chloroplastic-like	XM_004233150	Solyc02g069460.2.1																						3.43274e-06	0.162008	-6.17254	C:GO:0009507; C:GO:0016021; P:GO:0015979; C:GO:0009538	C:chloroplast; C:integral component of membrane; P:photosynthesis; C:photosystem I reaction center
Les.3241.1.S1_at	101252268	LOC101252268	probable serine incorporator-like	XM_004235830	Solyc03g117770.2.1																			8.37776e-06	2.21516	2.21516				C:GO:0016021; F:GO:0015194; P:GO:0015825	C:integral component of membrane; F:L-serine transmembrane transporter activity; P:L-serine transport
Les.3242.3.S1_at	101249445	LOC101249445	glyceraldehyde-3-phosphate dehydrogenase B, chloroplastic-like	XM_004253074	Solyc12g094640.1.1										0.00253878	0.102659	-9.74099				0.0211769	0.239347	-4.17803	9.87171e-05	0.0776986	-12.8702	0.000153233	0.0819836	-12.1976	C:GO:0009570; P:GO:0006094; P:GO:0006096; P:GO:0046686; F:GO:0004365; P:GO:0009416; C:GO:0009535; P:GO:0009744; P:GO:0009409; F:GO:0050661; F:GO:0051287; C:GO:0031969; C:GO:0010319; C:GO:0048046; F:GO:0047100; P:GO:0019253; C:GO:0005829; P:GO:0055114; P:GO:0015976	C:chloroplast stroma; P:gluconeogenesis; P:glycolytic process; P:response to cadmium ion; F:glyceraldehyde-3-phosphate dehydrogenase (NAD+) (phosphorylating) activity; P:response to light stimulus; C:chloroplast thylakoid membrane; P:response to sucrose; P:response to cold; F:NADP binding; F:NAD binding; C:chloroplast membrane; C:stromule; C:apoplast; F:glyceraldehyde-3-phosphate dehydrogenase (N…	EC:1.2.1.59; EC:1.2.1.13; EC:1.2.1.12	Glyceraldehyde-3-phosphate dehydrogenase (NAD(P)(+)) (phosphorylating); Glyceraldehyde-3-phosphate dehydrogenase (NADP(+)) (phosphorylating); Glyceraldehyde-3-phosphate dehydrogenase (phosphorylating)
Les.3244.2.A1_at	101258600	LOC101258600	uncharacterized LOC101258600	XM_004230206	Solyc01g099850.2.1										0.0419552	2.2521	2.2521				0.0345303	2.47335	2.47335				0.00358193	3.48102	3.48102	P:GO:0006979; C:GO:0016020; C:GO:0016021	P:response to oxidative stress; C:membrane; C:integral component of membrane
Les.3248.3.S1_at	101249039	LOC101249039	shaggy-related protein kinase eta-like	XM_004232999	Solyc02g072300.2.1																0.00738108	0.469366	-2.13053							F:GO:0050321; F:GO:0005524; F:GO:0008270; P:GO:0009069; F:GO:0004674; P:GO:0006468	F:tau-protein kinase activity; F:ATP binding; F:zinc ion binding; P:serine family amino acid metabolic process; F:protein serine/threonine kinase activity; P:protein phosphorylation	EC:2.7.11; EC:2.7.11.26	Transferring phosphorus-containing groups; [Tau protein] kinase
Les.325.2.S1_at	101253996	LOC101253996	probable inactive serine/threonine-protein kinase slob1	XM_004237779	Solyc04g071930.2.1																0.0463418	0.491215	-2.03577	0.00251784	0.341765	-2.92599	0.00101751	0.297241	-3.36428	F:GO:0022891; P:GO:0055085; C:GO:0009535	F:substrate-specific transmembrane transporter activity; P:transmembrane transport; C:chloroplast thylakoid membrane
Les.3250.1.A1_at	101262200	LOC101262200	SNF1-related protein kinase regulatory subunit gamma-1-like	XM_004236280	Solyc03g111310.2.1																			0.00767106	2.35437	2.35437	0.0210628	2.09136	2.09136	P:GO:0045859; F:GO:0019887; C:GO:0009505	P:regulation of protein kinase activity; F:protein kinase regulator activity; C:plant-type cell wall
Les.3252.2.S1_at	101245686	LOC101245686	60S ribosomal protein L10a-1-like	XM_004228405	Solyc01g009520.2.1																0.040785	0.321304	-3.11232							F:GO:0003723; F:GO:0003735; P:GO:0000470; C:GO:0022625; P:GO:0006412	F:RNA binding; F:structural constituent of ribosome; P:maturation of LSU-rRNA; C:cytosolic large ribosomal subunit; P:translation
Les.326.1.A1_at	101256830	LOC101256830	uncharacterized LOC101256830	XM_004250219	Solyc11g012290.1.1																			0.00110809	0.353534	-2.82859
Les.3260.1.S1_at	101262710	LOC101262710	ubiquitin-conjugating enzyme E2 7-like	XM_004236705	Solyc04g011430.2.1																0.00114275	0.38346	-2.60783							F:GO:0005524; F:GO:0061630; F:GO:0031625; C:GO:0005737; P:GO:0016567	F:ATP binding; F:ubiquitin protein ligase activity; F:ubiquitin protein ligase binding; C:cytoplasm; P:protein ubiquitination
Les.3263.3.S1_at	101263049	LOC101263049	peptidyl-prolyl cis-trans isomerase CYP20-2, chloroplastic-like	XM_004228380	Solyc01g009990.2.1																0.0168751	0.254249	-3.93316				0.00190712	0.169107	-5.91342	F:GO:0003755; P:GO:0000413; P:GO:0006457	F:peptidyl-prolyl cis-trans isomerase activity; P:protein peptidyl-prolyl isomerization; P:protein folding	EC:5.2.1.8	Peptidylprolyl isomerase
Les.3264.3.S1_at	101261115	LOC101261115	sorting and assembly machinery component 50 homolog B-like	XM_004238130	Solyc04g079270.2.1																0.0396991	0.252059	-3.96732							C:GO:0019867	C:outer membrane
Les.3267.2.S1_at	101266745	LOC101266745	UDP-glucose 4-epimerase 1-like	XM_004245586	Solyc08g080570.2.1							0.00120054	2.37022	2.37022	0.0252632	0.336187	-2.97453				0.042839	0.417228	-2.39677				0.0267811	0.399013	-2.50618	F:GO:0003978; C:GO:0016021; P:GO:0009225; P:GO:0006012; C:GO:0005886; P:GO:0009117	F:UDP-glucose 4-epimerase activity; C:integral component of membrane; P:nucleotide-sugar metabolic process; P:galactose metabolic process; C:plasma membrane; P:nucleotide metabolic process	EC:5.1.3.2	UDP-glucose 4-epimerase
Les.327.1.S1_at	101259171	LOC101259171	root phototropism protein 2-like	XM_004243605	Solyc07g043130.2.1				0.0285518	0.490838	-2.03733				0.00157197	0.359129	-2.78452				0.000430543	0.284604	-3.51366	5.00567e-06	5.47999	5.47999				C:GO:0005634; P:GO:0009638; C:GO:0005737; P:GO:0007165; F:GO:0004871	C:nucleus; P:phototropism; C:cytoplasm; P:signal transduction; F:signal transducer activity
Les.3272.1.S1_at	101246955	LOC101246955	diaminopimelate epimerase, chloroplastic-like	XM_004246697	Solyc09g005700.2.1	0.0331344	17.917	17.917	0.0393347	14.2905	14.2905																			C:GO:0009570; F:GO:0008837; P:GO:0009089	C:chloroplast stroma; F:diaminopimelate epimerase activity; P:lysine biosynthetic process via diaminopimelate	EC:5.1.1.7; EC:5.1.1.10	Diaminopimelate epimerase; Amino-acid racemase
Les.3273.1.S1_at	544067	TPRP-F1	proline rich protein	XM_004243609 /// XM_004243610	Solyc07g043000.2.1							0.0210118	0.148993	-6.71171										0.00279632	0.0794722	-12.583	0.0141157	0.129785	-7.70507	P:GO:0009651; P:GO:0009682; C:GO:0005783; F:GO:0008289; P:GO:0009631; C:GO:0009505; P:GO:0009626; F:GO:0043621; P:GO:0009733; C:GO:0009707; P:GO:0006869; C:GO:0009506; P:GO:0009627; P:GO:0009737; C:GO:0048046; P:GO:0050832; P:GO:0070417; P:GO:0010102	P:response to salt stress; P:induced systemic resistance; C:endoplasmic reticulum; F:lipid binding; P:cold acclimation; C:plant-type cell wall; P:plant-type hypersensitive response; F:protein self-association; P:response to auxin; C:chloroplast outer membrane; P:lipid transport; C:plasmodesma; P:systemic acquired resistance; P:response to abscisic acid; C:apoplast; P:defense response to fungus; P…
Les.3274.3.A1_at	101250268	LOC101250268	selenoprotein K-like	XM_004250283	Solyc11g013100.1.1																						0.0172672	2.09366	2.09366	C:GO:0005789; P:GO:0006816; C:GO:0005794; P:GO:0032469	C:endoplasmic reticulum membrane; P:calcium ion transport; C:Golgi apparatus; P:endoplasmic reticulum calcium ion homeostasis
Les.3276.2.S1_at	101244013	LOC101244013	probable glutathione S-transferase-like	XM_004243144	Solyc07g056490.2.1																0.0205225	0.246755	-4.05261							P:GO:0006803; P:GO:0009407; C:GO:0005737; P:GO:0006749; F:GO:0004364	P:obsolete glutathione conjugation reaction; P:toxin catabolic process; C:cytoplasm; P:glutathione metabolic process; F:glutathione transferase activity	EC:2.5.1.18	Glutathione transferase
Les.3286.1.S1_at	101248695	CHRDi	inducible plastid-lipid associated protein	NM_001279340//	Solyc07g064600.2.1							0.0342894	0.169882	-5.88642																C:GO:0009570; F:GO:1904012; P:GO:0009097; F:GO:0046914; P:GO:1902074; F:GO:1904013; C:GO:0005773; P:GO:0009636; C:GO:0009579; C:GO:0070062; P:GO:0046360; P:GO:0001822; C:GO:0005829; F:GO:0016892; P:GO:0033993; P:GO:0017148; P:GO:0030324; P:GO:0090502; F:GO:0042803; F:GO:0036041; C:GO:0009941; P:GO:0046686; P:GO:0007420; F:GO:0044822; C:GO:0005634; C:GO:0005777; P:GO:0006449; C:GO:0005739; P:GO:00…	C:chloroplast stroma; F:platinum binding; P:isoleucine biosynthetic process; F:transition metal ion binding; P:response to salt; F:xenon atom binding; C:vacuole; P:response to toxic substance; C:thylakoid; C:extracellular exosome; P:2-oxobutyrate biosynthetic process; P:kidney development; C:cytosol; F:endoribonuclease activity, producing 3'-phosphomonoesters; P:response to lipid; P:negative regu…	EC:3.1.31; EC:3.1.27	Acting on ester bonds; Acting on ester bonds
Les.3287.1.S1_at	101261284	LOC101261284	ferredoxin--NADP reductase, leaf-type isozyme, chloroplastic-like	XM_004232447	Solyc02g083810.2.1																						0.000144071	0.465605	-2.14774	C:GO:0009570; C:GO:0009941; F:GO:0045157; F:GO:0008266; F:GO:0004324; P:GO:0009767; C:GO:0009535; F:GO:0000166; P:GO:0006118; C:GO:0031977; F:GO:0045156; C:GO:0048046; C:GO:0016021	C:chloroplast stroma; C:chloroplast envelope; F:electron transporter, transferring electrons within the noncyclic electron transport pathway of photosynthesis activity; F:poly(U) RNA binding; F:ferredoxin-NADP+ reductase activity; P:photosynthetic electron transport chain; C:chloroplast thylakoid membrane; F:nucleotide binding; P:obsolete electron transport; C:thylakoid lumen; F:electron transpor…	EC:1.18.1; EC:1.18.1.2	Acting on iron-sulfur proteins as donors; Ferredoxin--NADP(+) reductase
Les.3289.1.S1_at	543873	GABA-TP1	gamma-aminobutyrate transaminase subunit precursor isozyme 1	NM_001247407	Solyc07g043310.2.1							0.0475526	2.14935	2.14935							0.00140101	4.05133	4.05133				0.000167041	5.20757	5.20757	F:GO:0030170; F:GO:0042802; F:GO:0008483; C:GO:0005739	F:pyridoxal phosphate binding; F:identical protein binding; F:transaminase activity; C:mitochondrion
Les.3290.3.S1_at	101265236	LOC101265236	glutamate--glyoxylate aminotransferase 2-like	XM_004239073	Solyc05g013380.2.1																0.0265187	0.141958	-7.04435				0.0222197	0.146233	-6.83841	C:GO:0009570; F:GO:0030170; F:GO:0004021; P:GO:0009853; P:GO:0006563; P:GO:0006531; F:GO:0008453; P:GO:0009058; F:GO:0047958; P:GO:0042853; P:GO:0006544; P:GO:0006566; C:GO:0005777; C:GO:0005829; P:GO:0015976	C:chloroplast stroma; F:pyridoxal phosphate binding; F:L-alanine:2-oxoglutarate aminotransferase activity; P:photorespiration; P:L-serine metabolic process; P:aspartate metabolic process; F:alanine-glyoxylate transaminase activity; P:biosynthetic process; F:glycine:2-oxoglutarate aminotransferase activity; P:L-alanine catabolic process; P:glycine metabolic process; P:threonine metabolic process; …	EC:2.6.1.44; EC:2.6.1.12; EC:2.6.1.2; EC:2.6.1.4	Alanine--glyoxylate transaminase; Alanine--oxo-acid transaminase; Alanine transaminase; Glycine transaminase
Les.3291.2.A1_at	101267852	LOC101267852	NADH dehydrogenase [ubiquinone] 1 beta subcomplex subunit 9	XM_004230917	Solyc01g110390.2.1																0.0169959	2.13004	2.13004							P:GO:0005975; C:GO:0005747; C:GO:0031966; C:GO:0045271; P:GO:0006120; C:GO:0005739; C:GO:0005774	P:carbohydrate metabolic process; C:mitochondrial respiratory chain complex I; C:mitochondrial membrane; C:respiratory chain complex I; P:mitochondrial electron transport, NADH to ubiquinone; C:mitochondrion; C:vacuolar membrane
Les.3293.1.S1_at	101249437	LOC101249437	ATP-dependent Clp protease ATP-binding subunit clpA homolog CD4B, chloroplastic-like	XM_004252232	Solyc12g042060.1.1																0.00587776	0.290117	-3.44689				0.0157735	0.364006	-2.74721	F:GO:0005524; C:GO:0009507; P:GO:0006508; F:GO:0008233	F:ATP binding; C:chloroplast; P:proteolysis; F:peptidase activity
Les.3297.1.S1_at	101268669	LOC101268669	chlorophyll a-b binding protein P4, chloroplastic-like	XM_004235966	Solyc03g115900.2.1							0.0161227	0.385456	-2.59433							0.00292422	0.276456	-3.61721				0.000265012	0.204666	-4.886	F:GO:0046872; F:GO:0031409; C:GO:0009941; C:GO:0016021; C:GO:0009522; P:GO:0018298; F:GO:0016168; C:GO:0010287; P:GO:0009416; P:GO:0009768; C:GO:0009535	F:metal ion binding; F:pigment binding; C:chloroplast envelope; C:integral component of membrane; C:photosystem I; P:protein-chromophore linkage; F:chlorophyll binding; C:plastoglobule; P:response to light stimulus; P:photosynthesis, light harvesting in photosystem I; C:chloroplast thylakoid membrane
Les.3299.2.A1_s_at	544271	ARG2	arginase 2	NM_001246922	Solyc01g091170.2.1																			0.00479078	8.38262	8.38262	0.00688596	7.81758	7.81758	F:GO:0016813; F:GO:0046872; P:GO:0006807; F:GO:0016787	F:hydrolase activity, acting on carbon-nitrogen (but not peptide) bonds, in linear amidines; F:metal ion binding; P:nitrogen compound metabolic process; F:hydrolase activity
Les.33.1.S1_at	543604	LOC543604	phantastica	NM_001247347	Solyc09g010840.1.1																			0.00313827	0.36227	-2.76037				C:GO:0005634; F:GO:0003677; P:GO:0006351; P:GO:0010338	C:nucleus; F:DNA binding; P:transcription, DNA-templated; P:leaf formation
Les.3300.1.S1_at	543564	AN34	annexin p34	NM_001247175	Solyc04g073990.2.1																0.0135136	2.55982	2.55982	0.00227221	3.09609	3.09609				C:GO:0009570; F:GO:0008270; F:GO:0042803; P:GO:0006970; C:GO:0005774; C:GO:0005886; C:GO:0009579; F:GO:0005544; F:GO:0004601; F:GO:0005524; P:GO:0006979; C:GO:0009506; P:GO:0009737; F:GO:0005507; F:GO:0005509; P:GO:0006804; C:GO:0005618; C:GO:0005739; C:GO:0048046; P:GO:0070588; P:GO:0071435; P:GO:0098869; C:GO:0005829; P:GO:0055114	C:chloroplast stroma; F:zinc ion binding; F:protein homodimerization activity; P:response to osmotic stress; C:vacuolar membrane; C:plasma membrane; C:thylakoid; F:calcium-dependent phospholipid binding; F:peroxidase activity; F:ATP binding; P:response to oxidative stress; C:plasmodesma; P:response to abscisic acid; F:copper ion binding; F:calcium ion binding; P:obsolete peroxidase reaction; C:ce…	EC:1.11.1.7	Peroxidase
Les.3301.3.S1_at	101259184	LOC101259184	syntaxin-22-like	XM_004245900	Solyc08g076540.2.1																0.000188426	0.419157	-2.38574							P:GO:0006906; P:GO:0048278; C:GO:0016021; F:GO:0005484; C:GO:0012505; C:GO:0031201; F:GO:0000149; P:GO:0006886	P:vesicle fusion; P:vesicle docking; C:integral component of membrane; F:SNAP receptor activity; C:endomembrane system; C:SNARE complex; F:SNARE binding; P:intracellular protein transport
Les.3303.1.S1_at	101254392	LOC101254392	uncharacterized LOC101254392	XM_004240980	Solyc06g053810.2.1																0.00057847	0.419993	-2.38099	0.000319487	0.422904	-2.3646				C:GO:0005634; F:GO:0005524; C:GO:0016021; P:GO:0016310; F:GO:0016301; F:GO:0016787	C:nucleus; F:ATP binding; C:integral component of membrane; P:phosphorylation; F:kinase activity; F:hydrolase activity
Les.3306.1.S1_at	101248722	LOC101248722	30S ribosomal protein S10, chloroplastic-like	XM_004248324	Solyc10g006030.2.1																			0.000632972	0.481966	-2.07484	3.76822e-05	0.383276	-2.60909	F:GO:0003723; F:GO:0003735; C:GO:0005739; P:GO:0042254; C:GO:0015935; P:GO:0006412	F:RNA binding; F:structural constituent of ribosome; C:mitochondrion; P:ribosome biogenesis; C:small ribosomal subunit; P:translation
Les.3312.2.S1_at	101251304	LOC101251304	subtilisin-like protease-like	XM_004243656	Solyc07g041970.2.1																0.0383915	0.27249	-3.66985				0.00656917	0.185137	-5.4014	C:GO:0009506; P:GO:0006508; F:GO:0004252; C:GO:0005794; C:GO:0009505	C:plasmodesma; P:proteolysis; F:serine-type endopeptidase activity; C:Golgi apparatus; C:plant-type cell wall	EC:3.4.21	Acting on peptide bonds (peptidases)
Les.3318.3.S1_at	101256090	LOC101256090	serine hydroxymethyltransferase 1-like	XM_004239801	Solyc05g053810.2.1																0.00764652	0.141502	-7.06703				0.0359434	0.242522	-4.12333	F:GO:0030170; C:GO:0009506; P:GO:0006563; C:GO:0005829; F:GO:0004372; P:GO:0035999; F:GO:0008168; C:GO:0005886; P:GO:0006544; P:GO:0032259	F:pyridoxal phosphate binding; C:plasmodesma; P:L-serine metabolic process; C:cytosol; F:glycine hydroxymethyltransferase activity; P:tetrahydrofolate interconversion; F:methyltransferase activity; C:plasma membrane; P:glycine metabolic process; P:methylation	EC:2.1.2.1	Glycine hydroxymethyltransferase
Les.3319.3.S1_at	101245519	LOC101245519	probable allantoinase 1-like	XM_004232812 /// XM_004232813	Solyc02g078400.2.1																			0.0230901	4.53838	4.53838	0.00281636	8.32204	8.32204	F:GO:0008270; P:GO:0006145; C:GO:0005783; F:GO:0004038; P:GO:0000256; P:GO:0010136; F:GO:0050897	F:zinc ion binding; P:purine nucleobase catabolic process; C:endoplasmic reticulum; F:allantoinase activity; P:allantoin catabolic process; P:ureide catabolic process; F:cobalt ion binding	EC:3.5.2.5	Allantoinase
Les.3320.3.S1_at	101252327	LOC101252327	protein FRIGIDA-like	XM_004247306	Solyc09g076050.2.1																0.00354371	0.0831875	-12.021				0.046839	0.217205	-4.60395	P:GO:0007275; P:GO:0009908; P:GO:0030154	P:multicellular organism development; P:flower development; P:cell differentiation
Les.3322.3.S1_at	101244176	LOC101244176	magnesium-chelatase subunit ChlH, chloroplastic	XM_004236562	Solyc04g015750.2.1							0.0149113	0.352181	-2.83945	0.0339821	0.193517	-5.16749				2.95933e-05	0.113677	-8.79682				2.29697e-05	0.121037	-8.26195	P:GO:0015995; C:GO:0005739; C:GO:0010007; F:GO:0016851	P:chlorophyll biosynthetic process; C:mitochondrion; C:magnesium chelatase complex; F:magnesium chelatase activity	EC:6.6.1.1	Magnesium chelatase
Les.3324.1.S1_at	101249306	LOC101249306	triose phosphate/phosphate translocator, chloroplastic-like	XM_004248069 /// XM_004248070	Solyc10g008980.2.1																						0.000198289	0.468296	-2.1354	C:GO:0031969; C:GO:0016021; P:GO:0006810; F:GO:0005215	C:chloroplast membrane; C:integral component of membrane; P:transport; F:transporter activity
Les.3327.2.S1_at	101247708	LOC101247708	uncharacterized LOC101247708	XM_004253068	Solyc12g094710.1.1																0.00264472	0.33061	-3.02471				0.00247327	0.345629	-2.89328	F:GO:0003677; C:GO:0005829	F:DNA binding; C:cytosol
Les.3328.1.A1_at	101249116	LOC101249116	malonyl-CoA-acyl carrier protein transacylase, mitochondrial-like	XM_004228580	Solyc01g006980.2.1																0.0206393	2.48133	2.48133							C:GO:0009570; F:GO:0004314; C:GO:0009507; C:GO:0005835; P:GO:0042967; F:GO:0003824; P:GO:0006633	C:chloroplast stroma; F:[acyl-carrier-protein] S-malonyltransferase activity; C:chloroplast; C:fatty acid synthase complex; P:acyl-carrier-protein biosynthetic process; F:catalytic activity; P:fatty acid biosynthetic process	EC:2.3.1.85; EC:2.3.1.39	Fatty-acid synthase; [Acyl-carrier-protein] S-malonyltransferase
Les.333.2.S1_at	101257149	LOC101257149	uncharacterized LOC101257149	XM_004234999	Solyc03g079940.2.1																0.00790265	0.400931	-2.4942				0.0103662	0.433995	-2.30417	P:GO:0071806; F:GO:0015266; C:GO:0009941; C:GO:0016021; P:GO:0033365	P:protein transmembrane transport; F:protein channel activity; C:chloroplast envelope; C:integral component of membrane; P:protein localization to organelle
Les.3330.2.S1_at	101260248	LOC101260248	fasciclin-like arabinogalactan protein 2-like	XM_004243525	Solyc07g045440.1.1																0.0161612	0.2174	-4.59982							C:GO:0016021	C:integral component of membrane
Les.3332.1.S1_at	101252603	LOC101252603	uncharacterized LOC101252603	XM_004243584	Solyc07g043570.2.1																			0.000575882	0.473428	-2.11225				F:GO:0016491; C:GO:0009941; P:GO:0055114; C:GO:0010287; C:GO:0009535	F:oxidoreductase activity; C:chloroplast envelope; P:oxidation-reduction process; C:plastoglobule; C:chloroplast thylakoid membrane
Les.3333.1.S1_at	101248251	LOC101248251	40S ribosomal protein S5-2-like	XM_004249107	Solyc10g078620.1.1																0.0294136	0.383858	-2.60513							F:GO:0003735; C:GO:0022627; F:GO:0003729; P:GO:0000028; F:GO:0019843; P:GO:0006412	F:structural constituent of ribosome; C:cytosolic small ribosomal subunit; F:mRNA binding; P:ribosomal small subunit assembly; F:rRNA binding; P:translation
Les.3334.2.S1_at	100316879	LOC100316879	calcium-dependent protein kinase	NM_001247678	Solyc03g033540.2.1							0.00332172	2.364	2.364							0.0134628	2.09094	2.09094	0.0162774	2.96113	2.96113				P:GO:0046777; F:GO:0004683; P:GO:0009069; C:GO:0005886; F:GO:0009931; C:GO:0005634; F:GO:0005524; F:GO:0005516; P:GO:0009738; C:GO:0005737; F:GO:0005509; P:GO:0018105; P:GO:0035556	P:protein autophosphorylation; F:calmodulin-dependent protein kinase activity; P:serine family amino acid metabolic process; C:plasma membrane; F:calcium-dependent protein serine/threonine kinase activity; C:nucleus; F:ATP binding; F:calmodulin binding; P:abscisic acid-activated signaling pathway; C:cytoplasm; F:calcium ion binding; P:peptidyl-serine phosphorylation; P:intracellular signal transd…	EC:2.7.11; EC:2.7.11.17	Transferring phosphorus-containing groups; Calcium/calmodulin-dependent protein kinase
Les.3337.3.S1_at	101253833	LOC101253833	soluble inorganic pyrophosphatase 1, chloroplastic-like	XM_004230608	Solyc01g106430.2.1																0.0187002	0.469281	-2.13092				0.00897129	0.443492	-2.25483	F:GO:0000287; F:GO:0004427; P:GO:0006119; C:GO:0005737	F:magnesium ion binding; F:inorganic diphosphatase activity; P:oxidative phosphorylation; C:cytoplasm	EC:3.6.1.1	Inorganic diphosphatase
Les.3342.3.S1_at	101246251	LOC101246251	vacuolar protein sorting-associated protein 18 homolog	XM_004240293	Solyc06g005080.2.1																0.0298766	2.02368	2.02368				0.00527903	2.44634	2.44634	P:GO:0007040; P:GO:0016192; C:GO:0005768; P:GO:0035542; P:GO:0007032; P:GO:0006904; P:GO:0006886; F:GO:0030674; C:GO:0030897	P:lysosome organization; P:vesicle-mediated transport; C:endosome; P:regulation of SNARE complex assembly; P:endosome organization; P:vesicle docking involved in exocytosis; P:intracellular protein transport; F:protein binding, bridging; C:HOPS complex
Les.3343.2.S1_at	101266280	LOC101266280	F-box/kelch-repeat protein At2g44130-like	XM_004249248 /// XM_004249249	Solyc10g080610.1.1										0.0158803	0.263733	-3.79172				0.0173597	0.0844673	-11.8389							F:GO:0004842; C:GO:0031463; P:GO:0016567	F:ubiquitin-protein transferase activity; C:Cul3-RING ubiquitin ligase complex; P:protein ubiquitination
Les.3348.1.S1_at	101247711	LOC101247711	uncharacterized LOC101247711	XM_004235980	Solyc03g116590.2.1																0.00370445	2.51034	2.51034	0.00436895	2.32197	2.32197				C:GO:0016020; C:GO:0016021	C:membrane; C:integral component of membrane
Les.335.1.S1_at	543603	Wfi1	whitefly-induced gp91-phox	NM_001247342	Solyc03g117980.2.1							0.00371669	2.18354	2.18354							0.00558832	2.17372	2.17372				0.00597917	2.07957	2.07957	F:GO:0004601; F:GO:0050664; P:GO:0006979; F:GO:0005509; P:GO:0006804; C:GO:0016021; P:GO:0098869; P:GO:0055114	F:peroxidase activity; F:oxidoreductase activity, acting on NAD(P)H, oxygen as acceptor; P:response to oxidative stress; F:calcium ion binding; P:obsolete peroxidase reaction; C:integral component of membrane; P:cellular oxidant detoxification; P:oxidation-reduction process	EC:1.11.1.7	Peroxidase
Les.3351.1.S1_at	101264607	LOC101264607	kelch repeat-containing protein At3g27220-like	XM_004235457	Solyc03g123910.2.1																0.0348418	0.310505	-3.22056							C:GO:0005802; C:GO:0005768; C:GO:0016021	C:trans-Golgi network; C:endosome; C:integral component of membrane
Les.3354.2.S1_at	101257709	LOC101257709	ribosome biogenesis protein NSA2 homolog	XM_004247941	Solyc09g098360.2.1																0.00739735	0.423453	-2.36154				0.00120393	0.35693	-2.80167	P:GO:0000460; P:GO:0000470; C:GO:0005730; C:GO:0030687	P:maturation of 5.8S rRNA; P:maturation of LSU-rRNA; C:nucleolus; C:preribosome, large subunit precursor
Les.3358.3.S1_at	543807	adc1	arginine decarboxylase	NM_001247135	Solyc10g054440.1.1	0.00241892	0.191031	-5.23475							0.00216799	0.459664	-2.1755	0.00728788	0.27861	-3.58925										P:GO:0006527; F:GO:0003824; F:GO:0008792; P:GO:0006560; P:GO:0008295; F:GO:0016829; F:GO:0016831	P:arginine catabolic process; F:catalytic activity; F:arginine decarboxylase activity; P:proline metabolic process; P:spermidine biosynthetic process; F:lyase activity; F:carboxy-lyase activity	EC:4.1.1.19	Arginine decarboxylase
Les.336.1.A1_at	101246522	LOC101246522	4-hydroxybenzoate polyprenyltransferase, mitochondrial	XM_004236059	Solyc03g114300.2.1																0.0369923	2.13479	2.13479				0.0152867	2.35167	2.35167	F:GO:0002083; F:GO:0002094; P:GO:0008299; P:GO:0006744; C:GO:0005743; C:GO:0031305; F:GO:0004659; C:GO:0005739; C:GO:0016020; C:GO:0016021; F:GO:0016740; F:GO:0047293; F:GO:0016765	F:4-hydroxybenzoate decaprenyltransferase activity; F:polyprenyltransferase activity; P:isoprenoid biosynthetic process; P:ubiquinone biosynthetic process; C:mitochondrial inner membrane; C:integral component of mitochondrial inner membrane; F:prenyltransferase activity; C:mitochondrion; C:membrane; C:integral component of membrane; F:transferase activity; F:4-hydroxybenzoate nonaprenyltransferas…	EC:2.5.1.39	4-hydroxybenzoate polyprenyltransferase
Les.3365.3.S1_at	101245989	LOC101245989	zinc finger CCCH domain-containing protein 30-like	XM_004229579	Solyc01g087160.2.1																0.0454819	0.196852	-5.07997							F:GO:0046872	F:metal ion binding
Les.3369.2.S1_at	101266739	LOC101266739	ATP-dependent zinc metalloprotease FTSH 2, chloroplastic-like	XM_004243218	Solyc07g055320.2.1																0.0145001	0.197397	-5.06594							C:GO:0009941; F:GO:0004176; F:GO:0004222; P:GO:0006510; C:GO:0009535; F:GO:0005524; C:GO:0005739; P:GO:0006508; C:GO:0016021; P:GO:0010027; P:GO:0010206; P:GO:0010205; P:GO:0010304	C:chloroplast envelope; F:ATP-dependent peptidase activity; F:metalloendopeptidase activity; P:obsolete ATP-dependent proteolysis; C:chloroplast thylakoid membrane; F:ATP binding; C:mitochondrion; P:proteolysis; C:integral component of membrane; P:thylakoid membrane organization; P:photosystem II repair; P:photoinhibition; P:PSII associated light-harvesting complex II catabolic process	EC:3.4.24; EC:3.6.1.3; EC:3.6.1.15	Acting on peptide bonds (peptidases); Adenosinetriphosphatase; Nucleoside-triphosphate phosphatase
Les.3371.2.S1_at	101248281	LOC101248281	RWD domain-containing protein 1-like	XM_004235573	Solyc03g121310.2.1																0.0449109	0.431433	-2.31786							C:GO:0005844; P:GO:0002181	C:polysome; P:cytoplasmic translation
Les.3372.1.S1_at	101261328	LOC101261328	probable peptide transporter At1g52190-like	XM_004238651	Solyc05g005950.2.1																			0.000261868	2.67404	2.67404				P:GO:0006857; C:GO:0016021; F:GO:0005215	P:oligopeptide transport; C:integral component of membrane; F:transporter activity
Les.3374.1.S1_at	101257242	LOC101257242	ketol-acid reductoisomerase, chloroplastic-like	XM_004251752	Solyc12g010840.1.1																0.0135068	0.116362	-8.59384				0.00946031	0.114428	-8.73909	C:GO:0009570; P:GO:0009097; P:GO:0015940; P:GO:0009099; P:GO:0009098; C:GO:0009941; P:GO:0046686; F:GO:0004455; F:GO:0005507; C:GO:0005618; C:GO:0005739; C:GO:0048046; C:GO:0005829; P:GO:0055114; F:GO:0016853	C:chloroplast stroma; P:isoleucine biosynthetic process; P:pantothenate biosynthetic process; P:valine biosynthetic process; P:leucine biosynthetic process; C:chloroplast envelope; P:response to cadmium ion; F:ketol-acid reductoisomerase activity; F:copper ion binding; C:cell wall; C:mitochondrion; C:apoplast; C:cytosol; P:oxidation-reduction process; F:isomerase activity	EC:1.1.1.86	Ketol-acid reductoisomerase (NADP(+))
Les.3375.1.S1_at	104647958	LOC104647958	ferritin-1, chloroplastic	XM_010323864	Solyc06g050980.2.1																			0.0106921	0.491613	-2.03412	0.000121155	0.299214	-3.34209	P:GO:0006879; P:GO:0015994; C:GO:0009507; F:GO:0008199; P:GO:0006826; P:GO:0055114; F:GO:0004322	P:cellular iron ion homeostasis; P:chlorophyll metabolic process; C:chloroplast; F:ferric iron binding; P:iron ion transport; P:oxidation-reduction process; F:ferroxidase activity	EC:1.16.3.1; EC:1.16.3	Ferroxidase; Oxidizing metal ions
Les.3376.1.A1_at	778334	CIP1	CONSTANS interacting protein 1	NM_001247240	Solyc06g073180.2.1																			2.09396e-06	2.66487	2.66487				C:GO:0005634; F:GO:0008270; P:GO:0009640; F:GO:0000989; P:GO:0006355; P:GO:0016310; F:GO:0016301	C:nucleus; F:zinc ion binding; P:photomorphogenesis; F:transcription factor activity, transcription factor binding; P:regulation of transcription, DNA-templated; P:phosphorylation; F:kinase activity
Les.3378.2.S1_at	101253131	LOC101253131	malate dehydrogenase, cytoplasmic-like	XM_004247686	Solyc09g090140.2.1																0.0397542	0.11086	-9.02036				0.0480223	0.460841	-2.16995	P:GO:0005975; F:GO:0030060; P:GO:0006108; C:GO:0005737; P:GO:0046487; P:GO:0019643; P:GO:0006090	P:carbohydrate metabolic process; F:L-malate dehydrogenase activity; P:malate metabolic process; C:cytoplasm; P:glyoxylate metabolic process; P:reductive tricarboxylic acid cycle; P:pyruvate metabolic process	EC:1.1.1.37	Malate dehydrogenase
Les.3379.1.S1_at	543714	DREB3	dehydration-responsive element binding protein 3	NM_001247778	Solyc04g072900.1.1										0.00137494	0.451799	-2.21337													C:GO:0005634; F:GO:0003677; C:GO:0005667; F:GO:0003700; P:GO:0006355; P:GO:0006355	C:nucleus; F:DNA binding; C:transcription factor complex; F:transcription factor activity, sequence-specific DNA binding; P:regulation of transcription, DNA-templated; P:regulation of transcription, DNA-templated
Les.3382.3.S1_at	101259104	LOC101259104	uncharacterized LOC101259104	XM_004249891	Solyc11g006470.1.1													0.0138228	0.386311	-2.58858										F:GO:0008375; C:GO:0016021	F:acetylglucosaminyltransferase activity; C:integral component of membrane
Les.3383.1.S1_at	101251259	LOC101251259	4-coumarate--CoA ligase-like 10-like	XM_004234347	Solyc03g025720.2.1							0.0158482	3.27066	3.27066							0.0262678	3.10973	3.10973	0.00205816	4.73973	4.73973				F:GO:0008756; P:GO:0006744	F:o-succinylbenzoate-CoA ligase activity; P:ubiquinone biosynthetic process	EC:6.2.1.26	o-succinylbenzoate--CoA ligase
Les.3384.2.A1_at	101255136	LOC101255136	1,2-dihydroxy-3-keto-5-methylthiopentene dioxygenase 1-like	XM_004247549	Solyc09g082630.2.1																			0.000817348	2.17625	2.17625	0.000549268	2.28119	2.28119	F:GO:0051213; P:GO:0009086; C:GO:0005634; C:GO:0005737; F:GO:0016491; F:GO:0046872; F:GO:0005506; P:GO:0019509; F:GO:0010309; P:GO:0008652; P:GO:0055114	F:dioxygenase activity; P:methionine biosynthetic process; C:nucleus; C:cytoplasm; F:oxidoreductase activity; F:metal ion binding; F:iron ion binding; P:L-methionine salvage from methylthioadenosine; F:acireductone dioxygenase [iron(II)-requiring] activity; P:cellular amino acid biosynthetic process; P:oxidation-reduction process	EC:1.13.11; EC:1.13.11.54	Acting on single donors with incorporation of molecular oxygen (oxygenases). The oxygen incorporated need not be derived from O(2); Acireductone dioxygenase (Fe(2+)-requiring)
Les.3385.1.A1_at	101247783	LOC101247783	mitochondrial import receptor subunit TOM20-like	XM_004233245	Solyc02g068130.2.1																0.000186771	2.05121	2.05121							P:GO:0045040; C:GO:0016021; C:GO:0005742	P:protein import into mitochondrial outer membrane; C:integral component of membrane; C:mitochondrial outer membrane translocase complex
Les.3387.2.S1_at	101263261	LOC101263261	actin-58-like	XM_004249238	Solyc10g080500.1.1																0.0221851	0.244478	-4.09034				0.0191332	0.252098	-3.9667	F:GO:0005524; C:GO:0005615; C:GO:0005856; C:GO:0070062; C:GO:0005925; C:GO:0097433; C:GO:0005886; C:GO:0030027	F:ATP binding; C:extracellular space; C:cytoskeleton; C:extracellular exosome; C:focal adhesion; C:dense body; C:plasma membrane; C:lamellipodium
Les.3390.1.S1_at	101250878	LOC101250878	28 kDa ribonucleoprotein, chloroplastic-like	XM_004236243	Solyc03g111840.2.1																			1.94766e-05	0.335474	-2.98086	1.80701e-05	0.326938	-3.05869	F:GO:0000166; C:GO:0009507; F:GO:0003723; C:GO:0030529; P:GO:0006397	F:nucleotide binding; C:chloroplast; F:RNA binding; C:intracellular ribonucleoprotein complex; P:mRNA processing
Les.3392.1.A1_at	101245387	LOC101245387	heat shock protein STI-like	XM_004245683	Solyc08g079170.2.1																0.0448536	0.340368	-2.93799	2.4701e-05	2.302	2.302				P:GO:0010286; P:GO:0009611; P:GO:0009644; P:GO:0046686; P:GO:0042542; P:GO:0006986; C:GO:0005886; P:GO:0051026; C:GO:0005634; P:GO:0034605; P:GO:0051131; C:GO:0005829; F:GO:0051879; P:GO:0070417; F:GO:0070678	P:heat acclimation; P:response to wounding; P:response to high light intensity; P:response to cadmium ion; P:response to hydrogen peroxide; P:response to unfolded protein; C:plasma membrane; P:chiasma assembly; C:nucleus; P:cellular response to heat; P:chaperone-mediated protein complex assembly; C:cytosol; F:Hsp90 protein binding; P:cellular response to cold; F:preprotein binding
Les.3394.1.S1_at	101256571	LOC101256571	TOM1-like protein 2-like	XM_004235264 /// XM_004235265	Solyc03g097070.2.1																6.14531e-05	2.72961	2.72961				0.000649965	2.15685	2.15685	C:GO:0005829; P:GO:0006886; C:GO:0005886	C:cytosol; P:intracellular protein transport; C:plasma membrane
Les.3396.1.A1_at	101248835	LOC101248835	uncharacterized LOC101248835	XM_004232912	Solyc02g077080.2.1	0.044246	0.413485	-2.41847													0.0489588	2.24418	2.24418				0.00504418	3.1585	3.1585	P:GO:0042967; P:GO:0006520; C:GO:0005794; P:GO:0071554; F:GO:0016597; F:GO:0016413; F:GO:0016743	P:acyl-carrier-protein biosynthetic process; P:cellular amino acid metabolic process; C:Golgi apparatus; P:cell wall organization or biogenesis; F:amino acid binding; F:O-acetyltransferase activity; F:carboxyl- or carbamoyltransferase activity
Les.3397.2.A1_at	101261997	LOC101261997	trypsin inhibitor A-like	XM_004235363	Solyc03g098720.2.1										0.0451041	4.46671	4.46671							0.0367047	4.79192	4.79192	0.0108533	7.35233	7.35233	F:GO:0004866; P:GO:0010951	F:endopeptidase inhibitor activity; P:negative regulation of endopeptidase activity
Les.3401.1.A1_at	101268416	LOC101268416	FAM10 family protein At4g22670-like	XM_004245675	Solyc08g079260.2.1																						4.5589e-07	2.19898	2.19898	F:GO:0046983	F:protein dimerization activity
Les.3403.2.S1_at	101262662	LOC101262662	probable protein phosphatase 2C 73-like	XM_004230220	Solyc01g100040.2.1																0.000284162	0.299423	-3.33976							F:GO:0004722; C:GO:0008287; P:GO:0006470	F:protein serine/threonine phosphatase activity; C:protein serine/threonine phosphatase complex; P:protein dephosphorylation	EC:3.1.3.16; EC:3.1.3.41	Protein-serine/threonine phosphatase; 4-nitrophenylphosphatase
Les.3406.1.S1_at	544148	CHI9	chitinase	NM_001247474	Solyc10g055800.1.1	0.0315589	0.357034	-2.80085				0.00124317	4.53378	4.53378	0.0191291	0.362608	-2.7578				0.000383359	6.02031	6.02031	1.34152e-06	13.9041	13.9041				F:GO:0004568; P:GO:0009607; P:GO:0016998; F:GO:0008061; P:GO:0000272; P:GO:0006032; C:GO:0005618; C:GO:0005576; P:GO:0009626; C:GO:0005773	F:chitinase activity; P:response to biotic stimulus; P:cell wall macromolecule catabolic process; F:chitin binding; P:polysaccharide catabolic process; P:chitin catabolic process; C:cell wall; C:extracellular region; P:plant-type hypersensitive response; C:vacuole	EC:3.2.1.14	Chitinase
Les.3407.2.S1_at	101251245	LOC101251245	uncharacterized LOC101251245	XM_004250595	Solyc11g030380.1.1	0.0135713	0.390747	-2.5592							0.0335352	0.491562	-2.03433				0.0172192	0.42203	-2.3695
Les.3408.1.S1_at	544123	PR1b1	pathogenesis-related leaf protein 6	NM_001247385	Solyc00g174330.2.1							0.000948867	33.4801	33.4801							0.00763875	17.1094	17.1094	2.32516e-05	125.212	125.212				P:GO:0031640; C:GO:0005576; P:GO:0050832	P:killing of cells of other organism; C:extracellular region; P:defense response to fungus
Les.3409.2.S1_at	101257010	LOC101257010	fasciclin-like arabinogalactan protein 10-like	XM_004229780	Solyc01g091530.2.1																0.00800825	0.0464591	-21.5243				0.0222111	0.0849931	-11.7657	C:GO:0016021	C:integral component of membrane
Les.3414.1.S1_at	101252619	LOC101252619	probable phytol kinase 3, chloroplastic-like	XM_004246212	Solyc09g018510.2.1																0.0286709	0.222249	-4.49946							P:GO:0048440; P:GO:0009737; F:GO:0052670; F:GO:0052671; C:GO:0016021; P:GO:0016310; F:GO:0052669; P:GO:0016487; F:GO:0016301	P:carpel development; P:response to abscisic acid; F:geraniol kinase activity; F:geranylgeraniol kinase activity; C:integral component of membrane; P:phosphorylation; F:CTP:2-trans,-6-trans-farnesol kinase activity; P:farnesol metabolic process; F:kinase activity
Les.3415.2.S1_at	101257377	LOC101257377	4-hydroxyphenylpyruvate dioxygenase-like	XM_004240123	Solyc05g041200.2.1													0.0418776	0.374795	-2.66812										P:GO:0006559; C:GO:0005737; F:GO:0003868; F:GO:0046872; P:GO:0006572; P:GO:0055114	P:L-phenylalanine catabolic process; C:cytoplasm; F:4-hydroxyphenylpyruvate dioxygenase activity; F:metal ion binding; P:tyrosine catabolic process; P:oxidation-reduction process	EC:1.13.11; EC:1.13.11.27	Acting on single donors with incorporation of molecular oxygen (oxygenases). The oxygen incorporated need not be derived from O(2); 4-hydroxyphenylpyruvate dioxygenase
Les.3415.3.S1_at	101268314	LOC101268314	calvin cycle protein CP12-2, chloroplastic-like	XM_004229345	Solyc01g079470.2.1																			0.000111431	0.313945	-3.18527	0.00321704	0.43571	-2.2951	C:GO:0009570; P:GO:0080153; C:GO:0009941; C:GO:0043234; P:GO:0044238; P:GO:0009416; P:GO:0044237; P:GO:0009744; F:GO:0005515; P:GO:0034605; P:GO:0071454; P:GO:0070417; P:GO:0071704	C:chloroplast stroma; P:negative regulation of reductive pentose-phosphate cycle; C:chloroplast envelope; C:protein complex; P:primary metabolic process; P:response to light stimulus; P:cellular metabolic process; P:response to sucrose; F:protein binding; P:cellular response to heat; P:cellular response to anoxia; P:cellular response to cold; P:organic substance metabolic process
Les.3418.3.S1_at	101255117	LOC101255117	peroxisomal 2,4-dienoyl-CoA reductase SPS19-like	XM_004243507 /// XM_004243508	Solyc07g047800.2.1							0.0026606	2.08486	2.08486							0.00013115	5.73016	5.73016	0.0370315	2.18993	2.18993	0.00200408	3.52254	3.52254	C:GO:0005777	C:peroxisome
Les.3421.2.S1_at	101262823	LOC101262823	60S ribosomal protein L5-like	XM_004242408	Solyc06g082870.2.1																						0.0436041	0.424815	-2.35397	F:GO:0003735; F:GO:0008097; C:GO:0022625; P:GO:0000027; P:GO:0006412	F:structural constituent of ribosome; F:5S rRNA binding; C:cytosolic large ribosomal subunit; P:ribosomal large subunit assembly; P:translation
Les.3429.2.S1_at	101262275	LOC101262275	histone H3.3-like	XM_004250067	Solyc11g010230.1.1																0.0106625	0.337043	-2.96698							C:GO:0005634; F:GO:0046982; F:GO:0031492; C:GO:0000786; P:GO:0006334	C:nucleus; F:protein heterodimerization activity; F:nucleosomal DNA binding; C:nucleosome; P:nucleosome assembly
Les.3437.2.A1_at	778250	SlFKBP12	peptidyl-prolyl isomerase FKBP12	NM_001246896	Solyc01g105710.2.1																						0.000128959	2.08609	2.08609	F:GO:0003755; C:GO:0005737; F:GO:0005528; P:GO:0061077; P:GO:0000413; F:GO:0016853	F:peptidyl-prolyl cis-trans isomerase activity; C:cytoplasm; F:FK506 binding; P:chaperone-mediated protein folding; P:protein peptidyl-prolyl isomerization; F:isomerase activity	EC:5.2.1.8	Peptidylprolyl isomerase
Les.344.2.S1_at	101266138	LOC101266138	protein SYM1-like	XM_004243216	Solyc07g055340.2.1																0.00693946	0.243765	-4.10232	0.0324647	0.363431	-2.75155	0.00848934	0.271373	-3.68496	C:GO:0009941; C:GO:0016021	C:chloroplast envelope; C:integral component of membrane
Les.3449.1.S1_at	543537	GSH2	glutathione synthetase	NM_001247085	Solyc01g098610.2.1																0.00043886	2.29209	2.29209							F:GO:0000287; F:GO:0005524; C:GO:0009507; F:GO:0042803; F:GO:0043295; P:GO:0006750; C:GO:0005829; F:GO:0004363	F:magnesium ion binding; F:ATP binding; C:chloroplast; F:protein homodimerization activity; F:glutathione binding; P:glutathione biosynthetic process; C:cytosol; F:glutathione synthase activity	EC:6.3.2.3	Glutathione synthase
Les.3450.1.S1_at	543831	LOC543831	GTP cyclohydrolase I	NM_001247212	Solyc06g083230.2.1																			0.000891485	0.498784	-2.00488				F:GO:0005525; F:GO:0008270; F:GO:0042803; P:GO:0006729; C:GO:0005737; F:GO:0003934; P:GO:0035998; P:GO:0046656; P:GO:0046654	F:GTP binding; F:zinc ion binding; F:protein homodimerization activity; P:tetrahydrobiopterin biosynthetic process; C:cytoplasm; F:GTP cyclohydrolase I activity; P:7,8-dihydroneopterin 3'-triphosphate biosynthetic process; P:folic acid biosynthetic process; P:tetrahydrofolate biosynthetic process	EC:3.5.4.16	GTP cyclohydrolase I
Les.3452.1.S1_at	543699	FPP	coiled-coil protein	XM_004250264	Solyc11g012860.1.1																0.00851946	0.400807	-2.49497	0.00388338	0.384768	-2.59897	0.000249773	0.268774	-3.7206	C:GO:0005737	C:cytoplasm
Les.3454.1.S1_at	543832	FLACCA	molybdenum cofactor sulfurase	NM_001247215	Solyc07g066480.2.1																0.0019315	4.43617	4.43617	0.0311981	2.48771	2.48771	0.00253116	3.94614	3.94614	F:GO:0102867; F:GO:0030170; F:GO:0008265; F:GO:0003824; F:GO:0030151; F:GO:0016740; P:GO:0006777; C:GO:0019008	F:molybdenum cofactor sulfurtransferase activity; F:pyridoxal phosphate binding; F:Mo-molybdopterin cofactor sulfurase activity; F:catalytic activity; F:molybdenum ion binding; F:transferase activity; P:Mo-molybdopterin cofactor biosynthetic process; C:molybdopterin synthase complex	EC:2.8.1.9	Molybdenum cofactor sulfurtransferase
Les.3456.1.S1_at	543778	ptpkis1	protein tyrosine phosphatase	NM_001247023	Solyc11g007830.1.1																			1.25324e-05	0.426184	-2.3464	2.42565e-05	0.438204	-2.28204	P:GO:0006470; F:GO:0019203; P:GO:0007623; P:GO:0005982; F:GO:0008138	P:protein dephosphorylation; F:carbohydrate phosphatase activity; P:circadian rhythm; P:starch metabolic process; F:protein tyrosine/serine/threonine phosphatase activity	EC:3.1.3.16; EC:3.1.3.41	Protein-serine/threonine phosphatase; 4-nitrophenylphosphatase
Les.3457.1.S1_at	544243	cpk1	calcium-dependent protein kinase	NM_001247877	Solyc03g031670.2.1																0.0016538	2.37974	2.37974				0.00468676	2.06385	2.06385	C:GO:0005634; F:GO:0005524; F:GO:0005516; P:GO:0009738; C:GO:0005737; F:GO:0005509; P:GO:0046777; F:GO:0004683; P:GO:0009069; P:GO:0018105; P:GO:0035556; F:GO:0009931	C:nucleus; F:ATP binding; F:calmodulin binding; P:abscisic acid-activated signaling pathway; C:cytoplasm; F:calcium ion binding; P:protein autophosphorylation; F:calmodulin-dependent protein kinase activity; P:serine family amino acid metabolic process; P:peptidyl-serine phosphorylation; P:intracellular signal transduction; F:calcium-dependent protein serine/threonine kinase activity	EC:2.7.11; EC:2.7.11.17	Transferring phosphorus-containing groups; Calcium/calmodulin-dependent protein kinase
Les.3458.1.S1_at	544175	LIN8	cell-wall invertase	XM_004249387	Solyc10g083300.1.1				0.0117829	0.15815	-6.32311	0.00938843	0.162087	-6.16951	0.0039563	0.132439	-7.55066				0.0496104	0.247778	-4.03588	0.000524902	0.0782101	-12.7861	0.00635065	0.145414	-6.87691	C:GO:0017177; F:GO:0004575; P:GO:0005982; P:GO:0005985	C:glucosidase II complex; F:sucrose alpha-glucosidase activity; P:starch metabolic process; P:sucrose metabolic process	EC:3.2.1.26; EC:3.2.1.48	Beta-fructofuranosidase; Sucrose alpha-glucosidase
Les.346.1.A1_at	101260970	LOC101260970	uncharacterized LOC101260970	XM_004229881 /// XM_004229882	Solyc01g094770.2.1																						0.00963979	2.12361	2.12361
Les.3460.1.S1_at	543502	Wiv-1	acid invertase	NM_001246913	Solyc10g083290.1.1							0.00334309	5.49758	5.49758							2.52828e-06	30.5562	30.5562	0.0256484	3.38208	3.38208	1.16175e-05	18.487	18.487	C:GO:0017177; F:GO:0004575; P:GO:0005982; P:GO:0005985	C:glucosidase II complex; F:sucrose alpha-glucosidase activity; P:starch metabolic process; P:sucrose metabolic process	EC:3.2.1.26; EC:3.2.1.48	Beta-fructofuranosidase; Sucrose alpha-glucosidase
Les.3465.1.S1_at	543834	ETR6	ethylene receptor-like protein	NM_001247221	Solyc09g089610.2.1																						0.0228469	2.94484	2.94484	C:GO:0005789; F:GO:0000155; F:GO:0051740; C:GO:0009365; F:GO:0038199; C:GO:0016021; P:GO:0010105; P:GO:0009873; P:GO:0023014; P:GO:0018106	C:endoplasmic reticulum membrane; F:phosphorelay sensor kinase activity; F:ethylene binding; C:protein histidine kinase complex; F:ethylene receptor activity; C:integral component of membrane; P:negative regulation of ethylene-activated signaling pathway; P:ethylene-activated signaling pathway; P:signal transduction by protein phosphorylation; P:peptidyl-histidine phosphorylation	EC:2.7.13.3	Histidine kinase
Les.3471.1.S1_at	544228	EIL2	EIL2 protein	NM_001247792	Solyc01g009170.2.1																			0.000259099	2.08034	2.08034				C:GO:0005634; C:GO:0005667; F:GO:0003700; P:GO:0006355; P:GO:0006355	C:nucleus; C:transcription factor complex; F:transcription factor activity, sequence-specific DNA binding; P:regulation of transcription, DNA-templated; P:regulation of transcription, DNA-templated
Les.3472.1.S1_at	543679	EIL1	EIL1 protein	NM_001247612	Solyc06g073720.1.1				3.29667e-05	2.29119	2.29119																			C:GO:0005634; C:GO:0005667; F:GO:0003700; P:GO:0006355; P:GO:0006355	C:nucleus; C:transcription factor complex; F:transcription factor activity, sequence-specific DNA binding; P:regulation of transcription, DNA-templated; P:regulation of transcription, DNA-templated
Les.3473.1.S1_at	543698	LOC543698	beta-mannosidase enzyme	NM_001247691	Solyc03g119080.2.1																						0.000564754	0.336777	-2.96933	P:GO:0005975; F:GO:0008422; P:GO:1901657; F:GO:0102483	P:carbohydrate metabolic process; F:beta-glucosidase activity; P:glycosyl compound metabolic process; F:scopolin beta-glucosidase activity	EC:3.2.1.21	Beta-glucosidase
Les.3477.1.S1_at	543641	LOC543641	uncharacterized LOC543641	XM_004234198	Solyc03g005960.2.1																			0.0235454	0.444488	-2.24978				F:GO:0005524; C:GO:0016021; F:GO:0004672; P:GO:0006468	F:ATP binding; C:integral component of membrane; F:protein kinase activity; P:protein phosphorylation
Les.3478.1.S1_at	543642	HPL	fatty acid hydroperoxide lyase	NM_001247491	Solyc07g049690.2.1																						0.000749023	0.48999	-2.04086	C:GO:0009707; F:GO:0005506; F:GO:0016705; P:GO:0031408; C:GO:0016021; F:GO:0016829; P:GO:0055114; P:GO:0006952; F:GO:0004497; P:GO:0016125; F:GO:0020037	C:chloroplast outer membrane; F:iron ion binding; F:oxidoreductase activity, acting on paired donors, with incorporation or reduction of molecular oxygen; P:oxylipin biosynthetic process; C:integral component of membrane; F:lyase activity; P:oxidation-reduction process; P:defense response; F:monooxygenase activity; P:sterol metabolic process; F:heme binding
Les.3479.1.S1_at	543686	ST2	sulfate transporter 2	NM_001247640	Solyc12g056930.1.1																0.0187755	2.78206	2.78206							C:GO:0005887; F:GO:0008271; P:GO:1902358	C:integral component of plasma membrane; F:secondary active sulfate transmembrane transporter activity; P:sulfate transmembrane transport
Les.3482.1.S1_at	543677	LOC543677	lethal leaf spot 1-like protein	NM_001247606	Solyc11g066440.1.1																			0.00111709	2.14844	2.14844				P:GO:0009816; P:GO:0010154; P:GO:0008219; F:GO:0046872; P:GO:0009908; C:GO:0009534; C:GO:0009941; F:GO:0032441; P:GO:0055114; F:GO:0010277; F:GO:0051537; P:GO:0015996	P:defense response to bacterium, incompatible interaction; P:fruit development; P:cell death; F:metal ion binding; P:flower development; C:chloroplast thylakoid; C:chloroplast envelope; F:pheophorbide a oxygenase activity; P:oxidation-reduction process; F:chlorophyllide a oxygenase [overall] activity; F:2 iron, 2 sulfur cluster binding; P:chlorophyll catabolic process	EC:1.13.12; EC:1.14.13.122	Acting on single donors with incorporation of molecular oxygen (oxygenases). The oxygen incorporated need not be derived from O(2); Chlorophyllide-a oxygenase
Les.3485.1.S1_at	543771	NHX1	Na+/H+ antiporter, isoform 1	NM_001246987	Solyc06g008820.2.1																			0.0393102	2.45379	2.45379				P:GO:0009651; P:GO:0055075; F:GO:0015385; C:GO:0016021; P:GO:1902600; P:GO:0035725; C:GO:0005774; C:GO:0005886; P:GO:0006885	P:response to salt stress; P:potassium ion homeostasis; F:sodium:proton antiporter activity; C:integral component of membrane; P:hydrogen ion transmembrane transport; P:sodium ion transmembrane transport; C:vacuolar membrane; C:plasma membrane; P:regulation of pH
Les.3486.1.S1_at	543701	LOC543701	auxin-regulated protein	NM_001247706	Solyc06g075690.2.1							0.0171583	4.98188	4.98188	0.0142267	5.10136	5.10136				0.00818095	6.69774	6.69774				0.00222299	8.63394	8.63394	C:GO:0005634	C:nucleus
Les.3489.1.S1_at	543772	app1	Xaa-Pro aminopeptidase 1	NM_001246992	Solyc02g085640.2.1																0.000161901	3.19626	3.19626	0.00134348	2.40843	2.40843	4.13848e-05	3.46591	3.46591	F:GO:0046872; P:GO:0006508; F:GO:0004177	F:metal ion binding; P:proteolysis; F:aminopeptidase activity	EC:3.4.11	Acting on peptide bonds (peptidases)
Les.349.1.S1_at	101252194	LOC101252194	dehydration-responsive element-binding protein 3-like	XM_004241698	Solyc06g066540.1.1										0.0384341	3.23406	3.23406							0.00403582	0.1807	-5.53403				C:GO:0005634; F:GO:0003677; C:GO:0005667; F:GO:0003700; P:GO:0006355; P:GO:0006355	C:nucleus; F:DNA binding; C:transcription factor complex; F:transcription factor activity, sequence-specific DNA binding; P:regulation of transcription, DNA-templated; P:regulation of transcription, DNA-templated
Les.3490.1.S1_at	606298	ETR1	ethylene receptor homolog	NM_001247220	Solyc12g011330.2.1																0.00522898	2.148	2.148							C:GO:0009365; F:GO:0038199; P:GO:0009873; P:GO:0023014; C:GO:0005789; F:GO:0000155; F:GO:0005524; F:GO:0005515; F:GO:0051740; F:GO:0046872; C:GO:0016021; P:GO:0010105; P:GO:0018106	C:protein histidine kinase complex; F:ethylene receptor activity; P:ethylene-activated signaling pathway; P:signal transduction by protein phosphorylation; C:endoplasmic reticulum membrane; F:phosphorelay sensor kinase activity; F:ATP binding; F:protein binding; F:ethylene binding; F:metal ion binding; C:integral component of membrane; P:negative regulation of ethylene-activated signaling pathway…	EC:2.7.13.3	Histidine kinase
Les.3491.1.S1_at	543560	cel5	endo-1,4-beta-glucanase	NM_001247161	Solyc08g083210.2.1																			0.00983826	0.161559	-6.18968	0.00236376	0.104858	-9.53671	P:GO:0009835; P:GO:0030245; P:GO:0005982; F:GO:0008810; P:GO:0005985	P:fruit ripening; P:cellulose catabolic process; P:starch metabolic process; F:cellulase activity; P:sucrose metabolic process	EC:3.2.1.4	Cellulase
Les.3493.1.S1_at	544181	PLDb1	phospholipase PLDb1	NM_001247580	Solyc08g080130.2.1							0.00181295	3.3269	3.3269							1.33111e-05	7.2762	7.2762	0.0211601	2.28627	2.28627	0.000211388	4.48855	4.48855	P:GO:0046470; F:GO:0005509; C:GO:0016020; P:GO:0009395; F:GO:0004630; F:GO:0070290	P:phosphatidylcholine metabolic process; F:calcium ion binding; C:membrane; P:phospholipid catabolic process; F:phospholipase D activity; F:N-acylphosphatidylethanolamine-specific phospholipase D activity	EC:3.1.4.4	Phospholipase D
Les.3494.1.S1_at	544251	PLDa2	phospholipase PLDa2	NM_001247934	Solyc08g066790.2.1																3.39323e-05	20.6527	20.6527				0.000480986	9.74251	9.74251	P:GO:0046470; F:GO:0005509; C:GO:0016020; P:GO:0009395; F:GO:0004630; F:GO:0070290	P:phosphatidylcholine metabolic process; F:calcium ion binding; C:membrane; P:phospholipid catabolic process; F:phospholipase D activity; F:N-acylphosphatidylethanolamine-specific phospholipase D activity	EC:3.1.4.4	Phospholipase D
Les.35.1.S1_at	543589	ETR5	ethylene receptor homolog	NM_001247283	Solyc11g006180.1.1				0.00203965	2.87247	2.87247										0.000669502	3.30053	3.30053							C:GO:0005789; F:GO:0000155; F:GO:0051740; C:GO:0009365; F:GO:0038199; C:GO:0016021; P:GO:0010105; P:GO:0009873; P:GO:0023014; P:GO:0018106	C:endoplasmic reticulum membrane; F:phosphorelay sensor kinase activity; F:ethylene binding; C:protein histidine kinase complex; F:ethylene receptor activity; C:integral component of membrane; P:negative regulation of ethylene-activated signaling pathway; P:ethylene-activated signaling pathway; P:signal transduction by protein phosphorylation; P:peptidyl-histidine phosphorylation	EC:2.7.13.3	Histidine kinase
Les.3502.1.S1_at	543684	LOC543684	auxin-regulated dual specificity cytosolic kinase	NM_001247632	Solyc06g062920.2.1																0.00174654	4.66974	4.66974				0.00371501	3.8068	3.8068	F:GO:0005524; F:GO:0004672; P:GO:0006468	F:ATP binding; F:protein kinase activity; P:protein phosphorylation
Les.3505.1.S1_at	543659	Ve1	verticillium wilt disease resistance protein	NM_001247545	Solyc09g005090.1.1							0.000444552	32.9906	32.9906							7.66753e-05	74.7286	74.7286	0.0131948	9.44344	9.44344	0.00290196	17.093	17.093	C:GO:0016021	C:integral component of membrane
Les.3506.1.S1_at	544230	Ve2	verticillium wilt disease resistance protein Ve2	NM_001247804	Solyc09g005080.1.1				0.00762891	2.67418	2.67418	0.000553687	3.62019	3.62019	0.00109467	3.24251	3.24251				4.78921e-05	5.40756	5.40756				5.14168e-05	4.94007	4.94007	C:GO:0016021	C:integral component of membrane
Les.3507.1.S1_at	543761	vp1.1	vacuolar-type H+-pyrophosphatase	XM_004242687	Solyc07g007600.2.1																0.00880026	0.498273	-2.00693	0.00548073	0.497561	-2.0098	0.00105597	0.419123	-2.38594	F:GO:0004427; P:GO:0015992; P:GO:0055085; P:GO:0006119; C:GO:0016021; F:GO:0009678	F:inorganic diphosphatase activity; P:proton transport; P:transmembrane transport; P:oxidative phosphorylation; C:integral component of membrane; F:hydrogen-translocating pyrophosphatase activity	EC:3.6.1.1	Inorganic diphosphatase
Les.3508.1.S1_at	543666	DHS	deoxyhypusine synthase	NM_001247566	Solyc02g080800.2.1																0.000145724	4.14464	4.14464				0.00490432	2.51887	2.51887	F:GO:0034038; P:GO:0008612	F:deoxyhypusine synthase activity; P:peptidyl-lysine modification to peptidyl-hypusine	EC:2.5.1.46	Deoxyhypusine synthase
Les.3509.1.S1_at	543590	AMT1-3	ammonium transporter	NM_001247287	Solyc03g045070.1.1																			1.11037e-06	0.149467	-6.69043				F:GO:0008519; C:GO:0005887; P:GO:0015695; P:GO:0072488; P:GO:0019740	F:ammonium transmembrane transporter activity; C:integral component of plasma membrane; P:organic cation transport; P:ammonium transmembrane transport; P:nitrogen utilization
Les.351.1.S1_at	543768	cdkB1	B1-type cyclin dependent kinase	NM_001246970	Solyc10g074720.1.1																			0.0289519	0.303848	-3.29112				F:GO:0005524; P:GO:0009069; F:GO:0004674; P:GO:0006468	F:ATP binding; P:serine family amino acid metabolic process; F:protein serine/threonine kinase activity; P:protein phosphorylation	EC:2.7.11	Transferring phosphorus-containing groups
Les.3510.1.S1_at	544220	dxs	1-D-deoxyxylulose 5-phosphate synthase	NM_001247743	Solyc01g067890.2.1																1.99979e-05	0.235572	-4.24499				1.05486e-06	0.182934	-5.46644	C:GO:0009507; F:GO:0008661; F:GO:0046872; P:GO:0006694; P:GO:0016114; P:GO:0009228; P:GO:0052865	C:chloroplast; F:1-deoxy-D-xylulose-5-phosphate synthase activity; F:metal ion binding; P:steroid biosynthetic process; P:terpenoid biosynthetic process; P:thiamine biosynthetic process; P:1-deoxy-D-xylulose 5-phosphate biosynthetic process	EC:2.2.1.7	1-deoxy-D-xylulose-5-phosphate synthase
Les.3513.1.S1_at	778198	LOC778198	uncharacterized LOC778198	NM_001247713	Solyc07g066240.2.1																						0.0154186	2.1361	2.1361	C:GO:0005667; F:GO:0003700; P:GO:0006355; F:GO:0043565; P:GO:0006355	C:transcription factor complex; F:transcription factor activity, sequence-specific DNA binding; P:regulation of transcription, DNA-templated; F:sequence-specific DNA binding; P:regulation of transcription, DNA-templated
Les.3517.2.S1_a_at	543617	LOC543617	cycloidea	NM_001247406	Solyc07g062680.1.1																			9.39194e-05	0.349493	-2.86129				C:GO:0005634; F:GO:0003677; P:GO:0006351; P:GO:0006355	C:nucleus; F:DNA binding; P:transcription, DNA-templated; P:regulation of transcription, DNA-templated
Les.3519.1.S1_at	543722	cycd3c2	D-type cyclin-2	NM_001247824	Solyc01g107730.2.1							0.0150057	0.153739	-6.50454							0.017364	0.146918	-6.80653	0.000387127	0.0541469	-18.4683	0.0372113	0.207243	-4.82525	C:GO:0005634; P:GO:0009739; P:GO:0000082; P:GO:0048316; P:GO:0009735	C:nucleus; P:response to gibberellin; P:G1/S transition of mitotic cell cycle; P:seed development; P:response to cytokinin
Les.3520.1.S1_at	543748	cycD3	cyclin D3.1	NM_001246865	Solyc02g092980.2.1																			0.0135719	0.494951	-2.0204				C:GO:0005634; C:GO:0016021	C:nucleus; C:integral component of membrane
Les.3523.1.S1_at	543599	XOPG1	polygalacturonase	NM_001247327	Solyc03g116500.2.1										0.00239067	2.24861	2.24861				9.37048e-05	3.32908	3.32908							C:GO:0016021; F:GO:0004650; P:GO:0071555; C:GO:0005576; P:GO:0005982; P:GO:0005985	C:integral component of membrane; F:polygalacturonase activity; P:cell wall organization; C:extracellular region; P:starch metabolic process; P:sucrose metabolic process	EC:3.2.1.15	Polygalacturonase
Les.3524.1.S1_at	543649	NSY	lycopene beta-cyclase, chromoplastic	NM_001247516	Solyc06g074240.1.1							0.0303725	3.17951	3.17951	0.0429037	2.87302	2.87302										0.00949501	4.13798	4.13798	C:GO:0009509; F:GO:0034020; C:GO:0009507; F:GO:0016705; P:GO:0044550; F:GO:0052728; P:GO:0009688; P:GO:0055114; F:GO:0052727; P:GO:0016123; F:GO:0004497	C:chromoplast; F:neoxanthin synthase activity; C:chloroplast; F:oxidoreductase activity, acting on paired donors, with incorporation or reduction of molecular oxygen; P:secondary metabolite biosynthetic process; F:capsorubin synthase activity; P:abscisic acid biosynthetic process; P:oxidation-reduction process; F:capsanthin synthase activity; P:xanthophyll biosynthetic process; F:monooxygenase ac…	EC:5.3.99.9; EC:5.3.99.8	Neoxanthin synthase; Capsanthin/capsorubin synthase
Les.3525.1.S1_at	544209	ODC	ornithine decarboxylase	NM_001247687	Solyc04g082030.1.1							0.0431666	2.02514	2.02514													0.0152804	0.421082	-2.37483	P:GO:0006525; C:GO:0005737; P:GO:0006560; P:GO:0033387; F:GO:0004586	P:arginine metabolic process; C:cytoplasm; P:proline metabolic process; P:putrescine biosynthetic process from ornithine; F:ornithine decarboxylase activity	EC:4.1.1.17	Ornithine decarboxylase
Les.3526.1.S1_a_at	544171	DGK1	calmodulin-binding diacylglycerol kinase	NM_001247547	Solyc07g054830.2.1							0.0256078	2.06022	2.06022													0.00106121	3.11867	3.11867	F:GO:0005524; P:GO:0046486; P:GO:0009395; F:GO:0004143; P:GO:0016310; P:GO:0007205	F:ATP binding; P:glycerolipid metabolic process; P:phospholipid catabolic process; F:diacylglycerol kinase activity; P:phosphorylation; P:protein kinase C-activating G-protein coupled receptor signaling pathway	EC:2.7.1.107	Diacylglycerol kinase (ATP)
Les.3527.1.S1_at	543818	TomloxE	lipoxygenase	NM_001247169	Solyc01g099170.2.1																			0.000962978	5.32525	5.32525	1.12773e-05	12.4596	12.4596	F:GO:0016702; C:GO:0005737; F:GO:0046872; P:GO:0031408; P:GO:0055114	F:oxidoreductase activity, acting on single donors with incorporation of molecular oxygen, incorporation of two atoms of oxygen; C:cytoplasm; F:metal ion binding; P:oxylipin biosynthetic process; P:oxidation-reduction process	EC:1.13.11	Acting on single donors with incorporation of molecular oxygen (oxygenases). The oxygen incorporated need not be derived from O(2)
Les.3530.1.S1_at	543650	AO1	aldehyde oxidase	NM_001247520	Solyc11g071620.1.1																						0.00374989	0.498781	-2.00489	F:GO:0016614; P:GO:0006570; P:GO:0042816; F:GO:0009055; P:GO:0006552; P:GO:0006574; F:GO:0004031; P:GO:0009115; P:GO:0009851; P:GO:0006550; P:GO:0006568; F:GO:0004854; P:GO:0006769; P:GO:0006118; P:GO:0046497; F:GO:0005506; F:GO:0050660; C:GO:0005829; P:GO:0055114; F:GO:0051537	F:oxidoreductase activity, acting on CH-OH group of donors; P:tyrosine metabolic process; P:vitamin B6 metabolic process; F:electron carrier activity; P:leucine catabolic process; P:valine catabolic process; F:aldehyde oxidase activity; P:xanthine catabolic process; P:auxin biosynthetic process; P:isoleucine catabolic process; P:tryptophan metabolic process; F:xanthine dehydrogenase activity; P:n…	EC:1.17.1; EC:1.17.1.4; EC:1.2.3.1	Acting on CH or CH(2) groups; Xanthine dehydrogenase; Aldehyde oxidase
Les.3533.1.S1_at	101259118	LOC101259118	ferredoxin-3, chloroplastic-like	XM_004251007 /// XM_004251008	Solyc11g068430.1.1																			0.00570779	0.443414	-2.25523				P:GO:0006118; F:GO:0046872; F:GO:0009055; P:GO:0022900; F:GO:0051537	P:obsolete electron transport; F:metal ion binding; F:electron carrier activity; P:electron transport chain; F:2 iron, 2 sulfur cluster binding
Les.3535.1.S1_at	543965	TFT3	14-3-3 protein homologue	NM_001247748	Solyc04g074510.2.1																0.000564649	0.382212	-2.61635				0.00209561	0.452728	-2.20883	F:GO:0019904	F:protein domain specific binding
Les.3537.1.A1_at	543511	LOC543511	probable xyloglucan endotransglucosylase/hydrolase protein 27	NM_001309790	Solyc04g008210.1.1										0.0100924	0.263758	-3.79136							0.00575766	3.72334	3.72334	0.0241623	2.88402	2.88402	C:GO:0005618; C:GO:0048046; P:GO:0071555; F:GO:0004553; F:GO:0016762; P:GO:0010411; P:GO:0042546	C:cell wall; C:apoplast; P:cell wall organization; F:hydrolase activity, hydrolyzing O-glycosyl compounds; F:xyloglucan:xyloglucosyl transferase activity; P:xyloglucan metabolic process; P:cell wall biogenesis	EC:2.4.1.207	Xyloglucan:xyloglucosyl transferase
Les.3538.1.S1_at	543632	STC	cystatin	XM_004228432 /// XM_004228433	Solyc01g009020.2.1																			0.000420587	2.08829	2.08829				F:GO:0004869; P:GO:0006508; P:GO:0010951; F:GO:0008233	F:cysteine-type endopeptidase inhibitor activity; P:proteolysis; P:negative regulation of endopeptidase activity; F:peptidase activity
Les.3539.1.S1_at	543633	LOC543633	phosphoenolpyruvate carboxylase kinase	NM_001247465	Solyc04g009900.2.1	0.0183589	0.481114	-2.07851	3.81327e-05	0.244169	-4.09552													0.00218409	2.43752	2.43752	0.000150624	3.30124	3.30124	C:GO:0005634; F:GO:0005524; F:GO:0005516; P:GO:0009738; C:GO:0005737; P:GO:0046777; F:GO:0004683; P:GO:0009069; P:GO:0018105; C:GO:0005886; P:GO:0035556; F:GO:0009931	C:nucleus; F:ATP binding; F:calmodulin binding; P:abscisic acid-activated signaling pathway; C:cytoplasm; P:protein autophosphorylation; F:calmodulin-dependent protein kinase activity; P:serine family amino acid metabolic process; P:peptidyl-serine phosphorylation; C:plasma membrane; P:intracellular signal transduction; F:calcium-dependent protein serine/threonine kinase activity	EC:2.7.11; EC:2.7.11.17	Transferring phosphorus-containing groups; Calcium/calmodulin-dependent protein kinase
Les.3540.1.S1_at	543751	ctd3	aminoacylase-1	XM_004231056	Solyc01g112280.2.1																			7.65375e-06	2.81431	2.81431				F:GO:0046872; P:GO:0000051; P:GO:0006508; P:GO:0006520; C:GO:0005783; C:GO:0005794; C:GO:0005773; F:GO:0004046; F:GO:0008237	F:metal ion binding; P:obsolete urea cycle intermediate metabolic process; P:proteolysis; P:cellular amino acid metabolic process; C:endoplasmic reticulum; C:Golgi apparatus; C:vacuole; F:aminoacylase activity; F:metallopeptidase activity	EC:3.5.1.14	N-acyl-aliphatic-L-amino acid amidohydrolase
Les.3542.1.S1_at	544165	MYC2	transcription factor MYC2	NM_001324483	Solyc08g076930.1.1																			9.20918e-05	2.8115	2.8115	0.00463615	2.00364	2.00364	F:GO:0003677; F:GO:0046983	F:DNA binding; F:protein dimerization activity
Les.3543.1.S1_at	543733	HY5	THY5 protein	NM_001247891	Solyc08g061130.2.1																						0.0142348	2.85666	2.85666	P:GO:0010099; P:GO:0009585; F:GO:0003690; P:GO:0006355; F:GO:0043565; P:GO:0009740; P:GO:0006355; P:GO:0042753; C:GO:0005634; P:GO:0031539; C:GO:0005667; F:GO:0003700; P:GO:0009737; P:GO:0010224	P:regulation of photomorphogenesis; P:red, far-red light phototransduction; F:double-stranded DNA binding; P:regulation of transcription, DNA-templated; F:sequence-specific DNA binding; P:gibberellic acid mediated signaling pathway; P:regulation of transcription, DNA-templated; P:positive regulation of circadian rhythm; C:nucleus; P:positive regulation of anthocyanin metabolic process; C:transcri…
Les.3545.1.S1_at	544133	CrtR-b1	beta-carotene hydroxylase	NM_001247419	Solyc06g036260.2.1										0.0102358	0.46061	-2.17104													P:GO:0016117; F:GO:0005506; F:GO:0016491; C:GO:0031969; C:GO:0016021; P:GO:0055114; P:GO:0006633; F:GO:0016787	P:carotenoid biosynthetic process; F:iron ion binding; F:oxidoreductase activity; C:chloroplast membrane; C:integral component of membrane; P:oxidation-reduction process; P:fatty acid biosynthetic process; F:hydrolase activity
Les.3548.1.S1_at	543580	LOC543580	universal stress protein A-like protein	NM_001321169	Solyc04g076200.2.1																0.00198748	0.341792	-2.92575							P:GO:0006950; F:GO:0016787	P:response to stress; F:hydrolase activity
Les.3550.1.S1_at	101055596	hsc70.3	heat shock protein 70-3	NM_001279284	Solyc04g011440.2.1							0.0285918	3.24828	3.24828	0.0362214	3.01085	3.01085				0.001104	7.25452	7.25452	1.6258e-06	24.5382	24.5382	1.02987e-06	28.7418	28.7418	F:GO:0000166; F:GO:0005524	F:nucleotide binding; F:ATP binding
Les.3551.1.S1_at	544168	ER24	ethylene-responsive transcriptional coactivator	NM_001247539	Solyc01g104740.2.1							0.00025677	12.425	12.425							2.59728e-06	45.4397	45.4397	0.000231096	12.1877	12.1877	4.99897e-06	32.1161	32.1161	C:GO:0005667; F:GO:0003713; P:GO:0045893; F:GO:0043565; C:GO:0005730	C:transcription factor complex; F:transcription coactivator activity; P:positive regulation of transcription, DNA-templated; F:sequence-specific DNA binding; C:nucleolus
Les.3555.1.S1_at	778354	H2B-2	histone H2B-2	XM_004250938	Solyc11g066430.1.1																			0.0227714	0.384545	-2.60048	0.00071842	0.210082	-4.76004	F:GO:0003677; F:GO:0046982; C:GO:0000788; P:GO:0006334	F:DNA binding; F:protein heterodimerization activity; C:nuclear nucleosome; P:nucleosome assembly
Les.3559.1.A1_at	543741	LOC543741	gamma-thionin	NM_001247943	Solyc07g007750.2.1	0.00110192	0.0489269	-20.4387	0.0326621	0.173221	-5.77297																			P:GO:0006508; P:GO:0031640; F:GO:0008233; P:GO:0050832	P:proteolysis; P:killing of cells of other organism; F:peptidase activity; P:defense response to fungus
Les.356.1.S1_at	101262532	LOC101262532	uncharacterized LOC101262532	XM_004242611	Solyc07g006490.2.1																			5.94461e-07	0.326318	-3.06449				C:GO:0016021; C:GO:0009535	C:integral component of membrane; C:chloroplast thylakoid membrane
Les.3565.1.S1_a_at	101262847	LOC101262847	phytochrome B1-like	XM_004228961	Solyc01g059870.2.1																0.00107899	0.483565	-2.06797							F:GO:0042803; P:GO:0009585; C:GO:0009365; F:GO:0009881; P:GO:0006351; P:GO:0009584; P:GO:0006355; P:GO:0023014; F:GO:0000155; C:GO:0005634; P:GO:0000160; P:GO:0018298; P:GO:0017006	F:protein homodimerization activity; P:red, far-red light phototransduction; C:protein histidine kinase complex; F:photoreceptor activity; P:transcription, DNA-templated; P:detection of visible light; P:regulation of transcription, DNA-templated; P:signal transduction by protein phosphorylation; F:phosphorelay sensor kinase activity; C:nucleus; P:phosphorelay signal transduction system; P:protein…	EC:2.7.13.3	Histidine kinase
Les.3566.1.S1_at	544298	LOC544298	gluaredoxin	NM_001247059	Solyc06g005260.2.1																1.10775e-05	2.34961	2.34961				7.20615e-06	2.3151	2.3151	P:GO:0006118; F:GO:0015035; F:GO:0009055; C:GO:0048046; C:GO:0005829; C:GO:0005794; P:GO:0045454; P:GO:0055114; C:GO:0005773; C:GO:0005886	P:obsolete electron transport; F:protein disulfide oxidoreductase activity; F:electron carrier activity; C:apoplast; C:cytosol; C:Golgi apparatus; P:cell redox homeostasis; P:oxidation-reduction process; C:vacuole; C:plasma membrane
Les.3573.1.S1_at	544041	LOC544041	Pti4	XM_004239935	Solyc05g052050.1.1				0.0116381	3.04722	3.04722				0.00438377	0.300444	-3.32841				0.000493318	5.22254	5.22254	0.0220823	0.393443	-2.54167	0.0408723	2.31032	2.31032	C:GO:0005634; F:GO:0003677; C:GO:0005667; F:GO:0003700; P:GO:0006355; P:GO:0009873; P:GO:0006952; P:GO:0006355	C:nucleus; F:DNA binding; C:transcription factor complex; F:transcription factor activity, sequence-specific DNA binding; P:regulation of transcription, DNA-templated; P:ethylene-activated signaling pathway; P:defense response; P:regulation of transcription, DNA-templated
Les.3574.1.S1_at	544043	LOC544043	Pti6	NM_001247062	Solyc06g082590.1.1							0.00628168	2.63401	2.63401							0.000577863	3.869	3.869	0.00172387	3.07597	3.07597	9.23768e-05	4.61275	4.61275	C:GO:0005634; F:GO:0003677; C:GO:0005667; F:GO:0003700; P:GO:0006355; P:GO:0010104; P:GO:0006952; P:GO:0006355; P:GO:0009723; P:GO:0009733	C:nucleus; F:DNA binding; C:transcription factor complex; F:transcription factor activity, sequence-specific DNA binding; P:regulation of transcription, DNA-templated; P:regulation of ethylene-activated signaling pathway; P:defense response; P:regulation of transcription, DNA-templated; P:response to ethylene; P:response to auxin
Les.3575.1.S1_at	544042	LOC544042	Pti5	NM_001247058	Solyc02g077370.1.1							0.000341644	19.5819	19.5819	0.0286621	5.03763	5.03763				3.91375e-05	43.8927	43.8927				0.000437933	18.2318	18.2318	C:GO:0005634; F:GO:0003677; C:GO:0005667; F:GO:0003700; P:GO:0006355; P:GO:0006952; P:GO:0006355	C:nucleus; F:DNA binding; C:transcription factor complex; F:transcription factor activity, sequence-specific DNA binding; P:regulation of transcription, DNA-templated; P:defense response; P:regulation of transcription, DNA-templated
Les.3576.1.S1_at	544019	DCL	defective chloroplasts and leaves; required for chloroplast development and palisade ce	NM_001246945	Solyc04g078850.2.1																			2.46305e-07	0.369022	-2.70987				C:GO:0009507	C:chloroplast
Les.3578.1.S1_at	543572	HSP17.4	cytosolic class II small heat shock protein HCT2	NM_001247201	Solyc08g062340.2.1	0.0309801	2.12019	2.12019													0.0184622	2.21078	2.21078							C:GO:0005737	C:cytoplasm
Les.3579.1.S1_at	778300	LOC778300	Metallothionein-like protein	NM_001247125	Solyc04g058100.2.1							0.0430264	2.29307	2.29307																F:GO:0046872	F:metal ion binding
Les.358.1.S1_at	101254641	LOC101254641	uncharacterized LOC101254641	XM_004230277	Solyc01g100750.2.1																			0.0228725	0.34261	-2.91877	0.0416902	0.381491	-2.6213
Les.3583.1.A1_at	544134	TSI-1	TSI-1 protein	NM_001247423	Solyc09g090990.2.1																3.58064e-06	35.5493	35.5493	0.000231859	10.9347	10.9347	4.6919e-06	28.0761	28.0761	C:GO:0005634; F:GO:0004864; P:GO:0009607; P:GO:0009738; P:GO:0043086; P:GO:0080163; C:GO:0005737; F:GO:0010427; F:GO:0004872; P:GO:0006952	C:nucleus; F:protein phosphatase inhibitor activity; P:response to biotic stimulus; P:abscisic acid-activated signaling pathway; P:negative regulation of catalytic activity; P:regulation of protein serine/threonine phosphatase activity; C:cytoplasm; F:abscisic acid binding; F:receptor activity; P:defense response
Les.3588.1.S1_at	101252554	LOC101252554	serine/threonine-protein kinase D6PK-like	XM_004250986///XM_010315032 ///XM_010315033///XM_010315034	Solyc11g067070.1.1													0.0242454	0.435682	-2.29525	0.00025092	0.201869	-4.9537							C:GO:0005634; F:GO:0005524; C:GO:0005737; P:GO:0009069; F:GO:0004674; P:GO:0006468; C:GO:0005886; P:GO:0035556	C:nucleus; F:ATP binding; C:cytoplasm; P:serine family amino acid metabolic process; F:protein serine/threonine kinase activity; P:protein phosphorylation; C:plasma membrane; P:intracellular signal transduction	EC:2.7.11	Transferring phosphorus-containing groups
Les.3590.1.S1_at	544272	XTH1	endo-xyloglucan transferase	NM_001246929	Solyc01g099630.2.1																0.00609133	0.382695	-2.61304				0.007814	0.41398	-2.41558	C:GO:0005618; C:GO:0048046; C:GO:0016021; P:GO:0071555; F:GO:0004553; F:GO:0016762; P:GO:0010411; P:GO:0042546	C:cell wall; C:apoplast; C:integral component of membrane; P:cell wall organization; F:hydrolase activity, hydrolyzing O-glycosyl compounds; F:xyloglucan:xyloglucosyl transferase activity; P:xyloglucan metabolic process; P:cell wall biogenesis	EC:2.4.1.207	Xyloglucan:xyloglucosyl transferase
Les.3593.1.S1_at	544056	TAS14	TAS14 peptide (AA 1-130)	NM_001247109	Solyc02g084850.2.1																						0.0118647	9.88109	9.88109	P:GO:0009737; C:GO:0005829; P:GO:0009631; P:GO:0006950; P:GO:0009415; P:GO:0009414	P:response to abscisic acid; C:cytosol; P:cold acclimation; P:response to stress; P:response to water; P:response to water deprivation
Les.3597.1.S1_at	544274	P18	deoxyuridine triphosphatase	NM_001246941	Solyc01g100030.2.1							0.0425196	0.376051	-2.65921													0.0238606	0.332073	-3.01139	P:GO:0006206; F:GO:0004170; F:GO:0046872; P:GO:0006226; P:GO:0046080	P:pyrimidine nucleobase metabolic process; F:dUTP diphosphatase activity; F:metal ion binding; P:dUMP biosynthetic process; P:dUTP metabolic process	EC:3.6.1.23; EC:3.6.1.19	dUTP diphosphatase; Nucleoside-triphosphate diphosphatase
Les.36.1.S1_at	543588	ETR4	ethylene receptor homolog	NM_001247276	Solyc06g053710.2.1				0.00297782	4.33924	4.33924										1.45409e-06	17.6185	17.6185							C:GO:0009365; P:GO:0007165; F:GO:0038199; P:GO:0009873; P:GO:0023014; F:GO:0004673; F:GO:0000155; C:GO:0005789; F:GO:0051740; F:GO:0046872; P:GO:0000160; C:GO:0016020; P:GO:0010105; C:GO:0016021; P:GO:0050896; P:GO:0018106	C:protein histidine kinase complex; P:signal transduction; F:ethylene receptor activity; P:ethylene-activated signaling pathway; P:signal transduction by protein phosphorylation; F:protein histidine kinase activity; F:phosphorelay sensor kinase activity; C:endoplasmic reticulum membrane; F:ethylene binding; F:metal ion binding; P:phosphorelay signal transduction system; C:membrane; P:negative reg…	EC:2.7.13.3	Histidine kinase
Les.360.1.S1_at	544074	ADH2	alcohol dehydrogenase	NM_001247170	Solyc06g059740.2.1										0.00821699	4.69339	4.69339							0.042007	3.15609	3.15609	9.90983e-05	13.0356	13.0356	F:GO:0008270; C:GO:0005737; F:GO:0003979; P:GO:0055114; F:GO:0004022; P:GO:0005982; P:GO:0005985; P:GO:0009117	F:zinc ion binding; C:cytoplasm; F:UDP-glucose 6-dehydrogenase activity; P:oxidation-reduction process; F:alcohol dehydrogenase (NAD) activity; P:starch metabolic process; P:sucrose metabolic process; P:nucleotide metabolic process	EC:1.1.1.22; EC:1.1.1.1	UDP-glucose 6-dehydrogenase; Alcohol dehydrogenase
Les.3601.1.S1_s_at	544061	LOC544061	glycine-rich protein	NM_001247128	Solyc09g082810.2.1	0.021327	0.105731	-9.45793							0.0244539	0.141077	-7.08832							0.000341064	30.9438	30.9438	0.0188922	8.09278	8.09278
Les.3608.1.S1_at	544084	CEVI-1	peroxidase	NM_001247203	Solyc01g006300.2.1							0.0134643	3.44663	3.44663							0.0018199	5.55395	5.55395	7.97898e-06	13.7324	13.7324	1.75573e-05	12.3411	12.3411	F:GO:0004601; P:GO:0006979; F:GO:0046872; P:GO:0006804; C:GO:0016021; P:GO:0098869; P:GO:0055114; C:GO:0005576; F:GO:0020037; P:GO:0042744	F:peroxidase activity; P:response to oxidative stress; F:metal ion binding; P:obsolete peroxidase reaction; C:integral component of membrane; P:cellular oxidant detoxification; P:oxidation-reduction process; C:extracellular region; F:heme binding; P:hydrogen peroxide catabolic process	EC:1.11.1.7	Peroxidase
Les.3609.1.S1_at	544088	LOC544088	aspartate carbamoyltransferase	XM_004249881	Solyc11g006350.1.1	3.55737e-05	6.02279	6.02279										0.00104175	3.2363	3.2363	0.0133411	2.44728	2.44728							C:GO:0009570; F:GO:0004070; P:GO:0006207; P:GO:0000050; P:GO:0009220; C:GO:0009347; C:GO:0005829; P:GO:0006531; F:GO:0016597; P:GO:0006522	C:chloroplast stroma; F:aspartate carbamoyltransferase activity; P:'de novo' pyrimidine nucleobase biosynthetic process; P:urea cycle; P:pyrimidine ribonucleotide biosynthetic process; C:aspartate carbamoyltransferase complex; C:cytosol; P:aspartate metabolic process; F:amino acid binding; P:alanine metabolic process	EC:2.1.3.2	Aspartate carbamoyltransferase
Les.361.1.A1_at	100316883	PHS1	terpene synthase	NM_001247700	Solyc08g005670.2.1																			0.0363436	0.263893	-3.78942				F:GO:0000287; F:GO:0016829; F:GO:0010333	F:magnesium ion binding; F:lyase activity; F:terpene synthase activity
Les.3614.1.S1_at	544186	TPSI1	TPSI1 protein	NM_001247596	Solyc10g085850.1.1							0.0194682	0.327355	-3.05479							0.0144328	0.290535	-3.44193	0.00325306	0.237623	-4.20834
Les.3618.1.S1_at	544001	LOC544001	uncharacterized LOC544001	NM_001246840	Solyc11g022590.1.1							0.0303424	0.213613	-4.68136																F:GO:0004866; P:GO:0010951	F:endopeptidase inhibitor activity; P:negative regulation of endopeptidase activity
Les.3619.1.S1_at	543953	ER1	proteinase inhibitor I	NM_001247686	Solyc08g080630.2.1																0.0463788	9.75262	9.75262	0.0463681	8.41953	8.41953	0.00816979	19.8073	19.8073	F:GO:0004867; P:GO:0009611; P:GO:0010951; C:GO:0005576	F:serine-type endopeptidase inhibitor activity; P:response to wounding; P:negative regulation of endopeptidase activity; C:extracellular region
Les.3620.1.S1_at	543840	LOC543840	TAG1 transcription factor	XM_004232947	Solyc02g071730.2.1																						0.000205863	7.6119	7.6119	C:GO:0005634; F:GO:0003677; C:GO:0005667; F:GO:0003700; P:GO:0006355; F:GO:0046983; P:GO:0006355	C:nucleus; F:DNA binding; C:transcription factor complex; F:transcription factor activity, sequence-specific DNA binding; P:regulation of transcription, DNA-templated; F:protein dimerization activity; P:regulation of transcription, DNA-templated
Les.3623.1.S1_at	543958	SAR2	GTPase	NM_001247711	Solyc01g060130.2.1																0.00027191	3.14068	3.14068				0.00128091	2.53254	2.53254	F:GO:0005525; P:GO:0016192; C:GO:0005829; C:GO:0005783; C:GO:0005794; P:GO:0006886	F:GTP binding; P:vesicle-mediated transport; C:cytosol; C:endoplasmic reticulum; C:Golgi apparatus; P:intracellular protein transport
Les.3635.1.S1_at	544296	P69B	subtilisin-like protease	NM_001247053	Solyc08g079870.1.1							0.0130471	4.26062	4.26062							0.000532332	9.81181	9.81181	0.026449	3.50612	3.50612	0.0118487	4.35964	4.35964	C:GO:0005618; P:GO:0006508; F:GO:0004252	C:cell wall; P:proteolysis; F:serine-type endopeptidase activity	EC:3.4.21	Acting on peptide bonds (peptidases)
Les.3637.1.S1_at	778303	LOC778303	branched chain alpha-keto acid dehydrogenase E1-alpha subunit	NM_001247137	Solyc06g059840.2.1																			0.000196387	0.166189	-6.01724				F:GO:0003863; C:GO:0017086; P:GO:0006552; P:GO:0006574; P:GO:0055114; P:GO:0006550	F:3-methyl-2-oxobutanoate dehydrogenase (2-methylpropanoyl-transferring) activity; C:3-methyl-2-oxobutanoate dehydrogenase (lipoamide) complex; P:leucine catabolic process; P:valine catabolic process; P:oxidation-reduction process; P:isoleucine catabolic process	EC:1.2.4.4	3-methyl-2-oxobutanoate dehydrogenase (2-methylpropanoyl-transferring)
Les.3639.1.S1_at	544023	Frk1	fructokinase	NM_001246964	Solyc03g006860.2.1																						0.0111108	4.30897	4.30897	P:GO:0006013; P:GO:0006000; P:GO:0016310; F:GO:0016740; F:GO:0016773; P:GO:0046835; F:GO:0016301; P:GO:0005982; F:GO:0008865; P:GO:0005985	P:mannose metabolic process; P:fructose metabolic process; P:phosphorylation; F:transferase activity; F:phosphotransferase activity, alcohol group as acceptor; P:carbohydrate phosphorylation; F:kinase activity; P:starch metabolic process; F:fructokinase activity; P:sucrose metabolic process	EC:2.7.1.4; EC:2.7.1.1	Fructokinase; Hexokinase
Les.3640.1.S1_at	544110	AMT1-2	ammonium transporter	NM_001247324	Solyc04g050440.2.1							0.00143352	5.34161	5.34161							0.00277844	5.08761	5.08761	8.19665e-07	21.4095	21.4095	0.000137131	8.3187	8.3187	F:GO:0008519; C:GO:0005887; P:GO:0072488; P:GO:0019740; P:GO:0015843	F:ammonium transmembrane transporter activity; C:integral component of plasma membrane; P:ammonium transmembrane transport; P:nitrogen utilization; P:methylammonium transport
Les.3642.1.S1_at	778292	ACS3	ACC synthase	NM_001247097	Solyc02g091990.2.1																			0.000115624	3.0389	3.0389				P:GO:0042218; F:GO:0030170; F:GO:0016847; P:GO:0009693; P:GO:0006520; P:GO:0009835	P:1-aminocyclopropane-1-carboxylate biosynthetic process; F:pyridoxal phosphate binding; F:1-aminocyclopropane-1-carboxylate synthase activity; P:ethylene biosynthetic process; P:cellular amino acid metabolic process; P:fruit ripening	EC:4.4.1.14	1-aminocyclopropane-1-carboxylate synthase
Les.3643.1.S1_at	544192	vsf-1	vsf-1 protein	NM_001247619	Solyc04g081190.2.1																						0.00168318	2.14233	2.14233	C:GO:0005634; C:GO:0005667; F:GO:0003700; P:GO:0006355; F:GO:0043565; P:GO:0006355	C:nucleus; C:transcription factor complex; F:transcription factor activity, sequence-specific DNA binding; P:regulation of transcription, DNA-templated; F:sequence-specific DNA binding; P:regulation of transcription, DNA-templated
Les.3645.1.S1_at	100037489	CYP85A1	6-deoxocastasterone oxidase	NM_001247334	Solyc02g089160.2.1							5.43938e-06	4.81058	4.81058										4.26047e-07	6.26178	6.26178				F:GO:0005506; F:GO:0016705; P:GO:0007275; C:GO:0016021; P:GO:0016132; P:GO:0055114; F:GO:0004497; P:GO:0016125; P:GO:0010268; F:GO:0020037	F:iron ion binding; F:oxidoreductase activity, acting on paired donors, with incorporation or reduction of molecular oxygen; P:multicellular organism development; C:integral component of membrane; P:brassinosteroid biosynthetic process; P:oxidation-reduction process; F:monooxygenase activity; P:sterol metabolic process; P:brassinosteroid homeostasis; F:heme binding
Les.3649.1.S1_at	778295	CHS2	chalcone synthase	NM_001247107	Solyc05g053550.2.1							0.00390778	0.227433	-4.39689							0.00110073	0.163519	-6.11551	0.018314	0.316521	-3.15935				F:GO:0016210; P:GO:0009813	F:naringenin-chalcone synthase activity; P:flavonoid biosynthetic process	EC:2.3.1.74	Naringenin-chalcone synthase
Les.3650.1.S1_at	778294	CHS1	chalcone synthase	NM_001247104	Solyc09g091510.2.1							0.00901412	0.122813	-8.14244										0.00523442	0.107564	-9.29678				F:GO:0016210; P:GO:0009813	F:naringenin-chalcone synthase activity; P:flavonoid biosynthetic process	EC:2.3.1.74	Naringenin-chalcone synthase
Les.3652.1.S1_at	544092	Q`b	glucan endo-1,3-beta-D-glucosidase	NM_001247229	Solyc10g079860.1.1																0.00115018	4.7666	4.7666	0.00038414	5.13962	5.13962	0.00777431	3.20883	3.20883	C:GO:0048046; P:GO:0006952; F:GO:0042973; P:GO:0005982; P:GO:0005985; C:GO:0046658; F:GO:0030247	C:apoplast; P:defense response; F:glucan endo-1,3-beta-D-glucosidase activity; P:starch metabolic process; P:sucrose metabolic process; C:anchored component of plasma membrane; F:polysaccharide binding	EC:3.2.1.21; EC:3.2.1.39	Beta-glucosidase; Glucan endo-1,3-beta-D-glucosidase
Les.3653.1.S1_at	544091	Q`a	glucan endo-1,3-beta-D-glucosidase	NM_001247226	Solyc04g016470.2.1																			0.0110561	2.57124	2.57124				C:GO:0048046; P:GO:0006952; F:GO:0042973; P:GO:0005982; P:GO:0005985; C:GO:0046658; F:GO:0030247	C:apoplast; P:defense response; F:glucan endo-1,3-beta-D-glucosidase activity; P:starch metabolic process; P:sucrose metabolic process; C:anchored component of plasma membrane; F:polysaccharide binding	EC:3.2.1.21; EC:3.2.1.39	Beta-glucosidase; Glucan endo-1,3-beta-D-glucosidase
Les.3657.1.S1_at	101247772	LOC101247772	heat shock cognate 70 kDa protein 2-like	XM_004249526	Solyc10g086410.2.1																			4.52266e-07	3.9807	3.9807	0.000177181	2.45461	2.45461	F:GO:0005524	F:ATP binding
Les.3659.1.S1_at	544150	LOC544150	dihydroflavonol 4-reductase	NM_001247479	Solyc02g085020.2.1													0.00209906	31.1591	31.1591							0.0196022	12.534	12.534	P:GO:0009718; F:GO:0050662; F:GO:0045552; P:GO:0055114	P:anthocyanin-containing compound biosynthetic process; F:coenzyme binding; F:dihydrokaempferol 4-reductase activity; P:oxidation-reduction process	EC:1.1.1.219	Dihydrokaempferol 4-reductase
Les.3660.1.S1_at	544151	CS2	chorismate synthase 2	NM_001247482	Solyc04g009620.2.1																0.0256479	2.85433	2.85433				0.0043813	3.76023	3.76023	C:GO:0009507; F:GO:0004107; P:GO:0009094; F:GO:0010181; P:GO:0000162; P:GO:0006571; C:GO:0005829; P:GO:0009423	C:chloroplast; F:chorismate synthase activity; P:L-phenylalanine biosynthetic process; F:FMN binding; P:tryptophan biosynthetic process; P:tyrosine biosynthetic process; C:cytosol; P:chorismate biosynthetic process	EC:4.2.3.5	Chorismate synthase
Les.3662.1.S1_at	606304	ACS2	1-aminocyclopropane-1-carboxylate synthase 2	NM_001247249	Solyc01g095080.2.1																0.00771799	6.84146	6.84146				0.000259832	15.0726	15.0726	P:GO:0042218; F:GO:0030170; F:GO:0016847; P:GO:0009693; P:GO:0006520; P:GO:0009835	P:1-aminocyclopropane-1-carboxylate biosynthetic process; F:pyridoxal phosphate binding; F:1-aminocyclopropane-1-carboxylate synthase activity; P:ethylene biosynthetic process; P:cellular amino acid metabolic process; P:fruit ripening	EC:4.4.1.14	1-aminocyclopropane-1-carboxylate synthase
Les.3663.1.S1_at	778293	9612	probable pectate lyase P18	NM_001247100	Solyc02g093580.2.1																						0.00198399	7.83802	7.83802	P:GO:0045490; F:GO:0046872; F:GO:0030570; C:GO:0005576	P:pectin catabolic process; F:metal ion binding; F:pectate lyase activity; C:extracellular region	EC:4.2.2.2	Pectate lyase
Les.3664.1.S1_at	543999	cellulase	endo-1,4-beta-glucanase precursor	NM_001247953	Solyc09g075360.2.1																0.0168263	0.225312	-4.4383	0.000874247	0.125768	-7.95116	0.00216481	0.14896	-6.71321	P:GO:0030245; P:GO:0005982; F:GO:0008810; P:GO:0005985	P:cellulose catabolic process; P:starch metabolic process; F:cellulase activity; P:sucrose metabolic process	EC:3.2.1.4	Cellulase
Les.3666.1.S1_at	543996	Cel2	endo-1,4-beta-glucanase precursor	NM_001247938	Solyc09g010210.2.1																			0.000147527	0.168465	-5.93593	0.00662017	0.30499	-3.27879	P:GO:0030245; P:GO:0005982; F:GO:0008810; P:GO:0005985	P:cellulose catabolic process; P:starch metabolic process; F:cellulase activity; P:sucrose metabolic process	EC:3.2.1.4	Cellulase
Les.3667.1.S1_at	543995	Cel1	endo-1,4-beta-glucanase precursor	NM_001247933	Solyc08g081620.2.1										4.45961e-05	0.0434429	-23.0187							0.0448856	0.26821	-3.72842	0.000123821	0.053554	-18.6727	P:GO:0030245; P:GO:0005982; F:GO:0008810; P:GO:0005985	P:cellulose catabolic process; P:starch metabolic process; F:cellulase activity; P:sucrose metabolic process	EC:3.2.1.4	Cellulase
Les.3668.1.S1_at	543994	LOX1.1	lipoxygenase	NM_001247927	Solyc08g014000.2.1																						0.0312415	2.46516	2.46516	C:GO:0005737; F:GO:0046872; P:GO:0031408; F:GO:0016165; P:GO:0055114	C:cytoplasm; F:metal ion binding; P:oxylipin biosynthetic process; F:linoleate 13S-lipoxygenase activity; P:oxidation-reduction process	EC:1.13.11; EC:1.13.11.12	Acting on single donors with incorporation of molecular oxygen (oxygenases). The oxygen incorporated need not be derived from O(2); Linoleate 13S-lipoxygenase
Les.367.1.A1_at	101259549	LOC101259549	biotin carboxyl carrier protein of acetyl-CoA carboxylase 2, chloroplastic-like	XM_004241551	Solyc06g069530.2.1																			8.73722e-05	0.475078	-2.10492				C:GO:0009570; C:GO:0009507; F:GO:0003989; P:GO:0006629; C:GO:0009941; P:GO:0006633; C:GO:0009317; P:GO:0006090; P:GO:0006631; C:GO:0009536	C:chloroplast stroma; C:chloroplast; F:acetyl-CoA carboxylase activity; P:lipid metabolic process; C:chloroplast envelope; P:fatty acid biosynthetic process; C:acetyl-CoA carboxylase complex; P:pyruvate metabolic process; P:fatty acid metabolic process; C:plastid	EC:6.4.1.2	Acetyl-CoA carboxylase
Les.3670.1.S1_at	543985	GPA1	G protein alpha subunit	NM_001247863	Solyc08g061220.2.1																0.00823697	2.11055	2.11055				0.000453264	2.74081	2.74081	F:GO:0005525; P:GO:0034260; F:GO:0005095; P:GO:0007186; F:GO:0046872; F:GO:0003924; F:GO:0031683; F:GO:0004871; P:GO:0006810; F:GO:0016247; C:GO:0005742	F:GTP binding; P:negative regulation of GTPase activity; F:GTPase inhibitor activity; P:G-protein coupled receptor signaling pathway; F:metal ion binding; F:GTPase activity; F:G-protein beta/gamma-subunit complex binding; F:signal transducer activity; P:transport; F:channel regulator activity; C:mitochondrial outer membrane translocase complex	EC:3.6.1.15	Nucleoside-triphosphate phosphatase
Les.3672.1.S1_at	543977	LOC543977	5-enolpyruvylshikimate-3-phosphate synthase	XM_004229755	Solyc01g091190.2.1																0.000195632	2.06956	2.06956							C:GO:0009507; F:GO:0003866; P:GO:0009094; P:GO:0000162; P:GO:0006571; P:GO:0009423	C:chloroplast; F:3-phosphoshikimate 1-carboxyvinyltransferase activity; P:L-phenylalanine biosynthetic process; P:tryptophan biosynthetic process; P:tyrosine biosynthetic process; P:chorismate biosynthetic process	EC:2.5.1.19	3-phosphoshikimate 1-carboxyvinyltransferase
Les.3673.1.S1_at	543986	LOC543986	beta-1,3-glucanase	NM_001247869	Solyc01g008620.2.1							0.020082	9.92737	9.92737							0.000331983	59.33	59.33	0.0019533	23.6354	23.6354	0.00463159	17.921	17.921	C:GO:0005615; P:GO:0006952; F:GO:0042973; P:GO:0005982; P:GO:0005985; C:GO:0046658; F:GO:0030247	C:extracellular space; P:defense response; F:glucan endo-1,3-beta-D-glucosidase activity; P:starch metabolic process; P:sucrose metabolic process; C:anchored component of plasma membrane; F:polysaccharide binding	EC:3.2.1.21; EC:3.2.1.39	Beta-glucosidase; Glucan endo-1,3-beta-D-glucosidase
Les.3674.1.S1_at	544237	LOC544237	dihydrolipoamide dehydrogenase precursor	NM_001247841	Solyc05g053300.2.1																			9.67147e-07	0.343489	-2.9113				C:GO:0005623; P:GO:0006094; P:GO:0006118; F:GO:0050660; P:GO:0006096; P:GO:0006563; P:GO:0045454; P:GO:0006099; F:GO:0004148; F:GO:0034602; P:GO:0006544; P:GO:0006566	C:cell; P:gluconeogenesis; P:obsolete electron transport; F:flavin adenine dinucleotide binding; P:glycolytic process; P:L-serine metabolic process; P:cell redox homeostasis; P:tricarboxylic acid cycle; F:dihydrolipoyl dehydrogenase activity; F:oxoglutarate dehydrogenase (NAD+) activity; P:glycine metabolic process; P:threonine metabolic process	EC:1.8.1.4	Dihydrolipoyl dehydrogenase
Les.3676.1.S1_at	544113	THM18	myb-related transcription factor	NM_001247333	Solyc06g053610.2.1										0.0305855	2.55953	2.55953				0.00944209	3.44317	3.44317	7.11377e-05	7.26431	7.26431	0.000278242	5.96912	5.96912	F:GO:0003677	F:DNA binding
Les.3679.1.S1_at	606712	ERF1	ethylene-responsive factor 1	NM_001247912	Solyc05g051200.1.1							0.0427842	2.35859	2.35859							0.000968309	4.92909	4.92909	0.00959289	3.04169	3.04169	0.0230288	2.65139	2.65139	C:GO:0005634; F:GO:0003677; C:GO:0005667; F:GO:0003700; P:GO:0006355; P:GO:0006355	C:nucleus; F:DNA binding; C:transcription factor complex; F:transcription factor activity, sequence-specific DNA binding; P:regulation of transcription, DNA-templated; P:regulation of transcription, DNA-templated
Les.3681.1.S1_at	543709	LOC543709	uncharacterized LOC543709	NM_001247747	Solyc10g009030.2.1																0.000545045	0.463378	-2.15806	0.000584887	0.489495	-2.04292	7.73002e-06	0.34944	-2.86172	F:GO:0042284; C:GO:0016021; P:GO:0055114; P:GO:0030148	F:sphingolipid delta-4 desaturase activity; C:integral component of membrane; P:oxidation-reduction process; P:sphingolipid biosynthetic process
Les.3683.1.S1_at	543837	PR-5	PR-5x	NM_001247232	Solyc08g080620.1.1				0.0262401	12.9662	12.9662	0.000166065	103.048	103.048							5.21761e-06	614.17	614.17	1.60784e-05	251.109	251.109	0.00126077	43.9865	43.9865	P:GO:0031640; P:GO:0050832; C:GO:0005773	P:killing of cells of other organism; P:defense response to fungus; C:vacuole
Les.3684.1.A1_at	543757	pi2	cyclophilin-like protein	XM_004245148	Solyc08g067090.2.1																0.00970658	2.10836	2.10836							F:GO:0003755; P:GO:0000413; F:GO:0016853	F:peptidyl-prolyl cis-trans isomerase activity; P:protein peptidyl-prolyl isomerization; F:isomerase activity	EC:5.2.1.8	Peptidylprolyl isomerase
Les.3686.1.S1_at	544307	THT7-8	N-hydroxycinnamoyl-CoA:tyramine N-hydroxycinnamoyl transferase THT7-8	NM_001247093	Solyc08g068780.1.1	0.0140032	0.404807	-2.47031				0.000354309	3.6718	3.6718							0.000271318	4.06203	4.06203	2.02766e-05	5.1305	5.1305	2.64325e-06	6.90088	6.90088	P:GO:0008272; P:GO:0042967; F:GO:0050366; F:GO:0008080; C:GO:0044459; F:GO:0015116	P:sulfate transport; P:acyl-carrier-protein biosynthetic process; F:tyramine N-feruloyltransferase activity; F:N-acetyltransferase activity; C:plasma membrane part; F:sulfate transmembrane transporter activity	EC:2.3.1.110	Tyramine N-feruloyltransferase
Les.3687.1.S1_at	543835	THT7-1	N-hydroxycinnamoyl-CoA:tyramine N-hydroxycinnamoyl transferase THT7-1	NM_001247225	Solyc08g068700.1.1	0.000375041	0.419397	-2.38437							0.000487795	0.468952	-2.13241													P:GO:0008272; P:GO:0042967; F:GO:0050366; F:GO:0008080; C:GO:0044459; F:GO:0015116	P:sulfate transport; P:acyl-carrier-protein biosynthetic process; F:tyramine N-feruloyltransferase activity; F:N-acetyltransferase activity; C:plasma membrane part; F:sulfate transmembrane transporter activity	EC:2.3.1.110	Tyramine N-feruloyltransferase
Les.3691.1.S1_at	544201	UCP	UCP protein	NM_001247655	Solyc09g011920.2.1																0.000324394	2.399	2.399							P:GO:0015992; P:GO:0009853; P:GO:0042254; C:GO:0005774; C:GO:0005840; C:GO:0005743; P:GO:0006412; C:GO:0009507; C:GO:0009506; F:GO:0003735; P:GO:0006839; C:GO:0016021; F:GO:0017077	P:proton transport; P:photorespiration; P:ribosome biogenesis; C:vacuolar membrane; C:ribosome; C:mitochondrial inner membrane; P:translation; C:chloroplast; C:plasmodesma; F:structural constituent of ribosome; P:mitochondrial transport; C:integral component of membrane; F:oxidative phosphorylation uncoupler activity
Les.3692.1.S1_at	606713	ERF3-like	ethylene response factor 3-like	NM_001247919	Solyc06g065820.2.1							0.0104878	2.61193	2.61193	0.0413186	2.07665	2.07665										0.00167857	3.41366	3.41366	C:GO:0005634; F:GO:0003677; C:GO:0005667; F:GO:0003700; P:GO:0006355; P:GO:0006355	C:nucleus; F:DNA binding; C:transcription factor complex; F:transcription factor activity, sequence-specific DNA binding; P:regulation of transcription, DNA-templated; P:regulation of transcription, DNA-templated
Les.3697.1.S1_at	543619	XET2	xyloglucan endotransglycosylase LeXET2	NM_001247413	Solyc07g009380.2.1	0.020911	2.45997	2.45997										0.0405622	2.02227	2.02227							0.0114826	2.47997	2.47997	C:GO:0005618; C:GO:0048046; P:GO:0071555; F:GO:0004553; F:GO:0016762; P:GO:0010411; P:GO:0042546	C:cell wall; C:apoplast; P:cell wall organization; F:hydrolase activity, hydrolyzing O-glycosyl compounds; F:xyloglucan:xyloglucosyl transferase activity; P:xyloglucan metabolic process; P:cell wall biogenesis	EC:2.4.1.207	Xyloglucan:xyloglucosyl transferase
Les.37.1.S1_at	544146	LOC544146	chitinase	XM_004233527	Solyc02g061770.2.1							6.73976e-07	13.8507	13.8507							5.43473e-09	40.3047	40.3047	8.05955e-07	12.8389	12.8389	1.01795e-08	29.8175	29.8175	F:GO:0004568; P:GO:0016998; C:GO:0005615; F:GO:0008061; P:GO:0000272; P:GO:0006032; P:GO:0006952	F:chitinase activity; P:cell wall macromolecule catabolic process; C:extracellular space; F:chitin binding; P:polysaccharide catabolic process; P:chitin catabolic process; P:defense response	EC:3.2.1.14	Chitinase
Les.3700.1.S1_at	100736435	Glb1	non-symbiotic hemoglobin class 1	NM_001247569	Solyc07g008240.2.1																			0.000194782	11.9676	11.9676	0.0135464	4.56965	4.56965	F:GO:0019825; C:GO:0009506; F:GO:0046872; C:GO:0005618; C:GO:0005829; C:GO:0005886; F:GO:0020037	F:oxygen binding; C:plasmodesma; F:metal ion binding; C:cell wall; C:cytosol; C:plasma membrane; F:heme binding
[truncated: 2,221 more rows]

## Sheet: M-8 dpi
Affymetrix Probe	Gene ID	Gene Symbol	Gene Title	RefSeq Transcript ID	Tomato Accession (ITAG2.4)	PSTVd-M infection 8 dpi
[truncated: 235 more rows]

## Sheet: M-17 dpi
Affymetrix Probe	Gene ID	Gene Symbol	Gene Title	RefSeq Transcript ID	Tomato Accession (ITAG2.4)	PSTVd-M infection 17 dpi
[truncated: 132 more rows]

[truncated: 6 more sheets: M-24 dpi, M-49 dpi, S23-8 dpi, S23-17 dpi, S23-24 dpi, S23-49 dpi]
