# Supplementary material for: Time-Course Microarray Analysis Reveals Differences between Transcriptional Changes in Tomato Leaves Triggered by Mild and Severe Variants of Potato Spindle Tuber Viroid
Source: Viruses. 2018 May 15;10(5):257. doi: 10.3390/v10050257 (PMC5977250; doi:10.3390/v10050257)
Supplement: Supplementary file 1 [file viruses-10-00257-s001.zip › Table S3.xlsx]

## Sheet: Down-regulated
Table S3. GO term enrichments of different categories. Values in the tables represent the log10[1/p] where p is a p values of the enrichment. Cutoff: p value <0.005.
DOWN-REGULATED
GO ID	GO Name	PSTVd-M				PSTVd-S23
		8 dpi	17 dpi	24 dpi	49 dpi	8 dpi	17 dpi	24 dpi	49 dpi
BIOLOGICAL PROCESS
GO:0009658	chloroplast organization						4.3937	5.61864
GO:0009643	photosynthetic acclimation						3.11164
GO:1901606	alpha-amino acid catabolic process						2.5721
GO:0034599	cellular response to oxidative stress							3.25438
GO:0009813	flavonoid biosynthetic process							3.03759
GO:0000413	protein peptidyl-prolyl isomerization							4.0085	3.30018
GO:0000470	maturation of LSU-rRNA						3.83703		2.26783
GO:0005986	sucrose biosynthetic process						2.79844		4.2152
GO:0006000	fructose metabolic process						2.96547		4.46101
GO:0006334	nucleosome assembly							4.80623	3.99404
GO:0009704	de-etiolation						2.64263		2.66396
GO:0009735	response to cytokinin						2.5924	3.1826	7.10343
GO:0009768	photosynthesis, light harvesting in photosystem I			13.5375			9.43009		13.734
GO:0009773	photosynthetic electron transport in photosystem I						4.1733	3.13337	7.51123
GO:0010027	thylakoid membrane organization						7.28879	5.42152	8.77307
GO:0015995	chlorophyll biosynthetic process						4.75379		6.24154
GO:0015996	chlorophyll catabolic process							2.73597	3.64928
GO:0016117	carotenoid biosynthetic process						2.97434	6.03183	4.163
GO:0018298	protein-chromophore linkage			13.5375			7.97739		10.2013
GO:0030245	cellulose catabolic process							5.55975	3.79351
GO:0030388	fructose 1,6-bisphosphate metabolic process						3.16051		4.75257
GO:0032544	plastid translation							4.87369	6.11783
GO:0042793	transcription from plastid promoter							3.7358	3.42609
GO:0045038	protein import into chloroplast thylakoid membrane				4.0086		2.64263		2.66396
GO:0045454	cell redox homeostasis							4.1929	5.02569
GO:0046686	response to cadmium ion						2.54821		3.36264
GO:0070208	protein heterotrimerization						3.11164		3.13317
GO:0006342	chromatin silencing								4.25282
GO:0010196	nonphotochemical quenching								4.10729
GO:0006094	gluconeogenesis								3.90865
GO:0042742	defense response to bacterium								3.58061
GO:0009409	response to cold								3.21457
GO:0048564	photosystem I assembly								3.19192
GO:0009649	entrainment of circadian clock								3.13317
GO:0061077	chaperone-mediated protein folding								3.04771
GO:0031640	killing of cells of other organism				4.0086
CELLULAR COMPONENT
GO:0009535	chloroplast thylakoid membrane			7.97516	6.35472		30.1347
GO:0009941	chloroplast envelope			7.1495			23.4119	18.5644
GO:0010287	plastoglobule			11.3152			8.89152	3.94778	19.053
GO:0010598	NAD(P)H dehydrogenase complex (plastoquinone)						3.39446	3.7358	5.11107
GO:0098572	stromal side of plastid thylakoid membrane						3.11164		3.13317
GO:0009508	plastid chromosome						2.79844	4.62583	4.2152
GO:0009543	chloroplast thylakoid lumen						2.79844	4.62583	5.77551
GO:0000427	plastid-encoded plastid RNA polymerase complex							4.02988
GO:0005840	ribosome							4.68915
GO:0009654	photosystem II oxygen evolving complex							2.95778	8.5552
GO:0010319	stromule				4.40364				6.50025
GO:0019898	extrinsic component of membrane								4.93287
GO:0048046	apoplast								4.74648
GO:0009538	photosystem I reaction center								4.0028
GO:0009840	chloroplastic endopeptidase Clp complex								3.71824
GO:0022626	cytosolic ribosome								3.24633
GO:0009515	granal stacked thylakoid								3.13317
GO:0030093	chloroplast photosystem I								3.13317
GO:0009533	chloroplast stromal thylakoid								3.13317
GO:0009523	photosystem II			11.2688
GO:0009522	photosystem I			8.8497
MOLECULAR FUNCTION
GO:0031409	pigment binding			13.5375			9.43009		13.734
GO:0016168	chlorophyll binding			12.3414			8.07033		12.5787
GO:0005525	GTP binding						5.46825		3.16113
GO:0003924	GTPase activity			3.28626			4.89015		2.94036
GO:0016630	protochlorophyllide reductase activity			4.12855			4.66814	2.87245	4.70045
GO:0003735	structural constituent of ribosome						3.64231	3.50637	8.253
GO:0019904	protein domain specific binding						3.43689		4.57296
GO:0042132	fructose 1,6-bisphosphate 1-phosphatase activity						3.16051		4.75257
GO:0004455	ketol-acid reductoisomerase activity						3.11164
GO:0005200	structural constituent of cytoskeleton						3.09682		5.23223
GO:0008810	cellulase activity							5.70675	3.90865
GO:0046982	protein heterodimerization activity							4.31228	8.83028
GO:0003755	peptidyl-prolyl cis-trans isomerase activity							4.0085	3.30018
GO:0005528	FK506 binding							3.40868	3.01434
GO:0015250	water channel activity							3.38091
GO:0016767	geranylgeranyl-diphosphate geranylgeranyltransferase activity							3.34337
GO:0016210	naringenin-chalcone synthase activity			4.60424				3.34337
GO:0030332	cyclin binding							3.34337
GO:0034256	chlorophyll(ide) b reductase activity								3.13317
GO:0008266	poly(U) RNA binding								3.13317
GO:0015266	protein channel activity								3.12146
GO:0009001	serine O-acetyltransferase activity	4.17889
GO:0003700	transcription factor activity, sequence-specific DNA binding	4.45728

## Sheet: Up-regulated
Table S3. GO term enrichments of different categories. Values in the tables represent the log10[1/p] where p is a p values of the enrichment. Cutoff: p value <0.005.
UP-REGULATED
GO ID	GO Name	PSTVd-M				PSTVd-S23
		8 dpi	17 dpi	24 dpi	49 dpi	8 dpi	17 dpi	24 dpi	49 dpi
BIOLOGICAL PROCESS
GO:0006099	tricarboxylic acid cycle						6.09067
GO:0009407	toxin catabolic process						5.76913	3.00859	4.41707
GO:0009835	fruit ripening		5.24422	5.57728			4.8244	2.85215	4.56915
GO:0045454	cell redox homeostasis						4.56521
GO:0009423	chorismate biosynthetic process						4.52684
GO:0015866	ADP transport						4.15256		2.81933
GO:0070973	protein localization to endoplasmic reticulum exit site						3.94325
GO:0006032	chitin catabolic process						3.89957		3.61224
GO:0009693	ethylene biosynthetic process			3.97523			3.6532	2.94413	3.45085
GO:0010105	negative regulation of ethylene-activated signaling pathway		3.93784				3.41573
GO:1990559	mitochondrial coenzyme A transmembrane transport						3.28615
GO:0018106	peptidyl-histidine phosphorylation		3.60885				2.90283
GO:0031640	killing of cells of other organism			6.51234			2.81565	5.45071	4.77057
GO:0050832	defense response to fungus			7.90008			2.47675	4.26352	3.63827
GO:0045899	positive regulation of RNA polymerase II transcriptional preinitiation complex assembly						2.36086		3.32506
GO:0072321	chaperone-mediated protein transport	4.47897
GO:0045039	protein import into mitochondrial inner membrane	3.95799
GO:0006207	'de novo' pyrimidine nucleobase biosynthetic process	3.63768				4.31379
GO:0019919	peptidyl-arginine methylation, to asymmetrical-dimethyl arginine	3.51369
GO:0000470	maturation of LSU-rRNA	3.41988
GO:0034969	histone arginine methylation	3.30954
GO:0000056	ribosomal small subunit export from nucleus	3.30954
GO:0009089	lysine biosynthetic process via diaminopimelate	3.22334
GO:0000730	DNA recombinase assembly	3.14511
GO:0042148	strand invasion	3.14511
GO:0055114	oxidation-reduction process			5.31422
GO:0010200	response to chitin			3.63334
GO:0006749	glutathione metabolic process							5.42702	6.02579
GO:0031167	rRNA methylation					3.13226
GO:0098869	cellular oxidant detoxification							4.89973
GO:0009740	gibberellic acid mediated signaling pathway							2.96834
GO:0006769	nicotinamide metabolic process							3.63298
GO:0009686	gibberellin biosynthetic process							3.4223
GO:0042744	hydrogen peroxide catabolic process							3.34984
GO:0034599	cellular response to oxidative stress							3.25216
CELLULAR COMPONENT
GO:0031428	box C/D snoRNP complex	11.6401				7.16398
GO:0032040	small-subunit processome	7.92976				6.072
GO:0042719	mitochondrial intermembrane space protein transporter complex	4.47897
GO:0045252	oxoglutarate dehydrogenase complex						4.33544
GO:0009506	plasmodesma						3.24928
GO:0005615	extracellular space						2.61899		3.83712
GO:0005777	peroxisome							3.5309
GO:0005789	endoplasmic reticulum membrane								3.85242
GO:0031595	nuclear proteasome complex								3.10141
MOLECULAR FUNCTION
GO:0030515	snoRNA binding	4.33375				3.31978
GO:0004364	glutathione transferase activity						9.02098	4.80153	6.4698
GO:0010181	FMN binding						5.55203		3.28582
GO:0005509	calcium ion binding						5.24294	2.7474	5.5906
GO:0031418	L-ascorbic acid binding			3.49248			4.15256		5.09139
GO:0030976	thiamine pyrophosphate binding						4.11145		3.90599
GO:0004568	chitinase activity						3.89957		3.61224
GO:0051740	ethylene binding		4.0833				3.65134
GO:0038199	ethylene receptor activity		4.0833				3.65134
GO:0004459	L-lactate dehydrogenase activity						3.28615		3.1799
GO:0004591	oxoglutarate dehydrogenase (succinyl-transferring) activity						3.28615
GO:0042973	glucan endo-1,3-beta-D-glucosidase activity						3.21902	5.44536	3.06443
GO:0005524	ATP binding						3.14554
GO:0016688	L-ascorbate peroxidase activity						2.52123	4.85363
GO:0009815	1-aminocyclopropane-1-carboxylate oxidase activity			3.56541			2.52123
GO:0020037	heme binding							6.45319
GO:0005506	iron ion binding							4.30284
GO:0030170	pyridoxal phosphate binding							3.79226	3.31326
GO:0008936	nicotinamidase activity							3.63298
GO:0004130	cytochrome-c peroxidase activity							3.40628
GO:0045544	gibberellin 20-oxidase activity							3.40628
GO:0043565	sequence-specific DNA binding								4.01244
GO:0003700	transcription factor activity, sequence-specific DNA binding								5.77897
GO:0036402	proteasome-activating ATPase activity								3.20902
GO:0004106	chorismate mutase activity								3.1799
GO:0035242	protein-arginine omega-N asymmetric methyltransferase activity	3.51369
GO:0008469	histone-arginine N-methyltransferase activity	3.4055
GO:0051082	unfolded protein binding	3.34365
GO:0000150	recombinase activity	3.14511
GO:0000400	four-way junction DNA binding	3.07351
GO:0009916	alternative oxidase activity			3.34551
