# Supplementary material for: Time-Course Microarray Analysis Reveals Differences between Transcriptional Changes in Tomato Leaves Triggered by Mild and Severe Variants of Potato Spindle Tuber Viroid
Source: Viruses. 2018 May 15;10(5):257. doi: 10.3390/v10050257 (PMC5977250; doi:10.3390/v10050257)
Supplement: Supplementary file 1 [file viruses-10-00257-s001.zip › Table S4.xlsx]

## Sheet: TF
Table S4. TF and PK genes in which expression was altered by PSTVd infection at particular time points.
Family	Gene ID	Gene Symbol	NCBI description	Fold Change (PSTVd-M)				Fold Change (PSTVd-S23)
				8 dpi	17 dpi	24 dpi	49 dpi	8 dpi	17 dpi	24 dpi	49 dpi
AP2/ERF-AP2	Solyc02g064960.2.1	AP2b	AP2 transcription factor SlAP2b								4.40034
	Solyc02g093150.2.1	LOC100736534	AP2 transcription factor SlAP2c								2.0032
AP2/ERF-ERF	Solyc01g065980.2.1	LOC101055565	ERF6							3.23026
	Solyc03g093610.1.1	LOC101267589	ethylene-responsive transcription factor 1-like		6.56213	4.75511	3.50486		27.0224		5.94245
	Solyc03g120840.1.1	LOC101259323	dehydration-responsive element-binding protein 3-like			-2.42015				-2.61415	-2.13549
	Solyc04g054910.2.1	LOC101264209	ethylene-responsive transcription factor RAP2-4-like							2.77455
	Solyc04g072900.1.1	DREB3	dehydration-responsive element binding protein 3				-2.21337
	Solyc04g078640.1.1	LOC101248770	ethylene-responsive transcription factor ERF010-like	-2.36433			-2.06455
	Solyc05g051200.1.1	ERF1	ethylene-responsive factor 1			2.35859			4.92909	3.04169	2.65139
	Solyc05g052030.1.1	ERF4	ethylene response factor 4				-2.35142
	Solyc05g052050.1.1	LOC544041	Pti4		3.04722		-3.32841		5.22254	-2.54167	2.31032
	Solyc06g065820.2.1	ERF3-like	ethylene response factor 3-like			2.61193	2.07665				3.41366
	Solyc06g066540.1.1	LOC101252194	dehydration-responsive element-binding protein 3-like				3.23406			-5.53403
	Solyc06g082590.1.1	LOC544043	Pti6			2.63401			3.869	3.07597	4.61275
	Solyc07g053740.1.1	LOC101249381	ethylene-responsive transcription factor 4-like						2.38946
	Solyc09g075420.2.1	ERF2	ethylene response factor 2							-2.51288
	Solyc09g089930.1.1	EREB	ethylene responsive element binding protein		11.718	5.48496			23.5083		3.65489
	Solyc10g009110.1.1	ERF3	ethylene response factor 2						4.16724
	Solyc12g049560.1.1	LOC101261693	ethylene-responsive transcription factor RAP2-12-like	-2.45695
AP2/ERF-RAV	Solyc04g007000.1.1	RAV1	AP2/ERF and B3 domain-containing transcription factor RAV1-like		6.62231		-6.07819			-4.36505
B3-ARF	Solyc02g077560.2.1	ARF3	auxin response factor 3		-14.328	-9.4868
	Solyc08g082630.2.1	ARF9	auxin response factor 9			-3.60045				-5.15985	-3.82572
BBR-BPC	Solyc02g084230.1.1	BBR/BPC2	GAGA-binding transcriptional activator						-2.58935
	Solyc04g008380.2.1	BBR/BPC1	GAGA-binding transcriptional activator						-5.56881		-3.53713
bHLH	Solyc01g109700.2.1	LOC101252729	transcription factor bHLH63-like	-2.37696					-2.7371
	Solyc03g005350.2.1	LOC101258920	transcription factor UNE12-like								2.39782
	Solyc03g118310.2.1	LOC101266110	transcription factor ICE1-like							-7.41989	-10.7846
	Solyc04g005280.2.1	LOC101254588	transcription factor BIM2-like								2.68111
	Solyc05g007210.2.1	LOC101261116	transcription factor bHLH135-like				3.25459				-2.72667
	Solyc06g065040.2.1	LOC101256189	transcription factor bHLH80-like	-2.4883
	Solyc06g068870.2.1	ICE1a	transcription factor ICE1-like	-2.07849					-3.63757	-2.17518	-2.84864
	Solyc07g043580.2.1	LOC101252303	transcription factor PIF1-like							2.06668
	Solyc07g064040.2.1	LOC101259956	transcription factor ILR3-like						-2.65046
	Solyc08g076820.2.1	LOC101055515	Hop-interacting protein THI018			-2.89171			-7.56632	-6.36969	-21.3091
	Solyc08g076930.1.1	JA3	jasmonic acid 3							2.8115	2.00364
	Solyc09g063010.2.1	LOC101264668	transcription factor PIF1								2.52389
	Solyc12g100140.1.1	LOC101246034	transcription factor bHLH122-like						-2.07919	-2.321
bZIP	Solyc01g100460.2.1	abz1	anaerobic basic leucine zipper protein						2.68929		6.07237
	Solyc01g109880.2.1	ZIP	bZIP transcription factor							2.85329
	Solyc01g111580.2.1	LOC101266077	uncharacterized LOC101266077	-2.10509
	Solyc04g072460.2.1	LOC101265431	transcription factor TGA1-like						3.73175	2.76952	4.49477
	Solyc04g078840.2.1	AREB	AREB-like protein	-3.35431				-2.85774
	Solyc04g081190.2.1	vsf-1	vsf-1 protein								2.14233
	Solyc06g060490.2.1	LOC101257481	transcription factor VIP1-like						2.42388		2.07062
	Solyc07g062710.2.1	LOC101263229	probable transcription factor PosF21-like						-4.17015	-4.5988	-3.44654
	Solyc08g006110.2.1	LOC101259353	basic leucine zipper 9-like						2.30325	2.35252
	Solyc08g061130.2.1	HY5	THY5 protein								2.85666
	Solyc10g080770.1.1	NIF1	NPR1-interactor protein 1								2.64695
	Solyc11g044560.1.1	SlABF4	ABA responsive transcription factor							2.21889
C2C2-CO-like	Solyc03g119540.2.1	LOC101254370	zinc finger protein CONSTANS-LIKE 6-like				-5.91585		-5.77086		-19.7478
	Solyc07g006630.2.1	LOC100191137	CONSTANS-like protein				-7.82489		-22.4541	5.95587	-8.2458
	Solyc08g006530.2.1	LOC101268413	zinc finger protein CONSTANS-LIKE 4-like						-6.75079		-7.7239
	Solyc12g096500.1.1	LOC101254368	zinc finger protein CONSTANS-LIKE 4-like						-2.12354	2.37081
C2C2-Dof	Solyc06g069760.2.1	LOC101255410	dof zinc finger protein DOF5.2-like				-2.65375		-5.80717		-3.10902
	Solyc11g072500.1.1	LOC101250661	dof zinc finger protein DOF5.3-like						-3.57325
C2C2-GATA	Solyc03g120890.2.1	LOC101258142	GATA transcription factor 12-like							-5.04315
	Solyc05g056120.2.1	LOC101251289	GATA transcription factor 9-like			-2.12469			-2.81333
C2C2-LSD	Solyc08g077060.2.1	LOC101265355	protein LOL1-like						-3.36617	-3.36174	-11.3662
C2C2-YABBY	Solyc07g008180.2.1	LOC101247536	axial regulator YABBY 5-like						-3.22986	-3.86933	-2.85817
C2H2	Solyc01g107170.2.1	ZF2	ZF2 protein								12.0424
	Solyc03g121660.2.1	LOC101264502	zinc finger protein NUTCRACKER-like						2.26598
	Solyc04g080130.2.1	LOC101254481	uncharacterized LOC101254481			2.08748					3.11816
	Solyc05g054650.1.1	LOC101259441	zinc finger protein ZAT11-like						2.54387		7.35539
	Solyc06g036060.2.1	---	Zinc finger, C2H2						4.1477		2.68832
	Solyc06g068390.1.1	LOC101258965	zinc finger protein 3-like							-5.8532
	Solyc06g075250.2.1	LOC101261125	protein indeterminate-domain 9	-2.11481
	Solyc06g075780.1.1	LOC101254394	zinc finger protein ZAT12-like			4.68709					5.01304
	Solyc10g077110.1.1	LOC100037495	transcription factor IIIA						-3.34265		-3.35534
	Solyc11g073060.1.1	LOC101261583	zinc finger protein ZAT11-like			5.48874
	Solyc12g088390.1.1	LOC101254884	zinc finger protein ZAT10-like						4.3829		10.3172
C3H	Solyc01g014850.2.1	LOC101262841	zinc finger CCCH domain-containing protein 14-like						-2.04816
	Solyc01g067550.2.1	LOC101268508	zinc finger CCCH domain-containing protein 58-like						-2.14279
	Solyc01g087030.2.1	LOC101268612	E3 ubiquitin-protein ligase makorin-like	-2.51475
	Solyc01g110490.2.1	LOC101268622	tRNA-dihydrouridine(47) synthase [NAD(P)(+)]-like						-2.68042
CPP	Solyc07g020710.2.1	LOC101249098	protein tesmin/TSO1-like CXC 5-like						2.59416		2.20895
DBB	Solyc12g089240.1.1	LOC101247504	probable salt tolerance-like protein At1g75540-like		2.40071
EIL	Solyc01g009170.2.1	EIL2	EIL2 protein							2.08034
	Solyc06g073720.1.1	EIL1	EIL1 protein		2.29119
	Solyc06g073730.1.1	EIL4	EIN3-like protein								2.7993
GARP-G2-like	Solyc01g108300.2.1	LOC101243935	Myb family transcription factor				-6.12622			3.4513
	Solyc06g076350.2.1	LOC101244879	uncharacterized LOC101244879		3.19357					-6.91003
	Solyc10g080960.1.1	LOC101249222	putative two-component response regulator ARR13-like				2.63631
GRAS	Solyc03g025170.1.1	GRAS10	GRAS10 protein						-2.03556
	Solyc04g064550.1.1	GRAS6	GRAS6 protein	-2.01458
	Solyc05g053090.1.1	LOC101246721	scarecrow-like protein 14-like						6.45341	6.34876	5.52082
	Solyc06g076280.1.1	LOC101246637	scarecrow-like protein 14-like						2.13332
	Solyc11g011260.1.1	GAI	GAI-like protein							-2.45337
HB-BELL	Solyc08g065420.2.1	BL4	bell-like homeodomain protein 4						-2.469	-2.97301
HB-HD-ZIP	Solyc01g090460.2.1	THOM1	HD-ZIP protein			-2.23534					-3.5174
	Solyc03g120910.2.1	LOC101257548	homeobox-leucine zipper protein ATHB-15-like				2.01073
	Solyc04g074700.2.1	h52	homeodomain protein				2.1772			2.09354	2.06612
	Solyc05g007180.2.1	JA1	jasmonic acid 1						-2.35788
HB-KNOX	Solyc02g081120.2.1	T6	class I knotted-like homeodomain protein							-4.83345
	Solyc08g041820.2.1	LOC101261052	homeobox protein knotted-1-like 3-like						-3.50418
HB-WOX	Solyc02g082670.2.1	LOC101258516	WUSCHEL-related homeobox 8-like								3.6454
HSF	Solyc02g090820.2.1	HSTF24	heat shock factor protein HSF24			3.74134	3.43981		8.78821	3.57162	9.79154
	Solyc03g006000.2.1	LOC101247401	heat stress transcription factor A-4a-like						2.52109		2.71052
	Solyc06g053960.2.1	LOC101257776	heat stress transcription factor A-6b-like								2.18692
	Solyc08g062960.2.1	LOC101255223	heat shock factor protein HSF30-like						-2.13821
LBD	Solyc02g092550.2.1	LOC101258116	LOB domain-containing protein 37-like				-7.47762				-3.14525
	Solyc03g119530.2.1	LOC101257056	LOB domain-containing protein 41-like				-6.38801				-4.01264
	Solyc11g072470.1.1	LOC101249045	LOB domain-containing protein 1-like				3.89153		7.70158	3.99791	42.1738
LIM	Solyc03g114000.2.1	LOC101254468	pollen-specific protein SF3-like				2.01787				2.42486
	Solyc04g077780.2.1	LOC101257855	pollen-specific protein SF3-like							-2.17305
MADS-MIKC	Solyc02g071730.2.1	LOC543840	TAG1 transcription factor								7.6119
	Solyc02g089210.2.1	LOC104645706	truncated transcription factor CAULIFLOWER A							-2.03709
	Solyc03g006830.2.1	---	MADS-box transcription factor 2	-2.52314				-3.40913
	Solyc06g069430.2.1	LeFUL1	TDR4 transcription factor							3.31675	12.0229
	Solyc12g087830.1.1	LOC101247413	protein MADS AFFECTING FLOWERING 5	-45.8939	-6.6875
MYB	Solyc02g088190.2.1	LOC101250177	uncharacterized LOC101250177				-2.15024				-2.07731
	Solyc02g092930.1.1	LOC101249225	transcription factor MYB44-like						-2.9274
	Solyc03g119370.1.1	LOC101266622	transcription factor MYB108-like								2.25493
	Solyc04g014470.2.1	LOC101268562	protein ODORANT1-like				2.81142			2.90725	2.71465
	Solyc05g055240.2.1	MYBI	I-box binding factor								2.2876
	Solyc06g053610.2.1	THM18	myb-related transcription factor				2.55953		3.44317	7.26431	5.96912
	Solyc06g065100.2.1	LOC101255895	myb-related protein 330-like	-2.2562				-2.43654	2.51816	-3.24601
	Solyc09g010840.1.1	LOC543604	phantastica							-2.76037
	Solyc09g090130.2.1	LOC101252819	myb-related protein Myb4-like			2.21947	2.22399		6.26795		5.95937
	Solyc11g006720.1.1	LOC101262372	transcription factor DIVARICATA-like								2.73266
	Solyc11g011050.1.1	THM16	myb-related transcription factor				2.70283		2.37698		4.94086
	Solyc11g073120.1.1	LOC101262486	transcription factor MYB48-like							32.6797	16.7505
MYB-related	Solyc01g096700.2.1	LOC101246382	dnaJ homolog subfamily C member 2-like						-3.7337		-2.67282
	Solyc02g036370.2.1	LOC101261079	protein REVEILLE 1	-4.70162		2.19733		-10.93		-4.63293	3.67391
	Solyc03g098320.2.1	LOC101255972	protein REVEILLE 7						-2.89757	10.744
	Solyc03g113620.2.1	LOC101262503	transcription factor MYB1R1-like						-8.03303		-3.43046
	Solyc04g005100.2.1	LOC101257759	transcription factor MYB1R1-like			12.672	5.79911		11.1769	9.77692	16.5946
	Solyc06g075660.2.1	LOC101255305	transcription factor MYB48-like	-2.76748						4.0439	3.65151
	Solyc08g078340.2.1	LOC101262741	transcription factor MYB1R1-like	-2.64322
	Solyc10g005080.2.1	LOC101261662	protein LHY-like							2.82333	2.34376
	Solyc10g052470.1.1	fsm1	SANT/MYB domain protein							-8.17528
NAC	Solyc03g115850.2.1	LOC101243692	NAC domain-containing protein 100-like								2.61188
	Solyc04g005610.2.1	LOC101248665	NAC transcription factor 29-like							3.17181	2.76083
	Solyc04g009440.2.1	NAC1	NAC domain protein		5.07787	8.86173	5.16481		79.8086		31.0462
	Solyc04g079940.2.1	LOC101250112	uncharacterized LOC101250112						5.77403	2.3083	3.23011
	Solyc05g007770.2.1	LOC101244582	NAC transcription factor 29-like				-2.6118			3.87665
	Solyc05g055470.2.1	LOC101265827	NAC domain-containing protein 78-like								2.73727
	Solyc06g061080.2.1	LOC101244385	NAC domain-containing protein 86-like						4.13865
	Solyc07g045030.2.1	LOC101268010	transcription factor JUNGBRUNNEN 1-like						2.26786		2.13265
	Solyc10g055760.1.1	LOC101267943	protein FEZ-like						32.354		5.87812
	Solyc11g017470.1.1	LOC101267475	NAC domain-containing protein 2-like	-3.10397	3.80243				6.60972
	Solyc12g013620.1.1	JA2	jasmonic acid 2		9.84306				18.0337		5.66173
	Solyc12g056790.1.1	SlSRN1	stress-related NAC1						2.29416		2.62341
NF-YA	Solyc01g008490.2.1	LOC101264750	nuclear transcription factor Y subunit A-1-like						-2.01422
	Solyc02g069860.2.1	LOC101260988	nuclear transcription factor Y subunit A-7-like							3.07349
	Solyc08g062210.2.1	LOC101246742	nuclear transcription factor Y subunit A-8-like							2.27867	2.31198
NF-YB	Solyc04g049910.2.1	LOC101251575	nuclear transcription factor Y subunit B-10-like								2.05365
	Solyc07g065500.1.1	LOC101258170	nuclear transcription factor Y subunit B-3-like				-2.27066		-3.84888	-2.87355	-7.55042
	Solyc09g007290.2.1	LOC101258181	nuclear transcription factor Y subunit B-8-like						-2.12116
	Solyc11g068480.1.1	LOC101260506	nuclear transcription factor Y subunit B-like								-3.0666
NF-YC	Solyc03g110860.2.1	LOC101247122	nuclear transcription factor Y subunit C-1-like						-5.53605		-4.10778
	Solyc06g072040.1.1	CIP2a	CONSTANS interacting protein 2a						-3.54344		-5.33076
PLATZ	Solyc08g076860.2.1	LOC101260164	uncharacterized LOC101260164		2.43681	2.33959			2.67933	2.89106
SBP	Solyc01g068100.2.1	LOC101260569	squamosa promoter-binding-like protein 1-like						-6.04872
	Solyc03g114850.2.1	LOC101261007	squamosa promoter-binding-like protein 6-like								-3.67381
	Solyc10g009080.2.1	LOC101246669	squamosa promoter-binding protein 1-like						-8.60844	-5.46833	-19.035
TCP	Solyc06g070900.2.1	TCP17	TCP transcription factor 17						-4.06138	-8.74025	-2.53754
	Solyc07g062680.1.1	LOC543617	cycloidea							-2.86129
	Solyc08g048390.1.1	TCP24	TCP transcription factor 24							-2.31397
	Solyc11g020670.1.1	TCP12	TCP transcription factor 12	-5.35707
	Solyc12g014140.1.1	TCP3	TCP transcription factor 3	2.77658							-2.72891
Tify	Solyc03g122190.2.1	SRG1	salt responsive protein 1						-2.20944		2.93681
	Solyc08g036640.2.1	LOC101252907	protein TIFY 5A-like								4.68014
	Solyc11g011030.1.1	Prg1	Pto-responsive gene 1 protein			4.09807				5.96767
Trihelix	Solyc01g096470.2.1	LOC101266671	trihelix transcription factor ASIL2							2.53732
ULT	Solyc07g054450.2.1	LOC101260246	protein ULTRAPETALA 1-like				2.04408		2.50843		2.22095
Whirly	Solyc05g007100.2.1	LOC101258558	single-stranded DNA-bindig protein WHY1, chloroplastic-like						-2.74657	-3.09597	-3.72194
WRKY	Solyc01g079260.2.1	LOC101263542	probable WRKY transcription factor 23-like	-2.42075		2.44435			3.48509	3.6211	6.48673
	Solyc01g079360.2.1	WRKYIIe-1	WRKY transcription factor IIe-1							2.04399
	Solyc01g095630.2.1	WRKY3	WRKY transcription factor						3.10555		2.51732
	Solyc02g093050.2.1	WRKYIId-4	WRKY transcription factor IId-4						2.81994		3.14326
	Solyc03g095770.2.1	LOC101256570	probable WRKY transcription factor 70-like						6.16141		2.92455
	Solyc03g116890.2.1	LOC101246812	probable WRKY transcription factor 40-like			15.8666	5.56769		32.6606	9.87866	20.6041
	Solyc04g078550.2.1	LOC101247012	probable WRKY transcription factor 7				2.31665				2.9911
	Solyc05g012500.2.1	LOC101247821	probable WRKY transcription factor 57-like				2.4011				4.85992
	Solyc06g008610.2.1	WRKYIId-6	WRKY transcription factor IId-6								2.16489
	Solyc06g066370.2.1	SlWRKY33A	WRKY transcription factor 33A		2.03099				2.3398		2.36313
	Solyc07g055280.2.1	LOC101267623	probable WRKY transcription factor 69-like						3.10539
	Solyc08g008280.2.1	LOC101258576	probable WRKY transcription factor 53-like			3.57304	2.8496		2.75225		3.09693
	Solyc09g015770.2.1	WRKY81	WRKY transcription factor 81						3.49083		3.16684
	Solyc09g066010.2.1	WRKYIId-3	WRKY transcription factor IId-3								2.01339
zf-HD	Solyc03g098060.1.1	LOC101250097	ZF-HD homeobox protein At4g24660-like						-4.65859	-3.23423	-5.41365
	Solyc04g074990.2.1	LOC101247612	ZF-HD homeobox protein At4g24660-like			-2.0645			-2.23373	-4.58991	-2.25689

## Sheet: PK
Family	Gene ID	Gene Symbol	NCBI description	Fold Change (PSTVd-M)				Fold Change (PSTVd-S23)
				8 dpi	17 dpi	24 dpi	49 dpi	8 dpi	17 dpi	24 dpi	49 dpi
AGC_MAST	Solyc06g068920.2.1	LOC101246150	probable serine/threonine protein kinase IREH1						2.22263		2.46393
AGC_PKA-PKG	Solyc05g018300.2.1	LOC101265334	protein phosphatase 2C and cyclic nucleotide-binding/kinase domain-containing protein-l						-3.47649
AGC_RSK-2	Solyc11g067070.1.1	LOC101252554	serine/threonine-protein kinase D6PK-like					-2.29525	-4.9537
AGC_RSK-2	Solyc12g006690.1.1	PK5	protein kinase			-3.28086			-2.59944	-2.54439	-3.93771
AGC-Pl	Solyc03g095510.2.1	LOC101252563	serine/threonine-protein kinase AtPK2/AtPK19-like	3.246				2.608	3.77927	3.40408	3.20648
AGC-Pl	Solyc06g071210.2.1	LOC101246352	serine/threonine-protein kinase AtPK2/AtPK19-like						-2.81485
CAMK_AMPK	Solyc02g067030.2.1	SNF1	SNF1 protein						2.28631
CAMK_AMPK	Solyc03g115700.2.1	LOC543870	SNF1-related protein kinase								2.04827
CAMK_CAMKL-CHK1	Solyc02g021440.2.1	---	CBL-interacting protein kinase 04						2.99439
CAMK_CAMKL-CHK1	Solyc05g052270.1.1	SlCIPK2	CBL-interacting protein kinase	-2.58934			-2.2406	-2.0122			-2.55093
CAMK_CAMKL-CHK1	Solyc05g053210.2.1	LOC101243894	CBL-interacting protein kinase 1-like				-5.19125
CAMK_CAMKL-CHK1	Solyc09g018280.1.1	LOC101254823	CBL-interacting serine/threonine-protein kinase 14	-3.90214				-3.71082		2.22021
CAMK_CAMKL-CHK1	Solyc11g062410.1.1	LOC101258032	CBL-interacting serine/threonine-protein kinase 3-like						-2.21395	-2.07672
CAMK_CDPK	Solyc01g112250.2.1	LOC101258311	calcium-dependent protein kinase 5-like						3.02622
CAMK_CDPK	Solyc03g031670.2.1	cpk1	calcium-dependent protein kinase						2.37974		2.06385
CAMK_CDPK	Solyc03g033540.2.1	LOC100316879	calcium-dependent protein kinase			2.364			2.09094	2.96113
CAMK_CDPK	Solyc03g113390.2.1	LOC101055527	Hop-interacting protein THI080				2.26808		3.35395	2.14264	5.59597
CAMK_CDPK	Solyc04g009800.2.1	CDPK2	calcium dependent protein kinase						2.6588		2.61537
CAMK_CDPK	Solyc04g009900.2.1	LOC543633	phosphoenolpyruvate carboxylase kinase	-2.07851	-4.09552					2.43752	3.30124
CAMK_CDPK	Solyc05g056570.2.1	LOC101264824	calcium-dependent protein kinase SK5-like						4.20501		2.35001
CAMK_OST1L	Solyc04g074500.2.1	LOC101262107	serine/threonine-protein kinase SAPK2-like						2.37274	2.05856	2.56575
CMGC_CDK-Pl	Solyc04g082840.2.1	cdkB2	B2-type cyclin dependent kinase							-6.82841
CMGC_CDK-Pl	Solyc10g074720.1.1	cdkB1	B1-type cyclin dependent kinase							-3.29112
CMGC_GSK	Solyc02g072300.2.1	LOC101249039	shaggy-related protein kinase eta-like						-2.13053
CMGC_GSK	Solyc02g086670.2.1	LOC101254442	shaggy-related protein kinase epsilon	-3.10007				-2.27478		2.3987
CMGC_GSK	Solyc12g062870.1.1	LOC101266803	shaggy-related protein kinase epsilon-like		2.01893					2.03807
CMGC_MAPK	Solyc06g005170.2.1	MPK3	mitogen-activated protein kinase 3			2.28524
CMGC_MAPK	Solyc08g081490.2.1	MAPK7	mitogen-activated protein kinase 7						14.3959		7.52171
CMGC_MAPK	Solyc11g072630.1.1	MAPK4	mitogen-activated protein kinase 4						2.96323		5.09366
Group-Pl-4	Solyc12g021280.1.1	LOC101251157	serine/threonine-protein kinase STN7, chloroplastic-like			-2.07049	-2.17842		-4.05511		-2.26918
RLK-Pelle_CrRLK1L-1	Solyc09g015830.1.1	LOC101259360	receptor-like protein kinase FERONIA-like						-3.2719
RLK-Pelle_DLSV	Solyc02g030300.2.1	LOC101245411	G-type lectin S-receptor-like serine/threonine-protein kinase At4g27290-like							3.6446
RLK-Pelle_DLSV	Solyc02g080070.2.1	LOC101264391	cysteine-rich receptor-like protein kinase 10-like							2.76631
RLK-Pelle_DLSV	Solyc03g005960.2.1	LOC543641	uncharacterized LOC543641							-2.24978
RLK-Pelle_DLSV	Solyc04g007880.2.1	LOC101268273	cysteine-rich receptor-like protein kinase 10-like						3.27979	2.42034	3.15358
RLK-Pelle_LRK10L-2	Solyc02g081510.1.1	---	Receptor-like kinase			3.51176			8.66035	6.32588	5.43554
RLK-Pelle_LRR-I-2	Solyc07g063950.2.1	LOC101244097	uncharacterized LOC101244097	2.24379
RLK-Pelle_LRR-III	Solyc05g052350.2.1	LOC101262918	probable leucine-rich repeat receptor-like protein kinase IMK3-like		-2.04833	-2.10914			-7.85385	-2.54033	-5.84086
RLK-Pelle_LRR-III	Solyc11g011020.1.1	LOC101254257	probable inactive receptor kinase At1g48480-like							-2.39171
RLK-Pelle_LRR-V	Solyc06g063360.2.1	LOC101260543	protein STRUBBELIG-RECEPTOR FAMILY 5-like				2.73859		4.49333		3.9096
RLK-Pelle_LRR-V	Solyc12g055720.1.1	LOC101251660	protein STRUBBELIG-RECEPTOR FAMILY 6-like	-2.44673				-2.16037
RLK-Pelle_LRR-XI-1	Solyc00g009090.2.1	LOC101262905	probable LRR receptor-like serine/threonine-protein kinase At1g34110-like				3.38614
RLK-Pelle_LRR-XI-1	Solyc04g074050.2.1	LOC101266718	probable LRR receptor-like serine/threonine-protein kinase At4g08850							-2.20105
RLK-Pelle_LRR-XI-1	Solyc08g066310.1.1	---	Receptor like kinase				2.1877				2.45357
RLK-Pelle_LRR-XI-2	Solyc06g071810.1.1	LOC101259548	leucine-rich repeat receptor-like serine/threonine/tyrosine-protein kinase SOBIR1-like			3.22052		2.20541	4.08309	2.95124	3.50412
RLK-Pelle_LRR-XIIIb	Solyc08g061560.2.1	LOC101266437	LRR receptor-like serine/threonine-protein kinase ERECTA-like							-2.4377	-5.8781
RLK-Pelle_LysM	Solyc03g121050.2.1	LOC100736483	Lyk3							2.07322
RLK-Pelle_LysM	Solyc07g049180.2.1	Bti9	LysM receptor-like kinase						2.40359		3.03484
RLK-Pelle_PERK-2	Solyc03g121440.2.1	LOC101244940	inactive protein kinase SELMODRAFT_444075-like		-2.01484	-2.05342			-3.07128	-2.49897	-2.27971
RLK-Pelle_RLCK-V	Solyc12g098960.1.1	LOC101247003	probable receptor-like protein kinase At5g18500-like							-2.49756
RLK-Pelle_RLCK-VI	Solyc01g111570.2.1	LOC101265487	probable receptor-like serine/threonine-protein kinase At5g57670-like							-4.31522	-2.36455
RLK-Pelle_RLCK-VIIa-1	Solyc01g067400.2.1	LOC101245581	serine/threonine-protein kinase PBS1-like						2.44551
RLK-Pelle_RLCK-VIIa-1	Solyc05g024290.2.1	LOC101256183	serine/threonine-protein kinase PBS1-like								2.08617
RLK-Pelle_RLCK-VIIa-1	Solyc11g072660.1.1	LOC101254270	probable serine/threonine-protein kinase RLCKVII-like						3.08755	3.30917	2.99045
RLK-Pelle_RLCK-VIIa-2	Solyc01g028830.2.1	LOC101253412	probable receptor-like protein kinase At5g56460-like				2.08549
RLK-Pelle_RLCK-VIIa-2	Solyc01g112220.2.1	LOC101257025	probable serine/threonine-protein kinase Cx32, chloroplastic-like						6.58282		4.83469
RLK-Pelle_RLCK-VIIa-2	Solyc04g011520.2.1	LOC101260038	protein kinase APK1A, chloroplastic-like			2.37998			4.79167		7.14897
RLK-Pelle_RLCK-VIIa-2	Solyc05g007140.2.1	LOC101259436	protein kinase 2B, chloroplastic-like			2.16809			3.02766
RLK-Pelle_RLCK-VIIa-2	Solyc06g062920.2.1	LOC543684	auxin-regulated dual specificity cytosolic kinase						4.66974		3.8068
RLK-Pelle_RLCK-VIIa-2	Solyc08g061250.2.1	LOC101263832	serine/threonine-protein kinase At5g01020-like								4.7677
RLK-Pelle_RLCK-VIIa-2	Solyc08g077630.2.1	---	ATP binding / serine-threonine kinase						2.05933
RLK-Pelle_RLCK-VIIa-2	Solyc09g008010.2.1	LOC101267733	probable receptor-like protein kinase At5g15080-like						4.42566		4.88379
RLK-Pelle_RLCK-VIIa-2	Solyc10g074710.1.1	LOC101256046	serine/threonine-protein kinase At5g01020-like						-3.18847		-3.45678
RLK-Pelle_RLCK-VIII	Solyc12g098820.1.1	LOC101252374	PTI1-like tyrosine-protein kinase 3-like						-6.00939
RLK-Pelle_RLCK-VIII	Solyc12g098980.1.1	Pti1	Pto kinase interactor 1				2.02525		2.5074		2.09449
RLK-Pelle_RLCK-X	Solyc04g045600.2.1	LOC101265327	probable receptor-like protein kinase At1g80640-like							-3.03405	-3.22273
RLK-Pelle_RLCK-XII-1	Solyc11g064890.1.1	LOC543567	hypoxia-induced protein L31						-3.31655
RLK-Pelle_RLCK-XII-2	Solyc06g060690.2.1	LOC101253295	inactive serine/threonine-protein kinase At1g67470-like			4.398	2.58158			4.45404	3.70778
STE_STE11	Solyc06g084160.2.1	LOC101255414	probable serine/threonine-protein kinase BUD32 homolog						-4.07941
STE_STE7	Solyc03g097920.1.1	MKK4	MAPKK			2.88354			2.01177	2.95248	2.08551
STE_STE7	Solyc03g119490.2.1	MKK3	MAPKK							-3.31355
TKL_CTR1-DRK-2	Solyc09g009090.2.1	CTR3	CTR1-like protein kinase						2.47317
TKL_CTR1-DRK-2	Solyc10g083610.1.1	TCTR1	ethylene-inducible CTR1-like protein kinase						2.70747		2.59604
TKL-Pl-4	Solyc02g093410.2.1	LOC101261474	serine/threonine-protein kinase HT1-like						-3.60553	-2.47017	-3.25707
TKL-Pl-4	Solyc03g006400.2.1	LOC101258727	serine/threonine-protein kinase HT1-like						2.8539		4.70731
TKL-Pl-4	Solyc03g114210.2.1	LOC101248565	serine/threonine-protein kinase HT1-like		2.43064				2.4349	-2.74373
TKL-Pl-4	Solyc10g055720.1.1	LOC101268522	tyrosine-protein kinase Srms-like						-3.25522
WNK_NRBP	Solyc06g082470.2.1	LOC101246543	probable serine/threonine-protein kinase WNK4			-4.69994				-4.58777
WNK_NRBP	Solyc07g065250.2.1	LOC101256991	probable serine/threonine-protein kinase WNK11-like						2.27436		2.65983
