# Supplementary material for: Time-Course Microarray Analysis Reveals Differences between Transcriptional Changes in Tomato Leaves Triggered by Mild and Severe Variants of Potato Spindle Tuber Viroid
Source: Viruses. 2018 May 15;10(5):257. doi: 10.3390/v10050257 (PMC5977250; doi:10.3390/v10050257)
Supplement: Supplementary file 1 [file viruses-10-00257-s001.zip › Table S5.xlsx]

## Sheet: JA, ET, SA
Table S5. Genes involved in plant hormone biosynthesis and signaling in which expression was altered by PSTVd infection.
Category	Gene ID	Gene Symbol	NCBI description	KEGG description	Fold Change (M)				Fold Change (S23)
					8 dpi	17 dpi	24 dpi	49 dpi	8 dpi	17 dpi	24 dpi	49 dpi
JASMONIC ACID
Biosynthesis	Solyc01g006540.2.1	TomloxC	lipoxygenase	LOX2S; lipoxygenase [EC:1.13.11.12]		-4.1128	-3.8177					-4.28256
	Solyc08g014000.2.1	LOX1.1	lipoxygenase									2.46516
	Solyc01g099170.2.1	TomloxE	lipoxygenase								5.32525	12.4596
	Solyc04g079730.1.1	aos	allene oxide synthase	AOS; hydroperoxide dehydratase [EC:4.2.1.92]								2.76217
	Solyc07g007870.2.1	opr3	12-oxophytodienoate reductase 3	OPR; 12-oxophytodienoic acid reductase [EC:1.3.1.42]						2.13536	2.04217
	Solyc01g103390.2.1	opr2	opr2 protein	OPR; 12-oxophytodienoic acid reductase [EC:1.3.1.42]							-2.00111
	Solyc12g094520.1.1	LOC101251665	4-coumarate--CoA ligase-like 5-like	OPCL1; OPC-8:0 CoA ligase 1 [EC:6.2.1.-]							2.25636
	Solyc10g085200.1.1	LOC101250354	acyl-coenzyme A oxidase 4, peroxisomal	ACX, E1.3.3.6, ACOX1, ACOX3; acyl-CoA oxidase [EC:1.3.3.6]						-3.03301
	Solyc09g061840.2.1	LOC101262853	3-ketoacyl-CoA thiolase 2, peroxisomal	KAT/ACAA1; acetyl-CoA acyltransferase 1 [EC:2.3.1.16]		2.71474	12.2807	2.6895		15.9968	4.72519	8.7703
	Solyc09g091470.2.1	LOC101255924	3-ketoacyl-CoA thiolase 2, peroxisomal	KAT/ACAA1; acetyl-CoA acyltransferase 1 [EC:2.3.1.16]						2.52438	2.04962	2.34194
Signaling	Solyc10g011660.2.1	LOC101262053	jasmonic acid-amido synthetase JAR1-like	JAR1; jasmonic acid-amino synthetase						2.39229	7.39816	3.7436
	Solyc03g122190.2.1	SRG1	salt responsive protein 1	JAZ; jasmonate ZIM domain-containing protein						-2.20944		2.93681
	Solyc11g011030.1.1	Prg1	Pto-responsive gene 1 protein	JAZ; jasmonate ZIM domain-containing protein			4.09807				5.96767
	Solyc08g076930.1.1	MYC2	transcription factor MYC2	MYC2; transcription factor MYC2							2.8115	2.00364
ETHYLENE
Biosynthesis	Solyc12g099000.1.1	SAM2	S-adenosylmethionine synthase 2-like	metK; S-adenosylmethionine synthetase F						-6.30233	2.4226	2.4921
	Solyc00g095860.1.1	ACS1A	1-aminocyclopropane-1-carboxylate synthase	ACS1_2_6; 1-aminocyclopropane-1-carboxylate synthase 1/2/6 [EC:4.4.1.14]			3.01606					3.17052
	Solyc01g095080.2.1	ACS2	1-aminocyclopropane-1-carboxylate synthase 2	ACS1_2_6; 1-aminocyclopropane-1-carboxylate synthase 1/2/6 [EC:4.4.1.14]						6.84146		15.0726
	Solyc02g091990.2.1	ACS3	ACC synthase	ACS; 1-aminocyclopropane-1-carboxylate synthase [EC:4.4.1.14]							3.0389
	Solyc08g008100.2.1	ACS6	1-aminocyclopropane-1-carboxylate synthase	ACS1_2_6; 1-aminocyclopropane-1-carboxylate synthase 1/2/6 [EC:4.4.1.14]							2.05489	3.62611
	Solyc02g036350.2.1	LOC100125909	1-aminocyclopropane-1-carboxylate oxidase	ACO, E1.14.17.4; aminocyclopropanecarboxylate oxidase [EC:1.14.17.4]						-2.65283
	Solyc02g081190.2.1	ACO4-like	1-aminocyclopropane-1-carboxylate oxidase	ACO, E1.14.17.4; aminocyclopropanecarboxylate oxidase [EC:1.14.17.4]			2.04762
	Solyc07g049530.2.1	ACO1	1-aminocyclopropane-1-carboxylate oxidase 1	ACO, E1.14.17.4; aminocyclopropanecarboxylate oxidase [EC:1.14.17.4]			24.5507			128.058	15.9517	51.2076
	Solyc07g049550.2.1	ACO4	ethylene-forming enzyme	ACO, E1.14.17.4; aminocyclopropanecarboxylate oxidase [EC:1.14.17.4]		2.55137	2.66521			11.9325		2.84276
Signaling	Solyc06g053710.2.1	ETR4	ethylene receptor homolog	ETR, ERS; ethylene receptor [EC:2.7.13.-]		4.33924				17.6185
	Solyc09g089610.2.1	ETR6	ethylene receptor-like protein	ETR, ERS; ethylene receptor [EC:2.7.13.-]								2.94484
	Solyc11g006180.1.1	ETR5	ethylene receptor homolog	ETR, ERS; ethylene receptor [EC:2.7.13.-]		2.87247				3.30053
	Solyc12g011330.2.1	ETR1	ethylene receptor homolog	ETR, ERS; ethylene receptor [EC:2.7.13.-]						2.148
	Solyc09g009090.2.1	CTR3	CTR1-like protein kinase	CTR1; serine/threonine-protein kinase CTR1 [EC:2.7.11.1]						2.47317
	Solyc10g083610.1.1	TCTR1	ethylene-inducible CTR1-like protein kinase	CTR1; serine/threonine-protein kinase CTR1 [EC:2.7.11.1]						2.70747		2.59604
	Solyc01g009170.2.1	EIL2	EIL2 protein	EIN3; ethylene-insensitive protein 3							2.08034
	Solyc06g073720.1.1	EIL1	EIL1 protein	EIN3; ethylene-insensitive protein 3		2.29119
	Solyc06g073730.1.1	EIL4	EIN3-like protein	EIN3; ethylene-insensitive protein 3								2.7993
	---	LOC101267105	ethylene-responsive transcription factor 1B-like	ERF1; ethylene-responsive transcription factor 1	-2.92178		2.96614			7.85728	3.24043
	Solyc05g051200.1.1	ERF1	ethylene-responsive factor 1	ERF1; ethylene-responsive transcription factor 1			2.35859			4.92909	3.04169	2.65139
	Solyc09g089930.1.1	EREB	ethylene responsive element binding protein	ERF1; ethylene-responsive transcription factor 1		11.718	5.48496			23.5083		3.65489
SALICYLIC ACID
Biosynthesis	Solyc09g007920.2.1	LOC101243922	phenylalanine ammonia-lyase-like	PAL; phenylalanine ammonia-lyase [EC:4.3.1.24]						-8.24621
Signaling	Solyc02g069310.2.1	NML1	NIM1-like protein 1	NPR1; regulatory protein NPR1								2.29382
	Solyc07g044980.2.1	NML2	NIM1-like protein 2	NPR1; regulatory protein NPR1		2.1574				2.41076		2.50799
	Solyc04g072460.2.1	LOC101265431	transcription factor TGA1-like	TGA; transcription factor TGA						3.73175	2.76952	4.49477
	Solyc10g080770.1.1	LOC543600	TGACG-sequence-specific DNA-binding protein TGA-2.1	TGA; transcription factor TGA								2.64695
	Solyc01g106600.2.1	LOC101257309	pathogenesis-related leaf protein 4-like	PR1; pathogenesis-related protein 1								2.26386
	Solyc01g106610.2.1	PR-1a1	PR-1a1 protein	PR1; pathogenesis-related protein 1						47.7314		19.399
	Solyc09g007010.1.1	P4	pathogenesis-related protein P4	PR1; pathogenesis-related protein 1		16.4595	209.813			189.865	1457.62	34.408
	Solyc00g174330.2.1	PR1b1	pathogenesis-related leaf protein 6	PR1; pathogenesis-related protein 1			33.4801			17.1094	125.212

## Sheet: GA, ABA, BR, CK, IAA
Category	Gene ID	Gene Symbol	NCBI description	KEGG description	Fold Change (M)				Fold Change (S23)
					8 dpi	17 dpi	24 dpi	49 dpi	8 dpi	17 dpi	24 dpi	49 dpi
ISOPRENOID
MEP pathway	Solyc01g067890.2.1	dxs	1-D-deoxyxylulose 5-phosphate synthase	dxs; 1-deoxy-D-xylulose-5-phosphate synthase [EC:2.2.1.7]						-4.24499		-5.46644
	Solyc01g102820.2.1	LOC101251334	2-C-methyl-D-erythritol 4-phosphate cytidylyltransferase, chloroplastic-like	ispD; 2-C-methyl-D-erythritol 4-phosphate cytidylyltransferase [EC:2.7.7.60]						-3.80526		-4.79355
	Solyc08g081570.2.1	LOC101246365	2-C-methyl-D-erythritol 2,4-cyclodiphosphate synthase, chloroplastic-like	ispF; 2-C-methyl-D-erythritol 2,4-cyclodiphosphate synthase [EC:4.6.1.12]						-3.36269
	Solyc11g069380.1.1	HDS	4-hydroxy-3-methylbut-2-en-1-yl diphosphate synthase	gcpE, ispG; (E)-4-hydroxy-3-methylbut-2-enyl-diphosphate synthase [EC:1.17.7.1 1.17.7.3]						-2.03268
	Solyc04g056390.2.1	IDI1	isopentenyl diphosphate isomerase	idi, IDI; isopentenyl-diphosphate Delta-isomerase [EC:5.3.3.2]						-3.35642		-3.1403
	Solyc05g055760.2.1	IPI	isopentenyl diphosphate isomerase	idi, IDI; isopentenyl-diphosphate Delta-isomerase [EC:5.3.3.2]			-3.45175
MVA pathway	Solyc04g015100.2.1	LOC101256172	probable acetyl-CoA acetyltransferase, cytosolic 2	AACT, E2.3.1.9, atoB; acetyl-CoA C-acetyltransferase [EC:2.3.1.9]							2.17108
	Solyc05g017760.2.1	LOC101260435	acetyl-CoA acetyltransferase, cytosolic 1	AACT, E2.3.1.9, atoB; acetyl-CoA C-acetyltransferase [EC:2.3.1.9]			-2.44225			-2.89968		-2.54013
	Solyc08g076140.2.1	LOC101252616	phosphomevalonate kinase	PMK, E2.7.4.2, mvaK2; phosphomevalonate kinase [EC:2.7.4.2]						2.42518	2.12983	2.82464
	Solyc04g056390.2.1	IDI1	isopentenyl diphosphate isomerase	idi, IDI; isopentenyl-diphosphate Delta-isomerase [EC:5.3.3.2]						-3.35642		-3.1403
	Solyc05g055760.2.1	IPI	isopentenyl diphosphate isomerase	idi, IDI; isopentenyl-diphosphate Delta-isomerase [EC:5.3.3.2]			-3.45175
GIBBERELLIN
Biosynthesis	Solyc03g006880.2.1	20ox-1	gibberellin 20-oxidase-1	GA20ox1/GA5; E1.14.11.12; gibberellin 20-oxidase [EC:1.14.11.12]				-3.22305		-8.32936	24.0141
	Solyc06g035530.2.1	20ox-2	gibberellin 20-oxidase-2	GA20ox2/GA5; E1.14.11.12; gibberellin 20-oxidase [EC:1.14.11.12]							14.3256
	Solyc11g072310.1.1	20ox-3	gibberellin 20-oxidase-3	GA20ox3/GA5; E1.14.11.12; gibberellin 20-oxidase [EC:1.14.11.12]							10.1868
	Solyc06g066820.2.1	3OH-1	gibberellin 3-beta-hydroxylase 1	GA3ox1/GA4; E1.14.11.15; gibberellin 3-beta-dioxygenase [EC:1.14.11.15]							2.68453
	Solyc12g006460.1.1	LOC101261488	ent-kaurenoic acid oxidase 2-like	KAO; ent-kaurenoic acid hydroxylase [EC:1.14.13.79]							7.48889
Signaling	Solyc01g098390.2.1	LOC101253625	gibberellin receptor GID1C	GID1; gibberellin receptor GID1 [EC:3.-.-.-]			6.48748				8.42456	13.0406
	Solyc11g011260.1.1	GAI	GAI-like protein	GAI/DELLA; DELLA protein							-2.45337
	Solyc07g043580.2.1	LOC101252303	transcription factor PIF4	PIF4; phytochrome-interacting factor 4							2.06668
CYTOKININ
Biosynthesis	---	LOC101246295	zeatin O-glucosyltransferase-like	CISZOG; cis-zeatin O-glucosyltransferase [EC:2.4.1.215]						22.6021		10.6448
	---	LOC101263304	zeatin O-glucosyltransferase	CISZOG; cis-zeatin O-glucosyltransferase [EC:2.4.1.215]			-2.17183
	Solyc12g009930.1.1	LOC101265706	zeatin O-glucosyltransferase-like	CISZOG; cis-zeatin O-glucosyltransferase [EC:2.4.1.215]							3.28344	-2.4263
	Solyc10g084150.1.1	LOG6	cytokinin riboside 5'-monophosphate phosphoribohydrolase LOG6							-4.80086		-3.55891
	Solyc11g069570.1.1	LOC101262778	cytokinin riboside 5'-monophosphate phosphoribohydrolase LOG3								2.11493	4.99194
	Solyc08g062820.2.1	LOC101252798	cytokinin riboside 5'-monophosphate phosphoribohydrolase LOG8								-2.78371	2.79381
Signaling	Solyc01g098400.2.1	LOC101253938	histidine-containing phosphotransfer protein 1	AHP; histidine-containing phosphotransfer peotein							4.18658
	Solyc06g084410.2.1	LOC101249559	histidine-containing phosphotransfer protein 1	AHP; histidine-containing phosphotransfer peotein						2.24316		2.71869
	Solyc02g071220.2.1	LOC101265701	two-component response regulator ORR3-like	ARR-A; two-component response regulator ARR-A family						-3.13537		2.67904
	Solyc03g113720.2.1	LOC101260711	two-component response regulator ARR15	ARR-A; two-component response regulator ARR-A family				2.21044
	Solyc05g006420.2.1	LOC101244285	two-component response regulator ARR5	ARR-A; two-component response regulator ARR-A family		-3.3195	2.41792			-2.46884	2.68812	5.97636
	Solyc10g079600.1.1	LOC101247174	two-component response regulator ARR9	ARR-A; two-component response regulator ARR-A family						-3.46852		2.73123
ABSCISIC ACID
Biosynthesis	Solyc02g081330.2.1	PSY2	phytoene synthase 2, chloroplastic	crtB; 15-cis-phytoene/all-trans-phytoene synthase [EC:2.5.1.32 2.5.1.99]							-3.35692	-5.47449
	Solyc03g031860.2.1	Psy1	phytoene synthase 1, chloroplastic	crtB; 15-cis-phytoene/all-trans-phytoene synthase [EC:2.5.1.32 2.5.1.99]			3.20038			5.33676	-3.26531	2.06375
	Solyc01g097810.2.1	zds	zeta-carotene desaturase	ZDS, crtQ; zeta-carotene desaturase [EC:1.3.5.6]						-2.22989		-2.16763
	Solyc02g090890.2.1	ZEP	zeaxanthin epoxidase, chloroplastic	ZEP, ABA1; zeaxanthin epoxidase [EC:1.14.15.21]						-4.72531		-2.31758
	Solyc04g050930.2.1	VDE	violaxanthin de-epoxidase	VDE, NPQ1; violaxanthin de-epoxidase [EC:1.23.5.1]						-4.39549	-6.02947	-5.15684
	Solyc06g074240.1.1	NSY	lycopene beta-cyclase, chromoplastic	NSY; neoxanthin synthase [EC:5.3.99.9]			3.17951	2.87302				4.13798
	Solyc07g056570.1.1	LeNCED1	nine-cis-epoxycarotenoid dioxygenase	NCED; 9-cis-epoxycarotenoid dioxygenase [EC:1.13.11.51]								-2.98263
	Solyc04g071940.2.1	LOC101254297	xanthoxin dehydrogenase-like	ABA2; xanthoxin dehydrogenase [EC:1.1.1.288]						-4.0291		-5.72529
	Solyc11g071620.1.1	AO1	aldehyde oxidase	AAO3; abscisic-aldehyde oxidase [EC:1.2.3.14]								-2.00489
	Solyc08g005610.2.1	LOC101249565	abscisic acid 8'-hydroxylase 1	E1.14.13.93; (+)-abscisic acid 8'-hydroxylase [EC:1.14.13.93]							-2.74604
Transport	Solyc08g006880.2.1	LOC101253706	ABC transporter C family member 2-like							2.30254		2.15373
	Solyc09g075020.2.1	LOC101249208	ABC transporter C family member 4-like				3.53463			6.21356	8.10715	8.31839
Signaling	Solyc04g078840.2.1	AREB	AREB-like protein	ABF; ABA responsive element binding factor	-3.35431				-2.85774
	Solyc11g044560.1.1	SlABF4	ABA responsive transcription factor	ABF; ABA responsive element binding factor							2.21889
	Solyc03g007310.2.1	LOC101251256	abscisic acid receptor PYL8	PYL; abscisic acid receptor PYR/PYL family						-5.15511		-3.65942
	Solyc03g095780.1.1	LOC101256856	abscisic acid receptor PYL4	PYL; abscisic acid receptor PYR/PYL family						2.74485
	Solyc03g006960.2.1	LOC101268450	probable protein phosphatase 2C 75	PP2C; protein phosphatase 2C [EC:3.1.3.16]						3.03509		3.61551
	Solyc03g121880.2.1	PP2C-1	protein phosphatase 2C ABI2 homolog	PP2C; protein phosphatase 2C [EC:3.1.3.16]						-4.13864
	Solyc05g052980.2.1	LOC101248778	protein phosphatase 2C 37	PP2C; protein phosphatase 2C [EC:3.1.3.16]						-12.0864
	Solyc06g076400.2.1	LOC101244003	probable protein phosphatase 2C 24	PP2C; protein phosphatase 2C [EC:3.1.3.16]			-3.38276			-13.7586		-5.47833
	Solyc04g074500.2.1	LOC101262107	serine/threonine-protein kinase SAPK2	SNRK2; serine/threonine-protein kinase SRK2 [EC:2.7.11.1]						2.37274	2.05856	2.56575
	Solyc03g116890.2.1	LOC101246812	probable WRKY transcription factor 40				15.8666	5.56769		32.6606	9.87866	20.6041
	Solyc04g015750.2.1	LOC101244176	magnesium-chelatase subunit ChlH, chloroplastic				-2.83945	-5.16749		-8.79682		-8.26195
	Solyc08g061220.2.1	GPA1	G protein alpha subunit							2.11055		2.74081
	Solyc10g079860.1.1	Q`b	glucan endo-1,3-beta-D-glucosidase							4.7666	5.13962	3.20883
	Solyc02g063170.2.1	LOC101257039	protein ABA DEFICIENT 4, chloroplastic-like									-2.66028
BRASSINOSTEROID
Biosynthesis	Solyc01g110290.2.1	LOC100316899	squalene synthase	FDFT1; farnesyl-diphosphate farnesyltransferase [EC:2.5.1.21]								-3.38162
	Solyc04g077440.2.1	LOC101250012	squalene monooxygenase	SQLE, ERG1; squalene monooxygenase [EC:1.14.14.17]						-2.30262	2.80639
	Solyc01g087560.2.1	LOC101252433	cycloartenol-C-24-methyltransferase 1	SMT1, ERG6; E2.1.1.41, sterol 24-C-methyltransferase [EC:2.1.1.41]							-3.38895
	Solyc01g091320.2.1	LOC104649012	methylsterol monooxygenase 1-1-like	SMO1; 4,4-dimethyl-9beta,19-cyclopropylsterol-4alpha-methyl oxidase [EC:1.14.13.72]							14.756	-11.1694
	Solyc12g098640.1.1	CYC1	cyclopropyl isomerase	CPI1; cycloeucalenol cycloisomerase [EC:5.5.1.9]						-4.54628
	Solyc09g009040.2.1	FK	delta14-sterol reductase	TM7SF2, ERG24; Delta14-sterol reductase [EC:1.3.1.70]								-5.03029
	Solyc06g082980.2.1	LOC101259646	probable 3-beta-hydroxysteroid-Delta(8),Delta(7)-isomerase	EBP; cholestenol Delta-isomerase [EC:5.3.3.5]						-4.46005		-2.02228
	Solyc06g005750.2.1	LOC101258266	methylsterol monooxygenase 2-2	SMO2; 4-alpha-methyl-delta7-sterol-4alpha-methyl oxidase [EC:1.14.13.72]			-2.55252				13.7832	-7.16253
	Solyc06g076410.2.1	LOC100736533	C-4 methyl sterol oxidase	SMO2; 4-alpha-methyl-delta7-sterol-4alpha-methyl oxidase [EC:1.14.13.72]						-2.45687
	Solyc01g009310.2.1	LOC101248602	7-dehydrocholesterol reductase	DWF5, DHCR7; 7-dehydrocholesterol reductase [EC:1.3.1.21]						2.30394
	Solyc02g069490.2.1	LOC101244831	delta(24)-sterol reductase-like	DWF1, DHCR24; Delta24-sterol reductase [EC:1.3.1.72 1.3.1.-]							9.38064	-7.37048
	Solyc07g056160.2.1	CYP724B2	cytochrome P450 724B1-like	CYP724B1, D11; cytochrome P450 family 724 subfamily B polypeptide 1 [EC:1.14.13.-]						-2.27593	-2.89183
	Solyc06g051750.2.1	LOC101255105	cytochrome P450 90A1	CYP90A1, CPD; cytochrome P450 family 90 subfamily A polypeptide 1 [EC:1.14.-.-]							-3.46706
	Solyc03g122350.2.1	LOC101252373	cytochrome P450 71A1-like	CYP92A6; typhasterol/6-deoxotyphasterol 2alpha-hydroxylase			43.4784	6.8887		133.962	30.2842	21.0535
	Solyc02g089160.2.1	CYP85A1	6-deoxocastasterone oxidase	CYP85A1, BR6OX1; brassinosteroid-6-oxidase 1 [EC:1.14.-.-]			4.81058				6.26178
	Solyc05g011970.2.1	LOC101260816	cytochrome P450 CYP749A22-like	CYP734A1, BAS1; PHYB activation tagged suppressor 1 [EC:1.14.-.-]							2.5038	2.88282
Signaling	Solyc02g072300.2.1	LOC101249039	shaggy-related protein kinase eta-like	BIN2; protein brassinosteroid insensitive 2 [EC:2.7.11.1]						-2.13053
	Solyc12g062870.1.1	LOC101266803	shaggy-related protein kinase epsilon-like			2.01893					2.03807
	Solyc02g086670.2.1	LOC101254442	shaggy-related protein kinase epsilon		-3.10007				-2.27478		2.3987
	Solyc11g064890.1.1	LOC543567	hypoxia-induced protein L31	BSK; BR-signaling kinase [EC:2.7.11.1]						-3.31655
	Solyc01g107730.2.1	cycd3c2	D-type cyclin-2	CYCD3; cyclin D3, plant			-6.50454			-6.80653	-18.4683	-4.82525
	Solyc02g092980.2.1	cycD3	cyclin D3.1	CYCD3; cyclin D3, plant							-2.0204
	Solyc04g078470.2.1	cycd3c3	D-type cyclin-3	CYCD3; cyclin D3, plant			-4.32668			-5.39238	-2.65898
	Solyc01g073650.2.1	LOC101245881	serine/threonine-protein phosphatase PP2A-5 catalytic subunit	PP2A						-2.39495
	Solyc01g034020.2.1	LOC101257003	serine/threonine-protein phosphatase PP2A catalytic subunit	PP2A						-3.72717		-3.08156
	Solyc01g067400.2.1	LOC101245581	serine/threonine-protein kinase CDL1	CDL1						2.44551
	Solyc11g072660.1.1	LOC101254270	serine/threonine-protein kinase CDL1-like	CDL1						3.08755	3.30917	2.99045
	Solyc05g024290.2.1	LOC101256183	serine/threonine-protein kinase PBS1	CDL1								2.08617
AUXIN
Biosynthesis	Solyc06g071550.2.1	LOC101257271	anthranilate phosphoribosyltransferase, chloroplastic	trpD; anthranilate phosphoribosyltransferas						2.36664
	Solyc03g111850.2.1	LOC101250390	indole-3-glycerol phosphate synthase, chloroplastic	trpC; indole-3-glycerol phosphate synthase						-4.10999		-3.41267
	Solyc01g098550.2.1	LOC101255433	tryptophan synthase alpha chain-like	trpA; tryptophan synthase alpha chain								-3.20818
	Solyc12g096190.1.1	LOC101261400	tryptophan synthase beta chain 2	trpB; tryptophan synthase beta chain							2.68817	2.85907
Signaling	Solyc09g014380.2.1	SlLAX1	protein LAX1	AUX1, LAX; auxin influx carrier (AUX1 LAX family)						-2.90344	-2.44562
	Solyc01g097290.2.1	SlIAA16	auxin responsive protein IAA16	IAA; auxin-responsive protein IAA								-2.10464
	Solyc03g120380.2.1	LOC101055549	IAA19	IAA; auxin-responsive protein IAA								-3.22596
	Solyc03g120390.2.1	IAA8	protein IAA8	IAA; auxin-responsive protein IAA	-2.46751
	Solyc03g121060.2.1	LOC101055552	IAA26	IAA; auxin-responsive protein IAA								4.9832
	Solyc06g008590.2.1	IAA10	IAA10 protein	IAA; auxin-responsive protein IAA								-2.08144
	Solyc06g053830.2.1	IAA7	IAA7 protein	IAA; auxin-responsive protein IAA						-10.1564		-4.76387
	Solyc06g053840.2.1	IAA4	auxin-responsive protein IAA4-like	IAA; auxin-responsive protein IAA			-2.52541			-6.14511		-2.65162
	Solyc08g021820.2.1	LOC101055553	IAA29	IAA; auxin-responsive protein IAA				-2.9399			-5.49304
	Solyc09g083290.2.1	LOC101055547	IAA14	IAA; auxin-responsive protein IAA						-2.78342
	Solyc12g007230.1.1	SlIAA8	auxin-regulated IAA8	IAA; auxin-responsive protein IAA						-2.43478
	Solyc02g064830.2.1	LOC101268544	probable indole-3-acetic acid-amido synthetase GH3.1	GH3; auxin responsive GH3 gene family						3.69797
	Solyc01g110680.2.1	LOC107026807	auxin-responsive protein SAUR21-like	SAUR; SAUR family protein		-2.42712				-2.34676	3.26685
	Solyc02g084010.1.1	LOC101256828	auxin-induced protein 15A-like	SAUR; SAUR family protein		2.00354	5.86683	2.59116		2.23826
	Solyc05g056430.1.1	---	Small auxin up-regulated RNA56 SlSAUR56	SAUR; SAUR family protein	-2.53726
	Solyc06g072650.1.1	LOC101265243	auxin-responsive protein SAUR71	SAUR; SAUR family protein								8.25276
	Solyc03g117360.2.1	LOC101252765	protein TOPLESS-like							-5.17031		-3.8924
	Solyc11g042930.1.1	LOC101243954	SKP1-like protein 1A							2.32315		2.67368
	Solyc08g082630.2.1	ARF9	auxin response factor 9				-3.60045				-5.15985	-3.82572
	Solyc02g077560.2.1	ARF3	auxin response factor 3			-14.328	-9.4868
