# Supplementary material for: Time-Course Microarray Analysis Reveals Differences between Transcriptional Changes in Tomato Leaves Triggered by Mild and Severe Variants of Potato Spindle Tuber Viroid
Source: Viruses. 2018 May 15;10(5):257. doi: 10.3390/v10050257 (PMC5977250; doi:10.3390/v10050257)
Supplement: Supplementary file 1 [file viruses-10-00257-s001.zip › Table S6.xlsx]

## Sheet: Photosynthesis and chloroplast
Table S6. Photosynthesis- and chloroplast-related genes in which expression was altered by PSTVd infection. The fold change (FC) value at each time point is indicated.
Gene ID	NCBI description	KEGG description	Fold Change (M)				Fold Change (S23)
			8 dpi	17 dpi	24 dpi	49 dpi	8 dpi	17 dpi	24 dpi	49 dpi
PHOTOSYNTHESIS
Solyc02g065400.2.1	33kDa precursor protein of oxygen-evolving complex	psbO; photosystem II oxygen-evolving enhancer protein 1								-2.46114
Solyc05g050500.1.1	ATP synthase delta chain, chloroplastic-like	ATPF1D, atpH; F-type H+-transporting ATPase subunit delta						-3.09239	-3.75744	-3.49208
Solyc12g056830.1.1	ATP synthase delta chain, chloroplastic-like	ATPF1D, atpH; F-type H+-transporting ATPase subunit delta								-2.68325
Solyc02g080540.1.1	ATP synthase gamma chain, chloroplastic-like	ATPF1G, atpG; F-type H+-transporting ATPase subunit gamma							-2.07238	-3.073
Solyc12g005060.1.1	ATP synthase gamma chain, chloroplastic-like	ATPF1G, atpG; F-type H+-transporting ATPase subunit gamma						2.8858		2.15834
Solyc06g066000.1.1	ATP synthase subunit b', chloroplastic-like	ATPF0B, atpF; F-type H+-transporting ATPase subunit b							-2.06147	-2.02626
Solyc01g007320.2.1	ATP synthase subunit beta, chloroplastic-like	ATPF1B, atpD; F-type H+-transporting ATPase subunit beta [EC:3.6.3.14]				-3.87542		-3.3709		-6.40194
Solyc00g019740.1.1	ATPase subunit 8	ATPF0B, atpF; F-type H+-transporting ATPase subunit b						-3.69256
Solyc01g007410.2.1	Cytochrome b559 subunit alpha	psbF; photosystem II cytochrome b559 subunit beta							-2.83556	-4.74982
Solyc01g007530.2.1	Cytochrome b6	petB; cytochrome b6				-2.30382				-4.21389
Solyc12g005630.1.1	cytochrome b6-f complex iron-sulfur subunit, chloroplastic-like	petC; cytochrome b6-f complex iron-sulfur subunit [EC:1.10.9.1]								-2.16003
Solyc01g007430.2.1	Cytochrome b6-f complex subunit 5	petG; cytochrome b6-f complex subunit 5								-2.00752
Solyc01g007380.1.1	cytochrome f	petA; apocytochrome f				-2.13603				-2.11907
Solyc10g075160.1.1	ferredoxin-1, chloroplastic-like	petF; ferredoxin								-3.13518
Solyc08g077050.2.1	ferredoxin-2-like	petF; ferredoxin							-2.06181	-3.55759
Solyc03g005190.2.1	ferredoxin-3, chloroplastic-like	petF; ferredoxin							-2.69398	-3.27321
Solyc11g068430.1.1	ferredoxin-3, chloroplastic-like	petF; ferredoxin							-2.25523
Solyc02g083810.2.1	ferredoxin--NADP reductase, leaf-type isozyme, chloroplastic-like	petH; ferredoxin--NADP+ reductase [EC:1.18.1.2]								-2.14774
Solyc02g090030.2.1	oxygen-evolving enhancer protein 1, chloroplastic-like	psbO; photosystem II oxygen-evolving enhancer protein 1								-3.03658
Solyc09g015320.1.1	Photosystem I assembly protein Ycf3	psaA; photosystem I P700 chlorophyll a apoprotein A1				-2.01523		-2.27161	-2.11898	-3.13152
Solyc02g069460.2.1	photosystem I reaction center subunit III, chloroplastic-like	psaF; photosystem I subunit III								-6.17254
Solyc08g013670.2.1	photosystem I reaction center subunit N, chloroplastic-like	psaN; photosystem I subunit PsaN						-2.0387		-6.119
Solyc07g066150.1.1	photosystem I reaction center subunit V, chloroplastic-like	psaG; photosystem I subunit V								-4.16756
Solyc03g120640.2.1	photosystem I reaction center subunit VI, chloroplastic-like	psaH; photosystem I subunit VI						-2.5531		-4.54608
Solyc06g082940.2.1	photosystem I reaction center subunit XI, chloroplastic-like	psaL; photosystem I subunit XI								-2.1967
Solyc06g054260.1.1	photosystem I subunit II protein precursor	psaD; photosystem I subunit II								-3.04999
Solyc06g074200.2.1	photosystem I subunit O	psaO; photosystem I subunit PsaO						-3.16917		-7.84423
Solyc06g060340.2.1	photosystem II 22 kDa protein, chloroplastic-like	psbS; photosystem II 22kDa protein							-2.95725	-3.17806
Solyc07g044860.2.1	photosystem II 23 kDa protein	psbP; photosystem II oxygen-evolving enhancer protein 2								-3.38174
Solyc01g011480.1.1	Photosystem II CP43 chlorophyll apoprotein	psbC; photosystem II CP43 chlorophyll apoprotein						-3.12194		-3.72764
Solyc02g079950.2.1	photosystem II oxygen-evolving complex protein 3	psbQ; photosystem II oxygen-evolving enhancer protein 3								-4.23863
Solyc01g007520.2.1	Photosystem II reaction center protein H	psbH; photosystem II PsbH protein				-3.43438		-2.38187	-3.24371	-4.9645
Solyc06g084050.2.1	photosystem II reaction center W protein, chloroplastic-like	psbW; photosystem II PsbW protein						-2.16027	-2.88024	-11.2719
Solyc09g065910.1.1	photosystem II reaction center W protein, chloroplastic-like	psbW; photosystem II PsbW protein								-2.76409
Solyc04g082010.1.1	pre-plastocyanin (AA -64 to 106)	petE; plastocyanin								-3.82279
Solyc03g114930.2.1	psbP-like protein 1, chloroplastic-like	psbP; photosystem II oxygen-evolving enhancer protein 2							-4.42787	-7.31121
Solyc10g054420.1.1	psbP-like protein 2, chloroplastic-like	psbP; photosystem II oxygen-evolving enhancer protein 2						-4.09912	-2.08338	-2.49082
PHOTOSYNTHESIS-ANTENNA PROTEINS
Solyc05g056050.2.1	chlorophyll a/b binding protein precursor	LHCA1; light-harvesting complex I chlorophyll a/b binding protein 1						-3.16603		-5.01448
Solyc10g007690.2.1	chlorophyll a-b binding protein 8, chloroplastic-like	LHCA3; light-harvesting complex I chlorophyll a/b binding protein 3			-2.236			-2.96858		-3.69929
Solyc12g011280.1.1	chlorophyll a-b binding protein 8, chloroplastic-like	LHCA3; light-harvesting complex I chlorophyll a/b binding protein 3						-3.09267		-9.69078
Solyc03g115900.2.1	chlorophyll a-b binding protein P4, chloroplastic-like	LHCA4; light-harvesting complex I chlorophyll a/b binding protein 4			-2.59433			-3.61721		-4.886
Solyc07g022900.2.1	chlorophyll a-b binding protein 7, chloroplastic-like	LHCA5; light-harvesting complex I chlorophyll a/b binding protein 5						-2.06685	-2.67175	-5.35462
Solyc02g070940.1.1	chlorophyll a-b binding protein 1B, chloroplastic-like	LHCB1; light-harvesting complex II chlorophyll a/b binding protein 1			-2.04184					-2.47392
Solyc02g071010.1.1	chlorophyll a/b-binding protein Cab-1B	LHCB1; light-harvesting complex II chlorophyll a/b binding protein 1			-2.65965			-4.14241		-8.26458
Solyc03g005760.1.1	chlorophyll a-b binding protein 3C, chloroplastic-like	LHCB1; light-harvesting complex II chlorophyll a/b binding protein 1								-2.26691
Solyc07g047850.2.1	chlorophyll a/b-binding protein precursor	LHCB2; light-harvesting complex II chlorophyll a/b binding protein 2			-2.63198			-2.62639		-4.79819
Solyc12g006140.1.1	chlorophyll a/b-binding protein precursor	LHCB2; light-harvesting complex II chlorophyll a/b binding protein 2			-12.1386	-3.65109		-16.9316	-2.79078	-32.6868
Solyc07g063600.2.1	chlorophyll a-b binding protein 13, chloroplastic-like	LHCB3; light-harvesting complex II chlorophyll a/b binding protein 3			-3.58315			-3.97642	-2.14327	-6.83573
Solyc12g011450.1.1	chlorophyll a-b binding protein 13, chloroplastic-like	LHCB3; light-harvesting complex II chlorophyll a/b binding protein 3			-2.8272			-4.75471		-4.99255
Solyc09g014520.2.1	chlorophyll a-b binding protein CP29.2, chloroplastic-like	LHCB4; light-harvesting complex II chlorophyll a/b binding protein 4								-4.82024
Solyc06g063370.2.1	chlorophyll a-b binding protein CP26, chloroplastic-like	LHCB5; light-harvesting complex II chlorophyll a/b binding protein 5								-2.51665
Solyc01g105050.2.1	chlorophyll a-b binding protein CP24 10B, chloroplastic-like	LHCB6; light-harvesting complex II chlorophyll a/b binding protein 6		-2.13826	-2.10132			-2.87545		-7.98724
Solyc04g082930.1.1	chlorophyll a-b binding protein of LHCII type I, chloroplastic-like	LHCB7; light-harvesting complex II chlorophyll a/b binding protein 7						-3.78519
CALVIN-BENSON CYCLE
Solyc05g008370.1.1	probable ribose-5-phosphate isomerase-like	rpiA						-3.21756
Solyc01g097460.2.1	probable ribose-5-phosphate isomerase-like	rpiA							-2.94082	-2.30157
Solyc01g007330.2.1	ribulose bisphosphate carboxylase large chain-like	rbcL				-2.85032				-6.49699
Solyc07g066610.2.1	phosphoglycerate kinase, chloroplastic-like	PGK, pgk						-6.71918		-8.16382
Solyc04g009030.2.1	glyceraldehyde-3-phosphate dehydrogenase A, chloroplastic-like	GAPA								-3.62233
Solyc02g020940.2.1	glyceraldehyde-3-phosphate dehydrogenase A, chloroplastic-like	GAPA						-3.3235	-6.40604	-4.56387
Solyc12g094640.1.1	glyceraldehyde-3-phosphate dehydrogenase B, chloroplastic-like	GAPA				-9.74099		-4.17803	-12.8702	-12.1976
Solyc01g110360.2.1	probable fructose-bisphosphate aldolase 2, chloroplastic-like	ALDO				-2.66014			-2.76309	-2.98675
Solyc02g062340.2.1	probable fructose-bisphosphate aldolase 2, chloroplastic-like	ALDO							-2.86612	-3.52149
Solyc05g008600.2.1	probable fructose-bisphosphate aldolase 3, chloroplastic-like	ALDO						2.75332	2.42618	2.32341
Solyc09g009260.2.1	fructose-1,6-bisphosphate aldolase	ALDO						2.53186		2.51551
Solyc01g106010.2.1	fructose-1,6-bisphosphatase, chloroplastic-like	FBP, fbp						-5.42787		-3.27466
Solyc04g071340.2.1	fructose-1,6-bisphosphatase, cytosolic-like	FBP, fbp				-4.1408		-4.76125	-4.4993	-22.0239
Solyc09g011810.2.1	fructose-1,6-bisphosphatase, chloroplastic-like	FBP, fbp								-3.20211
CHLOROPHYLL METABOLISM
Solyc04g076870.2.1	glutamyl-tRNA reductase 1, chloroplastic-like	hemA; glutamyl-tRNA reductase				-4.95886		-6.0397		-12.5217
Solyc04g009200.2.1	glutamate 1-semialdehyde 2,1-aminomutase	hemL; glutamate-1-semialdehyde 2,1-aminomutase							-2.39784	-4.07593
Solyc08g069030.2.1	delta-aminolevulinic acid dehydratase, chloroplastic-like	hemB, ALAD; porphobilinogen synthase						-2.19375		-2.59559
Solyc07g066470.2.1	porphobilinogen deaminase, chloroplastic-like	hemC, HMBS; hydroxymethylbilane synthase						-17.1993		-20.5711
Solyc04g079320.2.1	uroporphyrinogen-III synthase, chloroplastic-like	hemD, UROS; uroporphyrinogen-III synthase						-8.41336		-4.58246
Solyc10g007320.2.1	uroporphyrinogen decarboxylase 1, chloroplastic	hemE, UROD; uroporphyrinogen decarboxylase						-8.2651		-9.39337
Solyc10g005110.2.1	coproporphyrinogen-III oxidase, chloroplastic-like	CPOX, hemF; coproporphyrinogen III oxidase						-2.73065	-2.15877	-3.8875
Solyc04g015750.2.1	magnesium-chelatase subunit ChlH, chloroplastic-like	chlH, bchH; magnesium chelatase subunit H			-2.83945	-5.16749		-8.79682		-8.26195
Solyc10g008740.2.1	magnesium-chelatase subunit ChlI, chloroplastic-like	chlI, bchI; magnesium chelatase subunit I								-3.85301
Solyc10g077040.1.1	magnesium-protoporphyrin IX monomethyl ester [oxidative] cyclase, chloroplastic-like	E1.14.13.81, acsF, chlE; magnesium-protoporphyrin IX monomethyl ester (oxidative) cyclase			-2.00967			-3.06309		-3.24027
Solyc01g067290.2.1	divinyl chlorophyllide a 8-vinyl-reductase, chloroplastic	DVR; divinyl chlorophyllide a 8-vinyl-reductase							-2.94702	-6.31167
Solyc10g006900.2.1	protochlorophyllide reductase A, chloroplastic-like	por; protochlorophyllide reductase			-5.70835			-6.52714	-4.05583	-22.8215
Solyc12g013710.1.1	protochlorophyllide reductase, chloroplastic-like	por; protochlorophyllide reductase			-8.23093			-10.9084	-6.48342	-40.4266
Solyc07g054210.2.1	light dependent NADH:protochlorophyllide oxidoreductase 2	por; protochlorophyllide reductase						-2.41389		-3.71861
Solyc07g024000.2.1	probable chlorophyll(ide) b reductase NYC1, chloroplastic-like	NOL, NYC1; chlorophyll(ide) b reductase							-7.07914	-2.06393
Solyc05g032660.2.1	chlorophyll(ide) b reductase NOL, chloroplastic-like	NOL, NYC1; chlorophyll(ide) b reductase						-3.39364		-5.24633
Solyc09g014760.2.1	chlorophyll synthase, chloroplastic-like	chlG, bchG; chlorophyll/bacteriochlorophyll a synthase						-4.74393		-5.35138
Solyc06g053980.2.1	chlorophyllase-2, chloroplastic-like	E3.1.1.14; chlorophyllase							-2.62388
Solyc09g091100.2.1	coenzyme F420 hydrogenase_dehydrogenase beta subunit-like	HCAR; 7-hydroxymethyl chlorophyll a reductase					-2.05527
Solyc04g063240.2.1	protein STAY-GREEN LIKE, chloroplastic	SGR, SGRL; magnesium dechelatase						-3.31484	-2.23603	-4.4049
Solyc11g066440.1.1	lethal leaf spot 1-like protein	PAO, ACD1; pheophorbide a oxygenase							2.14844
Solyc03g044470.2.1	red chlorophyll catabolite reductase	RCCR, ACD2; red chlorophyll catabolite reductase						-2.90571		-3.27557
CHLOROPLAST RIBOSOMAL PROTEIN
Solyc05g009570.2.1	30S ribosomal protein 3-1, chloroplastic-like							-3.28859	-4.4354	-7.91473
Solyc01g057830.2.1	30S ribosomal protein S1, chloroplastic-like									-3.11996
Solyc12g077650.1.1	30S ribosomal protein S12 chloroplastic							-2.24981	-2.06214	-2.50459
Solyc07g062870.2.1	30S ribosomal protein S20, chloroplastic-like									-2.21701
Solyc02g077990.2.1	30S ribosomal protein S5, chloroplastic-like							-5.90651	-2.14087	-3.31611
Solyc08g082690.2.1	30S ribosomal protein S6 alpha, chloroplastic-like							-3.25257	-2.91444	-5.88326
Solyc10g081100.1.1	50S ribosomal protein 5, chloroplastic-like								-2.56513	-4.3162
Solyc04g077130.1.1	50S ribosomal protein 6, chloroplastic-like								-2.74981	-5.69869
Solyc02g086740.1.1	50S ribosomal protein L12, chloroplastic-like /// 50S ribosomal protein L12, chloroplas							-2.67985	-3.1954	-6.70252
Solyc05g009370.2.1	50S ribosomal protein L15, chloroplastic-like							-2.59714	-2.7867	-6.45044
Solyc06g082750.2.1	50S ribosomal protein L17, chloroplastic-like								-2.54859	-4.40277
Solyc12g098890.1.1	50S ribosomal protein L18, chloroplastic-like							-2.1079	-3.06851	-5.37495
Solyc01g007630.2.1	50S ribosomal protein L2 chloroplastic							-3.24176		-3.65402
Solyc06g065390.2.1	50S ribosomal protein L21, chloroplastic-like							-3.76334	-2.06117	-3.13364
Solyc07g063960.2.1	50S ribosomal protein L24, chloroplastic-like								-2.36642	-3.96228
Solyc11g068820.1.1	50S ribosomal protein L27, chloroplastic-like							-2.31873	-2.70126	-4.98993
Solyc09g090410.2.1	50S ribosomal protein L28, chloroplastic-like								-2.68901	-3.83422
Solyc06g051200.2.1	50S ribosomal protein L3, chloroplastic-like							-2.61215	-2.30349	-4.30992
Solyc07g061900.2.1	50S ribosomal protein L4, chloroplastic-like								-2.09868	-2.24083
Solyc09g007560.2.1	50S ribosomal protein L5, chloroplastic-like							-4.96921		-6.85621
