# Supplementary material for: Time-Course Microarray Analysis Reveals Differences between Transcriptional Changes in Tomato Leaves Triggered by Mild and Severe Variants of Potato Spindle Tuber Viroid
Source: Viruses. 2018 May 15;10(5):257. doi: 10.3390/v10050257 (PMC5977250; doi:10.3390/v10050257)
Supplement: Supplementary file 1 [file viruses-10-00257-s001.zip › Table S7.xlsx]

## Sheet: Cell wall
Table S7. Differentially regulated cell-wall related genes during PSTVd infection.
		The fold change (FC) value at each time point is indicated
Gene ID	NCBI description	PSTVd-M				PSTVd-S23
		8 dpi	17 dpi	24 dpi	49 dpi	8 dpi	17 dpi	24 dpi	49 dpi
Solyc07g005840.2.1	cellulose synthase A catalytic subunit 7 [UDP-forming]-like							-4.64908
Solyc07g043390.2.1	cellulose synthase-like protein G2			-2.88361			-4.09791		-6.09643
Solyc01g006350.2.1	callose synthase 9-like								-2.77352
Solyc04g082140.2.1	multicopper oxidase-like protein							-2.58725
Solyc03g123620.2.1	pectinesterase 3-like							-7.92435	-4.19653
Solyc02g080210.2.1	pectinesterase-like						-7.25634		-47.7602
Solyc08g078640.1.1	probable pectinesterase 68-like			-4.92592			-4.68867	-21.4132	-5.58855
Solyc06g051960.2.1	probable pectinesterase/pectinesterase inhibitor 34						2.25331
Solyc02g080200.2.1	pectinesterase-like								-18.231
Solyc03g123630.2.1	pectin methylesterase	2.26803
Solyc03g019890.2.1	beta-galactosidase						-5.39467	-6.16278	-10.391
Solyc03g121540.2.1	beta-galactosidase	-2.70456		2.2512		-2.08812	2.38382
Solyc03g116500.2.1	polygalacturonase				2.24861		3.32908
Solyc08g082170.2.1	probable polygalacturonase-like						-6.88286		-5.8596
Solyc09g075460.2.1	probable polygalacturonase-like						-3.36843
Solyc05g005560.2.1	polygalacturonase isoenzyme 1 beta subunit								-2.58016
Solyc07g065090.1.1	polygalacturonase inhibitor-like							-2.37948	-2.56935
Solyc02g068400.2.1	polygalacturonase QRT3				5.54051
Solyc05g049980.2.1	probable polygalacturonase-like			-3.56602
Solyc09g075360.2.1	endo-1,4-beta-glucanase precursor						-4.4383	-7.95116	-6.71321
Solyc09g010210.2.1	endo-1,4-beta-glucanase precursor							-5.93593	-3.27879
Solyc08g081620.2.1	endo-1,4-beta-glucanase precursor				-23.0187			-3.72842	-18.6727
Solyc08g083210.2.1	endo-1,4-beta-glucanase							-6.18968	-9.53671
Solyc12g055970.1.1	endoglucanase 1							-8.79613	-7.75759
Solyc07g049300.2.1	endoglucanase 11-like						-3.1316
Solyc04g081300.2.1	endoglucanase 24-like			-2.43522			-2.51256	-2.51082
Solyc11g008820.1.1	endoglucanase 12-like						2.72715
Solyc01g080220.2.1	endo-1,3;1,4-beta-D-glucanase-like						2.96669	3.63239	5.29405
Solyc09g091430.2.1	probable pectate lyase 15-like						-2.47524	-7.36737	-4.02972
Solyc05g014000.2.1	probable pectate lyase 5-like						-4.20333	-5.0663	-8.10986
Solyc06g083580.2.1	probable pectate lyase 15-like						-5.73277	-4.5514	-3.92683
Solyc04g010230.2.1	probable pectate lyase 4-like								2.04739
Solyc02g093580.2.1	probable pectate lyase P18								7.83802
Solyc03g031800.2.1	probable xyloglucan endotransglucosylase/hydrolase protein 8-like						-2.3358
Solyc04g008210.1.1	probable xyloglucan endotransglucosylase/hydrolase protein 27				-3.79136			3.72334	2.88402
Solyc07g009380.2.1	xyloglucan endotransglycosylase LeXET2	2.45997				2.02227			2.47997
Solyc11g065600.1.1	xyloglucan endotransglycosylase		-5.30238	-5.29368				-3.55416	-3.03102
Solyc07g052980.2.1	xyloglucan endotransglycosylase/hydrolase 16 protein	2.63998		-2.80023		2.02582	-5.51204	-2.87517	-3.9501
Solyc03g093130.2.1	xyloglucan endotransglucosylase-hydrolase XTH3								4.02509
Solyc01g081060.2.1	xyloglucan endotransglucosylase-hydrolase XTH5							2.76099	3.74302
Solyc11g066270.1.1	xyloglucan endotransglucosylase-hydrolase XTH6						5.90198
Solyc02g091920.2.1	xyloglucan endotransglucosylase-hydrolase XTH7						-3.29486
Solyc01g099630.2.1	endo-xyloglucan transferase						-2.61304		-2.41558
Solyc11g005150.1.1	extensin (class II)						-3.69735	-6.00008
Solyc04g071070.2.1	extensin		-2.73001				4.5653	5.08315
Solyc08g078020.1.1	methionine rich arabinogalactan						-2.94676	-2.92403	-2.88091
Solyc02g092790.2.1	Arabinogalactan 1			-2.14898			-8.07062
Solyc09g007660.1.1	fasciclin-like arabinogalactan protein 11-like							-9.37953	-4.11384
Solyc07g053540.1.1	fasciclin-like arabinogalactan protein 9-like							-4.40429
Solyc07g045440.1.1	fasciclin-like arabinogalactan protein 2-like						-4.59982
Solyc01g091530.2.1	fasciclin-like arabinogalactan protein 10-like						-21.5243		-11.7657
Solyc11g069250.1.1	fasciclin-like arabinogalactan protein 11-like			-2.13117				-2.70389
Solyc07g043000.2.1	proline rich protein			-6.71171				-12.583	-7.70507
Solyc12g009650.1.1	proline-rich protein							-7.05368	-11.9066
Solyc06g065970.1.1	14 kDa proline-rich protein DC2.15-like			-5.42948			-6.3064		-15.2751
Solyc08g078890.1.1	36.4 kDa proline-rich protein						-10.3918		-10.3404
Solyc09g082810.2.1	glycine-rich protein	-9.45793			-7.08832			30.9438	8.09278
Solyc12g014630.1.1	putative glycine-rich cell wall structural protein 1				2.80037
Solyc06g061200.1.1	glycine-rich protein LeGRP1			-4.39726			-2.92425	2.8705
Solyc06g051800.2.1	expansin								5.53102
Solyc03g115890.2.1	expansin			-2.02599				-5.71077
Solyc06g049050.2.1	expansin			2.59304
Solyc10g086520.1.1	expansin				2.29088			-2.06691
Solyc09g010860.2.1	expansin A4						-2.121	-3.9755	-4.51792
Solyc04g081870.2.1	expansin11								-3.16118
Solyc05g007830.2.1	expansin12	-2.87395		3.87009	3.96524				2.0756
Solyc06g076220.2.1	expansin18							-2.41403
Solyc06g005560.2.1	expansin9			-2.01535			-3.48372	-2.66725
Solyc01g112000.2.1	expansin-like protein precursor								2.42923
Solyc08g077910.2.1	expansin-like B1-like							4.39766
LIGNIN BIOSYNTHESIS
Solyc09g007920.2.1	phenylalanine ammonia-lyase-like						-8.24621
Solyc03g117870.2.1	4-coumarate--CoA ligase 1-like						2.51971
Solyc03g097030.2.1	4-coumarate--CoA ligase 2						2.04235
Solyc06g068650.2.1	4-coumarate--CoA ligase 2-like						2.91578		2.47033
Solyc11g069050.1.1	4-coumarate--CoA ligase-like 7-like								2.09132
Solyc01g107910.2.1	caffeoyl-CoA O-methyltransferase 6-like				2.0308			2.1145	2.28303
Solyc11g011340.1.1	8-hydroxygeraniol dehydrogenase	-54.4456					21.7448		27.0755
Solyc11g011330.1.1	8-hydroxygeraniol dehydrogenase-like						14.0949		9.47001
Solyc02g030480.2.1	probable cinnamyl alcohol dehydrogenase 6-like							-4.79472	-6.19527
Solyc02g084570.2.1	cytochrome P450 84A1-like						-4.94479
Solyc01g006300.2.1	peroxidase			3.44663			5.55395	13.7324	12.3411
Solyc01g105070.2.1	peroxidase						21.1244		8.02769
Solyc07g047740.2.1	peroxidase				-2.30642				-3.04492
Solyc04g071890.2.1	peroxidase 12-like						4.30878
Solyc04g071900.2.1	peroxidase 12-like							6.893
Solyc07g017880.2.1	peroxidase 16-like								2.47776
Solyc11g018800.1.1	Peroxidase 2			5.71385
Solyc09g007520.2.1	peroxidase 21-like						5.64188		11.2911
Solyc02g080530.2.1	peroxidase 42-like						-2.01453
Solyc09g072700.2.1	peroxidase 44-like			4.2862			3.7021	3.99529
Solyc06g076630.2.1	peroxidase 47-like						-3.1058
Solyc02g087190.1.1	peroxidase 63-like						-6.75634		-4.70149
Solyc02g084790.2.1	peroxidase 72-like							2.85489
Solyc02g092580.2.1	peroxidase 73-like			4.21174			4.67351	12.4492	7.51835
