# Supplementary material for: Time-Course Microarray Analysis Reveals Differences between Transcriptional Changes in Tomato Leaves Triggered by Mild and Severe Variants of Potato Spindle Tuber Viroid
Source: Viruses. 2018 May 15;10(5):257. doi: 10.3390/v10050257 (PMC5977250; doi:10.3390/v10050257)
Supplement: Supplementary file 1 [file viruses-10-00257-s001.zip › Table S8.xlsx]

## Sheet: Defense
Table S8. Differentially regulated defense-related genes during PSTVd infection.
Gene ID	NCBI description	PSTVd-M (FC)				PSTVd-S23 (FC)
		8 dpi	17 dpi	24 dpi	49 dpi	8 dpi	17 dpi	24 dpi	49 dpi
Solyc02g082930.2.1	chitinase								2.2091
Solyc02g082920.2.1	chitinase						29.2309		14.927
Solyc02g061770.2.1	chitinase			13.8507			40.3047	12.8389	29.8175
Solyc10g055800.1.1	chitinase	-2.80085		4.53378	-2.7578		6.02031	13.9041
Solyc00g323130.2.1	MLP-like protein 28-like				-2.62073			-19.1017	-10.179
Solyc04g005700.2.1	MLP-like protein 34-like		-4.31979	-3.00851			-6.69122		-8.03159
Solyc05g005865.1.1	MLP-like protein 423-like	-26.9848	-14.9583	-14.1777
Solyc09g006010.2.1	pathogenesis-related leaf protein 4-like						-2.53127
Solyc01g097240.2.1	pathogenesis-related protein P2			24.3479			139.147	130.575	68.3454
Solyc09g007010.1.1	pathogenesis-related protein P4		16.4595	209.813			189.865	1457.62	34.408
Solyc08g080650.1.1	pathogenesis-related protein PR P23	-6.41867		9.90646	-6.97827			29.1752	4.48793
Solyc09g090980.2.1	pathogenesis-related protein STH-2-like			2.51195			7.38216	9.55707	6.7065
Solyc04g064870.2.1	pathogen-related protein-like								2.36118
Solyc12g014310.1.1	pathogen-related protein-like							-2.47177
Solyc00g174330.2.1	PR protein			33.4801			17.1094	125.212
Solyc01g106610.2.1	PR-1a1 protein						47.7314		19.399
Solyc08g080670.1.1	PR5-like protein			12.7401			12.8371
Solyc08g080620.1.1	PR-5x		12.9662	103.048			614.17	251.109	43.9865
Solyc09g011540.2.1	probable glutathione S-transferase-like						8.58497		3.377
Solyc09g011590.2.1	probable glutathione S-transferase-like			5.20383			17.6606	7.63718	15.4089
Solyc07g007760.2.1	defensin-like protein P322-like	161.93	262.617
Solyc04g078200.2.1	snakin-1-like						-4.91512	2.87884
Solyc01g111080.2.1	snakin-2-like			-5.9252					4.96828
Solyc02g083880.2.1	snakin-2-like						5.84428		5.10324
Solyc04g081550.2.1	thaumatin-like protein 1-like				-3.10083		-3.25035		-5.21651
Solyc03g118780.2.1	thaumatin-like protein-like			-4.3231			-9.6822	-8.71335	-5.74261
Solyc07g047740.2.1	peroxidase				-2.30642				-3.04492
Solyc01g105070.2.1	peroxidase						21.1244		8.02769
Solyc01g006300.2.1	peroxidase			3.44663			5.55395	13.7324	12.3411
Solyc04g071900.2.1	peroxidase 12-like							6.893
Solyc04g071890.2.1	peroxidase 12-like						4.30878
Solyc07g017880.2.1	peroxidase 16-like								2.47776
Solyc09g007520.2.1	peroxidase 21-like						5.64188		11.2911
Solyc02g080530.2.1	peroxidase 42-like						-2.01453
Solyc09g072700.2.1	peroxidase 44-like			4.2862			3.7021	3.99529
Solyc06g076630.2.1	peroxidase 47-like						-3.1058
Solyc02g087190.1.1	peroxidase 63-like						-6.75634		-4.70149
Solyc02g084790.2.1	peroxidase 72-like							2.85489
Solyc02g092580.2.1	peroxidase 73-like			4.21174			4.67351	12.4492	7.51835
Solyc05g056300.2.1	thioredoxin F1, chloroplastic-like			-2.27776	-2.30607		-2.7376
Solyc12g013810.1.1	thioredoxin M4, chloroplastic-like						-4.57337	-2.61901	-6.64952
Solyc07g063190.2.1	thioredoxin M4, chloroplastic-like								-2.06446
Solyc04g071560.2.1	thioredoxin Y1, chloroplastic-like						-2.43305	-2.33401	-6.5479
Solyc12g019740.1.1	thioredoxin-like 1-1, chloroplastic-like	-4.36186				-3.10384		-3.31847
Solyc10g078920.1.1	thioredoxin-like 3-1, chloroplastic-like						-2.70908	-4.23556	-4.24887
Solyc11g008450.1.1	thioredoxin-like 3-2, chloroplastic-like						2.20854
Solyc04g078910.2.1	thioredoxin-like 4, chloroplastic-like							-2.67063
Solyc02g079960.2.1	thioredoxin-like protein CXXS1-like	-2.28332
Solyc11g066390.1.1	superoxide dismutase (SOD)							-3.12675	-7.50996
